# Supplementary material for: Treatment- and Population-Dependent Activity Patterns of Behavioral and Expression QTLs
Source: PLoS One. 2012 Feb 16;7(2):e31805. doi: 10.1371/journal.pone.0031805 (PMC3281015; doi:10.1371/journal.pone.0031805)
Supplement: Table S3 — Gene expression QTL mapping. (XLS) [file pone.0031805.s005.xls]

## Sheet: LXS_eQTLs
ProbeSetID	Symbol	Gene Chr	Gene Mb	LXS_Locus	LXS Marker Chr	LXS Marker Mb	Syntenic?	Cis?	LXS_SC_LRS	LXS_EC_LRS	LXS_SR_LRS	LXS_ER_LRS	LXS_Pattern		BXD Locus	BXD Marker Chr	BXD MarkerMb	BXD_SC_LRS	BXD_EC_LRS	BXD_SR_LRS	BXD_ER_LRS	BXD_Pattern	Conserved Pattern
ILMN_1216713	Mrpl15	1	4.78	rs6269442	1	3.48	Y	Y	59.91	45.01	44.74	49.54	1		rs6269442	1	3.48	16.41	20.34	17.78	33.94	5	0
ILMN_1231294	Mrpl15	1	4.77	rs6269442	1	3.48	Y	Y	9.05	27.86	11.21	25.13	10		rs6269442	1	3.48	3.64	3.78	0.04	2.33	0	0
ILMN_1244650	Mrpl15	1	4.77	rs6269442	1	3.48	Y	Y	6.52	25.34	17.31	19.08	3		rs6269442	1	3.48	4.2	6.2	0.01	3.19	0	0
ILMN_1250779	Mrpl15	1	4.77	rs6269442	1	3.48	Y	Y	28.96	17.88	32.77	17.86	7		rs6269442	1	3.48	18.2	26.4	30.27	39.1	15	0
ILMN_1252983	LOC386256	16	78.7	rs6269442	1	3.48	N	N	25.43	6.24	7.14	13.58	2		rs6269442	1	3.48	0	5.14	0.07	0.55	0	0
ILMN_2503166	C330011F01Rik	1	90.2	rs6269442	1	3.48	Y	N	69.74	61.97	62.24	71.56	1		rs6269442	1	3.48	13.14	43.2	19.61	43.25	10	0
ILMN_1250290	Zcwpw2	9	118	rs13475705	1	5.59	N	N	25.16	1.03	0.02	0.01	2		rs8236463	1	5.58	0.69	0	1.95	0.07	0	0
ILMN_2547657	Chchd3	6	32.8	rs13475705	1	5.59	N	N	25.73	0.39	0.02	0.04	2		rs8236463	1	5.58	1.31	0.27	1.49	1.84	0	0
ILMN_2666747	G3bp2	5	92.5	rs13475705	1	5.59	N	N	0.04	0.63	25.86	2.81	4		rs8236463	1	5.58	2.91	0.66	1	1.21	0	0
ILMN_1255996	Adam11	11	103	rs6273788	1	20.25	N	N	1.42	3.85	24.23	6.7	4		rs3670611	1	20.62	0	1.54	1.3	0.05	0	0
ILMN_1228871	4921533L14Rik	1	22.8	rs3711079	1	21.93	Y	Y	87.2	78.64	84.86	97.74	1		rs3711079	1	21.93	3.26	17.98	32.25	15.58	4	0
ILMN_2558387	Kcnq5	1	22	rs3711079	1	21.93	Y	Y	150.53	85.53	110.17	119.73	1		rs3711079	1	21.93	32.87	88.79	66.33	55.46	1	1
ILMN_1236107	Ogfrl1	1	23.4	rs13475762	1	22.8	Y	Y	131.98	82.41	181.22	120.68	1		rs13475762	1	22.85	5.49	1.71	0.74	0.06	0	0
ILMN_2737856	Cgn	3	94.6	rs13475762	1	22.8	N	N	1.75	2.14	24.45	0.02	4		rs13475762	1	22.85	0.18	0.52	0.09	4.16	0	0
ILMN_2669708	B3gat2	1	23.9	rs4222215	1	23.95	Y	Y	42.73	42.29	44.5	36.35	1		rs4222215	1	24	10.98	29.31	15.56	41.35	10	0
ILMN_1221750	Mycl1	4	123	rs13475769	1	24.85	N	N	23.95	25.36	15.43	31.55	10		mCV24784983	1	25.28	0.81	0.54	0.43	2.37	0	0
ILMN_1244190	Bai3	1	25.3	rs13475769	1	24.85	Y	Y	45.5	30.44	30.48	31.9	1		mCV24784983	1	25.28	5.66	7.54	14.04	15.28	0	0
ILMN_1221750	Mycl1	4	123	D1Mit211	1	25.46	N	N	21.46	24.51	14.92	31.58	10		rs13475772	1	25.63	1.43	1.73	0.06	0.17	0	0
ILMN_1221750	Mycl1	4	123	mCV25266528	1	27.74	N	N	26.71	21.5	26.53	31.08	14		rs3677683	1	27.32	0.86	1	0.02	0.17	0	0
ILMN_1222451	Dst	1	34.2	rs3664658	1	33.12	Y	Y	81.01	61.97	58.26	82	1		rs13475795	1	32.56	33.91	57.14	28.27	30.26	1	1
ILMN_1234419	Bag2	1	33.8	rs3664658	1	33.12	Y	Y	101.38	105.81	97.53	127.15	1		rs13475795	1	32.56	0.24	0.43	0.51	0.37	0	0
ILMN_2441548	Tsga10	1	37.8	rs3664658	1	33.12	Y	Y	34.48	25.91	24.88	18.7	12		rs13475795	1	32.56	6.72	16.5	0.25	6.2	0	0
ILMN_1255365	Txndc9	1	38	rs13475810	1	35.94	Y	Y	86.22	91.84	81.83	82.94	1		rs13475810	1	36.05	13.24	24.45	16.2	46.28	5	0
ILMN_2489210	Actr1b	1	36.8	rs13475810	1	35.94	Y	Y	29.53	41.47	21.39	19.82	6		rs13475810	1	36.05	7.06	7.95	14.38	0.56	0	0
ILMN_2650106	6330578E17Rik	1	37.5	rs13475810	1	35.94	Y	Y	26.86	43.64	26.95	28.87	1		rs13475810	1	36.05	4.84	11.94	8.79	12.57	0	0
ILMN_2731621	4921511C04Rik	1	37.2	rs13475810	1	35.94	Y	Y	31.45	6.02	11.1	10.12	2		rs13475810	1	36.05	8.37	14.95	5.83	11.28	0	0
ILMN_1255256	Sgcb	5	74	rs13475851	1	47.43	N	N	7.6	23.78	24.22	14.05	4		gnf01.044.538	1	47.26	0.01	0.19	0.4	0.67	0	0
ILMN_1259463	Ankzf1	1	75.2	rs13475872	1	52.96	Y	N	4.92	24.24	3.93	4.52	3		rs13475872	1	53.07	1.07	0.74	0	0.22	0	0
ILMN_2715585	Cyp20a1	1	60.4	rs13475875	1	54.69	Y	N	14.07	25.68	10.05	10.54	3		rs13475874	1	54.5	1.31	2.3	0	0.98	0	0
ILMN_1226990	D130017D19Rik	12	19.8	rs13475877	1	56.11	N	N	13.58	24.37	12.29	9.12	3		rs13475876	1	55.18	0.07	0.58	0.46	0.08	0	0
ILMN_2467096	B430105G09Rik	1	59.8	rs13475877	1	56.11	Y	Y	36.04	33.99	24.46	32.72	1		rs13475876	1	55.18	4.03	0.38	0.96	2.28	0	0
ILMN_2620053	Als2	1	59.2	rs13475877	1	56.11	Y	Y	26.58	25.23	15.07	20.51	6		rs13475876	1	55.18	0.09	3.1	0.08	1.54	0	0
ILMN_1220440	Ppil3	1	58.5	rs3686293	1	58.06	Y	Y	46.25	74.74	55.2	43.49	1		rs3686293	1	58.17	10.28	6.65	12.19	11.7	0	0
ILMN_1225291	ILM100770333	12	0	rs3686293	1	58.06	N	N	16.11	26.37	12.5	12.53	3		rs3686293	1	58.17	1.59	0.15	3.14	4.15	0	0
ILMN_1233713	Als2cr4	1	59.2	rs3686293	1	58.06	Y	Y	28.41	36.79	50.18	55.5	1		rs3686293	1	58.17	16.42	37.45	21.75	23.41	3	0
ILMN_1237873	Nbeal1	1	60.3	rs3686293	1	58.06	Y	Y	15.53	13.21	21.98	24.31	5		rs3686293	1	58.17	0.14	1.35	0	0	0	0
ILMN_1254814	Clk1	1	58.5	rs3686293	1	58.06	Y	Y	72.53	87.32	86.32	65.08	1		rs3686293	1	58.17	3.49	1	0.01	1.56	0	0
ILMN_2453120	C130065N10Rik	1	58.6	rs3686293	1	58.06	Y	Y	25.95	36.5	25.57	44.25	1		rs3686293	1	58.17	18.96	26.57	6.15	16.84	3	0
ILMN_2591592	BC049806	1	58.6	rs3686293	1	58.06	Y	Y	26.82	21.17	24.47	7.12	7		rs3686293	1	58.17	3.41	2.13	1.96	1.42	0	0
ILMN_2738837	Nif3l1	1	58.5	rs3686293	1	58.06	Y	Y	42.78	53.78	36.95	44.64	1		rs3686293	1	58.17	6.99	5.64	0.75	3.96	0	0
ILMN_1228961	Abi2	1	60.5	rs3661555	1	60.71	Y	Y	35.39	26.06	31.13	15.46	12		rs13475885	1	60.7	0	0.54	0.9	0.75	0	0
ILMN_2709051	BC049806	1	58.6	rs3661555	1	60.71	Y	Y	15.44	15.91	18.3	33.19	5		rs13475885	1	60.7	12.61	15.11	7.09	21.57	0	0
ILMN_2702102	D630023F18Rik	1	65.2	rs3703813	1	63.51	Y	Y	30.7	30.16	34.44	41.65	1		rs3703813	1	63.63	7.7	6.66	11.39	11.7	0	0
ILMN_2703480	Atp4b	8	13.4	rs3703813	1	63.51	N	N	0.49	1.01	0.88	24.13	5		rs3703813	1	63.63	2.53	3.05	4.42	4.34	0	0
ILMN_1227376	BC042720	1	66.7	D1Mit328	1	67.77	Y	Y	45.94	45.54	56.83	37.24	1		D1Mit328	1	67.89	10.86	10.39	9.12	6.65	0	0
ILMN_3162839	Rufy4	1	74.2	rs13475914	1	71.56	Y	Y	28.1	31.54	24.43	20.89	12		rs3687595	1	72.74	0.34	5.79	1.16	0.05	0	0
ILMN_2699338	Atg9a	1	75.2	rs3722564	1	72.05	Y	Y	42.7	48.4	45.13	41.17	1		rs3687595	1	72.74	1	1.03	1.12	0.56	0	0
ILMN_1231724	Resp18	1	75.3	D1Mit281	1	72.81	Y	Y	29.04	20.27	14.06	14.34	2		rs13475919	1	73.02	0.1	1.14	0.23	1.86	0	0
ILMN_1258341	D1Bwg1363e	1	75.5	D1Mit281	1	72.81	Y	Y	25.62	22.15	22.51	18.27	2		rs13475919	1	73.02	0.64	0.25	0.04	0.52	0	0
ILMN_1226909	5730433N10Rik	1	79.8	rs13475939	1	78.57	Y	Y	11.81	19.23	26.23	25.5	11		D1Mit216	1	79.8	0.4	0.25	2.77	0.1	0	0
ILMN_1218533	Dock10	1	80.6	rs13475950	1	81.69	Y	Y	52.11	60	52.01	37.35	1		rs13475946	1	80.72	0.6	1.76	0.62	0.72	0	0
ILMN_2626235	Lgals4	7	29.6	rs13475950	1	81.69	N	N	2.63	5.17	28.5	6.93	4		rs13475946	1	80.72	1.91	0.82	0.4	0.06	0	0
ILMN_2426752	F830005D05Rik	1	80.6	rs3708204	1	81.96	Y	Y	53.5	48.17	54.68	37.74	1		rs13475954	1	82.9	13.18	7.56	1.88	2.97	0	0
ILMN_2531100	Gm949	18	47.1	rs3708204	1	81.96	N	N	66.45	70.73	86.86	53.54	1		rs13475954	1	82.9	6.59	12.09	9.67	22.81	0	0
ILMN_2693976	Ncl	1	88.3	gnf01.085.746	1	87.61	Y	Y	46.19	66.78	58.21	51.04	1		rs3678377	1	87.69	0.11	0.14	1.34	0.9	0	0
ILMN_2430887	Asb1	1	93.5	rs3702854	1	92.65	Y	Y	40.86	45.57	40.18	41.09	1		rs13475979	1	93.22	16.25	17.1	15.14	6.72	0	0
ILMN_1218868	Cops8	1	92.5	rs13475984	1	94.54	Y	Y	74.2	103.3	100.91	68.15	1		rs13475984	1	94.61	1.34	2.46	0	0.26	0	0
ILMN_1219682	Hdac4	1	93.8	rs13475984	1	94.54	Y	Y	16.29	30.53	16.22	18.6	3		rs13475984	1	94.61	0.08	1.57	1.42	0.42	0	0
ILMN_1237430	0	1	108	D1Mit135	1	107.14	Y	Y	10.51	14.43	24.3	13.39	4		rs3696200	1	107.24	0.12	2.37	2.45	6.55	0	0
ILMN_2482600	Tnfrsf11a	1	108	D1Mit135	1	107.14	Y	Y	25.2	15.11	29.73	22.07	7		rs3696200	1	107.24	3.95	9.49	0.1	2.95	0	0
ILMN_2715585	Cyp20a1	1	60.4	D1Mit135	1	107.14	Y	N	8.46	10.82	9.9	25.07	5		rs3696200	1	107.24	0.1	2.06	0.01	0.07	0	0
ILMN_2719431	1500031H01Rik	16	4.88	rs13476089	1	124.49	N	N	0.19	24.75	3.36	0.83	3		rs13476083	1	123.36	3.54	0.37	0.06	0	0	0
ILMN_1239134	Lypd1	1	128	rs3698067	1	126.64	Y	Y	74.09	111.85	104.06	67.25	1		rs6189020	1	126.52	34.1	59.52	53.63	61.04	1	1
ILMN_1219475	Ssbp3	4	107	rs4222623	1	133.5	N	N	32.15	18.67	17.11	12.77	2		rs6250833	1	133.56	0.18	0.12	0.89	1.01	0	0
ILMN_1233725	Mfsd4	1	134	rs4222623	1	133.5	Y	Y	40.68	36.66	54.66	49.28	1		rs6250833	1	133.56	10.1	16.18	9.63	15.72	0	0
ILMN_1237629	Cntn2	1	134	rs4222623	1	133.5	Y	Y	27.34	35.02	38.42	19.95	12		rs6250833	1	133.56	4.89	5.72	1.35	1.25	0	0
ILMN_2672943	Cntn2	1	134	rs4222623	1	133.5	Y	Y	76.11	91.53	105.65	67.56	1		rs6250833	1	133.56	18.09	39.12	14.76	18.71	3	0
ILMN_1246024	Rnpep	1	137	rs6241653	1	134.92	Y	Y	57.01	60.94	73.52	63.42	1		rs6241653	1	134.99	6.15	25.22	23.96	23.56	0	0
ILMN_2506489	Nav1	1	137	rs6241653	1	134.92	Y	Y	13.4	17.04	25.81	8.42	4		rs6241653	1	134.99	0.12	3.41	7.01	1.04	0	0
ILMN_2607287	EG215714	1	138	rs6241653	1	134.92	Y	Y	33.49	31.98	49.23	34.97	1		rs6241653	1	134.99	0.9	5.65	17.38	9.68	0	0
ILMN_2609813	Chi3l1	1	136	rs6241653	1	134.92	Y	Y	28.42	20.47	24.66	14.95	7		rs6241653	1	134.99	7.73	13.04	5.66	8.71	0	0
ILMN_2612868	Etnk2	1	135	rs6241653	1	134.92	Y	Y	20.13	25.82	18.11	21.24	3		rs6241653	1	134.99	3.93	2.96	13.77	5.25	0	0
ILMN_2628567	Phlda3	1	138	rs6241653	1	134.92	Y	Y	49	61.29	72.34	50.55	1		rs6241653	1	134.99	5.44	10.67	15.15	6.78	0	0
ILMN_2647873	Nav1	1	137	rs6241653	1	134.92	Y	Y	35.08	52.15	48.7	36.77	1		rs6241653	1	134.99	8.43	16.29	8.84	15.59	0	0
ILMN_2777722	Jarid1b	1	137	rs6241653	1	134.92	Y	Y	77.98	96.3	89.43	59.69	1		rs6241653	1	134.99	7.45	34.74	36.85	33.13	15	0
ILMN_1227510	Tmem58	1	137	rs13476128	1	138.64	Y	Y	23.28	11.87	22.24	24.71	5		rs6406033	1	138.46	4.1	3.4	1.23	6.15	0	0
ILMN_2428961	Xpnpep1	19	53.1	rs13476128	1	138.64	N	N	3.36	24.67	0.24	1.41	3		rs6406033	1	138.46	0.96	1.09	1.32	2.66	0	0
ILMN_1214664	Glrx2	1	146	D1Mit100	1	145.67	Y	Y	21.58	26.44	31.55	34.77	15		rs13476148	1	144.86	0.1	0.61	0	0.6	0	0
ILMN_1252022	B830045N13Rik	1	148	D1Mit100	1	145.67	Y	Y	59.71	28.84	30.27	37.48	1		rs13476148	1	144.86	16.97	20.29	12.48	13.83	0	0
ILMN_2774596	Lamc1	1	155	D1Mit100	1	145.67	Y	N	8.81	9.55	24.21	14.25	4		rs13476148	1	144.86	0	2.06	0.26	3.59	0	0
ILMN_1219011	3110040M04Rik	1	153	rs3688042	1	153.02	Y	Y	27.94	52.91	24.6	46.82	1		rs6398113	1	153.54	1.02	0.81	0.55	4.16	0	0
ILMN_1220565	Rgsl1	1	156	rs3688042	1	153.02	Y	Y	30.47	25.46	25.23	29.06	1		rs6398113	1	153.54	17.64	6.03	3.11	5.94	0	0
ILMN_1237653	5830403L16Rik	1	156	rs3688042	1	153.02	Y	Y	26.91	9.84	7.01	4.8	2		rs6398113	1	153.54	13.04	10.73	11.1	3.16	0	0
ILMN_1238170	Zfp648	1	156	rs3688042	1	153.02	Y	Y	42.79	54.53	40.29	45.83	1		rs6398113	1	153.54	16.87	16.7	11.96	11.83	0	0
ILMN_1242946	Arpc5	1	0	rs3688042	1	153.02	Y	N	38.7	17.2	24.98	38.31	14		rs6398113	1	153.54	23.1	18.08	12.81	24.28	0	0
ILMN_2535435	LOC383579	1	153	rs3688042	1	153.02	Y	Y	20.42	39.85	22.3	38.71	10		rs6398113	1	153.54	17.73	30.18	23.04	43.58	10	10
ILMN_2600744	Rgs16	1	156	rs3688042	1	153.02	Y	Y	54.98	50.83	55.45	54.94	1		rs6398113	1	153.54	11.33	15.8	10.89	7.75	0	0
ILMN_2669982	1700025G04Rik	1	154	rs3688042	1	153.02	Y	Y	38.53	51.57	56.33	61.2	1		rs6398113	1	153.54	19.68	70.64	25.2	33.63	10	0
ILMN_1233127	AI316802	1	161	rs6318983	1	160.63	Y	Y	122.12	127.32	100.17	139.08	1		rs3653666	1	160.48	40.39	69.56	48.41	53.23	1	1
ILMN_2707245	Rfwd2	1	161	rs6318983	1	160.63	Y	Y	24.12	38.32	24.21	43.01	1		rs3653666	1	160.48	10.52	10.26	5.42	4.81	0	0
ILMN_1215909	Rc3h1	1	163	rs3693161	1	162.12	Y	Y	25.42	16.84	16.11	29.55	8		rs3693161	1	162.22	2.11	10.98	7.48	7.87	0	0
ILMN_1235549	Zbtb37	1	163	rs3693161	1	162.12	Y	Y	11.23	35.4	8.69	25.12	10		rs3693161	1	162.22	3.3	6	1.77	0.7	0	0
ILMN_1246950	Rabgap1l	1	162	rs3693161	1	162.12	Y	Y	50.68	43.04	34.59	46.35	1		rs3693161	1	162.22	13.91	18.72	6.03	4.56	0	0
ILMN_1253602	4930523C07Rik	1	162	rs3693161	1	162.12	Y	Y	47.69	67.01	46.87	48.4	1		rs3693161	1	162.22	14.11	36.3	16.04	19.6	3	0
ILMN_2474182	Dars2	1	163	rs3693161	1	162.12	Y	Y	32.2	30.22	26.87	36.63	1		rs3693161	1	162.22	6.5	11.76	2.81	1.82	0	0
ILMN_1248713	F5	1	166	rs8256589	1	165.9	Y	Y	27.12	27.39	20.16	36.74	13		rs4222763	1	165.32	5.99	10.35	5	4.01	0	0
ILMN_1250531	Slc19a2	1	166	rs8256589	1	165.9	Y	Y	52.6	65.62	67.01	63.34	1		rs4222763	1	165.32	16.73	40.25	27.89	27.08	15	0
ILMN_2630618	Nme7	1	166	rs8256589	1	165.9	Y	Y	14.17	29.37	13.84	11.24	3		rs4222763	1	165.32	3.79	12.9	0.45	7.96	0	0
ILMN_2727351	Nme7	1	166	rs8256589	1	165.9	Y	Y	33.16	12.04	6.92	33.57	8		rs4222763	1	165.32	7.13	15.25	5.84	24.26	0	0
ILMN_2436330	Usf1	1	173	rs13476232	1	172.34	Y	Y	25.75	9.76	14.84	7.12	2		rs8242766	1	172.98	4.73	2.08	0.28	2.27	0	0
ILMN_2454587	Atf6	1	173	rs13476232	1	172.34	Y	Y	72.52	75.57	64.14	60.77	1		rs8242766	1	172.98	0.19	1.35	0.05	0.3	0	0
ILMN_1221049	Nr1i3	1	173	rs8242852	1	172.89	Y	Y	28.85	26.19	21.69	24.39	13		rs8242766	1	172.98	3.14	16.35	4.89	24.87	0	0
ILMN_1239087	Pex19	1	174	rs8242852	1	172.89	Y	Y	59.26	64.88	63.07	56.3	1		rs8242766	1	172.98	39.82	34.72	30.34	55.01	1	1
ILMN_1242415	Kcnj9	1	174	rs8242852	1	172.89	Y	Y	50.38	40.52	42.95	42.13	1		rs8242766	1	172.98	19.75	28.61	26.39	41.04	15	0
ILMN_1247156	Apoa2	1	173	rs8242852	1	172.89	Y	Y	67.72	87.53	85.79	61.03	1		rs8242766	1	172.98	38.47	3.53	25.72	14.33	2	0
ILMN_1254123	Usp21	1	173	rs8242852	1	172.89	Y	Y	10.76	27.64	9.35	8.6	3		rs8242766	1	172.98	17.66	11.24	1.79	5.17	0	0
ILMN_2435505	Usf1	1	173	rs8242852	1	172.89	Y	Y	28.47	31.76	34.45	26.95	1		rs8242766	1	172.98	1.05	18.58	4.6	11.85	0	0
ILMN_2495939	Usp21	1	173	rs8242852	1	172.89	Y	Y	41.75	53.78	49.85	41.69	1		rs8242766	1	172.98	12.63	18.7	18.31	13.97	0	0
ILMN_2514451	Nit1	1	173	rs8242852	1	172.89	Y	Y	17.16	27.1	14.94	12.36	3		rs8242766	1	172.98	2.83	16.48	11.1	5.56	0	0
ILMN_2594149	Sdhc	1	173	rs8242852	1	172.89	Y	Y	50.76	64.36	55.99	48.15	1		rs8242766	1	172.98	13.8	19.42	8.69	25.58	0	0
ILMN_2681906	Copa	1	174	rs8242852	1	172.89	Y	Y	30.8	26.61	30.78	37.18	1		rs8242766	1	172.98	4.72	3.74	8.18	3.1	0	0
ILMN_2685770	Vangl2	1	174	rs8242852	1	172.89	Y	Y	46.76	51.03	48.1	44.57	1		rs8242766	1	172.98	16.52	16.8	17.63	18.43	0	0
ILMN_2687403	Fcgr3	1	173	rs8242852	1	172.89	Y	Y	53.12	72.06	53.78	51.65	1		rs8242766	1	172.98	33.46	53.87	48.77	49.53	1	1
ILMN_2713305	F11r	1	173	rs8242852	1	172.89	Y	Y	36.46	27.91	34.05	27.97	1		rs8242766	1	172.98	9.19	0.94	7.73	5.65	0	0
ILMN_2744693	Ufc1	1	173	rs8242852	1	172.89	Y	Y	23.23	21.77	38.35	12.91	4		rs8242766	1	172.98	6.04	5.25	3.67	9.97	0	0
ILMN_2754027	Nit1	1	173	rs8242852	1	172.89	Y	Y	10.15	22.19	8.46	27.31	5		rs8242766	1	172.98	0.1	8.78	0	14.48	0	0
ILMN_2775957	Apoa2	1	173	rs8242852	1	172.89	Y	Y	76.04	85.05	65.53	54.4	1		rs8242766	1	172.98	40.12	3.06	38.8	19.02	7	0
ILMN_1241541	Smyd3	1	180	rs13476241	1	174.7	Y	N	33.66	15.81	14.02	11.21	2		rs13476241	1	174.79	0.19	1.25	0.28	4.59	0	0
ILMN_1257771	Ifi205	1	176	rs13476241	1	174.7	Y	Y	60.91	77.11	67.77	56.76	1		rs13476241	1	174.79	37.47	33.69	31.98	32.31	1	1
ILMN_2656748	Darc	1	175	rs13476241	1	174.7	Y	Y	22.82	25.52	39.54	24.53	15		rs13476241	1	174.79	21.28	24.42	16.21	8.42	0	0
ILMN_2722716	Atp1a2	1	174	rs13476241	1	174.7	Y	Y	9.38	27.46	6.47	14.92	3		rs13476241	1	174.79	6.73	4.89	0.39	6.98	0	0
ILMN_2483422	Ifi204	1	176	rs3143355	1	177.67	Y	Y	28.61	19.95	21.47	18.37	2		rs4136041	1	177.37	37.49	35.36	28.88	24	12	0
ILMN_1219581	B230369F24Rik	1	180	rs6230017	1	180.03	Y	Y	71.67	53.1	61.28	63.66	1		rs13476267	1	182.21	0.57	1.75	1.35	1.1	0	0
ILMN_1231094	Smyd3	1	181	rs6230017	1	180.03	Y	Y	81.12	91.34	102.25	80.93	1		rs13476267	1	182.21	0.28	0.08	0.58	0.18	0	0
ILMN_1232313	5830417C01Rik	1	180	rs6230017	1	180.03	Y	Y	14.49	10.16	19.07	34.12	5		rs13476267	1	182.21	0.19	0.58	0.01	0.77	0	0
ILMN_1251260	Adss	1	180	rs6230017	1	180.03	Y	Y	32.21	38.01	28.18	25.84	1		rs13476267	1	182.21	0.02	1.12	3.85	3.1	0	0
ILMN_1256930	5730442P18Rik	11	103	rs6230017	1	180.03	N	N	24.65	0.23	0.47	0.67	2		rs13476267	1	182.21	1.84	0.07	0.67	0.02	0	0
ILMN_2445848	Zfp238	1	179	rs6230017	1	180.03	Y	Y	44.04	46.93	35.37	33.88	1		rs13476267	1	182.21	0	0.24	0.52	0.78	0	0
ILMN_2447991	A730054J21Rik	1	181	rs6230017	1	180.03	Y	Y	27.13	42.21	25.82	28.67	1		rs13476267	1	182.21	1.68	0.03	2.24	0.01	0	0
ILMN_2677824	Susd4	1	185	rs6230017	1	180.03	Y	Y	11.91	27.54	10.89	17.53	3		rs13476267	1	182.21	3.57	0.05	0	0.88	0	0
ILMN_1248379	LOC384475	6	113	rs6157620	1	185.26	N	N	16.77	18.28	23.59	30.54	5		rs13476281	1	186.15	0.38	0.77	0.15	0.12	0	0
ILMN_1219466	C130074G19Rik	1	187	D1Mit291	1	186.43	Y	Y	59.63	66.37	55.44	52.23	1		D1Mit291	1	186.55	4.9	0	1.76	0.14	0	0
ILMN_1226055	Kcnk2	1	191	D1Mit291	1	186.43	Y	Y	13.99	26.22	12.47	13.86	3		D1Mit291	1	186.55	0.52	0.11	0.03	3.03	0	0
ILMN_2515431	D730003I15Rik	1	193	rs13476301	1	192.28	Y	Y	38.5	25.62	33.4	19.87	12		rs3713460	1	192.87	0.31	0.05	1.72	0.85	0	0
ILMN_2592515	Angel2	1	193	rs13476301	1	192.28	Y	Y	24.46	15.98	0.99	15.67	2		rs3713460	1	192.87	0.89	4.58	2.33	0.83	0	0
ILMN_2726174	Ints7	1	193	D1Mit209	1	193.19	Y	Y	68.5	99.63	77.75	66.34	1		rs8253327	1	193.73	9.46	19.73	15.36	20.74	0	0
ILMN_1242556	Rd3	1	194	rs13476309	1	193.93	Y	Y	30.12	27.51	25.02	27.19	1		mCV23575714	1	194.09	0.78	1.21	1.29	1.7	0	0
ILMN_1257299	G0s2	1	195	rs13476309	1	193.93	Y	Y	21.52	19.36	16.57	25.87	5		mCV23575714	1	194.09	5.72	3.94	1.28	8.85	0	0
ILMN_1218955	AA408296	1	195	rs3684501	1	194.8	Y	Y	63.4	66.08	59.11	73.33	1		rs3654502	1	194.7	0.65	0.11	0.33	0.64	0	0
ILMN_2631230	AA408296	1	195	rs3684501	1	194.8	Y	Y	80.83	73.56	62.16	94.91	1		rs3654502	1	194.7	1.12	1.34	0.21	3.44	0	0
ILMN_2668260	Kcnh1	1	194	rs3684501	1	194.8	Y	Y	90.73	59.88	60.41	178.18	1		rs3654502	1	194.7	7.13	36	36.6	12.7	9	0
ILMN_1217966	1700003H04Rik	3	124	rs13476318	2	3.05	N	N	0.97	0.65	26.78	0.37	4		rs13476330	2	5.77	5.64	0	2.04	3.65	0	0
ILMN_1222589	Stxbp5l	16	37.4	rs13476318	2	3.05	N	N	0	8.68	25.1	0.28	4		rs13476330	2	5.77	1.22	0.01	2.05	0.33	0	0
ILMN_1252255	Gpm6b	X	163	rs13476318	2	3.05	N	N	4.4	0.06	24.29	0	4		rs13476330	2	5.77	5.46	0.71	0	0.57	0	0
ILMN_1253877	Gcn1l1	5	116	rs13476318	2	3.05	N	N	24.39	0.73	1.75	0.04	2		rs13476330	2	5.77	0.75	0.22	0.01	2.45	0	0
ILMN_2621930	Krt4	15	102	rs13476318	2	3.05	N	N	4.82	0.1	26.03	2.22	4		rs13476330	2	5.77	1.03	0.02	2.17	3.73	0	0
ILMN_1222228	Parp1	1	183	gnf02.001.197	2	4.17	N	N	26.42	0.51	1.75	0.03	2		rs13476330	2	5.77	3.5	1.74	0.38	1.2	0	0
ILMN_1232589	Kin	2	10	rs13476327	2	5.27	Y	Y	23.76	26.43	24.4	35.77	15		rs13476330	2	5.77	0.03	0.33	0.84	0.44	0	0
ILMN_2752371	Itih5	2	10.2	rs13476327	2	5.27	Y	Y	36.62	34.93	37.27	28.3	1		rs13476330	2	5.77	0	0.67	0.02	0.96	0	0
ILMN_2673879	Itih2	2	10	rs6159599	2	10.36	Y	Y	18.65	27.09	13.49	26.94	10		gnf02.006.767	2	9.75	2.47	0.74	0.8	1.07	0	0
ILMN_2770304	Cacna1b	2	24.5	D2Mit81	2	24.61	Y	Y	12.71	24.77	24.34	26.14	15		rs13476386	2	24.83	10.75	9.92	6.46	8.66	0	0
ILMN_1218901	Tbc1d13	2	30	rs13476407	2	29.72	Y	Y	56.98	54.64	65.49	51.11	1		rs13476408	2	30.3	0.13	0.03	0.76	0.05	0	0
ILMN_2617810	Gle1l	2	29.8	rs13476407	2	29.72	Y	Y	14.06	16.56	24.59	20.35	4		rs13476408	2	30.3	4.45	0	0.62	1.09	0	0
ILMN_1236828	Usp20	2	30.9	CEL-2_31394627	2	31.26	Y	Y	25.43	11.17	15.56	8.47	2		CEL-2_31394627	2	31.29	0.87	6.71	0.03	0.51	0	0
ILMN_1240083	Nup214	2	31.9	CEL-2_31394627	2	31.26	Y	Y	27.67	28.75	37.48	45.64	1		CEL-2_31394627	2	31.29	0	0.51	0.23	0.25	0	0
ILMN_1240146	Tor1b	2	30.8	CEL-2_31394627	2	31.26	Y	Y	102.02	95.24	92.14	106.3	1		CEL-2_31394627	2	31.29	3.9	1.39	0.42	0.7	0	0
ILMN_2664449	1700001O22Rik	2	30.7	CEL-2_31394627	2	31.26	Y	Y	20.07	19.22	25.27	16.47	4		CEL-2_31394627	2	31.29	4.66	21.85	9.76	11.6	0	0
ILMN_2667805	Ak1	2	32.5	CEL-2_31394627	2	31.26	Y	Y	18.64	24.63	16.29	23.63	3		CEL-2_31394627	2	31.29	1.2	0.9	0.45	0.56	0	0
ILMN_2749511	Mbd1	18	74.4	CEL-2_31394627	2	31.26	N	N	24.26	36.23	23.36	10.72	6		CEL-2_31394627	2	31.29	0	1.14	0.65	0.78	0	0
ILMN_2765936	5730472N09Rik	2	30.2	CEL-2_31394627	2	31.26	Y	Y	97.39	84.31	97.6	85.86	1		CEL-2_31394627	2	31.29	1.02	0.87	3.93	0.06	0	0
ILMN_1242388	Stt3b	9	115	mCV25370550	2	33.76	N	N	26.03	21.42	19.67	17.05	2		mCV25370550	2	33.8	0.95	0.08	0.04	6.1	0	0
ILMN_1253947	Traf1	2	34.8	mCV25370550	2	33.76	Y	Y	34.81	42.08	36.16	39.81	1		mCV25370550	2	33.8	8.76	25.84	13.54	25.31	0	0
ILMN_1256745	Mapkap1	2	34.5	mCV25370550	2	33.76	Y	Y	14.6	29.5	25.18	27.64	15		mCV25370550	2	33.8	13.41	7.57	0.81	12.63	0	0
ILMN_1256787	1700019L03Rik	2	32.6	mCV25370550	2	33.76	Y	Y	12.78	26.36	8.81	34.33	10		mCV25370550	2	33.8	0.19	0.06	0.3	2.12	0	0
ILMN_1258671	Fbxw2	2	34.7	mCV25370550	2	33.76	Y	Y	20.94	28.75	26.36	37.35	15		mCV25370550	2	33.8	1.86	0.01	0.48	1.91	0	0
ILMN_2493021	Fbxw2	2	34.7	mCV25370550	2	33.76	Y	Y	43.66	55.09	41.45	48.48	1		mCV25370550	2	33.8	0.95	4.19	0	0.51	0	0
ILMN_2602486	Rabepk	2	34.6	mCV25370550	2	33.76	Y	Y	34.18	49.9	38.7	31.99	1		mCV25370550	2	33.8	0.62	0.06	1.33	0.35	0	0
ILMN_1222084	Rem2	14	55.1	rs6288325	2	42.71	N	N	2.34	25.46	0.04	3.1	3		rs6288325	2	42.74	0.03	0.16	0.22	1.6	0	0
ILMN_2503987	Zbtb43	2	33.3	rs6288325	2	42.71	Y	N	19.86	20.85	25.21	28.1	11		rs6288325	2	42.74	0.03	5.97	11.44	5.57	0	0
ILMN_2774646	Myd88	9	119	rs6288325	2	42.71	N	N	28.26	14.7	19.69	22.19	2		rs6288325	2	42.74	1.38	0.02	0.41	0.32	0	0
ILMN_1221102	Arl5a	2	52.3	rs13476499	2	52.26	Y	Y	68.84	75.21	64.87	48.97	1		rs13476499	2	52.29	88.13	75.98	55.11	87.08	1	1
ILMN_1217247	Metapl1	2	71.4	rs13476548	2	65.46	Y	N	40.64	37.16	27.47	25.57	1		rs13476548	2	65.5	0.03	0.49	1.71	0.11	0	0
ILMN_1219446	4833418A01Rik	2	70.9	UT_2_70.039995	2	69.55	Y	Y	14.74	27.17	7.72	16.5	3		rs6275559	2	69.56	1	0.04	0.11	3.42	0	0
ILMN_1221280	Metapl1	2	71.3	UT_2_70.039995	2	69.55	Y	Y	50.4	31.16	32.78	26.1	1		rs6275559	2	69.56	0.11	3.51	0.65	0.52	0	0
ILMN_1223670	Itga6	2	71.7	UT_2_70.039995	2	69.55	Y	Y	61.13	37.69	47.05	43.17	1		rs6275559	2	69.56	0.15	2.55	0.11	0.83	0	0
ILMN_1229318	Pdk1	2	71.7	UT_2_70.039995	2	69.55	Y	Y	36.42	39.51	35.18	13.3	12		rs6275559	2	69.56	0.14	0.19	0.11	1.21	0	0
ILMN_1237512	D530020C15Rik	2	71.7	UT_2_70.039995	2	69.55	Y	Y	24.86	30.95	27.33	34.52	1		rs6275559	2	69.56	0.39	0.28	1.9	0.47	0	0
ILMN_1244904	Metapl1	2	71.4	UT_2_70.039995	2	69.55	Y	Y	83.39	92.59	121.62	63.07	1		rs6275559	2	69.56	0.62	0.01	0.26	1.79	0	0
ILMN_1247533	Pdk1	2	71.7	UT_2_70.039995	2	69.55	Y	Y	46.07	70.23	42.85	32.25	1		rs6275559	2	69.56	0.42	0.15	0.29	0.22	0	0
ILMN_1247893	Rapgef4	2	72	UT_2_70.039995	2	69.55	Y	Y	28.21	22.93	29.91	23.45	7		rs6275559	2	69.56	0.5	2.36	1.27	0.12	0	0
ILMN_1253142	Metapl1	2	71.4	UT_2_70.039995	2	69.55	Y	Y	43.85	52.75	52.5	44.76	1		rs6275559	2	69.56	0.86	1.97	0.04	0.22	0	0
ILMN_2474684	B230107K20Rik	2	71.1	UT_2_70.039995	2	69.55	Y	Y	59.5	71.25	63.03	42.99	1		rs6275559	2	69.56	0.28	0.39	0.24	0.24	0	0
ILMN_2747651	Hat1	2	71.3	UT_2_70.039995	2	69.55	Y	Y	27.12	16.65	25.38	19.2	7		rs6275559	2	69.56	0.28	0	0.75	0.68	0	0
ILMN_2641201	Sp5	2	70.3	UT_2_72.633351	2	72.04	Y	Y	10.6	28.31	4.66	4.29	3		rs13476571	2	72.24	0.78	0.11	1.72	3.03	0	0
ILMN_1220620	Hnrpa3	2	75.5	rs3683059	2	75.31	Y	Y	46.37	65.23	40.73	74.19	1		rs13459064	2	75.51	24.6	20.3	15.93	22.46	0	0
ILMN_1231492	Itga6	2	71.7	rs3683059	2	75.31	Y	Y	25.95	29.61	30.77	36.94	1		rs13459064	2	75.51	0.14	0	0.46	0.19	0	0
ILMN_2669774	Mettl8	2	70.8	rs3683059	2	75.31	Y	Y	35.2	42.37	39.94	36.27	1		rs13459064	2	75.51	0.02	0.12	0.47	0.63	0	0
ILMN_3163340	Rbm45	2	76.2	rs3713848	2	75.82	Y	Y	48.8	80.08	52.52	74.28	1		rs3713848	2	75.86	33.12	57.02	36.15	55.5	1	1
ILMN_2601155	Frzb	2	80.3	rs3722345	2	80.42	Y	Y	67.38	65.82	70.91	77.06	1		rs3722345	2	80.46	37.77	48.65	43.45	60.73	1	1
ILMN_2738264	Dusp19	2	80.5	rs3722345	2	80.42	Y	Y	24.08	50.72	41.6	54.36	1		rs3722345	2	80.46	4.7	13.43	4.47	8.58	0	0
ILMN_1242406	Dusp2	2	127	mCV25354178	2	91.7	Y	N	30.65	3.28	3.49	2.65	2		rs6230107	2	91.85	0.05	0.96	0.02	3.34	0	0
ILMN_1223713	Arhgap1	2	91.5	rs6230107	2	91.81	Y	Y	32.28	27.87	16.88	10.12	6		rs6230107	2	91.85	0.28	1.62	3.29	0.12	0	0
ILMN_2421046	Nup35	2	80.5	rs6230107	2	91.81	Y	N	26.81	8.46	12.66	13.16	2		rs6230107	2	91.85	9.85	13.11	5.22	8.9	0	0
ILMN_1229379	Syt13	2	92.8	rs13476639	2	92.63	Y	Y	48.03	52.08	42.43	41.92	1		rs4223268	2	93.26	0.57	0.49	0.4	0.23	0	0
ILMN_2430359	Tspan18	2	93.2	rs13476639	2	92.63	Y	Y	62.52	70.04	60.97	80.22	1		rs4223268	2	93.26	6.18	10.8	7.17	20.32	0	0
ILMN_2511768	Ttc17	2	94.1	rs13476639	2	92.63	Y	Y	90.5	97.7	90.15	87.85	1		rs4223268	2	93.26	8.72	0.41	2.2	1.08	0	0
ILMN_2675249	Slc35c1	2	92.3	rs13476639	2	92.63	Y	Y	32.46	22.28	11.99	24.52	8		rs4223268	2	93.26	3.21	0.87	0.34	2.33	0	0
ILMN_2699294	Alkbh3	2	93.8	rs13476639	2	92.63	Y	Y	37.74	62.01	46.37	57.1	1		rs4223268	2	93.26	1.69	0.11	0.15	0.11	0	0
ILMN_1223697	Cd44	2	103	rs3688911	2	96.66	Y	N	51	45.33	39.52	46.48	1		CEL-2_97928675	2	97.87	2.64	11.4	0.76	1.87	0	0
ILMN_1229775	Nphp1	2	128	rs3688911	2	96.66	Y	N	16.01	34.64	5.31	7.16	3		CEL-2_97928675	2	97.87	2.47	2.9	0.43	2.73	0	0
ILMN_2427560	Traf6	2	102	rs3688911	2	96.66	Y	Y	84.94	86.63	93.6	107.87	1		CEL-2_97928675	2	97.87	3.84	1.22	0	1.68	0	0
ILMN_2620729	Commd9	2	102	rs3688911	2	96.66	Y	N	47.68	32.14	49.64	43.04	1		CEL-2_97928675	2	97.87	0.61	1.45	0.13	0.47	0	0
ILMN_2726101	B230118H07Rik	2	101	rs3688911	2	96.66	Y	Y	26.3	30.95	31.42	36.61	1		CEL-2_97928675	2	97.87	9.36	0.05	0.11	0.01	0	0
ILMN_1234424	D430041D05Rik	2	104	gnf02.102.146	2	103.7	Y	Y	51.67	41.52	45.05	37.14	1		gnf02.102.146	2	103.74	19.17	38.06	16.62	22.24	3	0
ILMN_2501455	9630056G07Rik	2	104	gnf02.102.146	2	103.7	Y	Y	121.06	108.22	127.35	107.91	1		gnf02.102.146	2	103.74	58.94	71.44	51.7	47.12	1	1
ILMN_2595992	Slc9a8	2	167	gnf02.102.146	2	103.7	Y	N	88.43	86.61	85.64	100.8	1		gnf02.102.146	2	103.74	4.85	10.81	2.41	4.4	0	0
ILMN_1214388	Ryr3	2	113	rs6242654	2	107.04	Y	N	93.47	87.71	89.45	105.6	1		rs6242654	2	107.08	5.38	21.77	16.73	8.45	0	0
ILMN_1229253	Aven	2	112	rs6242654	2	107.04	Y	N	28.63	21.46	24.48	19.2	7		rs6242654	2	107.08	0.34	5.3	0.58	0.53	0	0
ILMN_1229286	2410042D21Rik	2	112	rs6242654	2	107.04	Y	N	16.59	4.01	2.6	28.08	5		rs6242654	2	107.08	0.52	0.01	1.58	2.22	0	0
ILMN_1255176	ENSMUSG00000074940	2	112	rs6242654	2	107.04	Y	N	65.8	58.5	51.12	63.76	1		rs6242654	2	107.08	2.98	1.31	0	7.93	0	0
ILMN_2492395	2900064A13Rik	2	112	rs6242654	2	107.04	Y	N	60.55	50.16	37.43	55.27	1		rs6242654	2	107.08	28.56	35.8	25.06	21.5	6	0
ILMN_1232525	Mrg1	2	116	D2Mit102	2	113.98	Y	Y	40.33	29.07	35.84	29.39	1		D2Mit102	2	114.12	12.92	12.62	12.68	9.79	0	0
ILMN_1220325	Pla2g4b	2	120	mCV23825533	2	117.45	Y	Y	31	36.92	21.95	25.06	13		rs13476723	2	117.12	1.05	12	4.66	6.81	0	0
ILMN_1222402	Pla2g4b	2	120	mCV23825533	2	117.45	Y	Y	26.72	15.76	11.64	29.13	8		rs13476723	2	117.12	2.69	10.35	7.71	8.38	0	0
ILMN_1222658	Mga	2	120	mCV23825533	2	117.45	Y	Y	26.84	33.44	26.12	36.39	1		rs13476723	2	117.12	0.02	0.24	0.01	0.02	0	0
ILMN_1224768	Ehd4	2	120	mCV23825533	2	117.45	Y	Y	53	34.58	47.14	44.79	1		rs13476723	2	117.12	0.42	0.33	5.64	0.14	0	0
ILMN_1226527	Ganc	2	120	mCV23825533	2	117.45	Y	Y	33.29	15.98	26.79	31.99	14		rs13476723	2	117.12	13.76	2.2	13.75	3.01	0	0
ILMN_1238065	Rpap1	2	120	mCV23825533	2	117.45	Y	Y	12.79	11.82	9.24	26.21	5		rs13476723	2	117.12	13.87	36.33	13.03	26.55	10	0
ILMN_1248304	Ndufaf1	2	119	mCV23825533	2	117.45	Y	Y	17.49	33.17	13.96	14.42	3		rs13476723	2	117.12	1.34	3.78	0	1.9	0	0
ILMN_2441359	Vps39	2	120	mCV23825533	2	117.45	Y	Y	70.18	63.81	67.29	66.43	1		rs13476723	2	117.12	0.41	0.2	1.47	1.14	0	0
ILMN_2494023	Ehd4	2	120	mCV23825533	2	117.45	Y	Y	37.07	35.21	27.12	40.01	1		rs13476723	2	117.12	12.84	0.97	2.22	3.13	0	0
ILMN_2617468	Chac1	2	119	mCV23825533	2	117.45	Y	Y	16.85	31.81	19.29	15.57	3		rs13476723	2	117.12	1.53	0.1	1.75	3.01	0	0
ILMN_2708920	Dnajc17	2	119	mCV23825533	2	117.45	Y	Y	23.87	51.69	18.9	28.91	10		rs13476723	2	117.12	1.23	11.04	0.31	4.04	0	0
ILMN_2721083	Catsper2	2	121	mCV23825533	2	117.45	Y	Y	4.13	12.08	14.11	27.19	5		rs13476723	2	117.12	10.19	14.91	14.46	6.47	0	0
ILMN_1229210	Ckap2l	2	129	rs13476749	2	123.24	Y	N	6.76	31.74	12.84	5.73	3		rs6228179	2	123.29	9.93	14.27	10.44	10.38	0	0
ILMN_2740523	Cops2	2	126	rs13476749	2	123.24	Y	Y	41.91	28.5	33.59	18.84	12		rs6228179	2	123.29	0.22	0.23	2	0.01	0	0
ILMN_2771518	Capn3	2	120	rs13476749	2	123.24	Y	Y	5.72	20.82	12.33	24.05	5		rs6228179	2	123.29	0.16	2.47	0.68	1.49	0	0
ILMN_1212605	1500011K16Rik	2	128	rs13476758	2	126.42	Y	Y	53.93	62.35	67.44	67.77	1		rs3708635	2	125.7	0.01	0.44	1.44	0	0	0
ILMN_1224279	Mall	2	128	rs13476758	2	126.42	Y	Y	18.89	19.57	22.61	29.49	5		rs3708635	2	125.7	2.69	10.33	6.39	14.91	0	0
ILMN_2723483	Rpo1-2	2	129	D2Mit304	2	128.02	Y	Y	48.33	34.03	34.1	55.8	1		rs6411422	2	128.2	90.3	78.77	60.94	63.83	1	1
ILMN_1223523	A930025D01Rik	2	130	rs13459166	2	130.23	Y	Y	16.46	19.39	22.65	28.52	5		rs8264884	2	130.88	0.06	1.88	3.67	0.43	0	0
ILMN_1232280	A930025D01Rik	2	130	rs13459166	2	130.23	Y	Y	40.6	45.55	33.69	34.84	1		rs8264884	2	130.88	0.66	1.44	6.92	0.46	0	0
ILMN_1257615	LOC208645	7	54.8	rs13459166	2	130.23	N	N	0.06	25.89	1.34	0.03	3		rs8264884	2	130.88	0.16	0.76	0.29	0.02	0	0
ILMN_2738522	Gfra4	2	131	rs13459166	2	130.23	Y	Y	5.46	2.23	26.28	11.39	4		rs8264884	2	130.88	0.02	0.09	3.61	0.11	0	0
ILMN_1226997	Rassf2	2	132	rs4223510	2	131.55	Y	Y	39.53	52.39	45.87	48.29	1		rs4223510	2	131.68	1.92	1.08	4.34	0.06	0	0
ILMN_1242684	Slc23a2	2	132	rs4223510	2	131.55	Y	Y	76.38	79.04	57.84	75.02	1		rs4223510	2	131.68	2.6	2.45	0.04	2.31	0	0
ILMN_1243306	Slc23a1	2	132	rs4223510	2	131.55	Y	Y	42.14	50.98	47.01	46.23	1		rs4223510	2	131.68	0.27	6.06	0.16	0	0	0
ILMN_1251750	5830467P10Rik	2	133	rs4223510	2	131.55	Y	Y	31.67	14.78	13.95	16.53	2		rs4223510	2	131.68	0.17	0.32	3.14	0.47	0	0
ILMN_2572849	AK030645.1	2	132	rs4223510	2	131.55	Y	Y	97.98	91.84	73.17	77.24	1		rs4223510	2	131.68	1.44	1.03	1.24	1.06	0	0
ILMN_2640927	Slc23a2	2	132	rs4223510	2	131.55	Y	Y	85.94	105.68	85.72	116.42	1		rs4223510	2	131.68	2.61	0.04	2.57	0.09	0	0
ILMN_3160621	A230067G21Rik	2	146	rs4223510	2	131.55	Y	N	12.95	12.24	16.15	28.43	5		rs4223510	2	131.68	0	0.16	0.07	0.03	0	0
ILMN_2626359	Cds2	2	132	D2Mit257	2	132.06	Y	Y	31.57	20.55	5.17	24.77	8		rs4223511	2	131.82	1.26	0.06	0.19	0.35	0	0
ILMN_1213162	BC039771	2	145	rs13476802	2	138.46	Y	N	62.43	60.23	69.26	69.33	1		rs13476805	2	139.55	33.73	35.18	38.12	30.89	1	1
ILMN_1214213	Rbbp9	2	144	rs13476802	2	138.46	Y	N	76.11	79.54	80.39	74.45	1		rs13476805	2	139.55	46.97	54.62	41.18	53.19	1	1
ILMN_1216813	2310003L22Rik	2	140	rs13476802	2	138.46	Y	Y	58.64	89.1	55.42	68.3	1		rs13476805	2	139.55	29.34	32.96	25.63	41.35	13	0
ILMN_1218370	Pcsk2	2	143	rs13476802	2	138.46	Y	Y	21.23	20.48	49.99	35.23	11		rs13476805	2	139.55	3.96	12.78	4.94	10.39	0	0
ILMN_1219601	Tasp1	2	1	rs13476802	2	138.46	Y	N	70.78	70.95	73.36	57.52	1		rs13476805	2	139.55	25.66	34.31	12.77	17.27	3	0
ILMN_1221330	Csrp2bp	2	144	rs13476802	2	138.46	Y	N	63.55	45.5	26.68	35.05	1		rs13476805	2	139.55	12.39	32.81	17.7	20.82	3	0
ILMN_1222557	D930015M12Rik	2	146	rs13476802	2	138.46	Y	N	64.54	65.79	68.33	74.22	1		rs13476805	2	139.55	0.22	0.15	2.61	0.04	0	0
ILMN_1226796	Macrod2	2	140	rs13476802	2	138.46	Y	Y	16.92	23.37	38.04	22.67	4		rs13476805	2	139.55	5.53	17.6	0.47	13.64	0	0
ILMN_1232487	B230310H07Rik	2	141	rs13476802	2	138.46	Y	Y	74.42	65.61	55.46	67.9	1		rs13476805	2	139.55	45.84	58.54	37.82	52.9	1	1
ILMN_1235602	D0Kist3	8	20	rs13476802	2	138.46	N	N	21.97	30.01	14.4	19.46	3		rs13476805	2	139.55	0.02	0.77	1.16	2.34	0	0
ILMN_1241312	A230067G21Rik	2	146	rs13476802	2	138.46	Y	N	56.07	70.6	44.38	65.76	1		rs13476805	2	139.55	0.18	0.07	0.09	0.02	0	0
ILMN_1249743	Bfsp1	2	144	rs13476802	2	138.46	Y	N	39.83	19.5	10.94	30.03	8		rs13476805	2	139.55	11.77	15.96	10.6	19.9	0	0
ILMN_1250939	Agpat5	8	18.9	rs13476802	2	138.46	N	N	24.13	21.84	20.65	25.96	8		rs13476805	2	139.55	0.18	0.1	0.37	0.24	1	1
ILMN_1257817	Macrod2	2	140	rs13476802	2	138.46	Y	Y	59.88	66.16	55.9	48.87	1		rs13476805	2	139.55	21.5	19.25	16.91	16.87	0	0
ILMN_1260045	Crnkl1	2	146	rs13476802	2	138.46	Y	N	44.22	52.75	71.84	37.74	1		rs13476805	2	139.55	0.27	0.75	0.02	0.97	0	0
ILMN_1260291	Rrbp1	2	143	rs13476802	2	138.46	Y	Y	63.98	61.96	36.3	42.6	1		rs13476805	2	139.55	17.49	27.29	23.31	27.55	10	0
ILMN_2498592	Ovol2	2	144	rs13476802	2	138.46	Y	N	29.66	58.48	25.79	36.73	1		rs13476805	2	139.55	13.15	22.5	14.51	10.7	0	0
ILMN_2602462	Snx5	2	144	rs13476802	2	138.46	Y	N	20.21	27.93	7.1	34.5	10		rs13476805	2	139.55	11.97	10.77	15.99	7.93	0	0
ILMN_2635167	Csrp2bp	2	144	rs13476802	2	138.46	Y	N	28.24	41.01	45.06	27.27	1		rs13476805	2	139.55	17.39	13.54	2.15	6.51	0	0
ILMN_2641857	Polr3f	2	144	rs13476802	2	138.46	Y	N	37.16	33	22.24	48.01	13		rs13476805	2	139.55	30.76	17.51	22.32	19.06	2	0
ILMN_2706101	Snx5	2	144	rs13476802	2	138.46	Y	N	31.58	56.24	30.67	33.47	1		rs13476805	2	139.55	15.27	10.2	9.15	12.31	0	0
ILMN_1227948	Pigt	2	164	rs13476887	2	163.51	Y	Y	51.72	66.79	50.95	52.86	1		rs13476887	2	163.65	29.64	46.79	27.31	37.46	1	1
ILMN_1229131	Wfdc3	2	165	rs13476887	2	163.51	Y	Y	93.41	83.1	64.42	62.78	1		rs13476887	2	163.65	22.91	37.99	16.82	31.22	10	0
ILMN_1243013	Wfdc3	2	165	rs13476887	2	163.51	Y	Y	17.95	19.71	8.3	24.63	5		rs13476887	2	163.65	0.48	0.3	0.3	0.35	0	0
ILMN_2674425	Sys1	2	164	rs13476887	2	163.51	Y	Y	101.02	104.73	75.28	89.67	1		rs13476887	2	163.65	15.42	46.61	25.85	17.73	3	0
ILMN_1225608	Ncoa3	2	166	rs13476892	2	165.09	Y	Y	41.91	43.71	36.56	26.81	1		rs6177049	2	165.61	0.62	3.21	3.34	2.51	0	0
ILMN_2497853	1110018N20Rik	2	167	rs13476892	2	165.09	Y	Y	51.49	49.6	49.26	58.96	1		rs6177049	2	165.61	14.12	26.8	13.26	7.16	3	0
ILMN_2640415	Spata2	2	167	rs13476892	2	165.09	Y	Y	17.13	17.4	13.89	24.01	5		rs6177049	2	165.61	0.06	3.28	0.26	3.62	0	0
ILMN_1235701	Ythdf1	2	181	rs13476944	2	180.86	Y	Y	13.65	24.84	27.76	15.28	9		rs6305540	2	180.83	0.14	0.19	1.14	0.33	0	0
ILMN_1241017	Kcnq2	2	181	rs13476944	2	180.86	Y	Y	62.8	70.33	75.63	59.65	1		rs6305540	2	180.83	44.94	72.68	54.13	49.56	1	1
ILMN_1241482	Kcnq2	2	181	rs13476944	2	180.86	Y	Y	67.56	75.73	59.77	45.96	1		rs6305540	2	180.83	0.03	10.85	0.04	0.03	0	0
ILMN_2501026	Dnajc5	2	181	rs13476944	2	180.86	Y	Y	73.3	76.43	97.77	58.17	1		rs6305540	2	180.83	36.01	63.44	41.39	38.21	1	1
ILMN_2547571	2700038C09Rik	2	0	rs13476944	2	180.86	Y	N	51.63	45.13	54.21	43.06	1		rs6305540	2	180.83	24.93	33.39	24.05	21.66	3	0
ILMN_2619179	Zbtb46	2	181	rs13476944	2	180.86	Y	Y	39.26	56.12	43.75	54.26	1		rs6305540	2	180.83	32.32	43.77	30.39	35.88	1	1
ILMN_2631745	Arfrp1	2	181	rs13476944	2	180.86	Y	Y	21.31	20.95	30.53	13.85	4		rs6305540	2	180.83	9.73	9.29	1.26	7.26	0	0
ILMN_2641946	Rtel1	2	181	rs13476944	2	180.86	Y	Y	59.63	72.63	63.32	49.73	1		rs6305540	2	180.83	44.33	49.39	20.26	31.95	13	0
ILMN_2742576	Chrna4	2	181	rs13476944	2	180.86	Y	Y	31.92	49.09	44.8	28.31	1		rs6305540	2	180.83	33.82	13.58	4.79	19.33	2	0
ILMN_2777609	Tcea2	2	181	rs13476944	2	180.86	Y	Y	45.26	34	41.01	38.86	1		rs6305540	2	180.83	13.77	35.21	30.21	27.17	15	0
ILMN_1221011	3110050N22Rik	3	7.55	rs3689073	3	7.37	Y	Y	16.78	27.82	21.84	25.98	10		rs8246984	3	7.61	10.67	12.47	5.58	6.9	0	0
ILMN_1228629	Gig	3	9.45	rs3689073	3	7.37	Y	Y	69.39	65.9	90.74	69.13	1		rs8246984	3	7.61	10.32	20.48	19.46	3.88	0	0
ILMN_2728202	6130401L20Rik	3	29.6	rs3700087	3	28.17	Y	Y	3.47	5.63	24.02	12.87	4		rs3700087	3	27.87	2.55	1.56	0.41	0.08	0	0
ILMN_1226828	Pex2	3	33	rs13475616	3	32.77	Y	Y	18.26	23.95	26.25	32.07	11		rs13475616	3	32.48	0	23.43	7.15	3.22	0	0
ILMN_2723579	Mrpl47	3	32.6	rs13475616	3	32.77	Y	Y	27.51	24.19	32.83	26.54	1		rs13475616	3	32.48	0.71	1.12	5.25	0.67	0	0
ILMN_2726905	Gnb4	3	32.5	rs13475616	3	32.77	Y	Y	66.7	63.79	80.47	69.37	1		rs13475616	3	32.48	45.81	53.02	26.16	22.79	12	0
ILMN_1221371	4932438A13Rik	3	36.8	rs13477062	3	37.03	Y	Y	23.3	17.21	25.09	27.94	11		rs13477062	3	36.74	18.43	31.5	18.92	17.27	3	0
ILMN_1242238	Cetn4	3	21	rs13477062	3	37.03	Y	N	18.51	27.37	30.48	41.66	15		rs13477062	3	36.74	28.65	25.41	21.25	23.92	2	0
ILMN_1253773	Nudt6	3	37.3	rs13477062	3	37.03	Y	Y	84.63	103.45	106.92	68.17	1		rs13477062	3	36.74	68.81	51.11	72.95	56.65	1	1
ILMN_2656511	Bbs7	3	36.5	rs13477062	3	37.03	Y	Y	35.99	33.42	37.65	33.89	1		rs13477062	3	36.74	14.89	59.22	4.78	23.92	3	0
ILMN_2663752	Pcdh10	3	45.2	rs13477072	3	40.65	Y	Y	15.96	34.74	14.11	43.54	10		rs13477072	3	40.36	1.1	1.72	4.34	2.62	0	0
ILMN_1228833	Pcdh10	3	45.2	mCV24401139	3	46.27	Y	Y	7.35	9	1.49	32.09	5		mCV24401139	3	45.97	2.07	1.13	12.32	3.07	0	0
ILMN_2463432	Slc7a11	3	50.2	mCV24401139	3	46.27	Y	Y	52.25	68.04	43.11	54.7	1		mCV24401139	3	45.97	29.25	30.6	25.31	21.81	6	0
ILMN_2740738	Slc7a11	3	50.2	mCV24401139	3	46.27	Y	Y	52.09	43.92	52.63	53.54	1		mCV24401139	3	45.97	27.59	36.02	32.44	42.08	1	1
ILMN_1241369	Gpr149	3	62.3	rs3680871	3	59.33	Y	Y	89.63	74.06	91.09	69.87	1		CEL-3_59198871	3	58.87	25.25	25.27	22.03	26.7	5	0
ILMN_2665870	Dhx36	3	62.3	rs3680871	3	59.33	Y	Y	17.65	21.14	29.79	18.22	4		CEL-3_59198871	3	58.87	3.18	1.84	0.11	4.78	0	0
ILMN_2630512	Rsrc1	3	67.2	rs3674751	3	65.76	Y	Y	41.53	49.71	60.71	44.55	1		rs3674751	3	65.47	8.33	18.51	14.06	31.23	5	0
ILMN_2717025	EG208426	3	67.9	rs3674751	3	65.76	Y	Y	22.11	29.97	20.49	16.8	3		rs3674751	3	65.47	0.01	0.01	3.2	0.22	0	0
ILMN_2591425	Gucy1a3	3	81.9	rs3718054	3	76.13	Y	N	1.15	2.61	27.03	9.06	4		rs13477204	3	75.87	7.26	6.95	1.63	1.4	0	0
ILMN_1235811	1110032E23Rik	3	79.8	gnf03.073.308	3	76.32	Y	Y	84.02	74.78	70.78	74.99	1		rs13477204	3	75.87	23.52	50.44	39.64	44.07	15	0
ILMN_2441625	1110032E23Rik	3	79.8	gnf03.073.308	3	76.32	Y	Y	50.87	60.8	29.64	38.2	1		rs13477204	3	75.87	4.57	28.8	8.31	4.34	3	0
ILMN_2693115	4930579G24Rik	3	79.4	gnf03.073.308	3	76.32	Y	Y	81.12	76.56	64.62	91.59	1		rs13477204	3	75.87	0.86	1.49	0.14	0.15	0	0
ILMN_1233537	Gucy1a3	3	81.9	gnf03.079.138	3	82.2	Y	Y	21.02	27.52	31.54	19.9	9		rs3699123	3	82.2	3.21	0.02	0.45	10.35	0	0
ILMN_1254699	Ctso	3	81.8	gnf03.079.138	3	82.2	Y	Y	41.87	55.38	57.32	52.17	1		rs3699123	3	82.2	0.05	4.92	1.8	0.78	0	0
ILMN_1220593	BC023814	3	87.7	UT_3_90.000791	3	88	Y	Y	51.26	43.25	30.83	46.58	1		UT_3_90.000791	3	87.72	10.04	9.53	1.21	9.9	0	0
ILMN_1222196	2310007A19Rik	3	94.3	UT_3_90.000791	3	88	Y	N	42.42	30.73	26.05	23.83	12		UT_3_90.000791	3	87.72	2.64	10.11	21	11.78	0	0
ILMN_1222261	5830417I10Rik	3	88.7	UT_3_90.000791	3	88	Y	Y	37.95	64.86	41.92	53.01	1		UT_3_90.000791	3	87.72	4.94	9.06	0.64	6.3	0	0
ILMN_1226745	Snx27	3	94.3	UT_3_90.000791	3	88	Y	N	9.32	7.51	28.1	11.54	4		UT_3_90.000791	3	87.72	0.21	3.02	5.32	0.06	0	0
ILMN_1228359	Rit1	3	88.5	UT_3_90.000791	3	88	Y	Y	23.7	28.57	36.73	33.14	15		UT_3_90.000791	3	87.72	0.17	1.21	5.12	0	0	0
ILMN_2545156	Cgn	3	94.6	UT_3_90.000791	3	88	Y	N	11.56	36.65	15.04	35.65	10		UT_3_90.000791	3	87.72	3.3	6.3	0.14	2.27	0	0
ILMN_2688215	1500041I23Rik	3	88.6	UT_3_90.000791	3	88	Y	Y	47.49	46.5	46.74	63.83	1		UT_3_90.000791	3	87.72	5.62	7.47	2.32	7.99	0	0
ILMN_1251524	Them4	3	94.1	UT_2_93.461287	3	90.85	Y	Y	69.25	85.2	62.52	65.56	1		UT_3_93.299511	3	90.41	14.81	47.33	36.62	38.2	15	0
ILMN_1256606	Gm659	3	94.2	UT_2_93.461287	3	90.85	Y	Y	15.53	16.1	24.78	15.98	4		UT_3_93.299511	3	90.41	6	16.21	7.84	4.38	0	0
ILMN_1259901	Them4	3	94.1	UT_2_93.461287	3	90.85	Y	Y	80.16	77.97	66.46	74.38	1		UT_3_93.299511	3	90.41	19.29	48.09	29.15	33.6	15	0
ILMN_2438793	Tmod4	3	94.9	UT_2_93.461287	3	90.85	Y	Y	33.98	31.55	16.58	22.19	6		UT_3_93.299511	3	90.41	0.63	10.42	16.84	10.01	0	0
ILMN_2488846	Tmod4	3	94.9	UT_2_93.461287	3	90.85	Y	Y	52.55	58.57	47.57	67.3	1		UT_3_93.299511	3	90.41	30.9	35.46	33.26	48.91	1	1
ILMN_2519313	Tmod4	3	94.9	UT_2_93.461287	3	90.85	Y	Y	78.94	56.81	40.83	47.33	1		UT_3_93.299511	3	90.41	14.44	19.97	12.1	25.81	0	0
ILMN_2534975	Mrpl9	3	94.3	UT_2_93.461287	3	90.85	Y	Y	30.27	30.16	21.52	29.95	13		UT_3_93.299511	3	90.41	0.01	0	2.68	0	0	0
ILMN_2679770	Mrpl9	3	94.3	UT_2_93.461287	3	90.85	Y	Y	32	39.16	32.65	40.47	1		UT_3_93.299511	3	90.41	0.2	1.4	5.59	0.31	0	0
ILMN_2734624	Tdrkh	3	94.2	UT_2_93.461287	3	90.85	Y	Y	32.31	33.06	30.19	31.87	1		UT_3_93.299511	3	90.41	0	0	2.49	0	0	0
ILMN_1247775	Casq2	3	102	rs6177289	3	96.74	Y	N	26.04	16.02	5.47	8.05	2		rs13477272	3	95.49	0.1	0.02	0.23	0	0	0
ILMN_1258372	Pex11b	3	96.5	rs6177289	3	96.74	Y	Y	29.66	36.93	21	40.21	13		rs13477272	3	95.49	0.36	0.42	0.08	0.01	0	0
ILMN_2609615	Rbm8a	3	96.4	rs6177289	3	96.74	Y	Y	41.03	39.59	25.36	31.53	1		rs13477272	3	95.49	1.17	2.9	0.33	0.01	0	0
ILMN_2672544	Gpr89	3	96.7	rs6177289	3	96.74	Y	Y	35.42	26.94	29.32	25.18	1		rs13477272	3	95.49	0.95	9.74	1.88	2.1	0	0
ILMN_2692244	Itga10	3	96.5	rs6177289	3	96.74	Y	Y	25.09	15.4	35.71	14.64	7		rs13477272	3	95.49	2.92	0.45	1.02	0.6	0	0
ILMN_1213053	Wars2	3	99	rs3708129	3	99.09	Y	Y	22.74	21.02	32.59	21.4	4		rs13477288	3	99.36	5.8	6.58	7.35	7.33	0	0
ILMN_1231601	Slc22a15	3	102	rs3708129	3	99.09	Y	Y	53.84	53.98	71.49	77.79	1		rs13477288	3	99.36	1.22	4.4	0.3	3.3	0	0
ILMN_1234698	Tspan2	3	103	rs3708129	3	99.09	Y	Y	11.69	26.71	9.81	16.03	3		rs13477288	3	99.36	0.25	0.6	0.02	0.32	0	0
ILMN_1257368	Gm566	3	104	rs3708129	3	99.09	Y	Y	41.94	22.84	18.84	26.03	8		rs13477288	3	99.36	0.64	2.73	0.05	0	0	0
ILMN_2424640	B930086A06Rik	3	99.9	rs3708129	3	99.09	Y	Y	2.97	10.97	3.84	25	5		rs13477288	3	99.36	2.14	0.34	0.05	7.76	0	0
ILMN_1233455	Olfml3	3	104	gnf03.101.460	3	102.39	Y	Y	50.06	59.91	57.14	44.78	1		rs13477294	3	101.41	0.02	0.75	2.63	1.81	0	0
ILMN_2600928	Ovgp1	3	106	gnf03.101.460	3	102.39	Y	Y	14.75	27.72	31.98	14.91	9		rs13477294	3	101.41	0.03	0.15	0.45	0.69	0	0
ILMN_2606331	AI504432	3	107	gnf03.101.460	3	102.39	Y	Y	43.73	56.5	33.52	46.14	1		rs13477294	3	101.41	4.95	8.27	1.94	0.77	0	0
ILMN_2637032	Hipk1	3	104	gnf03.101.460	3	102.39	Y	Y	21.28	36.39	22.8	29.56	10		rs13477294	3	101.41	0.25	1.47	3.1	0.5	0	0
ILMN_2638404	Dclre1b	3	104	gnf03.101.460	3	102.39	Y	Y	24.37	40.24	32.62	23.92	12		rs13477294	3	101.41	0.28	0	4.21	1.15	0	0
ILMN_2757861	Ap4b1	3	104	gnf03.101.460	3	102.39	Y	Y	26.17	35.04	41.76	26.89	1		rs13477294	3	101.41	0.42	2.51	1.17	0.01	0	0
ILMN_1225211	D130083E16Rik	3	127	rs13477320	3	109.15	Y	N	26.94	24.09	22.86	27.9	13		rs13477320	3	108.82	1.98	1.53	0.96	0	0	0
ILMN_1233693	Slc30a7	3	116	rs13477320	3	109.15	Y	N	24.49	43.94	43.67	26.74	1		rs13477320	3	108.82	8.89	14.18	5.33	4.27	0	0
ILMN_1234020	436215_218_rc-S	3	116	rs13477320	3	109.15	Y	N	21.94	20.92	23.41	25.38	5		rs13477320	3	108.82	7.67	2.53	1.87	0.16	0	0
ILMN_1250135	A930005H10Rik	3	116	rs13477320	3	109.15	Y	N	50.33	60.22	52.39	54.06	1		rs13477320	3	108.82	8.62	4.7	1.33	4.51	0	0
ILMN_1252005	Dph5	3	116	rs13477320	3	109.15	Y	N	35.47	41.72	50.47	23.48	12		rs13477320	3	108.82	9.2	20.86	4.66	5.81	0	0
ILMN_1234857	Myoz2	3	123	rs13477358	3	116.77	Y	N	65.15	71.25	75.27	53.24	1		rs6156541	3	117.11	5.04	6.78	2.86	8.03	0	0
ILMN_1236100	Rwdd3	3	121	rs13477358	3	116.77	Y	Y	29.96	36.85	32.01	36.69	1		rs6156541	3	117.11	8.46	12.64	5.85	10.34	0	0
ILMN_1237725	Arsj	3	126	rs13477358	3	116.77	Y	N	75.13	78.41	63.58	61.45	1		rs6156541	3	117.11	8.72	10.82	8.87	10.15	0	0
ILMN_1238832	G430022H21Rik	3	123	rs13477358	3	116.77	Y	N	18.54	16.46	33.87	14.83	4		rs6156541	3	117.11	4.57	6.51	11.01	2.93	0	0
ILMN_1239797	Pde5a	3	122	rs13477358	3	116.77	Y	N	73.34	73.1	90.8	43.5	1		rs6156541	3	117.11	9.35	9.43	8.3	9.52	0	0
ILMN_1243179	Sec24d	3	123	rs13477358	3	116.77	Y	N	72.95	84.04	83.09	61.84	1		rs6156541	3	117.11	8.13	12.01	10.91	6.88	0	0
ILMN_1247096	Agl	3	116	rs13477358	3	116.77	Y	Y	22.73	25.08	16.97	17.64	3		rs6156541	3	117.11	15.32	22.24	15.31	26.01	5	0
ILMN_1254713	Pde5a	3	123	rs13477358	3	116.77	Y	N	43.39	21.88	10.66	15.55	2		rs6156541	3	117.11	4.1	4.13	5.1	4.53	0	0
ILMN_1256354	Gclm	3	122	rs13477358	3	116.77	Y	N	23.03	43.85	21.43	43.28	10		rs6156541	3	117.11	0.02	4.03	0.09	1.72	0	0
ILMN_2605575	Alg14	3	121	rs13477358	3	116.77	Y	Y	34.25	37.14	54.08	53.11	1		rs6156541	3	117.11	15.7	5.83	6.7	7.82	0	0
ILMN_2753687	Arhgap29	3	122	rs6156541	3	117.4	Y	Y	25.09	18.08	30.31	19.84	7		rs6156541	3	117.11	4.64	6.56	6.04	3.57	0	0
ILMN_2684104	Egf	3	129	rs13477401	3	129.57	Y	Y	10.48	26.15	22.96	22.7	3		rs4221957	3	129.53	5.1	6.39	16.41	0.07	0	0
ILMN_1225880	Srm	4	148	rs13477402	3	129.99	N	N	1.12	0.12	24.49	0.09	4		rs4221957	3	129.53	0.18	0	0.32	0.64	0	0
ILMN_1229990	Agxt2l1	3	130	rs13477405	3	130.57	Y	Y	56.02	52.4	44.46	28.28	1		rs4221957	3	129.53	25.56	48.17	32.17	31.12	15	0
ILMN_1233274	Manba	3	135	rs3710354	3	131.52	Y	Y	40.6	31.51	34.94	36.39	1		CEL-3_133070717	3	132.19	0.96	1.49	1.25	0.43	0	0
ILMN_1228033	Gstcd	3	133	rs13477412	3	132.63	Y	Y	33.44	58.2	43.14	40.95	1		rs13477412	3	132.35	11.61	24.49	27.34	20.45	4	0
ILMN_1255047	Nhedc2	3	135	rs13477412	3	132.63	Y	Y	28.68	7.29	35.15	4.58	7		rs13477412	3	132.35	6.02	1.62	2.54	12.01	0	0
ILMN_2628594	Mttp	3	138	rs13477430	3	135.95	Y	Y	20.14	30.31	28.66	24.17	15		CEL-3_137371814	3	136.48	15.73	30.19	26.05	36.61	15	15
ILMN_1242178	Adh5	3	138	rs6357455	3	138.83	Y	Y	22.56	34.26	30.77	39.27	15		rs13477442	3	138.62	1.17	1.61	1.79	0.08	0	0
ILMN_2419480	Unc5c	3	141	rs6357455	3	138.83	Y	Y	40.44	30.95	49.59	36.38	1		rs13477442	3	138.62	7.34	11.19	3.63	4.88	0	0
ILMN_1216262	Bmpr1b	3	142	rs3718489	3	141.72	Y	Y	55.58	52.69	50.34	45.31	1		rs3090379	3	141.7	25.61	33.68	12.47	19.5	3	0
ILMN_1231939	Ccbl2	3	142	rs13477457	3	142.37	Y	Y	30.23	27.79	20.65	16.33	6		rs6290401	3	142.3	14.42	25.26	3.88	10.08	0	0
ILMN_1233293	Gbp1	3	142	rs13477457	3	142.37	Y	Y	67.43	74.73	52.72	60.95	1		rs6290401	3	142.3	1.06	0.02	6.5	3.03	0	0
ILMN_1241870	Pkn2	3	142	rs13477457	3	142.37	Y	Y	68.07	59.33	62.35	72.91	1		rs6290401	3	142.3	25.77	36.88	27.43	42.43	15	0
ILMN_2777202	Hs2st1	3	144	rs13477457	3	142.37	Y	Y	17.04	26.23	11.11	15.63	3		rs6290401	3	142.3	2.78	5.51	9.23	9.79	0	0
ILMN_1215785	Bcl10	3	146	rs13477466	3	144.42	Y	Y	17.55	30.05	28.07	27.09	15		rs13477466	3	144.14	3.12	6.42	8.66	15.35	0	0
ILMN_2660851	Bcl10	3	146	rs13477466	3	144.42	Y	Y	68.87	79.67	69.39	59.61	1		rs13477466	3	144.14	15.9	23.81	7.8	16.31	0	0
ILMN_2711608	Marveld3	8	112	rs13477466	3	144.42	N	N	0.06	0.49	33.19	1.55	4		rs13477466	3	144.14	0.26	2.37	4.16	0.03	0	0
ILMN_1246543	St6galnac3	3	153	rs3710548	3	146.21	Y	N	10.8	37.34	6.1	8.71	3		UT_3_150.551162	3	146.29	0	0.07	0.42	0.04	0	0
ILMN_1217197	ENSMUSG00000053583	3	149	gnf03.152.088	3	148.54	Y	Y	25.17	47.44	36.8	44.41	1		gnf03.152.088	3	148.27	13.79	19.83	19.11	22.19	0	0
ILMN_2432040	Zzz3	3	152	gnf03.152.088	3	148.54	Y	Y	24.08	18.99	24.51	23.28	7		gnf03.152.088	3	148.27	0.72	1.87	0.01	1.58	0	0
ILMN_2614067	Wdr63	3	146	rs3721602	3	150.55	Y	Y	27.61	11.77	10.41	4.21	2		rs3721602	3	150.27	0.11	2	0.41	0.03	0	0
ILMN_2483638	Zzz3	3	152	rs3695139	3	152.3	Y	Y	33.31	25.89	28.06	17.81	12		rs13477494	3	151.23	0.82	1.04	0.09	1.39	0	0
ILMN_2499888	Zzz3	3	152	rs3695139	3	152.3	Y	Y	28.14	20.17	29.45	14.21	7		rs13477494	3	151.23	0.65	6.69	1.35	0.38	0	0
ILMN_1224540	Eltd1	3	151	rs13477497	3	152.56	Y	Y	52.85	45.56	26.1	31.62	1		rs13477494	3	151.23	22.55	25.98	13.2	25.15	0	0
ILMN_1239550	3110003A22Rik	4	6.12	gnf04.002.599	4	5.61	Y	Y	19.35	38.24	20.53	18.3	3		gnf04.002.599	4	5.61	0	0.01	0	0.32	0	0
ILMN_2688569	Nsmaf	4	6.33	gnf04.002.599	4	5.61	Y	Y	16.67	40.89	26.65	25.23	15		gnf04.002.599	4	5.61	1.95	0.01	3.42	1.96	0	0
ILMN_1237736	Plekhf2	4	10.9	rs13477554	4	9.88	Y	Y	29.95	44.01	40.46	34.9	1		rs13477554	4	9.88	0.08	0.66	1.52	2.49	0	0
ILMN_1255193	A630034I12Rik	4	11.1	D4Mit227	4	9.93	Y	Y	11.51	20.01	30.67	33.07	11		rs13477554	4	9.88	2.79	0.71	0.01	0.17	0	0
ILMN_1257509	1110037F02Rik	4	11.5	rs13477559	4	11.15	Y	Y	7.46	30.33	8.74	15.31	3		rs13477559	4	11.15	9.14	8.04	2.64	5.69	0	0
ILMN_1213456	Dhrs7	12	73.8	mCV22933619	4	15.93	N	N	25.29	5.19	5.5	3.88	2		rs13477579	4	16.42	4.89	2.48	0.48	4.28	0	0
ILMN_1217071	Mmp16	4	18	mCV22933619	4	15.93	Y	Y	18.67	25.28	18.93	29.46	10		rs13477579	4	16.42	0.02	0	2.62	7.88	0	0
ILMN_1216618	LOC384000	4	24.6	rs13477611	4	24.68	Y	Y	44.85	39.17	44.5	40.16	1		rs13477607	4	23.42	2.49	0.47	1.73	0.17	0	0
ILMN_2685821	Fut9	4	25.6	rs13477617	4	27.05	Y	Y	9.84	35.84	25.24	25.06	15		rs13477622	4	28.25	2.52	0.1	0.02	2.3	0	0
ILMN_2707188	Map3k7	4	32.1	rs3701432	4	29.43	Y	Y	24.41	32.92	31.08	29.08	1		rs3701432	4	29.19	12.42	21.21	0	7.89	0	0
ILMN_1221526	D130052N13Rik	4	42.8	rs3684104	4	38.51	Y	Y	16.16	24.52	20.83	28.31	10		rs6232550	4	40.97	31.01	37.26	27.87	23.57	12	0
ILMN_2617920	1110017D15Rik	4	41.5	rs3684104	4	38.51	Y	Y	11	29.8	10.22	26.43	10		rs6232550	4	40.97	10.25	7.85	2.51	11.43	0	0
ILMN_2663403	Ccl19	4	42.8	rs3684104	4	38.51	Y	Y	22.85	21.32	3.81	25.27	5		rs6232550	4	40.97	0.15	0.25	2.98	0	0	0
ILMN_2446401	2310028H24Rik	4	41.5	rs4138630	4	41.85	Y	Y	18.52	26.97	15.81	12.43	3		rs6232550	4	40.97	9.12	12.83	0.76	8.23	0	0
ILMN_2646313	4930412F15Rik	4	43.7	rs4138630	4	41.85	Y	Y	27.81	49.63	25.44	29.63	1		rs6232550	4	40.97	0	3.39	0.09	0	0	0
ILMN_2744879	Dnaic1	4	41.6	rs4138630	4	41.85	Y	Y	20.41	31.49	21.55	31.54	10		rs6232550	4	40.97	5.68	8.3	13.05	7.77	0	0
ILMN_2775767	1700008B15Rik	4	42.6	rs4138630	4	41.85	Y	Y	76.84	81.13	94.75	61.45	1		rs6232550	4	40.97	12.66	19.99	5.3	7.82	0	0
ILMN_1223695	5830415F09Rik	4	46.4	rs4224463	4	45.34	Y	Y	75.66	65.86	66.24	56.79	1		rs13477678	4	45.5	18.66	32	23.14	28.7	10	0
ILMN_1228909	LOC269531	4	46	rs4224463	4	45.34	Y	Y	24.51	26.65	29.6	25.07	1		rs13477678	4	45.5	0.02	8.48	1.03	1.33	0	0
ILMN_2482209	Tpm2	4	43.5	rs4224463	4	45.34	Y	Y	28.77	12.8	5.99	2.17	2		rs13477678	4	45.5	0.1	0.16	1.33	0.85	0	0
ILMN_2675239	Mcart1	4	45.4	rs4224463	4	45.34	Y	Y	38.79	42.45	36.17	32.79	1		rs13477678	4	45.5	10.76	3.34	0.76	0.62	0	0
ILMN_3163279	Foxe1	4	46.4	rs4224463	4	45.34	Y	Y	35.5	21.41	18.15	19.75	2		rs13477678	4	45.5	0.01	12.87	7.99	7.47	0	0
ILMN_1259152	Col9a3	2	180	rs3707178	4	47.06	N	N	0.18	25.12	0.57	4.42	3		rs3707178	4	47.05	0.55	3.2	2.57	0.03	0	0
ILMN_2612904	Anks6	4	47	rs3707178	4	47.06	Y	Y	73.8	102.82	89.14	91.97	1		rs3707178	4	47.05	0.04	1.13	1.4	0.07	0	0
ILMN_1226226	A230095P17Rik	4	88.4	rs13477813	4	84.1	Y	Y	48.14	36.43	32	42.88	1		CEL-4_82641197	4	84.01	0.07	0.64	0	2.65	0	0
ILMN_1242746	Mllt3	4	87.7	rs13477813	4	84.1	Y	Y	15.34	30.27	23.51	14.97	3		CEL-4_82641197	4	84.01	1.98	13.83	1	7.17	0	0
ILMN_2646625	Jun	4	94.7	rs13477853	4	94.95	Y	Y	35.05	23.94	7.16	26.32	8		rs13477852	4	94.94	9.72	0.65	0.39	1.84	0	0
ILMN_1230021	Cyp2j9	4	96.2	rs3659791	4	95.44	Y	Y	67.34	29.31	49.93	33.61	1		rs3687764	4	95.42	1.58	0.9	0.02	0.01	0	0
ILMN_2719908	Cyp2j9	4	96.2	rs3659791	4	95.44	Y	Y	26.62	28.03	16.88	22.52	6		rs3687764	4	95.42	1.99	0.12	0.11	0.75	0	0
ILMN_2490495	Inadl	4	98.4	rs13477864	4	98.21	Y	Y	32.14	24.47	18.81	26.08	13		rs13477866	4	98.99	12.61	10.65	5.05	6.82	0	0
ILMN_2615110	2210012G02Rik	4	107	rs13477864	4	98.21	Y	N	7.81	15.23	34.47	9.07	4		rs13477866	4	98.99	1.41	0.2	6.77	1.74	0	0
ILMN_1213858	Itgb3bp	4	99.5	rs3682140	4	99.3	Y	Y	72.43	61.49	70.56	70.85	1		rs13477866	4	98.99	1.37	0.05	0.89	0.46	0	0
ILMN_1230977	Pgm2	4	99.7	rs3682140	4	99.3	Y	Y	75.36	66.16	57.41	69.91	1		rs13477866	4	98.99	0.13	1.35	0.11	0.02	0	0
ILMN_1242540	Alg6	4	99.4	rs3682140	4	99.3	Y	Y	43.68	47.03	31.49	32.67	1		rs13477866	4	98.99	7.44	0.1	0.04	0.33	0	0
ILMN_2687391	Wdr78	4	103	rs6206848	4	101.71	Y	Y	31.45	32.25	33.93	37.29	1		rs13477873	4	101.1	1.36	0.52	0.31	0.13	0	0
ILMN_1221684	Scp2	4	108	rs13477881	4	103.14	Y	Y	25.97	38.54	18.46	17.07	6		rs13477881	4	103.31	5.51	0.41	1.35	1.36	0	0
ILMN_1226642	2210012G02Rik	4	107	rs13477881	4	103.14	Y	Y	43.81	39.51	36.54	35.89	1		rs13477881	4	103.31	20.17	40.78	25.08	13.56	3	0
ILMN_1229370	Podn	4	108	rs13477881	4	103.14	Y	Y	39.86	34.66	26.36	34.49	1		rs13477881	4	103.31	10.4	22.46	3.22	6.63	0	0
ILMN_1243112	Nrd1	4	109	rs13477881	4	103.14	Y	N	17.05	26.69	28.1	17.51	9		rs13477881	4	103.31	0	3.85	1.46	0.32	0	0
ILMN_1247919	2210012G02Rik	4	107	rs13477881	4	103.14	Y	Y	113.72	116.01	100.02	90.05	1		rs13477881	4	103.31	30.06	48.21	38.72	25.37	12	0
ILMN_1259079	Rab3b	4	109	rs13477881	4	103.14	Y	N	26.24	34.91	27.59	37.43	1		rs13477881	4	103.31	0.6	2.33	3.22	0.17	0	0
ILMN_2733465	Acot11	4	106	rs13477881	4	103.14	Y	Y	36	38.86	30.46	39.14	1		rs13477881	4	103.31	3.28	10.97	0.62	0.25	0	0
ILMN_2756023	Pcsk9	4	106	rs13477881	4	103.14	Y	Y	28.22	50.4	24.8	31.11	1		rs13477881	4	103.31	0.12	0.08	1.45	0.01	0	0
ILMN_1224834	LOC230628	4	114	rs13477912	4	111.02	Y	Y	16.74	31.36	19.8	24.27	10		rs3659850	4	110.97	7.36	18.38	0.39	7.48	0	0
ILMN_1229163	Faah	4	116	rs3670129	4	114.43	Y	Y	16.55	24.08	18.66	17.78	3		gnf04.110.583	4	114.51	5.1	9.16	4.84	1.02	0	0
ILMN_1258359	Atpaf1	4	115	rs3670129	4	114.43	Y	Y	69.46	79.73	79.02	74.85	1		gnf04.110.583	4	114.51	25.86	50.72	26.85	56.24	15	0
ILMN_1218967	Kif2c	4	117	rs3689378	4	116.45	Y	Y	44.56	29.73	28.5	14.94	12		rs13477933	4	116.78	12	18.06	14.39	9.08	0	0
ILMN_1237651	Ipp	4	116	rs3689378	4	116.45	Y	Y	25.02	18.93	29.26	20.38	7		rs13477933	4	116.78	0.71	0.01	4.53	0.15	0	0
ILMN_1238290	C1orf146	5	108	rs3689378	4	116.45	N	N	27.57	0.29	0.03	5.17	2		rs13477933	4	116.78	0.01	0.2	1.44	1.34	0	0
ILMN_1255854	Mtap9	3	82.2	rs3689378	4	116.45	N	N	24.53	8.42	1.43	4.98	2		rs13477933	4	116.78	0.16	1.64	0.57	0.04	0	0
ILMN_1257106	Lipc	9	70.7	rs3689378	4	116.45	N	N	1.11	24.07	11.31	0.11	3		rs13477933	4	116.78	2.83	0.44	0.1	0.06	0	0
ILMN_1258791	Jmjd2a	4	118	rs3689378	4	116.45	Y	Y	31.28	35.18	31.71	32.45	1		rs13477933	4	116.78	0.62	1.87	0.09	2.28	0	0
ILMN_2536832	LOC381542	4	117	rs3689378	4	116.45	Y	Y	35.05	11.58	31.99	20.25	7		rs13477933	4	116.78	8.13	8.04	6.9	7.55	0	0
ILMN_2611124	9530048O09Rik	4	117	rs3689378	4	116.45	Y	Y	31.5	36.76	37.14	32.42	1		rs13477933	4	116.78	0.69	0.1	3.44	7.44	0	0
ILMN_2687372	Hectd3	4	117	rs3689378	4	116.45	Y	Y	22.34	26.91	26.9	34.7	15		rs13477933	4	116.78	1.39	0.03	3.67	2.16	0	0
ILMN_2694257	Ccdc28b	4	129	rs3689378	4	116.45	Y	N	31.85	3.06	2.27	17.71	2		rs13477933	4	116.78	0.95	0.28	1.2	2.38	0	0
ILMN_1220467	LOC384396	6	65.7	rs13477939	4	117.94	N	N	25.35	0.01	0.43	0.37	2		rs13477939	4	118.12	0.07	0.18	0.18	2.68	0	0
ILMN_1231377	1700041C02Rik	4	119	rs13477939	4	117.94	Y	Y	21.89	17.56	22.21	25.45	5		rs13477939	4	118.12	2.71	5.35	3.26	8.69	0	0
ILMN_1248210	Ebna1bp2	4	118	rs13477939	4	117.94	Y	Y	72.87	73.28	66.54	57.59	1		rs13477939	4	118.12	32.77	26.03	32.37	26.65	1	1
ILMN_1249278	AU022252	4	119	rs13477939	4	117.94	Y	Y	52.93	49.99	42.73	44.79	1		rs13477939	4	118.12	0.75	0.28	1.15	1.1	0	0
ILMN_2611422	Hyi	4	118	rs13477939	4	117.94	Y	Y	68.24	61.19	74.68	60.57	1		rs13477939	4	118.12	0	0.1	0	0.58	0	0
ILMN_2614559	4930538K18Rik	4	119	rs13477939	4	117.94	Y	Y	69.28	75.36	79.59	64.01	1		rs13477939	4	118.12	2.03	4.84	0.05	0.22	0	0
ILMN_2627929	Hivep3	4	120	rs13477939	4	117.94	Y	Y	96.19	96.85	69.06	99.98	1		rs13477939	4	118.12	1.41	3.36	6.01	0.45	0	0
ILMN_2691567	Hyi	4	118	rs13477939	4	117.94	Y	Y	85.34	87.97	87.69	88.63	1		rs13477939	4	118.12	19.1	32.41	13.37	21.65	3	0
ILMN_2702508	Ebna1bp2	4	118	rs13477939	4	117.94	Y	Y	20.01	26.43	29.09	20.69	9		rs13477939	4	118.12	8.18	14.35	0.19	11.29	0	0
ILMN_2703138	Tmem125	4	118	rs13477939	4	117.94	Y	Y	63.27	48.86	43.83	52.41	1		rs13477939	4	118.12	0.85	9.36	0.96	5.73	0	0
ILMN_2736168	Ppt1	4	123	rs13477939	4	117.94	Y	Y	28.86	18.77	9.51	7.13	2		rs13477939	4	118.12	0.95	4.01	0	0.93	0	0
ILMN_2755351	BC035295	4	119	rs13477939	4	117.94	Y	Y	18.93	25.49	27.86	31.59	15		rs13477939	4	118.12	26.04	35.05	31.42	20.84	12	0
ILMN_1230993	9930104L06Rik	4	125	CEL-4_121636473	4	122.77	Y	Y	32.2	16.92	35.12	20.15	7		UT_4_121.927901	4	122.54	0.25	0.04	0.49	0.59	0	0
ILMN_1231962	Mycbp	4	124	CEL-4_121636473	4	122.77	Y	Y	24.53	29.52	15.97	27.33	13		UT_4_121.927901	4	122.54	1.49	0	0.46	0.38	0	0
ILMN_1240341	2610315N17Rik	10	80.4	CEL-4_121636473	4	122.77	N	N	24.96	3.25	1.79	0.28	2		UT_4_121.927901	4	122.54	0.37	0.11	0.18	0.06	0	0
ILMN_1242932	LOC381554	4	127	CEL-4_121636473	4	122.77	Y	Y	28.35	12.59	10.88	25.83	8		UT_4_121.927901	4	122.54	2.69	0.19	0.5	1.14	0	0
ILMN_2662054	Hpcal4	4	123	CEL-4_121636473	4	122.77	Y	Y	61.82	67.74	50.56	73.56	1		UT_4_121.927901	4	122.54	5.71	1.1	0.1	6.93	0	0
ILMN_2686865	Rspo1	4	125	CEL-4_121636473	4	122.77	Y	Y	33.38	24.57	17.29	24.85	13		UT_4_121.927901	4	122.54	1.18	0.19	0.71	1.73	0	0
ILMN_2700214	2610028E06Rik	4	126	CEL-4_121636473	4	122.77	Y	Y	30.63	14.3	9.91	19.45	2		UT_4_121.927901	4	122.54	0.94	2.11	6.22	3.5	0	0
ILMN_2720334	Utp11l	4	124	CEL-4_121636473	4	122.77	Y	Y	38.74	49.57	48.51	35.31	1		UT_4_121.927901	4	122.54	1.05	1.34	0.95	3.89	0	0
ILMN_2770414	Rragc	4	124	CEL-4_121636473	4	122.77	Y	Y	51.82	44.22	53.46	57.29	1		UT_4_121.927901	4	122.54	1.83	0.05	0.11	0.54	0	0
ILMN_1245420	Zmym6	4	127	rs13477965	4	126.21	Y	Y	168.64	177.42	166.93	167.85	1		rs13477965	4	126.39	16.3	30.14	16.75	18.14	3	0
ILMN_1245569	D630001M21Rik	4	127	rs13477965	4	126.21	Y	Y	44.07	29.11	44.79	43.32	1		rs13477965	4	126.39	1.62	0.09	0.02	0	0	0
ILMN_1249638	Rbbp4	4	129	rs13477965	4	126.21	Y	Y	53.5	39.92	55.53	56.22	1		rs13477965	4	126.39	2.03	2.52	0.74	0.03	0	0
ILMN_1256779	Zmym6	4	127	rs13477965	4	126.21	Y	Y	81.83	74	73.7	79.85	1		rs13477965	4	126.39	14.41	22.82	8.78	14.7	0	0
ILMN_1258339	LOC230760	4	128	rs13477965	4	126.21	Y	Y	46.94	46.64	48.31	51.11	1		rs13477965	4	126.39	1.44	1.11	0.03	4.68	0	0
ILMN_2620942	Trim62	4	129	rs13477965	4	126.21	Y	Y	71.18	64.85	87.75	84.44	1		rs13477965	4	126.39	1.39	0.11	0.04	0.04	0	0
ILMN_2706061	Sfpq	4	127	rs13477965	4	126.21	Y	Y	35.07	28.17	37.65	37.1	1		rs13477965	4	126.39	0	0.1	1.38	2.09	0	0
ILMN_2737704	Gja4	4	127	rs13477965	4	126.21	Y	Y	29.59	20.9	21.5	42.3	8		rs13477965	4	126.39	0.21	0.61	2.06	1.21	0	0
ILMN_2740159	Zbtb8os	4	129	rs13477965	4	126.21	Y	Y	31.68	31.16	27.9	32.95	1		rs13477965	4	126.39	0.14	0.72	0.75	1.67	0	0
ILMN_1214878	Fndc5	4	129	rs3023009	4	129.07	Y	Y	13.95	20.46	26.87	15.73	4		rs3023009	4	129.25	0.12	1.76	0.06	5.12	0	0
ILMN_1218089	LOC384062	4	129	rs3023009	4	129.07	Y	Y	43.84	51.77	69.52	70.22	1		rs3023009	4	129.25	35.94	47.19	33.63	40.07	1	1
ILMN_1220430	Ccdc28b	4	129	rs3023009	4	129.07	Y	Y	25.4	2.77	10.74	13.24	2		rs3023009	4	129.25	1.53	0	0.48	4.44	0	0
ILMN_1230623	Rbbp4	4	129	rs3023009	4	129.07	Y	Y	27.15	14.67	8.04	14.83	2		rs3023009	4	129.25	2.4	1.26	0.51	0.01	0	0
ILMN_1233169	2510006D16Rik	4	129	rs3023009	4	129.07	Y	Y	83.1	95.77	132.52	106.79	1		rs3023009	4	129.25	45.68	64.41	57.59	52.83	1	1
ILMN_1249182	Hdac1	4	129	rs3023009	4	129.07	Y	Y	45.29	26.45	26.36	24.56	1		rs3023009	4	129.25	2.28	13.57	0.91	0.49	0	0
ILMN_1249749	Nudc	4	133	rs3023009	4	129.07	Y	Y	28.66	17.01	8.8	18.25	2		rs3023009	4	129.25	3.03	4.26	1.58	6.44	0	0
ILMN_2467727	Pum1	4	130	rs3023009	4	129.07	Y	Y	25.94	29.57	5.84	5.98	6		rs3023009	4	129.25	0.94	0.12	0.02	4.67	0	0
ILMN_2598946	Bai2	4	130	rs3023009	4	129.07	Y	Y	14.67	18.84	29.34	15.35	4		rs3023009	4	129.25	0.9	0.19	0.05	3.53	0	0
ILMN_2660663	Ak2	4	129	rs3023009	4	129.07	Y	Y	44.26	42.24	43.94	33.03	1		rs3023009	4	129.25	0.03	0.34	0.06	0.36	0	0
ILMN_2728155	Arhgef15	11	68.8	rs3023009	4	129.07	N	N	24	1.93	0.04	2.76	2		rs3023009	4	129.25	1.5	3.11	2.87	2.75	0	0
ILMN_2733514	Hdac1	4	129	rs3023009	4	129.07	Y	Y	44.28	51.21	40.56	50.88	1		rs3023009	4	129.25	15.03	24.82	9.1	29.52	5	0
ILMN_1214375	Atpbd1b	4	133	rs13477982	4	130.56	Y	Y	86.64	96.75	77.39	66.45	1		CEL-4_130248229	4	131.56	33.34	40.24	39.29	26.24	1	1
ILMN_1214944	Aim1l	4	134	rs13477982	4	130.56	Y	Y	26.99	29.43	27.85	19.49	12		CEL-4_130248229	4	131.56	2.15	0.16	2.47	1.76	0	0
ILMN_1215877	Extl1	4	134	rs13477982	4	130.56	Y	Y	55.13	48.13	41.56	40.23	1		CEL-4_130248229	4	131.56	4.05	12.95	4.98	6.34	0	0
ILMN_1218923	ILM3140129	4	0	rs13477982	4	130.56	Y	N	53.51	68.2	41.85	52.01	1		CEL-4_130248229	4	131.56	24.95	30.27	19.33	27.73	10	0
ILMN_1229834	Gm1672	4	131	rs13477982	4	130.56	Y	Y	36.71	18.69	32.23	28.51	14		CEL-4_130248229	4	131.56	0.03	0.09	0.43	1.62	0	0
ILMN_1235638	A830007F21Rik	4	133	rs13477982	4	130.56	Y	Y	13.27	20.85	8.8	24.16	5		CEL-4_130248229	4	131.56	2.14	12.91	1.89	5.51	0	0
ILMN_1249234	9530096D07Rik	4	132	rs13477982	4	130.56	Y	Y	30.05	25.88	21.5	21.49	6		CEL-4_130248229	4	131.56	0.15	0.1	0.4	0.34	0	0
ILMN_2490820	2310005L22Rik	4	132	rs13477982	4	130.56	Y	Y	23.77	34.6	15.5	21.57	3		CEL-4_130248229	4	131.56	0.05	0.98	1.2	1.66	0	0
ILMN_2495363	Wasf2	4	133	rs13477982	4	130.56	Y	Y	30.14	24.92	22.67	18.01	6		CEL-4_130248229	4	131.56	3.19	6.77	5.95	13.51	0	0
ILMN_2498659	Tom1l2	11	60.1	rs13477982	4	130.56	N	N	59.26	47.51	46.75	59.49	1		CEL-4_130248229	4	131.56	10.75	16.72	11.47	12.3	0	0
ILMN_2600465	Phactr4	4	132	rs13477982	4	130.56	Y	Y	35.88	40.38	28	42.72	1		CEL-4_130248229	4	131.56	0.31	0.06	0.19	1.28	0	0
ILMN_2643723	Pef1	4	130	rs13477982	4	130.56	Y	Y	2.39	29.68	8.52	17.42	3		CEL-4_130248229	4	131.56	1.3	4.22	0.02	1.74	0	0
ILMN_2651054	Sytl1	4	133	rs13477982	4	130.56	Y	Y	34.06	28.88	16.72	30.21	13		CEL-4_130248229	4	131.56	1.85	5.97	5.53	9.84	0	0
ILMN_2660862	Sepn1	4	134	rs13477982	4	130.56	Y	Y	35.73	33.8	29.06	30.04	1		CEL-4_130248229	4	131.56	2.93	5.34	1.52	9.21	0	0
ILMN_2689187	Ahdc1	4	133	rs13477982	4	130.56	Y	Y	42.84	31.15	22.45	27.77	13		CEL-4_130248229	4	131.56	8.89	14.85	11.61	10.65	0	0
ILMN_2694857	Gpatch3	4	133	rs13477982	4	130.56	Y	Y	30.49	39.37	27.33	32.04	1		CEL-4_130248229	4	131.56	14.33	20.97	7.35	19.89	0	0
ILMN_2703621	Zfp593	4	134	rs13477982	4	130.56	Y	Y	63.29	55	64.93	42.42	1		CEL-4_130248229	4	131.56	7.29	28.23	14.24	11.18	3	0
ILMN_2718910	Slc30a2	4	134	rs13477982	4	130.56	Y	Y	11.35	12.34	10.24	25.21	5		CEL-4_130248229	4	131.56	0.08	0.52	0.54	0.07	0	0
ILMN_2745425	Rcc1	4	132	rs13477982	4	130.56	Y	Y	13.79	13.68	13.18	24.51	5		CEL-4_130248229	4	131.56	0.26	1.22	1.97	0.05	0	0
ILMN_2759983	Ccdc21	4	134	rs13477982	4	130.56	Y	Y	28.48	29.39	41.11	31.06	1		CEL-4_130248229	4	131.56	9.5	9.71	9.53	18.94	0	0
ILMN_1230546	Clic4	4	135	rs13477996	4	134.36	Y	Y	82.28	80.35	69.99	83.41	1		rs3663950	4	135.29	1.54	1.62	0.29	3.74	0	0
ILMN_1252865	Zfp46	4	136	rs13477996	4	134.36	Y	Y	14.33	8.02	3.91	25.12	5		rs3663950	4	135.29	15.52	18.9	16.31	15.6	0	0
ILMN_1256234	Hmgcl	4	136	rs13477996	4	134.36	Y	Y	16.16	42.08	24.59	21.76	9		rs3663950	4	135.29	0.13	1.83	2.06	0.5	0	0
ILMN_2579927	Npal3	4	1	rs13477996	4	134.36	Y	N	50.32	33.35	35.73	35.41	1		rs3663950	4	135.29	14.93	33.69	21.84	11.98	3	0
ILMN_2652394	Tceb3	4	136	rs13477996	4	134.36	Y	Y	30.41	34.89	18.74	35.27	13		rs3663950	4	135.29	9.33	26.23	17.33	11.8	3	0
ILMN_2683811	Gale	4	136	rs13477996	4	134.36	Y	Y	7.54	19.57	25.24	25.62	11		rs3663950	4	135.29	3.52	1.24	7.49	1.35	0	0
ILMN_2715931	6030445D17Rik	4	136	rs13477996	4	134.36	Y	Y	68.47	74.72	58.87	64.66	1		rs3663950	4	135.29	20.11	15.13	7.26	10.46	0	0
ILMN_2754515	BC059177	4	137	rs13477996	4	134.36	Y	Y	62.98	58.23	39.95	61.61	1		rs3663950	4	135.29	14.51	25.97	9.03	26.4	5	0
ILMN_1257126	Fuca1	4	135	rs4224852	4	136.49	Y	Y	12.62	35.14	6.56	16.05	3		rs13478002	4	136.23	2.09	4.35	1.91	0.56	0	0
ILMN_2574618	B430215E05Rik	4	138	rs4224852	4	136.49	Y	Y	28.18	11.44	12.89	8.55	2		rs13478002	4	136.23	4.4	15.16	6.19	6.2	0	0
ILMN_2619620	C1qb	4	136	rs4224852	4	136.49	Y	Y	25.71	30.61	24.33	18.67	12		rs13478002	4	136.23	14.58	4.16	11.91	8.31	0	0
ILMN_2745993	Ece1	4	138	rs4224852	4	136.49	Y	Y	33.43	48.5	43.27	39.5	1		rs13478002	4	136.23	7.36	1.44	5.4	1.6	0	0
ILMN_1216271	Ubxd3	4	138	rs6234904	4	137.87	Y	Y	13.67	28.38	21.36	20.77	3		rs6234904	4	138.15	0.45	0.75	2.99	10.25	0	0
ILMN_1216465	LOC329967	4	139	rs6234904	4	137.87	Y	Y	36.15	32.57	25.05	38.95	1		rs6234904	4	138.15	12.01	27.51	10.97	21.14	3	0
ILMN_1223353	Hp1bp3	4	138	rs6234904	4	137.87	Y	Y	29.08	36.82	31.68	27.79	1		rs6234904	4	138.15	3.02	0.92	2.36	9.94	0	0
ILMN_1255556	Pink1	4	138	rs6234904	4	137.87	Y	Y	20.79	20.55	25.97	31.88	11		rs6234904	4	138.15	0	0	0.07	6.41	0	0
ILMN_2615134	Otud3	4	138	rs6234904	4	137.87	Y	Y	29.73	31.63	31.66	39.12	1		rs6234904	4	138.15	3.4	6.88	10.25	0.08	0	0
ILMN_2653881	0610009K11Rik	4	138	rs6234904	4	137.87	Y	Y	57.37	65.37	77.69	60.21	1		rs6234904	4	138.15	36.27	60.43	37.71	44.31	1	1
ILMN_2704842	Kif17	4	138	rs6234904	4	137.87	Y	Y	27.1	27.13	31.18	26.01	1		rs6234904	4	138.15	17.39	17.75	9.44	13.21	0	0
ILMN_2725548	Pqlc2	4	139	rs6234904	4	137.87	Y	Y	23.97	26.79	10.43	9.34	3		rs6234904	4	138.15	5.8	10.06	8.14	14.01	0	0
ILMN_2728088	Cda	4	138	rs6234904	4	137.87	Y	Y	21.87	20.01	32.08	27.08	11		rs6234904	4	138.15	7.32	9.65	1.76	4.72	0	0
ILMN_2777478	Nbl1	4	139	rs6234904	4	137.87	Y	Y	51.07	34.94	48.32	62.69	1		rs6234904	4	138.15	17.23	32.45	22.09	34.79	10	0
ILMN_1244242	Aldh4a1	4	139	rs13478015	4	138.43	Y	Y	22.62	34.29	28.4	30.79	15		rs13478015	4	138.71	17.33	18.63	14.97	9.07	0	0
ILMN_1212875	Arhgef19	4	141	mCV23723677	4	139.75	Y	Y	54.62	54.19	61.99	43.37	1		rs3724911	4	140.08	10.11	25.47	7.46	8.18	0	0
ILMN_1216950	C1orf144	4	141	mCV23723677	4	139.75	Y	Y	35.98	40.76	37.81	33.01	1		rs3724911	4	140.08	5.2	12.65	11.67	6.77	0	0
ILMN_1223381	Padi2	4	141	mCV23723677	4	139.75	Y	Y	54.39	46.92	43.39	48.7	1		rs3724911	4	140.08	8.28	25.61	15.92	14.31	0	0
ILMN_1239535	Plekhm2	4	141	mCV23723677	4	139.75	Y	Y	26.67	49.23	27.39	34.44	1		rs3724911	4	140.08	1.34	3.39	1.57	2.65	0	0
ILMN_1250227	Clcnka	4	141	mCV23723677	4	139.75	Y	Y	61.63	62.5	58.3	76.21	1		rs3724911	4	140.08	10.02	10.07	7.57	5.33	0	0
ILMN_1251972	Padi2	4	141	mCV23723677	4	139.75	Y	Y	75.47	66.27	53.73	68.37	1		rs3724911	4	140.08	8.7	14.32	11.67	5.38	0	0
ILMN_2529591	Gm694	4	141	mCV23723677	4	139.75	Y	Y	93.52	87.93	66	84.45	1		rs3724911	4	140.08	13.42	18.44	6.23	7.01	0	0
ILMN_2616522	Crocc	4	141	mCV23723677	4	139.75	Y	Y	103.7	107.85	88.04	105.8	1		rs3724911	4	140.08	16.39	22.13	13.29	6.73	0	0
ILMN_2626950	Spata21	4	141	mCV23723677	4	139.75	Y	Y	23.22	24.56	25.26	23.4	9		rs3724911	4	140.08	0.87	3.09	6.27	0.93	0	0
ILMN_2757283	Clcnkb	4	141	mCV23723677	4	139.75	Y	Y	55.48	78.79	44.27	57.2	1		rs3724911	4	140.08	8.18	10.82	1.69	1.68	0	0
ILMN_2774882	Necap2	4	141	mCV23723677	4	139.75	Y	Y	152.95	174.55	101.02	152.55	1		rs3724911	4	140.08	20.5	35.01	14.25	17.68	3	0
ILMN_1217061	Casp9	4	141	rs13478026	4	141.18	Y	Y	189.65	202.75	120.65	186.38	1		rs13478025	4	141.17	48.05	69.97	52.65	82.72	1	1
ILMN_1255180	Casp9	4	141	rs13478026	4	141.18	Y	Y	91.25	93.53	79.64	103.59	1		rs13478025	4	141.17	39.42	45.65	30.67	41.32	1	1
ILMN_3160727	Gm694	4	141	rs13478026	4	141.18	Y	Y	33.58	14.99	35.61	25.86	14		rs13478025	4	141.17	11.36	28	6.32	1.96	3	0
ILMN_1214137	Eno1	4	150	rs6217691	4	148.21	Y	Y	36.1	46.11	59.92	62.88	1		rs3669806	4	148.2	20.53	11.32	2.44	23.66	0	0
ILMN_1255527	Dffa	4	148	rs6217691	4	148.21	Y	Y	89.34	85.21	95.13	83.65	1		rs3669806	4	148.2	23.97	22.56	15.48	33.36	5	0
ILMN_2441501	Clstn1	4	149	rs6217691	4	148.21	Y	Y	30.34	24.07	27.75	33.31	1		rs3669806	4	148.2	0.53	0.57	1.16	2.47	0	0
ILMN_2502596	Nmnat1	4	149	rs6217691	4	148.21	Y	Y	67.78	57.82	47.01	44.21	1		rs3669806	4	148.2	0.84	2.06	3.4	0.07	0	0
ILMN_2630811	Rere	4	150	rs6217691	4	148.21	Y	Y	42.6	45.63	34.42	56.06	1		rs3669806	4	148.2	10.35	17.21	13.98	11.59	0	0
ILMN_2641431	Trak2	1	59	rs6217691	4	148.21	N	N	26.2	45.33	21.84	29.42	13		rs3669806	4	148.2	1.07	0.26	0.17	0.4	0	0
ILMN_2647921	Kif1b	4	149	rs6217691	4	148.21	Y	Y	57.58	39.71	37.05	45.12	1		rs3669806	4	148.2	4.02	0.01	0.93	0.92	0	0
ILMN_2654314	Kif1b	4	149	rs6217691	4	148.21	Y	Y	20	17.31	13.2	31.71	5		rs3669806	4	148.2	1.34	0.2	0.76	0.25	0	0
ILMN_2733708	Rbp7	4	149	rs6217691	4	148.21	Y	Y	2.31	15.14	14.06	27.94	5		rs3669806	4	148.2	0.31	2.32	0	0.07	0	0
ILMN_1231205	LOC230959	4	153	rs13478063	4	152.17	Y	Y	70.14	86.99	57.64	64.6	1		rs13478063	4	152.7	11.61	17.49	7.42	11	0	0
ILMN_2694092	Pomt1	2	32.1	rs13478063	4	152.17	N	N	2.33	2.54	8.54	25.7	5		rs13478063	4	152.7	1.42	0.29	0	0.15	0	0
ILMN_1242542	A530082C11Rik	4	155	rs13478069	4	154.35	Y	Y	20.71	25.87	21.97	32.25	10		rs13478069	4	154.88	0.7	0.62	2.06	0.94	0	0
ILMN_2446559	Tnfrsf4	4	155	rs3720634	4	154.75	Y	Y	25.42	8.04	25.21	13.35	7		rs3720634	4	155.28	30.01	43.5	27.04	29.07	1	0
ILMN_2687140	B3galt6	4	155	rs3720634	4	154.75	Y	Y	89.37	105.5	59.94	49.54	1		rs3720634	4	155.28	47.95	58.71	38.16	57.75	1	1
ILMN_1254958	9430015G10Rik	4	156	rs3693087	4	154.97	Y	Y	36.76	51.13	32.78	31.78	1		rs3693087	4	155.5	1.31	7.16	0.01	1.66	0	0
ILMN_2450460	Ube2j2	4	155	rs3693087	4	154.97	Y	Y	29.05	30.11	18.63	20.27	6		rs3693087	4	155.5	1.63	2.76	1.6	1.52	0	0
ILMN_2488783	B3galt6	4	155	rs3693087	4	154.97	Y	Y	46.08	63.86	43.83	60.66	1		rs3693087	4	155.5	20.01	15.04	18.82	12.66	0	0
ILMN_2645295	C1qdc2	4	155	rs3693087	4	154.97	Y	Y	52.34	66.47	65.48	49.28	1		rs3693087	4	155.5	10.63	9.27	4.76	3.54	0	0
ILMN_1216690	Samd11	4	1	rs6279100	4	155.03	Y	N	13.91	4.12	26.3	11.98	4		rs6279100	4	155.56	15.03	14.32	2.61	25.04	0	0
ILMN_1221451	Dhrsx	4	1	rs6279100	4	155.03	Y	N	70.49	69.43	72.25	67.92	1		rs6279100	4	155.56	37.6	40.48	32.97	30.26	1	1
ILMN_2628236	A330021E22Rik	5	5.58	CEL-5_3149134	5	3.15	Y	Y	11.45	20.25	16.97	32.88	5		CEL-5_3149134	5	3.14	1.37	3.02	0.08	5.05	0	0
ILMN_2688075	Cyp51	5	4.08	CEL-5_3149134	5	3.15	Y	Y	15.26	24.92	14.59	21.24	3		CEL-5_3149134	5	3.14	12.17	14.69	10.82	18.3	0	0
ILMN_1221520	Pftk1	5	5.01	D5Mit346	5	4.89	Y	Y	62.28	51.78	68.62	56.6	1		CEL-5_4604586	5	4.6	10.61	45.66	38.15	21.94	9	0
ILMN_2587975	Morc3	16	93.8	D5Mit346	5	4.89	N	N	0.01	29.05	0	0.39	3		CEL-5_4604586	5	4.6	0	0.37	3.79	0	0	0
ILMN_2714209	A330021E22Rik	5	5.58	D5Mit346	5	4.89	Y	Y	22.01	26.66	29.56	25.15	15		CEL-5_4604586	5	4.6	7.53	5.29	0.01	6.76	0	0
ILMN_1242665	1700016B15Rik	7	126	rs3714258	5	12.38	N	N	0.38	0.16	0.84	24.84	5		rs3714258	5	12.37	0.49	0.06	2.11	1.15	0	0
ILMN_1226441	Pclo	5	14.9	rs6353097	5	14.81	Y	Y	26.15	34.91	25.68	36.87	1		rs3687916	5	14.32	11.56	0.63	0.77	4.39	0	0
ILMN_2766604	Camp	9	110	rs6353097	5	14.81	N	N	24.29	0.04	0	2.06	2		rs3687916	5	14.32	0.43	0.61	1.24	0.14	0	0
ILMN_1242281	Txndc2	17	66	rs6366704	5	19.11	N	N	27.91	4.98	0.18	0.46	2		rs13478123	5	18.73	0.51	1.31	0.15	0.06	0	0
ILMN_1215964	Lhfpl3	5	22.6	rs6256752	5	20.76	Y	Y	37.23	20.41	16.16	22.93	2		rs6256752	5	20.75	0.06	0.54	6.51	1.9	0	0
ILMN_1235926	Rsbn1l	5	20.5	rs6256752	5	20.76	Y	Y	38.76	47.5	52.62	44.91	1		rs6256752	5	20.75	0	1.79	0.77	0.1	0	0
ILMN_1251250	Lhfpl3	5	22.8	rs6256752	5	20.76	Y	Y	43.89	32.25	41.32	28.7	1		rs6256752	5	20.75	3.3	0	1.84	0.27	0	0
ILMN_1215762	Xrcc2	5	25.2	rs6349956	5	24.38	Y	Y	32.3	24.43	7.21	14.41	6		petM-05233-3	5	24.39	15.28	18.04	14.67	13.37	0	0
ILMN_1252650	1500035N22Rik	5	24.5	rs6349956	5	24.38	Y	Y	52.13	82.35	62.59	57.17	1		petM-05233-3	5	24.39	25.24	24.81	19.16	29.78	5	0
ILMN_2700400	Galnt11	5	24.8	rs6349956	5	24.38	Y	Y	40.34	40.59	24.92	24.97	1		petM-05233-3	5	24.39	7.39	7.36	11.02	14.67	0	0
ILMN_2765080	Nub1	5	24.2	rs6349956	5	24.38	Y	Y	13.98	33.89	16.91	15.79	3		petM-05233-3	5	24.39	0.19	0.17	0.03	0.15	0	0
ILMN_2774572	Crygn	5	24.3	rs6349956	5	24.38	Y	Y	24.11	22.83	12.48	29.12	8		petM-05233-3	5	24.39	5.14	2.42	5.16	5.02	0	0
ILMN_3161626	Prkag2	5	24.4	rs6349956	5	24.38	Y	Y	78.01	91.27	81.24	66.24	1		petM-05233-3	5	24.39	31.45	61.19	46.23	43.1	1	1
ILMN_2726471	En2	5	28.5	rs13478155	5	27.73	Y	Y	15.28	37.3	25.45	19.04	9		CEL-5_24211033	5	25.3	0.06	0	1.82	1.57	0	0
ILMN_2454325	Prr8	5	28.7	rs13478157	5	28.66	Y	Y	62.71	45.74	55.33	48.59	1		CEL-5_24211033	5	25.3	0.1	0.05	0	0.35	0	0
ILMN_2539093	Dpp6	5	28	rs13478157	5	28.66	Y	Y	27.08	14.33	3.14	1.82	2		CEL-5_24211033	5	25.3	2.28	2.62	2.52	0	0	0
ILMN_2653444	Prr8	5	28.7	rs13478157	5	28.66	Y	Y	46.56	37.38	57.14	40.13	1		CEL-5_24211033	5	25.3	0.05	0.85	0.88	1.61	0	0
ILMN_1253323	D5Wsu178e	5	30.6	rs13478166	5	30.68	Y	Y	10.51	29.86	13.73	11.92	3		D5Mit388	5	33.66	0.02	0.41	0.63	1.35	0	0
ILMN_1255766	Sh3bp2	5	34.9	rs3658401	5	33.63	Y	Y	30.23	56.56	23.17	18.21	6		D5Mit388	5	33.66	2.45	2.01	0.73	0.05	0	0
ILMN_1217485	Rgs12	5	35.4	CEL-5_32275802	5	34.14	Y	Y	30.58	30.37	34.91	34.5	1		rs13478175	5	33.93	16.75	24.27	11.51	25.04	0	0
ILMN_2674032	Tmem128	5	38.7	CEL-5_32275802	5	34.14	Y	Y	25.9	21.49	41.68	12.89	7		rs13478175	5	33.93	0.16	1.86	1.07	1.99	0	0
ILMN_2760417	Mxd4	5	34.5	CEL-5_32275802	5	34.14	Y	Y	18.07	31.89	26.33	29.14	15		rs13478175	5	33.93	0.63	10.75	8.07	5.14	0	0
ILMN_1248235	Tmem128	5	38.7	rs3698586	5	37.22	Y	Y	66.06	65.28	57.58	43.17	1		rs4225178	5	36.81	0.11	0.94	0.13	1.65	0	0
ILMN_2644432	Drd5	5	38.7	rs3698586	5	37.22	Y	Y	21.08	27.83	20.87	28.18	10		rs4225178	5	36.81	0.45	1.03	0.12	1.69	0	0
ILMN_2690460	Jakmip1	5	37.5	rs3698586	5	37.22	Y	Y	30.3	45.44	37.03	40.08	1		rs4225178	5	36.81	0.45	0.22	0	0.05	0	0
ILMN_2690938	Evc2	5	37.8	rs3698586	5	37.22	Y	Y	66.07	74.12	78.74	59.41	1		rs4225178	5	36.81	0.29	0.05	1.87	0.34	0	0
ILMN_2769256	Bre	5	32.4	rs6324856	5	38.86	Y	N	0.02	27.26	0.8	3.3	3		rs3703261	5	40.03	0.47	0.12	0.62	0.12	0	0
ILMN_1224079	Wfs1	5	37.4	rs13478197	5	39.36	Y	Y	40.41	36.82	31.98	20.86	12		rs3703261	5	40.03	0.31	0.51	2.05	3.75	0	0
ILMN_1232381	Slit2	5	48.5	rs13478217	5	44.45	Y	Y	37.84	62.9	46.27	34.37	1		rs13478217	5	44.56	12.58	31.87	34.87	28.54	15	0
ILMN_1241892	Sod3	5	52.8	rs13478217	5	44.45	Y	N	41.04	59.01	29.78	31.53	1		rs13478217	5	44.56	0.52	0.4	0.29	0.28	0	0
ILMN_2530542	Gm447	5	52.8	rs13478217	5	44.45	Y	N	31.85	43.8	35.06	29.34	1		rs13478217	5	44.56	0.12	1.65	1.05	3.11	0	0
ILMN_2651582	9630031F12Rik	5	45.9	rs13478217	5	44.45	Y	Y	15.56	32.19	30.11	19.25	9		rs13478217	5	44.56	5.13	13.19	9.67	11.43	0	0
ILMN_2627217	Pi4k2b	5	53.2	rs3090699	5	52.8	Y	Y	17.07	35.25	29.3	24.69	15		rs3090699	5	52.91	2.92	10.06	3.84	2.4	0	0
ILMN_1217642	Centd1	5	63.1	rs6339023	5	58.46	Y	Y	59.36	64.77	72.77	59.67	1		rs6339023	5	58.57	0.44	0.84	0.64	0.02	0	0
ILMN_1242934	D830007B15Rik	5	67.7	rs6339023	5	58.46	Y	N	2.91	2.4	29.89	6.1	4		rs6339023	5	58.57	0.31	1.99	0.59	0.81	0	0
ILMN_1246298	Atp8a1	5	68	rs6339023	5	58.46	Y	N	29.93	16.52	2.85	8.43	2		rs6339023	5	58.57	1.58	0	0.28	3.61	0	0
ILMN_1239398	Tbc1d1	5	64.6	rs3711950	5	64.29	Y	Y	27.38	7.2	11.41	23.47	2		rs13478294	5	63.82	4.84	6.15	0.06	0.51	0	0
ILMN_2457854	B230308N11Rik	5	66	rs3711950	5	64.29	Y	Y	32.51	22.24	48.92	29.18	14		rs13478294	5	63.82	3.56	0.15	1.34	2.92	0	0
ILMN_2635700	Lgi2	5	52.9	rs3711950	5	64.29	Y	N	29.66	3.67	18.27	11.35	2		rs13478294	5	63.82	3.23	0.17	4.64	0.1	0	0
ILMN_2656645	Rell1	5	64.3	rs3711950	5	64.29	Y	Y	28.6	24.97	24.03	25.32	1		rs13478294	5	63.82	0.55	0.01	3.04	1.38	0	0
ILMN_1222716	Sgcb	5	74	rs13478309	5	67.43	Y	N	37.55	38.59	29.17	18.9	12		rs13478309	5	67.54	4.41	4.89	2.88	7.03	0	0
ILMN_1231010	Gabrb1	5	72.4	rs13478309	5	67.43	Y	N	35.9	36.86	30.24	44.68	1		rs13478309	5	67.54	4.57	15.85	3.13	3.39	0	0
ILMN_1255256	Sgcb	5	74	rs13478309	5	67.43	Y	N	39.64	47.53	33.63	28.78	1		rs13478309	5	67.54	5.06	8.48	1.54	7.72	0	0
ILMN_2509817	Atp8a1	5	68	rs13478309	5	67.43	Y	Y	59.9	65.15	63.7	47.22	1		rs13478309	5	67.54	5.42	11.63	12.49	14.94	0	0
ILMN_2686270	Slain2	5	73.4	rs13478309	5	67.43	Y	N	23.11	26.73	19.72	32.73	10		rs13478309	5	67.54	7.41	13.74	8.66	0.29	0	0
ILMN_1216287	C530008M17Rik	5	77.1	rs4225290	5	77.23	Y	Y	15.84	18.02	27.45	11.19	4		rs6222023	5	76.59	0.03	3.8	0.35	2	0	0
ILMN_2683222	Srd5a2l	5	76.6	rs4225290	5	77.23	Y	Y	19.68	25.14	32.51	27.49	15		rs6222023	5	76.59	30.77	54.39	17.43	34.53	13	0
ILMN_2747828	Exoc1	5	77	rs4225290	5	77.23	Y	Y	47.44	52.47	87.9	43.26	1		rs6222023	5	76.59	0.61	3.98	0.08	1.4	0	0
ILMN_1231684	Epha5	5	84.7	rs13478363	5	84.91	Y	Y	31.31	22.81	35.29	23.41	7		rs13478363	5	84.27	14.92	21.17	17.37	15.81	0	0
ILMN_2433635	AW125296	5	84.5	rs13478363	5	84.91	Y	Y	9.13	20.33	19.8	29.06	5		rs13478363	5	84.27	0.98	8.19	0.01	5.77	0	0
ILMN_1241171	Anxa3	5	97.3	rs3687494	5	89.18	Y	N	32.01	22.53	34.99	28.66	14		rs6167407	5	90.25	4.82	13.5	15.03	5.05	0	0
ILMN_1254526	Bmp2k	5	97.5	rs3687494	5	89.18	Y	N	25.74	35.7	29.75	32.66	1		rs6167407	5	90.25	19.5	28.4	6.68	21.63	3	0
ILMN_2663211	Stbd1	5	93	rs3687494	5	89.18	Y	Y	93.43	91.81	111.61	67.37	1		rs6167407	5	90.25	0	1.51	0.2	0.85	0	0
ILMN_2774370	Fras1	5	97.2	rs3687494	5	89.18	Y	N	30.42	30.48	35.12	17.26	12		rs6167407	5	90.25	9.44	7.73	19.04	11.4	0	0
ILMN_3162781	C230055K05Rik	5	105	rs3714102	5	102.13	Y	Y	16.73	27.91	27.94	15.86	9		rs13478424	5	102	7.3	1.51	8.28	1.93	0	0
ILMN_2659456	Zfp33b	5	105	D5Mit10	5	104.48	Y	Y	28.98	34.68	39.96	22.81	12		rs13478434	5	104.57	3.59	21.78	20.25	7.57	0	0
ILMN_2690603	Spp1	5	105	D5Mit10	5	104.48	Y	Y	15.63	23.7	30.33	43.68	11		rs13478434	5	104.57	20.28	22.85	18.86	10.04	0	0
ILMN_1225370	2410039M03Rik	8	20.2	rs13478446	5	107.43	N	N	49.86	72.6	76.27	53.73	1		rs13478446	5	107.62	2.63	0	0	0.58	0	0
ILMN_2652260	Rpap2	5	108	rs13478446	5	107.43	Y	Y	32.07	24.61	38.68	21.55	12		rs13478446	5	107.62	15.85	9.03	9.04	10.28	0	0
ILMN_2731908	ENSMUSG00000068116	5	109	rs13478446	5	107.43	Y	Y	6.64	15.28	9.91	28.92	5		rs13478446	5	107.62	5.45	0.01	0	0.05	0	0
ILMN_2737158	D5Ertd585e	5	111	rs13478446	5	107.43	Y	Y	55.97	65.19	77.73	50.54	1		rs13478446	5	107.62	0.24	0.98	0.22	0.08	0	0
ILMN_1254459	Ep400	5	111	rs3708939	5	110.82	Y	Y	25.66	20.17	30.96	21.92	7		rs13459088	5	111.08	2.67	3.88	7.77	3.25	0	0
ILMN_2644193	A630023P12Rik	5	111	rs3708939	5	110.82	Y	Y	39.63	34.32	50.08	32.85	1		rs13459088	5	111.08	15.72	6.86	5.07	1.34	0	0
ILMN_1236811	Fhl2	1	43.2	rs3655095	5	112.57	N	N	25.19	23.12	33.18	28.31	14		gnf05.106.456	5	112.77	0.01	0.13	0.04	0.08	0	0
ILMN_1242356	2010205O06Rik	5	113	rs3655095	5	112.57	Y	Y	53.88	45.25	60.21	43.75	1		gnf05.106.456	5	112.77	5.65	28.5	12.44	19.9	3	0
ILMN_1256771	Adrbk2	5	113	rs3655095	5	112.57	Y	Y	22.72	19.69	26.99	11.6	4		gnf05.106.456	5	112.77	3.86	28.34	6.2	9.19	3	0
ILMN_2692078	Sgsm1	5	114	rs3655095	5	112.57	Y	Y	14.8	22.38	25.42	32.27	11		gnf05.106.456	5	112.77	9.01	7	0.06	4.12	0	0
ILMN_1218042	LOC383483	5	8.03	rs13478473	5	114.47	Y	N	77.63	72.2	92.22	89.98	1		rs4225431	5	114.91	34.15	63.76	31.3	38.43	1	1
ILMN_1223290	ENSMUSG00000054123	5	115	rs13478473	5	114.47	Y	Y	82.52	72.21	83.02	83.38	1		rs4225431	5	114.91	36.77	72.22	54.64	70.99	1	1
ILMN_1225123	2610524H06Rik	5	115	rs13478473	5	114.47	Y	Y	17.06	33.34	20.47	26.47	10		rs4225431	5	114.91	0.89	1.91	2.71	0.45	0	0
ILMN_1236811	Fhl2	1	43.2	rs13478473	5	114.47	N	N	23.36	16.28	24.5	28.78	11		rs4225431	5	114.91	0.01	0.01	0.6	0.04	0	0
ILMN_1244594	Mvk	5	115	rs13478473	5	114.47	Y	Y	57.71	36.03	45.78	44.46	1		rs4225431	5	114.91	19.12	10.61	9.1	13.64	0	0
ILMN_1246061	LOC239727	5	15.2	rs13478473	5	114.47	Y	N	119.97	96.98	103.75	104.92	1		rs4225431	5	114.91	34.92	72	42.93	53.03	1	1
ILMN_2500434	1500011B03Rik	5	115	rs13478473	5	114.47	Y	Y	102.21	76.5	101.46	78.94	1		rs4225431	5	114.91	34.58	55.86	21.17	57.31	13	0
ILMN_2552783	Sppl3	5	115	rs13478473	5	114.47	Y	Y	33.85	13.88	17.56	16.35	2		rs4225431	5	114.91	4.5	3.45	5.37	2.42	0	0
ILMN_2620365	Alkbh2	5	115	rs13478473	5	114.47	Y	Y	59.82	36.11	41.77	60.33	1		rs4225431	5	114.91	17.21	38.26	31.11	36.57	15	0
ILMN_2749719	4930515G01Rik	5	115	rs13478473	5	114.47	Y	Y	48.1	45.74	36.92	35.4	1		rs4225431	5	114.91	0.65	2.16	0.3	0.15	0	0
ILMN_2591502	Taok3	5	118	mCV23798232	5	116.92	Y	Y	43.9	29.56	40.03	30.25	1		mCV23798232	5	117.11	3.41	7.63	0.79	8.55	0	0
ILMN_1214488	Pebp1	5	118	rs13478481	5	117.74	Y	Y	50.62	48.72	49.19	50.02	1		rs3662161	5	117.91	0.59	0	0.27	0.61	0	0
ILMN_1255447	2410131K14Rik	5	119	rs13478481	5	117.74	Y	Y	51.25	40.47	31.19	29.76	1		rs3662161	5	117.91	9.92	9.19	5.7	6.97	0	0
ILMN_2637203	Rfc5	5	118	rs13478481	5	117.74	Y	Y	34.41	35.51	39.16	34.18	1		rs3662161	5	117.91	20.41	18.63	19.82	10.76	0	0
ILMN_1220172	Ubc	5	126	rs13478508	5	125.63	Y	Y	69.4	55.06	70.16	66.45	1		rs3668379	5	125.38	5.44	6.67	1.89	1.98	0	0
ILMN_2588050	Ubc	5	126	rs13478508	5	125.63	Y	Y	73.49	56.61	69.97	80.63	1		rs3668379	5	125.38	4.37	11.23	0.56	2.18	0	0
ILMN_2648542	Olfr1444	19	12.9	rs13478508	5	125.63	N	N	1.42	0.43	0.11	27.96	5		rs3668379	5	125.38	0.15	0.01	0.29	0.64	0	0
ILMN_2458053	5930412G12Rik	5	129	rs13478521	5	128.64	Y	Y	84.35	84.85	76.11	87.23	1		rs13478521	5	128.83	0.7	0.36	0.77	0.18	0	0
ILMN_2773800	Mmp17	5	130	rs13478521	5	128.64	Y	Y	5.86	25.23	12.36	14.74	3		rs13478521	5	128.83	0.34	1.81	0.03	0.05	0	0
ILMN_1231098	Wbscr17	5	131	rs6329591	5	130.04	Y	Y	74.88	76.05	49.07	76.77	1		gnf05.124.386	5	130.85	0.6	2.56	0.99	0.1	0	0
ILMN_1250157	Auts2	5	132	rs6329591	5	130.04	Y	Y	37.14	44.79	27.96	43.38	1		gnf05.124.386	5	130.85	0	0.44	0	0.02	0	0
ILMN_2474553	Wbscr17	5	131	rs6329591	5	130.04	Y	Y	71.8	89.31	63.64	79.84	1		gnf05.124.386	5	130.85	0.68	0.51	0.35	0.69	0	0
ILMN_2758690	Mrps17	5	130	rs6329591	5	130.04	Y	Y	88.23	89.28	64.99	85.24	1		gnf05.124.386	5	130.85	0	0.53	0.39	0	0	0
ILMN_1218097	4921520G13Rik	5	145	rs6284348	5	143.88	Y	Y	109.25	114.92	106.04	95.57	1		rs6284348	5	144.38	35.82	45.06	16.61	50.72	13	0
ILMN_1216487	Trrap	5	146	CEL-5_142159968	5	144.94	Y	Y	62.79	75.64	64.1	78.98	1		mCV25009162	5	145.3	1.96	0.17	0.49	1.34	0	0
ILMN_1221410	Gpr12	5	147	CEL-5_142159968	5	144.94	Y	Y	25.83	44.95	26.49	14.87	12		mCV25009162	5	145.3	38.66	43.51	21.85	40.21	13	0
ILMN_2741629	Tmem130	5	146	CEL-5_142159968	5	144.94	Y	Y	16.77	19.2	9.27	32.48	5		mCV25009162	5	145.3	0	0	0.05	0.01	0	0
ILMN_2444616	Gtf3a	5	148	rs4225605	5	147.26	Y	Y	37.58	62.6	38.79	40.94	1		UT_5_145.838572	5	147.77	9.37	13.38	18.43	11.93	0	0
ILMN_2632187	Mtif3	5	148	rs4225605	5	147.26	Y	Y	40.79	48.99	52.6	31.13	1		UT_5_145.838572	5	147.77	10.01	17.16	6.56	8.71	0	0
ILMN_2670727	Gtf3a	5	148	rs4225605	5	147.26	Y	Y	17.37	39.13	17.85	10.21	3		UT_5_145.838572	5	147.77	6.89	14.43	3.16	6.13	0	0
ILMN_2460850	Pds5b	5	152	rs6198385	5	150.49	Y	Y	29.48	32.52	20.38	23.89	6		rs13478587	5	148.54	1.76	3.41	1.91	0.48	0	0
ILMN_2664319	Irf3	7	52.3	rs13478602	6	3.8	N	N	5.97	25.02	5.54	2.81	3		rs13478602	6	3.8	1.81	1.12	0.02	0.52	0	0
ILMN_1239806	Rpa3	6	8.21	UT_6_5.753943	6	5.98	Y	Y	71.34	71.42	62.89	63.51	1		rs6343757	6	5.98	34.56	24.01	21.53	35.33	8	0
ILMN_1245768	Ica1	6	8.58	UT_6_5.753943	6	5.98	Y	Y	21.84	37.64	21.2	33.3	10		rs6343757	6	5.98	18.03	34.12	20.76	19.42	3	0
ILMN_2453874	Sdcbp	4	6.32	UT_6_5.753943	6	5.98	N	N	25.02	5.06	2.81	7.66	2		rs6343757	6	5.98	0.06	1.41	0.21	0.22	0	0
ILMN_2515830	C1galt1	6	7.83	UT_6_5.753943	6	5.98	Y	Y	96.63	100.16	82.73	111.1	1		rs6343757	6	5.98	0.4	2.88	0.17	0.25	0	0
ILMN_1212648	4732496O08Rik	4	143	CEL-6_9567739	6	9.79	N	N	1.89	27.53	2.44	0.99	3		rs13478623	6	9.49	0.09	0.28	1.78	0.01	0	0
ILMN_1242571	Pkn3	2	30	CEL-6_9567739	6	9.79	N	N	24.13	0.75	0.51	6.4	2		rs13478623	6	9.49	0.51	2.73	1.27	1.3	0	0
ILMN_2664049	Mrpl38	11	116	CEL-6_9567739	6	9.79	N	N	5.25	24.16	2.26	4.19	3		rs13478623	6	9.49	0.63	0	0.35	0.3	0	0
ILMN_2666190	Rnpepl1	1	94.8	CEL-6_9567739	6	9.79	N	N	9.02	35.54	2.79	3.71	3		rs13478623	6	9.49	0.11	0.04	4.05	0.33	0	0
ILMN_2705655	1700030K09Rik	8	75	CEL-6_9567739	6	9.79	N	N	7.61	26.38	2.08	0.71	3		rs13478623	6	9.49	0.6	0.73	0.49	0.01	0	0
ILMN_2775586	Acadvl	11	69.8	CEL-6_9567739	6	9.79	N	N	4.2	25.44	0.43	1.26	3		rs13478623	6	9.49	0.43	0.42	2.61	0.26	0	0
ILMN_2605183	EG232599	6	17	rs13478640	6	15.74	Y	Y	55.44	65.79	52.2	52.38	1		rs13478641	6	16.01	27.97	38.56	29.2	42.09	1	1
ILMN_2644092	Aass	6	23	rs3710004	6	23.15	Y	Y	33.51	51.41	54.57	38.61	1		rs13478662	6	24.22	1.58	0.31	0.12	1.39	0	0
ILMN_2612096	Zc3hc1	6	30.3	rs13478677	6	27.9	Y	Y	24.68	20.59	9.95	25.47	8		rs13478683	6	29.13	1.17	0.12	2.9	0.82	0	0
ILMN_2638914	D330027H18Rik	6	29.1	rs13478677	6	27.9	Y	Y	141.04	119.52	131.02	113.02	1		rs13478683	6	29.13	31.58	78.39	38.52	53.69	1	1
ILMN_2650392	Rbm28	6	29.1	rs13478677	6	27.9	Y	Y	77.83	94.45	87.7	94.08	1		rs13478683	6	29.13	12.83	46.53	19.33	16.79	3	0
ILMN_2520582	Plxna4	6	32.1	rs13478687	6	29.91	Y	Y	56.64	44.77	34.13	49.61	1		rs13478687	6	29.91	2.22	7.56	9.42	1.62	0	0
ILMN_1219580	Chchd3	6	33	rs13478697	6	32.78	Y	Y	38.26	50.68	42.94	42.57	1		rs13478696	6	32.58	0.56	0.51	1.14	2.2	0	0
ILMN_2580180	Ptn	6	36.7	rs13478697	6	32.78	Y	Y	90.59	87.42	99.8	85.45	1		rs13478696	6	32.58	38.53	27.94	28.91	36.13	1	1
ILMN_2763434	Reps2	X	159	rs3023069	6	52.17	N	N	0.4	1.09	0.28	25.65	5		rs3023069	6	52.19	1.38	1.79	3.4	0.5	0	0
ILMN_1250752	Kif23	9	61.8	rs13478780	6	59.45	N	N	3.21	1.04	0.03	24.24	5		rs13478780	6	59.47	0.01	2.75	0.6	0.01	0	0
ILMN_1228040	Ptcd3	6	71.8	rs6246241	6	71.7	Y	Y	86.54	108.05	80.04	101.71	1		rs3673305	6	71.87	67.95	66.21	44.46	53.44	1	1
ILMN_1230860	Rpo1-4	6	71.9	rs6246241	6	71.7	Y	Y	132.7	119.83	114.71	130.42	1		rs3673305	6	71.87	65.3	56.64	40.21	42.41	1	1
ILMN_1232184	Ggcx	6	72.4	rs6246241	6	71.7	Y	Y	52.61	46.61	46.14	74.28	1		rs3673305	6	71.87	12.97	27.8	4.82	11.81	3	0
ILMN_1241237	Immt	6	71.8	rs6246241	6	71.7	Y	Y	41.9	58.83	42.93	42.6	1		rs3673305	6	71.87	6.3	5.5	9.46	12.19	0	0
ILMN_2499400	Vamp8	6	72.3	rs6246241	6	71.7	Y	Y	70.54	81.32	65.84	78.41	1		rs3673305	6	71.87	37.3	43.39	28.61	53.87	1	1
ILMN_2620069	Rpo1-4	6	71.9	rs6246241	6	71.7	Y	Y	99.17	100.01	79.75	100.33	1		rs3673305	6	71.87	34.5	60	46.45	30.09	1	1
ILMN_2748742	Rbed1	6	72.5	rs6246241	6	71.7	Y	Y	26.87	24.58	18.53	32.2	13		rs3673305	6	71.87	17.02	6.72	6.5	9.02	0	0
ILMN_2753924	Mrpl35	6	71.8	rs6246241	6	71.7	Y	Y	143.15	103.78	131.88	143.14	1		rs3673305	6	71.87	71.29	80.22	51.55	60.38	1	1
ILMN_2769680	Retsat	6	72.6	rs6246241	6	71.7	Y	Y	11.31	34.5	11.96	26.1	10		rs3673305	6	71.87	5.83	6.87	13.61	13.16	0	0
ILMN_2773113	Capg	6	72.5	rs6246241	6	71.7	Y	Y	53.89	52.37	43.38	54.96	1		rs3673305	6	71.87	6.47	3.38	3.82	5.17	0	0
ILMN_2553162	Lrrtm4	6	80.8	rs13478833	6	76.56	Y	Y	49.01	40.27	33.14	34.91	1		rs13478832	6	76.39	0.04	0.01	0.66	1.87	0	0
ILMN_2739027	Cml1	6	85.9	rs13478833	6	76.56	Y	N	50.47	48.85	56.02	51.29	1		rs13478832	6	76.39	4.36	1.33	7.99	5.42	0	0
ILMN_1218118	Tia1	6	86.4	CEL-6_86603542	6	86.24	Y	Y	135.26	124.44	136.21	137.69	1		CEL-6_86603542	6	86.22	54.78	56.67	39.53	45.49	1	1
ILMN_1225818	Tia1	6	86.4	CEL-6_86603542	6	86.24	Y	Y	39.03	48.27	39.4	40.12	1		CEL-6_86603542	6	86.22	24.7	47.39	20.75	34.3	10	0
ILMN_1232668	Mxd1	6	86.6	CEL-6_86603542	6	86.24	Y	Y	96.38	109.78	91.78	100.79	1		CEL-6_86603542	6	86.22	20.95	27.69	27.74	22.4	9	0
ILMN_2699923	Asprv1	6	86.6	CEL-6_86603542	6	86.24	Y	Y	38.07	44.47	26.92	35.59	1		CEL-6_86603542	6	86.22	1.9	9.24	10.37	14.39	0	0
ILMN_2676533	Alms1	6	85.8	rs13478878	6	87.72	Y	Y	30.84	11.76	12.97	8.58	2		rs13478876	6	87.38	2	0.04	0.88	2.14	0	0
ILMN_2624695	Chchd4	6	91.4	rs13478879	6	88.13	Y	Y	175.28	176.29	176.12	189.03	1		rs13478880	6	88.54	0.85	0.04	0.5	0.34	0	0
ILMN_1243932	Sec61a1	6	88.5	rs6330399	6	90.04	Y	Y	10.08	24.99	9.89	14.68	3		rs3661039	6	90.31	1.25	0.54	1.82	1.21	0	0
ILMN_2647533	Slc41a3	6	90.6	rs6330399	6	90.04	Y	Y	33.41	27.3	28.64	37.21	1		rs3661039	6	90.31	0.05	0.51	0.19	0.43	0	0
ILMN_2700408	Mgll	6	88.8	rs6330399	6	90.04	Y	Y	26	19.31	15.66	27	8		rs3661039	6	90.31	0.65	1.77	0.02	1.4	0	0
ILMN_1230157	Rnd3	2	51	rs6223362	6	92.59	N	N	0.17	2.43	0.02	25.99	5		rs6223362	6	92.57	0.69	2.11	0.07	1.4	0	0
ILMN_1256867	Slc25a26	6	94.6	rs6223362	6	92.59	Y	Y	12.69	6.03	26.49	4.62	4		rs6223362	6	92.57	6.13	3.64	0.64	1.13	0	0
ILMN_1257724	Adamts9	6	92.7	rs6223362	6	92.59	Y	Y	81.54	91.02	73.75	84.17	1		rs6223362	6	92.57	42.86	70.52	59.91	75.43	1	1
ILMN_2640862	Lrig1	6	94.6	gnf06.093.201	6	94.27	Y	Y	28.1	32.66	29.84	33.9	1		rs3659436	6	94.6	13.65	24.39	20.55	33.12	5	0
ILMN_1216539	Cml4	6	85.8	rs13478917	6	97.43	Y	N	3.47	3.88	28.44	4.23	4		rs13478917	6	97.42	0.25	1.18	1.89	0.07	0	0
ILMN_1240505	Zfp9	6	118	rs13478941	6	103.36	Y	N	82.94	88.84	94.98	69.19	1		gnf06.102.000	6	103.08	4.22	8.03	6.03	5.84	0	0
ILMN_1249378	Bhlhb2	6	109	rs13478941	6	103.36	Y	N	65.21	47.7	69.31	58.19	1		gnf06.102.000	6	103.08	14.63	31.58	24.12	14.42	3	0
ILMN_2684189	Grm7	6	111	rs13478941	6	103.36	Y	N	89.91	93.69	123.81	82.03	1		gnf06.102.000	6	103.08	16.95	26.04	18.87	17.07	3	0
ILMN_1252675	4833447P13Rik	6	108	rs3691330	6	104.14	Y	Y	31.38	18.45	31.2	4.5	7		rs13478947	6	104.79	11.98	16.97	3.23	9.94	0	0
ILMN_2613068	Cntn6	6	105	rs3691330	6	104.14	Y	Y	34.28	30.08	35.14	32.92	1		rs13478947	6	104.79	0.12	0.36	0.68	0.94	0	0
ILMN_1214740	Rpusd3	6	113	rs13478978	6	112.82	Y	Y	42.91	42.9	41.36	50.29	1		rs13478978	6	112.8	0.06	0.21	1.71	0.06	0	0
ILMN_1220712	Creld1	6	113	rs13478978	6	112.82	Y	Y	66.99	67.2	61	61.05	1		rs13478978	6	112.8	1.17	0.28	4	0.29	0	0
ILMN_1230357	Itpr1	6	109	rs13478978	6	112.82	Y	Y	9.25	21.82	37.14	28.2	11		rs13478978	6	112.8	3.16	3.03	2.3	2.12	0	0
ILMN_1236477	Ret	6	118	rs13478978	6	112.82	Y	N	30.24	35.05	34.77	32.26	1		rs13478978	6	112.8	7.45	5.44	3.38	5.22	0	0
ILMN_1238103	Ttll3	6	113	rs13478978	6	112.82	Y	Y	35.84	30.29	32.74	34.11	1		rs13478978	6	112.8	0.07	7.62	2.73	4.21	0	0
ILMN_1239573	Cacna1c	6	119	rs13478978	6	112.82	Y	N	40.4	31.72	42.01	39.58	1		rs13478978	6	112.8	0.22	0.09	0.74	0.23	0	0
ILMN_1254130	Itpr1	6	108	rs13478978	6	112.82	Y	Y	47.17	43.65	49.39	43.19	1		rs13478978	6	112.8	13.69	25.8	26.4	10.47	4	0
ILMN_1258543	1500001M20Rik	6	115	rs13478978	6	112.82	Y	Y	24.4	53.14	34.72	33.66	1		rs13478978	6	112.8	0.01	0.35	0.53	1.01	0	0
ILMN_1234857	Myoz2	3	123	gnf06.122.747	6	124.02	N	N	25.13	33.06	30.75	20.52	12		gnf06.122.747	6	124.01	1.2	0.29	2.74	0.16	0	0
ILMN_1237725	Arsj	3	126	gnf06.122.747	6	124.02	N	N	21.62	25.8	26.37	21.99	9		gnf06.122.747	6	124.01	0.01	0.42	0.4	0.04	0	0
ILMN_1239797	Pde5a	3	122	gnf06.122.747	6	124.02	N	N	19.33	21.37	30.96	13.04	4		gnf06.122.747	6	124.01	0.01	0.02	0.75	1.36	0	0
ILMN_1256354	Gclm	3	122	gnf06.122.747	6	124.02	N	N	6.27	25.16	14.09	17.26	3		gnf06.122.747	6	124.01	0.14	1.73	0	0.02	0	0
ILMN_2652572	Ing4	6	125	gnf06.122.747	6	124.02	Y	Y	40.74	56.53	60.8	47.05	1		gnf06.122.747	6	124.01	23.93	43.21	19.58	34.44	10	0
ILMN_2654822	Chd4	6	125	gnf06.122.747	6	124.02	Y	Y	15.37	31.56	27.68	15.81	9		gnf06.122.747	6	124.01	11.83	18.7	12.65	9.37	0	0
ILMN_1219146	Cops7a	6	125	gnf06.123.229	6	124.51	Y	Y	77.27	106.98	98.88	58.81	1		gnf06.122.747	6	124.01	36.28	61.84	26.89	28.04	1	1
ILMN_1234857	Myoz2	3	123	gnf06.123.229	6	124.51	N	N	26.05	34.15	29.14	21.13	12		gnf06.122.747	6	124.01	1.2	0.29	2.74	0.16	0	0
ILMN_1237725	Arsj	3	126	gnf06.123.229	6	124.51	N	N	22.38	26.16	23.75	21.05	3		gnf06.122.747	6	124.01	0.01	0.42	0.4	0.04	0	0
ILMN_1243179	Sec24d	3	123	gnf06.123.229	6	124.51	N	N	21.36	25.01	19.64	20.95	3		gnf06.122.747	6	124.01	0.01	0.32	0.34	0.26	0	0
ILMN_1247736	4933426K21Rik	6	122	gnf06.123.229	6	124.51	Y	Y	38.86	52.3	36.86	28.59	1		gnf06.122.747	6	124.01	0.03	1.44	0.04	0.25	0	0
ILMN_2602125	Acrbp	6	125	gnf06.123.229	6	124.51	Y	Y	16.12	27.3	24.74	21.03	9		gnf06.122.747	6	124.01	0.4	7.46	6.92	3.44	0	0
ILMN_2625747	Ncapd2	6	125	rs13479015	6	125.33	Y	Y	16.88	26.58	32.29	23.15	9		rs13479016	6	125.52	8.56	27.79	16.45	20.01	3	0
ILMN_2700166	Ccnd2	6	127	D6Mit368	6	127.61	Y	Y	41.75	53.09	45.9	30.79	1		rs13479023	6	127.39	11.11	26.1	25.42	4.21	3	0
ILMN_1214767	Tulp3	6	128	D6Mit135	6	128.8	Y	Y	39.04	63.81	50.08	31.04	1		rs3670851	6	128.52	17.1	26.02	32.48	29.75	15	0
ILMN_1260001	9630033F20Rik	6	127	D6Mit135	6	128.8	Y	Y	66.01	60.64	79.07	56.98	1		rs3670851	6	128.52	18.85	47.5	34.53	40.22	15	0
ILMN_2419051	2700089E24Rik	6	133	D6Mit135	6	128.8	Y	Y	10.67	40.17	31.87	21.29	9		rs3670851	6	128.52	23.64	11.3	4.27	11.88	0	0
ILMN_2531773	BC048546	6	128	D6Mit135	6	128.8	Y	Y	27.74	29.67	24.9	29.02	1		rs3670851	6	128.52	22.9	32.3	14.85	29.37	10	0
ILMN_2637165	2310001H17Rik	6	129	D6Mit135	6	128.8	Y	Y	25.63	32.11	35.84	43.57	1		rs3670851	6	128.52	0.48	0.81	0.35	3.62	0	0
ILMN_1252621	Itfg2	6	128	CEL-6_130920075	6	130.2	Y	Y	32.61	48.27	27.2	38.7	1		rs3662241	6	129.56	0.06	0.61	0.41	0	0	0
ILMN_2604501	Clec1a	6	129	CEL-6_130920075	6	130.2	Y	Y	37.78	15.62	9.45	17.68	2		rs3662241	6	129.56	0.08	2.13	0.61	0.3	0	0
ILMN_1213144	Wbp11	6	137	rs13479060	6	135.86	Y	Y	104.14	105.95	90.55	109.32	1		rs13479061	6	136	26.42	39.57	22.19	27.77	13	0
ILMN_1222767	H2afj	6	137	rs13479060	6	135.86	Y	Y	65.41	71.76	44.97	60.21	1		rs13479061	6	136	7.74	20.07	15.06	22.04	0	0
ILMN_2524980	H2afj	6	137	rs13479060	6	135.86	Y	Y	25.73	48.52	21.47	25.87	13		rs13479061	6	136	14.45	39.57	26.58	25.08	9	0
ILMN_2722213	Atf7ip	6	137	rs13479060	6	135.86	Y	Y	19.12	31.72	15.87	34.05	10		rs13479061	6	136	18.23	15.31	19.88	16.6	0	0
ILMN_2737090	Rps4y2	6	148	rs3089737	6	145.41	Y	Y	26.82	26.08	26.85	13.47	12		rs3089737	6	145.41	6.79	12.6	3.24	5.2	0	0
ILMN_2513570	AW123240	6	146	D6Mit15	6	146.39	Y	Y	30.38	37.45	40.1	26.7	1		rs3712253	6	146.69	36.04	31.41	16.58	30.42	13	0
ILMN_2773211	Kras	6	145	D6Mit15	6	146.39	Y	Y	54.56	47.78	61.25	44.98	1		rs3712253	6	146.69	5.39	1.9	4.85	9.44	0	0
ILMN_1214158	Prpf31	7	3.58	D7Mit340	7	4.23	Y	Y	19.67	25.09	21.16	23.63	3		rs13479126	7	12.78	2.36	7.87	0.24	2.02	0	0
ILMN_1214918	Rps9	7	148	D7Mit340	7	4.23	Y	N	31.66	43.3	27.36	27.75	1		rs13479126	7	12.78	6.4	8.84	7.17	14.05	0	0
ILMN_1215180	3300002P13Rik	7	1	D7Mit340	7	4.23	Y	Y	91.61	97.87	69.16	100.23	1		rs13479126	7	12.78	6.28	15.99	8.11	14.3	0	0
ILMN_1215466	Oscar	7	3.56	D7Mit340	7	4.23	Y	Y	126.4	110.67	99.13	133.53	1		rs13479126	7	12.78	7.58	17.85	16.8	14.65	0	0
ILMN_1216235	Kptn	7	16.7	D7Mit340	7	4.23	Y	N	106.37	113.23	91.39	76.32	1		rs13479126	7	12.78	39.29	42.01	36.95	44.23	1	1
ILMN_1225710	BC023179	7	7.16	D7Mit340	7	4.23	Y	Y	27.34	32.66	19.3	18.44	6		rs13479126	7	12.78	0.1	2.64	0.03	3.09	0	0
ILMN_1234196	6030458C11Rik	15	12.8	D7Mit340	7	4.23	N	N	24	22.91	24.22	22.66	7		rs13479126	7	12.78	0.05	0.55	0.93	0.91	0	0
ILMN_1236008	LOC243823	7	4.84	D7Mit340	7	4.23	Y	Y	42.95	48.39	41.44	41.53	1		rs13479126	7	12.78	3.29	7.45	3.75	5.7	0	0
ILMN_1252001	6430701C03Rik	7	7.17	D7Mit340	7	4.23	Y	Y	55.38	66.68	58.67	58.82	1		rs13479126	7	12.78	0.8	0.49	0.69	2.26	0	0
ILMN_2435822	Tmc4	7	3.62	D7Mit340	7	4.23	Y	Y	31.84	32.26	21.69	32.33	13		rs13479126	7	12.78	3.6	4.28	4.73	6.68	0	0
ILMN_2486945	Lair1	7	3.66	D7Mit340	7	4.23	Y	Y	35.45	33.64	28.41	25	1		rs13479126	7	12.78	0.16	0.39	0.41	0.69	0	0
ILMN_2588053	Rps9	7	3.66	D7Mit340	7	4.23	Y	Y	13.82	29.08	25.71	24.21	15		rs13479126	7	12.78	2.04	2.72	0.13	10.91	0	0
ILMN_2606540	D430041B17Rik	7	4.78	D7Mit340	7	4.23	Y	Y	29.91	38.94	23.24	30.71	13		rs13479126	7	12.78	0.63	2.77	2	0.28	0	0
ILMN_2625342	Leng4	7	3.63	D7Mit340	7	4.23	Y	Y	13.81	32	16.06	40.45	10		rs13479126	7	12.78	0.68	1.25	6.22	2.1	0	0
ILMN_2628175	Tsen34	7	3.65	D7Mit340	7	4.23	Y	Y	28.42	26.76	17.2	23.2	6		rs13479126	7	12.78	0.08	0.46	2.42	0.4	0	0
ILMN_2682928	Rai14	15	10.5	D7Mit340	7	4.23	N	N	13.25	25.6	15.97	8.58	3		rs13479126	7	12.78	0	0	0.87	0	0	0
ILMN_2687195	Zfp324	7	13.6	D7Mit340	7	4.23	Y	N	84.95	90.36	73.76	94	1		rs13479126	7	12.78	0	12.13	0.02	0.66	0	0
ILMN_2726595	Zfp446	7	13.6	D7Mit340	7	4.23	Y	N	124.83	133.75	92.86	108.35	1		rs13479126	7	12.78	0.01	2.48	0.16	5.79	0	0
ILMN_2732642	Kptn	7	16.7	D7Mit340	7	4.23	Y	N	73.95	69.74	50.09	71.74	1		rs13479126	7	12.78	24.87	36.74	27.96	27.32	15	0
ILMN_1252204	Sepw1	7	16.5	rs13479143	7	17.16	Y	Y	22.26	43.03	18.5	17.14	3		gnf07.011.425	7	17.81	0.94	3.91	1.04	0.91	0	0
ILMN_1228568	Irf2bp1	7	19.6	rs3689218	7	18.18	Y	Y	51.19	46.44	39.23	55.58	1		rs3023108	7	19.68	4.42	4.88	2.72	3.6	0	0
ILMN_1237061	Dmpk	7	19.7	rs3689218	7	18.18	Y	Y	36.9	51.57	48.32	25.71	1		rs3023108	7	19.68	9.6	37.12	6.86	18.9	3	0
ILMN_1253447	Dmwd	7	19.7	rs3689218	7	18.18	Y	Y	10.06	32.24	10.11	1.19	3		rs3023108	7	19.68	0.06	3.5	0.42	6.77	0	0
ILMN_2542237	Mill2	7	19.4	rs3689218	7	18.18	Y	Y	25.62	11.29	21.21	13.58	2		rs3023108	7	19.68	3.25	14.1	8.9	13.13	0	0
ILMN_2613415	Map3k10	7	28.5	rs3689218	7	18.18	Y	N	5.66	1.61	8.38	30.46	5		rs3023108	7	19.68	1	1.91	0.01	2.8	0	0
ILMN_2623531	Napa	7	16.7	rs3689218	7	18.18	Y	Y	24.63	20.57	16.07	15.26	2		rs3023108	7	19.68	2.65	5.97	8.45	11.8	0	0
ILMN_2645493	Pvrl2	7	20.3	rs3689218	7	18.18	Y	Y	29.08	13.9	7.91	8.9	2		rs3023108	7	19.68	0.09	1.29	0.01	0.18	0	0
ILMN_2711355	Dmwd	7	19.7	rs3689218	7	18.18	Y	Y	92.59	80.17	73.76	85.3	1		rs3023108	7	19.68	16.25	15.97	22.84	13.83	0	0
ILMN_2483633	Grik5	7	25.8	D7Mit154	7	20.4	Y	N	24.72	37.72	28.98	40.07	1		D7Mit57	7	20.28	0.27	2.5	0.3	1.49	0	0
ILMN_2607972	9130221H12Rik	7	26	CEL-7_13089324	7	24.06	Y	Y	25.7	41.62	35.09	22.93	12		CEL-7_13089324	7	25.14	1.06	2.08	1.08	1.25	0	0
ILMN_2621074	Ethe1	7	25.4	CEL-7_13089324	7	24.06	Y	Y	38.81	54.25	25.55	25.52	1		CEL-7_13089324	7	25.14	0.12	2.95	1.29	1.21	0	0
ILMN_1251040	Akt2	7	28.4	rs6168040	7	26.3	Y	Y	25.1	26.55	25.54	14.93	12		rs13479163	7	27.85	0.32	6.36	2.12	4.32	0	0
ILMN_2590034	Ltbp4	7	28.1	rs6168040	7	26.3	Y	Y	24.7	21.54	20.11	29.18	8		rs13479163	7	27.85	0.56	0.08	0.82	0.08	0	0
ILMN_2777087	Mia1	7	28	rs6168040	7	26.3	Y	Y	55.63	48.37	59.81	37.67	1		rs13479163	7	27.85	0.45	0.09	0.01	0.07	0	0
ILMN_1228169	Map3k10	7	28.5	CEL-7_17114061	7	27.86	Y	Y	28.12	30.3	29.39	36.57	1		rs13479163	7	27.85	0.04	0.91	0.54	0.31	0	0
ILMN_1237237	Ttc9b	7	28.4	CEL-7_17114061	7	27.86	Y	Y	26.72	20.53	18.32	14.73	2		rs13479163	7	27.85	0.2	0.73	0.09	1.01	0	0
ILMN_1245944	LOC233024	7	28.7	CEL-7_17114061	7	27.86	Y	Y	10.18	28.71	11.92	6.9	3		rs13479163	7	27.85	0.91	0.06	0.22	0.15	0	0
ILMN_1251402	Fbxo27	7	29.5	CEL-7_17114061	7	27.86	Y	Y	31.77	48.91	18.83	24.4	13		rs13479163	7	27.85	3.31	0	0.43	2.2	0	0
ILMN_1254734	Mrps12	7	29.5	CEL-7_17114061	7	27.86	Y	Y	72.98	81.54	75.59	65.85	1		rs13479163	7	27.85	0.11	0.03	1.27	0.22	0	0
ILMN_2599891	BC089491	7	29.1	CEL-7_17114061	7	27.86	Y	Y	45.29	55	44.82	22.04	12		rs13479163	7	27.85	0.56	0.07	1.25	0.61	0	0
ILMN_2615538	Med29	7	29.2	CEL-7_17114061	7	27.86	Y	Y	31.76	6.87	10.87	6.4	2		rs13479163	7	27.85	0.17	0.21	1.57	0.11	0	0
ILMN_2722290	C030039L03Rik	7	28.5	CEL-7_17114061	7	27.86	Y	Y	14.89	22.21	21.51	25.91	5		rs13479163	7	27.85	2.98	0.17	3.99	0.77	0	0
ILMN_2737738	Fbxo27	7	29.5	CEL-7_17114061	7	27.86	Y	Y	30.23	27.86	20.58	14.93	6		rs13479163	7	27.85	0.48	0.44	0.63	1.08	0	0
ILMN_2777706	Mrps12	7	29.5	CEL-7_17114061	7	27.86	Y	Y	65.38	81.83	58.35	49.47	1		rs13479163	7	27.85	0.3	0.24	0.6	0.96	0	0
ILMN_1214859	BC027344	7	30.6	rs3712359	7	28.6	Y	Y	28.75	28.71	36.79	25.06	1		rs4226520	7	30.57	32.68	56.52	31.58	36.19	1	1
ILMN_1226498	Eif3k	7	29.8	rs3712359	7	28.6	Y	Y	82.3	88.27	89.52	68.45	1		rs4226520	7	30.57	0.49	0.57	0	1.83	0	0
ILMN_1228808	Rasgrp4	7	29.9	rs3712359	7	28.6	Y	Y	47.21	49.15	62.71	57.24	1		rs4226520	7	30.57	0.1	1.3	0.46	0.8	0	0
ILMN_1252804	Map4k1	7	29.8	rs3712359	7	28.6	Y	Y	18.86	19.62	27.29	23.57	4		rs4226520	7	30.57	1.1	0	0.28	1.69	0	0
ILMN_2626235	Lgals4	7	29.6	rs3712359	7	28.6	Y	Y	27.52	19.15	28.82	33.55	14		rs4226520	7	30.57	0.02	0.51	1.07	0	0	0
ILMN_2730425	Ryr1	7	29.8	rs3712359	7	28.6	Y	Y	35.57	51.56	36.52	34.52	1		rs4226520	7	30.57	0.26	0.76	0.41	1.46	0	0
ILMN_2733073	Ryr1	7	29.8	rs3712359	7	28.6	Y	Y	34.68	41.29	36.92	33.52	1		rs4226520	7	30.57	0.31	2.38	0.28	1.23	0	0
ILMN_2735766	Zfp790	7	30.6	rs3712359	7	28.6	Y	Y	27.22	25.17	23.57	15.96	6		rs4226520	7	30.57	1.93	2.58	5.85	0.07	0	0
ILMN_1247404	Zfp420	7	30.7	rs6208019	7	29.62	Y	Y	36.88	39.02	41.76	28.97	1		rs4226520	7	30.57	16.67	13.09	12.21	6.21	0	0
ILMN_2484274	0610010E21Rik	7	31.1	rs6208019	7	29.62	Y	Y	56.76	71.44	62.23	55.06	1		rs4226520	7	30.57	0.65	3.88	6.72	0.54	0	0
ILMN_2490271	Zfp27	7	30.7	rs6208019	7	29.62	Y	Y	53.34	85.14	89.25	54.61	1		rs4226520	7	30.57	31.47	43.99	37.36	40.15	1	1
ILMN_2494041	A430042F24Rik	7	30.9	rs6208019	7	29.62	Y	Y	22.2	20.94	24.66	15.01	4		rs4226520	7	30.57	0.95	9.69	1.11	3.77	0	0
ILMN_2510971	EG330503	7	31	rs6208019	7	29.62	Y	Y	29.19	37.56	28.98	26.04	1		rs4226520	7	30.57	0.48	0.09	0.52	4.37	0	0
ILMN_2673599	Actn4	7	29.7	rs6208019	7	29.62	Y	Y	26.01	15.42	17.39	16.16	2		rs4226520	7	30.57	2.05	0.03	0.05	0.27	0	0
ILMN_1235574	2310022K01Rik	7	31.4	rs13479176	7	30.41	Y	Y	31.06	32.13	8.9	14.38	6		rs8251849	7	31.51	7.79	8.42	6.68	0.03	0	0
ILMN_2639386	Lgi4	7	31.9	rs13479176	7	30.41	Y	Y	17.06	23.46	28.32	16.58	4		rs8251849	7	31.51	0.04	0.25	0.22	2.63	0	0
ILMN_2745153	Ccdc123	7	36.2	rs3699705	7	34.78	Y	Y	47.28	55.25	53.14	50.66	1		rs3694031	7	35.7	4.02	22.7	4.8	1.53	0	0
ILMN_2746906	Nudt19	7	36.3	rs3699705	7	34.78	Y	Y	64.42	72.67	88.89	65.53	1		rs3694031	7	35.7	63.48	70.53	34.56	48.43	1	1
ILMN_2750402	Nudt19	7	36.3	rs3699705	7	34.78	Y	Y	47.53	75.33	60.63	47.62	1		rs3694031	7	35.7	46.59	50	37.74	34.74	1	1
ILMN_2743831	Pepd	7	35.8	rs4136084	7	36.05	Y	Y	0.35	3.18	29.98	4.55	4		rs4136084	7	37.12	0.22	0.34	0.26	0.75	0	0
ILMN_1220357	Zfp536	7	38.1	rs3720735	7	36.49	Y	Y	75.9	53.25	73.55	67.08	1		rs3720735	7	37.57	0.1	0.24	0.22	0.68	0	0
ILMN_1259746	D230003C14Rik	7	38.4	rs3720735	7	36.49	Y	Y	27.03	30.59	28.11	34.66	1		rs3720735	7	37.57	0.03	1.97	0.02	1.85	0	0
ILMN_2675223	Cd33	7	50.8	rs3720735	7	36.49	Y	N	26.23	10.59	20.42	18.54	2		rs3720735	7	37.57	3.74	0.27	2	0.61	0	0
ILMN_1214358	Akt1s1	7	52.1	D7Mit270	7	39.81	Y	N	39.56	24.58	23.7	24.99	13		D7Mit270	7	47.29	0.76	0.03	0.1	0	0	0
ILMN_1224505	Irf3	7	52.3	D7Mit270	7	39.81	Y	N	20.46	16	24.65	27.47	11		D7Mit270	7	47.29	3.28	0.42	0.86	0.35	0	0
ILMN_2667614	Josd2	7	51.7	D7Mit270	7	39.81	Y	N	8.61	25.94	18.06	16.67	3		D7Mit270	7	47.29	7.61	0	0.88	0.11	0	0
ILMN_3160881	Vrk3	7	52	D7Mit270	7	39.81	Y	N	32.98	38.95	40.1	29.76	1		D7Mit270	7	47.29	1.17	0.21	0.84	0.33	0	0
ILMN_1217519	Myh14	7	51.9	rs3675080	7	40.11	Y	N	39.83	67.45	66.36	51.84	1		rs3668040	7	47.56	2.96	0.21	1.34	7.55	0	0
ILMN_1219510	LOC381230	19	50.1	rs3675080	7	40.11	N	N	122.65	156.5	135.18	146.8	1		rs3668040	7	47.56	4.82	0.2	0.03	2.89	0	0
ILMN_1225133	Nosip	7	52.3	rs3675080	7	40.11	Y	N	57.29	69.17	60.91	56.42	1		rs3668040	7	47.56	1.52	0.08	0.08	3.03	0	0
ILMN_1230327	LOC383099	16	8.62	rs3675080	7	40.11	N	N	20.83	19.54	18.52	35.85	5		rs3668040	7	47.56	2.52	0.01	0.03	0.19	0	0
ILMN_1233884	Prr12	7	52.3	rs3675080	7	40.11	Y	N	36.72	42.22	10.81	28.14	13		rs3668040	7	47.56	2.24	1.04	0.11	0.36	0	0
ILMN_1236746	Fuz	7	52.2	rs3675080	7	40.11	Y	N	99.19	110	114.21	110.08	1		rs3668040	7	47.56	4.98	8.2	2.49	11.18	0	0
ILMN_1237313	1700021P22Rik	7	51.8	rs3675080	7	40.11	Y	N	100.49	108.62	103.94	98.91	1		rs3668040	7	47.56	14	14.46	8.4	12.74	0	0
ILMN_1237797	LOC210507	17	43.7	rs3675080	7	40.11	N	N	9.36	27.21	21.08	20.83	3		rs3668040	7	47.56	0.29	4.62	0.12	0.02	0	0
ILMN_1238830	Slc6a16	7	52.5	rs3675080	7	40.11	Y	N	83.43	91.22	91.65	96.05	1		rs3668040	7	47.56	3.73	7.2	6.75	0.41	0	0
ILMN_1243826	Plekha4	7	52.8	rs3675080	7	40.11	Y	N	17.69	16.64	29.39	14.63	4		rs3668040	7	47.56	0	5.53	1.47	3.79	0	0
ILMN_1248518	0610012D14Rik	7	51.7	rs3675080	7	40.11	Y	N	82.77	73.42	90.85	82.57	1		rs3668040	7	47.56	2.65	10.22	0.77	9.32	0	0
ILMN_1251254	Gys1	7	52.7	rs3675080	7	40.11	Y	N	73.71	74.23	60.03	79.06	1		rs3668040	7	47.56	0.32	0.21	0.79	0.09	0	0
ILMN_1254219	Klk9	7	51.2	rs3675080	7	40.11	Y	N	28.49	11.51	10.28	9.43	2		rs3668040	7	47.56	7.58	4.2	0.95	0.29	0	0
ILMN_1255686	Saal1	7	53.9	rs3675080	7	40.11	Y	N	26.35	27.96	29.92	37.91	1		rs3668040	7	47.56	0.08	0.14	2.12	1.23	0	0
ILMN_1256452	Saal1	7	53.9	rs3675080	7	40.11	Y	N	49.96	58.44	57.3	49.14	1		rs3668040	7	47.56	2.57	0.07	0.17	0.9	0	0
ILMN_2506907	Saal1	7	53.9	rs3675080	7	40.11	Y	N	57.33	40.37	37.45	32.72	1		rs3668040	7	47.56	2.04	0.01	1.29	0.54	0	0
ILMN_2512297	Trpm4	7	52.6	rs3675080	7	40.11	Y	N	75.32	63.71	72.83	67.52	1		rs3668040	7	47.56	2.05	0.89	0.03	3.2	0	0
ILMN_2581402	Pnkp	7	52.1	rs3675080	7	40.11	Y	N	60.24	60.43	55.09	52.72	1		rs3668040	7	47.56	1.93	4.47	0.99	0	0	0
ILMN_2588556	Zfp715	7	50.6	rs3675080	7	40.11	Y	N	65.03	68.99	82.38	69.33	1		rs3668040	7	47.56	9.47	22.07	9.51	12.73	0	0
ILMN_2598318	Lin7b	7	52.6	rs3675080	7	40.11	Y	N	19.56	29.56	25.39	22.88	9		rs3668040	7	47.56	0.99	0.05	1.34	0.15	0	0
ILMN_2603147	1700008O03Rik	7	51.6	rs3675080	7	40.11	Y	N	7.66	9.54	26.02	12.53	4		rs3668040	7	47.56	1.96	0.14	0.49	0.06	0	0
ILMN_2618244	Slc17a7	7	52.4	rs3675080	7	40.11	Y	N	85.78	80.44	69.41	81.69	1		rs3668040	7	47.56	0.24	7.38	1.24	0.01	0	0
ILMN_2621268	D7Ertd413e	7	54.3	rs3675080	7	40.11	Y	N	49.29	26.32	33.46	53.43	1		rs3668040	7	47.56	0	1.25	0.91	1.26	0	0
ILMN_2621588	Nosip	7	52.3	rs3675080	7	40.11	Y	N	98.03	84.92	99.59	102.85	1		rs3668040	7	47.56	1.78	0.74	0.02	0.23	0	0
ILMN_2637811	Gtf2h1	7	54.1	rs3675080	7	40.11	Y	N	45.53	57.52	47.95	68.3	1		rs3668040	7	47.56	0.16	0.1	1.85	0.94	0	0
ILMN_2658804	Rras	7	52.3	rs3675080	7	40.11	Y	N	32.65	29.42	41.97	31.15	1		rs3668040	7	47.56	0.97	0.04	1.01	0.47	0	0
ILMN_2675232	Klk8	7	51.1	rs3675080	7	40.11	Y	N	35.26	40.25	29.67	37.38	1		rs3668040	7	47.56	5.25	4.92	2	3.48	0	0
ILMN_2686353	Sult2b1	7	53	rs3675080	7	40.11	Y	N	24.3	22.55	30.17	14.95	7		rs3668040	7	47.56	7.79	11.35	7.32	4.1	0	0
ILMN_2696270	Pnkp	7	52.1	rs3675080	7	40.11	Y	N	53.34	62.9	70.07	57.64	1		rs3668040	7	47.56	0.08	0.2	0.41	0.01	0	0
ILMN_2705196	BC043301	7	50.8	rs3675080	7	40.11	Y	N	68.66	69.05	57.43	70.47	1		rs3668040	7	47.56	5.47	14.15	9.54	16.06	0	0
ILMN_2707834	Rpl13a	7	52.4	rs3675080	7	40.11	Y	N	86.84	72.6	77.69	90.3	1		rs3668040	7	47.56	1.34	2.25	0.52	0.39	0	0
ILMN_2717814	Kcnc1	7	53.7	rs3675080	7	40.11	Y	N	10.01	24.18	8.5	20.05	3		rs3668040	7	47.56	0.03	0.94	2.66	0.41	0	0
ILMN_2719620	Pnkp	7	52.1	rs3675080	7	40.11	Y	N	61.66	60.54	54.03	59.64	1		rs3668040	7	47.56	2.53	2.12	0.25	2.89	0	0
ILMN_2722938	Myd116	7	52.8	rs3675080	7	40.11	Y	N	42.73	32.82	52.46	41.82	1		rs3668040	7	47.56	1.55	0.43	0.01	0.08	0	0
ILMN_2723718	Rcn3	7	52.3	rs3675080	7	40.11	Y	N	38.62	34.89	31.16	36.64	1		rs3668040	7	47.56	2.59	0.5	1.49	0.38	0	0
ILMN_2733778	Il4i1	7	52.1	rs3675080	7	40.11	Y	N	28.49	40	42.36	23.35	12		rs3668040	7	47.56	0.9	0.42	2.42	0.24	0	0
ILMN_2734560	Cpt1c	7	52.2	rs3675080	7	40.11	Y	N	46.97	48.93	71.71	46.32	1		rs3668040	7	47.56	0.03	0.28	0	0.31	0	0
ILMN_2740006	Hps5	7	54	rs3675080	7	40.11	Y	N	58.36	93.67	70.67	82.72	1		rs3668040	7	47.56	0.33	4.43	1.57	0.74	0	0
ILMN_2775176	Klk6	7	51.1	rs3675080	7	40.11	Y	N	43.65	41.35	44.09	50.98	1		rs3668040	7	47.56	1.7	8.52	4.67	4.78	0	0
ILMN_3161591	Uevld	7	54.2	rs3675080	7	40.11	Y	N	36.93	37.64	31.95	13.55	12		rs3668040	7	47.56	0	0.3	0.39	0.24	0	0
ILMN_1217804	Ptpn5	7	54.3	rs6186772	7	46.98	Y	N	44.45	29.92	35.72	51.95	1		rs8260975	7	53.68	1.22	3.23	0.03	0.92	0	0
ILMN_1234086	Dhdh	7	52.7	rs6186772	7	46.98	Y	N	30.02	37.54	24.54	39.93	1		rs8260975	7	53.68	0.33	1.94	0.28	1.27	0	0
ILMN_2473666	4921540A03Rik	7	51.8	rs6186772	7	46.98	Y	Y	7.09	25.03	10.67	6.21	3		rs8260975	7	53.68	0.06	1.76	1.52	0.54	0	0
ILMN_2584798	Shank1	7	51.6	rs6186772	7	46.98	Y	Y	36.66	42.49	36.12	41.43	1		rs8260975	7	53.68	1.93	9.17	6.64	1.48	0	0
ILMN_2675595	Tmem143	7	53.2	rs6186772	7	46.98	Y	N	24.16	13.52	17.65	35.33	8		rs8260975	7	53.68	1.82	3.15	0.29	0.16	0	0
ILMN_1225563	Gas2	7	59.3	rs13479234	7	47.93	Y	N	11.74	12.27	6.85	27.97	5		CEL-7_36442524	7	56.25	0.07	2.65	0	3.82	0	0
ILMN_1253242	Bai2	4	130	rs13479239	7	50.12	N	N	17.75	26.8	15.52	14.6	3		rs3090660	7	57.6	1.27	3.63	1.68	0.8	0	0
ILMN_2690410	Ruvbl2	7	52.7	CEL-7_38246551	7	50.67	Y	Y	17.55	26.54	10.12	9.25	3		rs3090660	7	57.6	0.03	0.46	1.65	0.23	0	0
ILMN_2708949	1110032A03Rik	9	50.6	CEL-7_38246551	7	50.67	N	N	24.65	2.74	2.57	3.76	2		rs3090660	7	57.6	1.87	0.01	0.95	2.38	0	0
ILMN_2763588	Nell1	7	57.8	CEL-7_38246551	7	50.67	Y	N	18.08	24.63	6.21	16.49	3		rs3090660	7	57.6	1.29	0.02	1.41	0	0	0
ILMN_1241459	Cyfip1	7	63.2	gnf07.047.821	7	53.32	Y	N	31.69	28.64	19.43	37.35	13		rs13479253	7	60.13	0.41	1.1	0.15	2.93	0	0
ILMN_1244923	Apba2	7	71.9	gnf07.047.821	7	53.32	Y	N	25.09	17.62	14.32	18.81	2		rs13479253	7	60.13	4.22	9.28	0.04	4.97	0	0
ILMN_1256309	Luzp2	7	62.5	gnf07.047.821	7	53.32	Y	N	9.16	29.32	13.52	20.35	3		rs13479253	7	60.13	0.59	1.49	8	0.15	0	0
ILMN_1258904	Cyfip1	7	63.1	gnf07.047.821	7	53.32	Y	N	66.16	62.95	65.45	56.43	1		rs13479253	7	60.13	2.03	7.66	5.76	10.68	0	0
ILMN_2475689	Oca2	7	63.8	gnf07.047.821	7	53.32	Y	N	62.22	72.89	55.02	42.95	1		rs13479253	7	60.13	0.42	0.02	2.39	3.52	0	0
ILMN_2544126	Prmt3	7	57	gnf07.047.821	7	53.32	Y	Y	31.65	26.36	26.46	28.68	1		rs13479253	7	60.13	22.25	7.55	14.91	21.51	0	0
ILMN_2636266	Dmn	7	74.9	gnf07.047.821	7	53.32	Y	N	32.73	28.89	31.67	27.68	1		rs13479253	7	60.13	5.35	7.93	2.73	9.9	0	0
ILMN_2705349	Nipa1	7	63.2	gnf07.047.821	7	53.32	Y	N	59.25	79.4	66.52	61.64	1		rs13479253	7	60.13	16.2	10.08	24.56	27.81	5	0
ILMN_1214090	H47	7	73.2	rs3696018	7	56.98	Y	N	64.05	69.8	61.7	55.36	1		gnf07.050.858	7	63.78	7.91	19.46	0.22	14.89	0	0
ILMN_1219777	Lrrk1	7	73.4	rs3696018	7	56.98	Y	N	13.29	25.94	6.88	22.1	3		gnf07.050.858	7	63.78	5.59	2.95	0.31	0.72	0	0
ILMN_1237578	Aldh1a3	7	73.6	rs3696018	7	56.98	Y	N	44.21	65.76	57.49	65.68	1		gnf07.050.858	7	63.78	13.73	14.39	14.12	16.42	0	0
ILMN_1240151	Depdc1a	7	64.7	rs3696018	7	56.98	Y	N	25.4	8.24	14.59	8.53	2		gnf07.050.858	7	63.78	4.13	4.46	2.21	3.16	0	0
ILMN_1255861	Gabrb3	7	65.1	rs3696018	7	56.98	Y	N	59.93	55.27	45.89	49.69	1		gnf07.050.858	7	63.78	31.91	40.58	26.39	35.69	1	1
ILMN_1256701	Kbtbd11	8	15	rs3696018	7	56.98	N	N	26.37	0.8	0	2.8	2		gnf07.050.858	7	63.78	3.59	2.21	0.3	6.36	0	0
ILMN_2599953	Gabrg3	7	64.4	rs3696018	7	56.98	Y	N	136.82	111.57	135.12	111.97	1		gnf07.050.858	7	63.78	3.45	16.94	15.96	2.82	0	0
ILMN_2608574	Tm2d3	7	72.8	rs3696018	7	56.98	Y	N	21.16	20.75	27.66	25.57	11		gnf07.050.858	7	63.78	9.92	5.9	7.58	11.08	0	0
ILMN_2637094	Pcsk6	7	73.2	rs3696018	7	56.98	Y	N	51.93	34.62	21.41	36.13	13		gnf07.050.858	7	63.78	6.74	4.65	1.61	5.84	0	0
ILMN_2696537	Tm2d3	7	72.8	rs3696018	7	56.98	Y	N	43.78	61.77	45.29	35.73	1		gnf07.050.858	7	63.78	11.89	34.21	8.78	14.99	3	0
ILMN_2701515	Lrrk1	7	73.4	rs3696018	7	56.98	Y	N	18.42	32.17	32.55	29.49	15		gnf07.050.858	7	63.78	5.73	2.36	7.09	2.19	0	0
ILMN_2712557	H47	7	73.2	rs3696018	7	56.98	Y	N	59.5	59.02	42.17	69.82	1		gnf07.050.858	7	63.78	5.02	18.11	0.67	9.89	0	0
ILMN_1248388	9130422H11Rik	8	12.9	rs3698065	7	67.99	N	N	6.26	24.2	2.39	0.13	3		rs3698065	7	75.26	0.22	0.57	2.74	0.77	0	0
ILMN_2648170	Pdcd2	17	15.7	rs3698065	7	67.99	N	N	10.68	24.64	2.67	0.38	3		rs3698065	7	75.26	0.18	0.26	0.01	0.03	0	0
ILMN_1223978	Sema4b	7	87.4	rs3684797	7	75.63	Y	N	13.2	14.26	15.13	28.44	5		rs13479342	7	82.11	3.86	14.05	0	11.01	0	0
ILMN_1217241	Klhl25	7	83	rs6360431	7	81.95	Y	Y	52.36	55.11	45.12	62.48	1		rs6360431	7	89.22	33.24	25.93	20.12	42.44	8	0
ILMN_1226901	Man2a2	7	87.5	rs6360431	7	81.95	Y	N	72.82	59.73	69.34	71.43	1		rs6360431	7	89.22	5.85	18.76	14.91	14.49	0	0
ILMN_1239333	Iqgap1	7	87.9	rs6360431	7	81.95	Y	N	28.43	15.14	15.32	28.68	8		rs6360431	7	89.22	11.98	12.88	5.59	10	0	0
ILMN_1245903	Hdgfrp3	7	89	rs6360431	7	81.95	Y	N	30.72	30.22	37.86	40.13	1		rs6360431	7	89.22	20.19	18.62	3.95	19.6	0	0
ILMN_1252364	Furin	7	87.5	rs6360431	7	81.95	Y	N	33.07	38.59	24.92	35.32	1		rs6360431	7	89.22	8.7	8.15	10.52	8.14	0	0
ILMN_2481117	Man2a2	7	87.5	rs6360431	7	81.95	Y	N	24.35	21.37	17.25	30.09	8		rs6360431	7	89.22	0	2.9	0.67	0.26	0	0
ILMN_1215172	Folh1	7	93.9	gnf07.077.456	7	82.91	Y	N	109.04	107.26	109.16	110.86	1		gnf07.077.456	7	90.19	8.18	8.68	2.36	11.17	0	0
ILMN_2614494	Fah	7	91.7	gnf07.077.456	7	82.91	Y	N	48.71	43.4	41.15	45.64	1		gnf07.077.456	7	90.19	5.77	6.52	10.68	11.92	0	0
ILMN_1230097	LOC384721	7	98.3	rs6180537	7	87.12	Y	N	53.95	25.76	25.9	43.42	1		rs6394492	7	94.38	3.28	0.33	5.62	3.57	0	0
ILMN_1246132	E230029C05Rik	7	97.2	rs6180537	7	87.12	Y	N	38.66	26.74	28.96	28.76	1		rs6394492	7	94.38	8.89	21.13	17.95	16.51	0	0
ILMN_1253609	ENSMUSG00000039373	7	97.1	rs6180537	7	87.12	Y	N	36.21	23.39	5.43	14.97	2		rs6394492	7	94.38	3.23	12.62	0.05	2.62	0	0
ILMN_1256018	Sytl2	7	97.5	rs6180537	7	87.12	Y	N	17	18.24	18.98	24.59	5		rs6394492	7	94.38	2.24	7.51	0.05	2.15	0	0
ILMN_1259294	Tmem126b	7	97.6	rs6180537	7	87.12	Y	N	87.98	101.24	86.35	101.84	1		rs6394492	7	94.38	10.59	22.35	14.03	13.15	0	0
ILMN_1235788	EG384719	7	97.2	rs13479402	7	92.06	Y	N	3.31	14.56	26.93	7.5	4		rs4139557	7	99.56	3.53	2.31	7.14	0.77	0	0
ILMN_2639155	Prcp	7	100	rs13479402	7	92.06	Y	N	156.73	151.11	146.99	148.99	1		rs4139557	7	99.56	0.83	4.71	0	0.13	0	0
ILMN_1218834	A130089L14Rik	7	105	rs6279696	7	93.56	Y	N	26.28	34.26	35.92	22.81	12		rs4226783	7	100.08	15.88	15.01	10.2	1.61	0	0
ILMN_1228116	Nars2	7	104	rs6279696	7	93.56	Y	N	51.03	42.28	47.48	33.17	1		rs4226783	7	100.08	3.6	5.13	8.14	9.24	0	0
ILMN_1237963	Alg8	7	105	rs6279696	7	93.56	Y	N	59.26	67.92	86.77	60.9	1		rs4226783	7	100.08	2.29	8.07	4.04	9.13	0	0
ILMN_1241088	Nars2	7	104	rs6279696	7	93.56	Y	N	130.4	125.49	141.13	143.25	1		rs4226783	7	100.08	31.11	38.95	22.97	41.08	13	0
ILMN_1256775	Thrsp	7	105	rs6279696	7	93.56	Y	N	55.63	50.68	55.55	62.28	1		rs4226783	7	100.08	11.56	13.84	3.75	12.6	0	0
ILMN_2649083	Clns1a	7	105	rs6279696	7	93.56	Y	N	35.75	31.84	28.72	28.09	1		rs4226783	7	100.08	0	2.75	2.47	0.32	0	0
ILMN_2658182	Rsf1	7	105	rs6279696	7	93.56	Y	N	117.98	140.67	122.73	135.06	1		rs4226783	7	100.08	21.78	28.24	22.61	27.08	10	0
ILMN_2673332	Tsku	7	106	rs6279696	7	93.56	Y	N	45.75	33.44	30.77	33.08	1		rs4226783	7	100.08	0.03	19.92	1.5	2.38	0	0
ILMN_2681057	Phca	7	105	rs6279696	7	93.56	Y	N	25.72	13.67	25.09	26.08	14		rs4226783	7	100.08	2.84	9.51	1.33	0	0	0
ILMN_3162820	Odz4	7	104	rs6279696	7	93.56	Y	N	104.7	92.37	100.88	86.52	1		rs4226783	7	100.08	8.08	18.92	9.37	17.21	0	0
ILMN_1225901	Aqp11	7	105	rs8281437	7	98	Y	N	73.17	63.1	49.62	84.63	1		rs8281437	7	105.27	16.44	29.83	15.91	40.05	10	0
ILMN_1229075	A630032F01Rik	7	105	rs8281437	7	98	Y	N	24.08	27.33	10.26	25.56	13		rs8281437	7	105.27	5.97	5.87	2.78	2.36	0	0
ILMN_1258963	1700029M20Rik	4	135	rs8281437	7	98	N	N	33.01	7	17.02	12.19	2		rs8281437	7	105.27	3.59	0.18	3.59	0.14	0	0
ILMN_2758440	Gab2	7	104	rs8281437	7	98	Y	N	22.36	18.19	28.48	13.84	4		rs8281437	7	105.27	0.83	0.18	4.32	2.74	0	0
ILMN_1229853	Arrb1	7	107	rs6276149	7	98.32	Y	N	12.72	27.24	24.47	13.41	9		rs8281437	7	105.27	6.69	2.53	1.5	2.43	0	0
ILMN_2594076	2810406K13Rik	7	107	rs6276149	7	98.32	Y	N	73.3	53.39	46.55	69.66	1		rs8281437	7	105.27	16.79	30.44	20.9	32.25	10	0
ILMN_2619707	Slco2b1	7	107	rs6276149	7	98.32	Y	N	18.54	31.59	24.51	15.96	9		rs8281437	7	105.27	0.22	0.54	0.18	0.24	0	0
ILMN_2740407	Pde2a	7	109	rs6276149	7	98.32	Y	N	24.8	28.01	25.95	23.74	12		rs8281437	7	105.27	1.08	0.83	9.53	3.52	0	0
ILMN_2753077	Arrb1	7	107	rs6276149	7	98.32	Y	N	56.39	52.13	63.29	58.02	1		rs8281437	7	105.27	33.76	40.13	37.32	43.84	1	1
ILMN_1216122	Mrpl48	7	108	rs4226829	7	100.35	Y	N	98.24	90.68	102.65	106.67	1		rs4226829	7	107.63	41.08	39.92	28.59	60.03	1	1
ILMN_1219915	Dgat2	7	106	rs4226829	7	100.35	Y	N	28.89	7.6	17.91	2.63	2		rs4226829	7	107.63	3.63	3.31	7.33	2.66	0	0
ILMN_1233970	Arrb1	7	107	rs4226829	7	100.35	Y	N	19.64	29.85	31.48	28.88	15		rs4226829	7	107.63	18.21	14.15	21.39	23.55	0	0
ILMN_1236131	Mrpl48	7	108	rs4226829	7	100.35	Y	N	35.88	64.24	51.81	47.79	1		rs4226829	7	107.63	23.99	30	17.25	45.82	10	0
ILMN_1254943	Gdpd5	7	107	rs4226829	7	100.35	Y	N	6.35	24.23	20.34	29.92	10		rs4226829	7	107.63	0.86	1.64	0.03	2.38	0	0
ILMN_2521686	2210018M11Rik	7	106	rs4226829	7	100.35	Y	N	13.77	10.22	17.86	26.71	5		rs4226829	7	107.63	0.01	3.11	2.27	0.35	0	0
ILMN_2532681	Xrra1	7	107	rs4226829	7	100.35	Y	N	38.66	55.59	23.34	44.33	13		rs4226829	7	107.63	2.65	0.97	0.74	3.58	0	0
ILMN_2623112	B930006L02Rik	7	108	rs4226829	7	100.35	Y	N	34.14	43.39	48.04	45.35	1		rs4226829	7	107.63	12.98	24.2	17.07	6.16	0	0
ILMN_2644175	P4ha3	7	107	rs4226829	7	100.35	Y	N	57	34.89	27.05	31.11	1		rs4226829	7	107.63	20.13	12.31	25.75	23.35	0	0
ILMN_2670407	Aqp11	7	105	rs4226829	7	100.35	Y	Y	31.79	34.45	36.21	46.09	1		rs4226829	7	107.63	7.38	4.8	11.52	11.98	0	0
ILMN_2674483	Gpx2-ps1	7	107.41	rs4226829	7	100.35	N	N	55.58	37.24	50.93	34.78	1		rs4226829	7	107.63	11.83	13.62	2.96	5.85	0	0
ILMN_2681446	Clpb	7	109	rs4226829	7	100.35	Y	N	17.95	34.57	38.97	35.98	15		rs4226829	7	107.63	4.04	17.68	5.16	4.57	0	0
ILMN_2693827	Atg16l2	7	108	rs4226829	7	100.35	Y	N	90.63	55.87	80.02	71.01	1		rs4226829	7	107.63	16.96	33.43	16.02	27.52	10	0
ILMN_2698985	Arrb1	7	107	rs4226829	7	100.35	Y	N	38.12	58.85	53.31	55.11	1		rs4226829	7	107.63	28.03	14.96	27.58	21.29	7	0
ILMN_2699635	Rab6	7	108	rs4226829	7	100.35	Y	N	19.84	41.54	21.79	28.69	10		rs4226829	7	107.63	0.02	0.1	1.05	0.07	0	0
ILMN_2702519	D630004N19Rik	7	108	rs4226829	7	100.35	Y	N	49.66	36.05	42.86	34.05	1		rs4226829	7	107.63	18.37	14.97	3.12	5.22	0	0
ILMN_2720995	Pold3	7	107	rs4226829	7	100.35	Y	N	46.81	56.89	51.81	63.73	1		rs4226829	7	107.63	0.53	1.13	0	0.66	0	0
ILMN_2744228	2610209A20Rik	7	107	rs4226829	7	100.35	Y	N	25.9	19.3	4.62	29.07	8		rs4226829	7	107.63	10.19	9.98	17.61	5.96	0	0
ILMN_2759762	Stard10	7	108	rs4226829	7	100.35	Y	N	74.11	69.34	51.53	63.31	1		rs4226829	7	107.63	20.78	9.44	12.65	8.34	0	0
ILMN_2760568	Rnf169	7	107	rs4226829	7	100.35	Y	N	35.66	27.47	28.53	32.96	1		rs4226829	7	107.63	15.15	8.03	19.93	29.07	5	0
ILMN_1215818	Trpc2	7	109	rs6279641	7	101.53	Y	N	65.09	61.44	55.6	43.77	1		CEL-7_88290939	7	108.09	0.15	5.92	4.74	0.82	0	0
ILMN_1220948	Trpc2	7	109	rs6279641	7	101.53	Y	N	36.1	41.16	32.99	37.79	1		CEL-7_88290939	7	108.09	22.88	20.55	10.17	23.04	0	0
ILMN_1241458	Centd2	7	109	rs6279641	7	101.53	Y	N	26.11	26.82	30.83	24.6	1		CEL-7_88290939	7	108.09	11.99	10.91	6.59	6.65	0	0
ILMN_1258770	Lrrc51	7	109	rs6279641	7	101.53	Y	N	38.75	45.04	49.81	51.8	1		CEL-7_88290939	7	108.09	26.71	35.5	29.39	40.09	1	1
ILMN_2620913	Inppl1	7	109	rs6279641	7	101.53	Y	N	12.64	29.7	25.57	22.05	9		CEL-7_88290939	7	108.09	0.23	0	7.88	0	0	0
ILMN_2678269	Ints4	7	105	rs6279641	7	101.53	Y	Y	5.88	9.99	12.48	25.33	5		CEL-7_88290939	7	108.09	6.92	10.87	8.55	17.7	0	0
ILMN_1227203	Trim12	7	111	rs3662937	7	104.11	Y	N	58.34	82.18	57.68	47.46	1		rs3662937	7	111.38	19.75	29.8	16.34	20.79	3	0
ILMN_1229630	Trim30	7	112	rs3662937	7	104.11	Y	N	41.83	49.28	40.57	67.73	1		rs3662937	7	111.38	10.37	14.53	21.71	15.43	0	0
ILMN_1259939	Trim3	7	113	rs3662937	7	104.11	Y	N	62.57	72.62	76.9	52.84	1		rs3662937	7	111.38	24.38	27.2	27.75	22.42	9	0
ILMN_2601441	4931406P16Rik	7	35	rs3662937	7	104.11	Y	N	0.97	0.76	24.22	0.09	4		rs3662937	7	111.38	0.09	3.48	0.06	0.16	0	0
ILMN_2695412	AI451617	7	112	rs3662937	7	104.11	Y	N	18.73	17.93	24.7	14.22	4		rs3662937	7	111.38	4.8	0.96	12.06	14.48	0	0
ILMN_1219253	Olfml1	7	115	rs13479447	7	105.64	Y	N	64.88	64.81	54.55	51.27	1		rs13479447	7	112.91	14.46	17.78	17.24	5.84	0	0
ILMN_1217733	2610024B07Rik	7	119	rs3686975	7	109.77	Y	N	26.7	15.08	31.35	12.09	7		rs3686975	7	117.12	0.15	2.55	0.01	1.66	0	0
ILMN_1256023	EG434228	7	121	rs3686975	7	109.77	Y	N	30.81	13.41	28.72	12.88	7		rs3686975	7	117.12	2.18	4.37	1.75	10.57	0	0
ILMN_1217705	C130002K18Rik	7	125	rs13479470	7	114.49	Y	N	63.57	49.92	65.75	29.83	1		rs13479470	7	121.84	17.86	25.91	11.66	13.79	0	0
ILMN_1236437	9030624J02Rik	7	126	rs13479470	7	114.49	Y	N	74.1	90.83	101.21	67.92	1		rs13479470	7	121.84	20.38	24.61	33.02	23.16	4	0
ILMN_1253348	Arl6ip1	7	125	rs13479470	7	114.49	Y	N	35.8	61.8	52.39	35.14	1		rs13479470	7	121.84	1.16	5.27	5.22	8.44	0	0
ILMN_2501267	Tmc7	7	126	rs13479470	7	114.49	Y	N	50.17	60.75	80.61	60.17	1		rs13479470	7	121.84	11.49	23.49	11.93	17.65	0	0
ILMN_2656996	Syt17	7	126	rs13479470	7	114.49	Y	N	17.69	27.3	23.84	35.17	10		rs13479470	7	121.84	13.56	12.1	13.34	0.93	0	0
ILMN_2717621	Rps15a	7	125	rs13479470	7	114.49	Y	N	74.88	95.93	109.18	62.56	1		rs13479470	7	121.84	22.2	29.49	29.82	24.76	9	0
ILMN_2722488	Thumpd1	7	120	rs13479470	7	114.49	Y	N	84.24	112.61	164.91	64.64	1		rs13479470	7	121.84	10.47	17.47	26.41	21.84	4	0
ILMN_2725969	Mlstd2	7	121	rs13479497	7	122.36	Y	Y	9.12	24.11	14.42	7.43	3		rs6322316	7	127.84	4.72	2.02	7.15	0.4	0	0
ILMN_1232569	Zkscan2	7	131	rs6275579	7	123.6	Y	N	61.83	79.73	95.61	62.27	1		rs6322316	7	127.84	1.64	2.79	0.09	0.49	0	0
ILMN_1243678	Gtf3c1	7	133	rs6275579	7	123.6	Y	N	49.51	41.64	48.31	28.61	1		rs6322316	7	127.84	1.26	0.52	0.02	0.09	0	0
ILMN_2758728	Lcmt1	7	131	rs6275579	7	123.6	Y	N	49.59	48.47	72.81	34.33	1		rs6322316	7	127.84	2.47	0.55	1.03	0.51	0	0
ILMN_1229727	Gpr123	7	147	rs3710520	7	139.64	Y	N	34.08	34.43	28.34	31.06	1		rs3659292	7	146.87	2.86	0.14	0.5	0.82	0	0
ILMN_2658501	Ifitm3	7	148	rs3710520	7	139.64	Y	N	32.67	36.95	34.02	26.08	1		rs3659292	7	146.87	2.51	2.1	0.13	1.09	0	0
ILMN_2674712	Mcph1	8	18.8	rs13479627	8	18.06	Y	Y	33.62	15.84	10.94	8.01	2		rs13479628	8	18.32	7.39	1.55	3.52	3.59	0	0
ILMN_1235502	LOC385065	8	20	rs13479628	8	18.32	Y	Y	7.43	14.91	5.72	26.64	5		rs13479628	8	18.32	1.69	8.53	1.14	1.62	0	0
ILMN_1249977	B930059J09Rik	8	72.1	rs13479628	8	18.32	Y	N	41.96	32.94	48.51	34.43	1		rs13479628	8	18.32	6.1	7.24	7.36	10.9	0	0
ILMN_1222557	D930015M12Rik	2	146	rs3699118	8	18.51	N	N	19	20.29	25.43	20.75	4		rs3699118	8	18.51	0.29	1.13	0.95	0.66	0	0
ILMN_1232487	B230310H07Rik	2	141	rs3699118	8	18.51	N	N	19.91	25.02	24.31	18.94	9		rs3699118	8	18.51	2.32	0	1.1	0.68	0	0
ILMN_1235602	D0Kist3	8	20	rs3699118	8	18.51	Y	Y	43.67	41.78	40.14	33.11	1		rs3699118	8	18.51	0.56	4.64	0.24	1.55	0	0
ILMN_1250939	Agpat5	8	18.9	rs3699118	8	18.51	Y	Y	87.4	111.47	111.67	73.27	1		rs3699118	8	18.51	91.62	73.21	45.96	84.79	0	0
ILMN_2701460	Defb10	8	23	rs3699118	8	18.51	Y	Y	21.27	24.44	16.33	8.44	3		rs3699118	8	18.51	0.04	0.89	2.92	0.01	0	0
ILMN_1223215	6820431F20Rik	8	72.1	rs3711691	8	24.18	Y	N	5.97	14.79	26.57	22.51	4		UT_8_22.019102	8	24.26	12.27	13.41	7.2	4.61	0	0
ILMN_2736094	Mrps31	8	23.5	rs3711691	8	24.18	Y	Y	50.37	39.01	27.11	37.66	1		UT_8_22.019102	8	24.26	29.68	33.72	30.83	32.21	1	1
ILMN_1246289	Got1l1	8	28.3	CEL-8_25820220	8	28.5	Y	Y	66.65	63.93	63.18	50.1	1		CEL-8_25820220	8	28.14	27.04	12.52	17	20.89	2	0
ILMN_2670398	Eif4ebp1	8	28.4	CEL-8_25820220	8	28.5	Y	Y	21.74	27.47	15.74	12.49	3		CEL-8_25820220	8	28.14	6.43	12.87	3.99	11.19	0	0
ILMN_1250821	LOC385019	8	20	rs13479669	8	30.09	Y	N	3.31	3.47	3.13	24.35	5		rs13479670	8	29.87	1.77	5.19	0.03	1.82	0	0
ILMN_2723346	1700029J07Rik	8	47	rs6260564	8	47.95	Y	Y	50.4	67.94	59.28	41.16	1		rs13479741	8	48.19	0.66	0.3	1.89	1.93	0	0
ILMN_2766894	Enpp6	8	48.2	rs6260564	8	47.95	Y	Y	9.91	29.02	10.09	15.9	3		rs13479741	8	48.19	1.76	0.12	0.36	1.3	0	0
ILMN_1241225	Dctd	8	49.2	rs13479744	8	49.76	Y	Y	36.4	56.78	59.73	42.56	1		rs13479741	8	48.19	2.75	0.21	2.48	1.29	0	0
ILMN_2748806	Wwc2	8	48.9	rs13479744	8	49.76	Y	Y	29.85	55.91	43.48	50.89	1		rs13479741	8	48.19	2.07	0.02	0.06	0.25	0	0
ILMN_1215831	D130067E14Rik	8	51.9	rs13479753	8	52.05	Y	Y	44.17	37.33	46.01	37.23	1		rs13479741	8	48.19	0.59	0.21	0.26	0.21	0	0
ILMN_2486573	Vegfc	8	55.3	rs13479753	8	52.05	Y	Y	34.86	33.73	31.87	23.44	12		rs13479741	8	48.19	0	4.86	0.2	0.71	0	0
ILMN_1246642	Palld	8	64	rs3726882	8	61.16	Y	Y	32.74	35.7	17.89	15.51	6		rs6399377	8	60.18	0.02	0	0.61	1.01	0	0
ILMN_2431965	Palld	8	64	rs3726882	8	61.16	Y	Y	9.92	25.47	4.31	19.27	3		rs6399377	8	60.18	0	0.18	0.13	2.12	0	0
ILMN_2461601	1700021K10Rik	8	60.3	rs3726882	8	61.16	Y	Y	12.46	24.96	14.93	24.42	10		rs6399377	8	60.18	0	14.57	0.42	0.42	0	0
ILMN_2722260	4930431L04Rik	8	61	rs3726882	8	61.16	Y	Y	54.95	59.4	36.13	46.22	1		rs6399377	8	60.18	26.56	24.53	20.85	25.21	2	0
ILMN_1223285	Hspa2	12	77.5	rs3702472	8	71.02	N	N	2.37	3.84	5.6	26.72	5		rs3656875	8	70.72	1.77	2.22	0.02	0	0	0
ILMN_1225889	Ints10	8	71.4	rs3702472	8	71.02	Y	Y	19.29	35.24	21.19	24.99	10		rs3656875	8	70.72	10.33	2.87	1.31	1.1	0	0
ILMN_1234132	Ints10	8	71.4	rs3702472	8	71.02	Y	Y	15.77	21.68	26.41	9.75	4		rs3656875	8	70.72	11.25	22.1	19.74	14.85	0	0
ILMN_2692723	Lpl	8	71.4	rs3702472	8	71.02	Y	Y	77.09	69.5	84.95	75.18	1		rs3656875	8	70.72	49.92	58.2	23.62	26.37	13	0
ILMN_2706462	Il12a	3	68.5	rs3702472	8	71.02	N	N	7.47	2.25	25.68	4.24	4		rs3656875	8	70.72	0.93	1.98	1.11	0	0	0
ILMN_1225833	LOC384847	8	79.4	D8Mit145	8	74.68	Y	Y	31.97	44.87	36.05	40.96	1		rs3685305	8	74.27	0.12	0.07	0.14	0.02	0	0
ILMN_1249626	LOC242025	6	34.7	D8Mit145	8	74.68	N	N	14.89	21.57	11.23	27	5		rs3685305	8	74.27	0.67	0.1	0.79	0.36	0	0
ILMN_2511868	Ccdc75	17	79.2	D8Mit145	8	74.68	N	N	7.12	8.92	27.58	8.02	4		rs3685305	8	74.27	0.69	0.62	2.87	0	0	0
ILMN_2624469	Oas1g	5	121	D8Mit345	8	81.64	N	N	3.78	0.01	24.77	1.2	4		gnf08.078.689	8	79.92	0.01	2.06	5.14	1.53	0	0
ILMN_1221345	9430002A10Rik	8	90.7	rs6186316	8	90.38	Y	Y	20.38	11.03	25.26	26.72	11		rs13479883	8	89.79	0.27	2.33	3.69	2.2	0	0
ILMN_1226311	Chd9	8	93.4	rs6186316	8	90.38	Y	Y	36.18	36.79	58.3	39.46	1		rs13479883	8	89.79	0.37	0.62	0.54	4.96	0	0
ILMN_1233446	Cyld	8	91.3	rs6186316	8	90.38	Y	Y	30.84	29.12	41.46	18.58	12		rs13479883	8	89.79	6.37	12.15	13.88	12.26	0	0
ILMN_2469366	Zfp423	8	90.2	rs6186316	8	90.38	Y	Y	44.59	59.04	43.59	46.19	1		rs13479883	8	89.79	0.48	0.64	0.55	0.05	0	0
ILMN_2550908	9430002A10Rik	8	90.7	rs6186316	8	90.38	Y	Y	72.03	65.71	80.58	63.55	1		rs13479883	8	89.79	1.67	0.41	0.26	0.22	0	0
ILMN_2604403	4933436C20Rik	8	94.9	rs6186316	8	90.38	Y	Y	45.2	51.56	39.08	34.3	1		rs13479883	8	89.79	29.49	9.05	17.83	21.8	2	0
ILMN_2660793	F9	X	57.3	rs6186316	8	90.38	N	N	24.02	30.85	27.86	31.25	1		rs13479883	8	89.79	3.41	0.34	4.77	4.85	0	0
ILMN_2696611	Nkd1	8	91.1	rs6186316	8	90.38	Y	Y	14.09	25.4	14.32	25.02	10		rs13479883	8	89.79	7.79	11.38	4.98	3.55	0	0
ILMN_2729918	1700047E16Rik	8	93.7	rs6186316	8	90.38	Y	Y	49.63	42.39	48.01	30.67	1		rs13479883	8	89.79	18.66	11.96	5.79	2.87	0	0
ILMN_1229531	Kifc3	8	97.6	rs3704645	8	95.79	Y	Y	1.78	19.04	9.48	26.3	5		mCV24938952	8	95.66	0.44	0.94	1.45	0.85	0	0
ILMN_1230581	Cyld	8	91.2	rs3704645	8	95.79	Y	Y	15.01	31.95	8.55	1.08	3		mCV24938952	8	95.66	8.07	3	7.37	0.54	0	0
ILMN_1232237	Ciapin1	8	97.4	rs3704645	8	95.79	Y	Y	13.13	13.64	31.91	21.26	4		mCV24938952	8	95.66	9.7	7.56	0.74	2.77	0	0
ILMN_1248257	Aytl1a	8	95.4	rs3704645	8	95.79	Y	Y	28.08	42.68	38.18	26.75	1		mCV24938952	8	95.66	12.33	23.51	31.05	15.43	4	0
ILMN_2427874	Capns2	8	95.4	rs3704645	8	95.79	Y	Y	40.24	48.11	50.21	38.97	1		mCV24938952	8	95.66	20.73	44.49	19.61	25.28	3	0
ILMN_2627920	Aytl1a	8	95.4	rs3704645	8	95.79	Y	Y	37.89	39.57	25.63	21.74	12		mCV24938952	8	95.66	44.13	44.58	22.98	27.2	13	0
ILMN_2717015	Ccl17	8	97.3	rs3704645	8	95.79	Y	Y	57.88	43.39	56.43	30.92	1		mCV24938952	8	95.66	8.37	10.56	10.26	2.41	0	0
ILMN_2674095	Ciapin1	8	97.4	rs3705695	8	98.25	Y	Y	26.11	8.47	7.77	13.56	2		rs4227350	8	98.17	2.39	3.88	6.07	10.55	0	0
ILMN_1241606	Appbp1	8	107	rs13479961	8	106.29	Y	Y	4.98	4.85	27.6	8.65	4		rs13479961	8	105.92	0.04	0.08	0	8.48	0	0
ILMN_1247401	Nfatc3	8	109	rs13479961	8	106.29	Y	Y	10.28	24.34	10.29	11.39	3		rs13479961	8	105.92	5.56	0.02	0.06	0.17	0	0
ILMN_2535566	LOC382691	12	19.7	rs13479961	8	106.29	N	N	24.17	16.33	9.95	13.25	2		rs13479961	8	105.92	2.47	0.35	0.22	0.11	0	0
ILMN_2572467	E330019D12Rik	8	108	rs13479961	8	106.29	Y	Y	36.97	48.9	43.93	33.07	1		rs13479961	8	105.92	2.21	0.07	0.35	0.51	0	0
ILMN_2679037	Cmtm3	8	107	rs13479961	8	106.29	Y	Y	22.78	28.32	17.02	10.79	3		rs13479961	8	105.92	0.19	0.02	0.18	5.21	0	0
ILMN_1230890	Fmo5	3	97.5	gnf08.108.032	8	109.7	N	N	26.93	10.13	1.82	6	2		gnf08.108.032	8	109.33	0.94	0.57	0	1.31	0	0
ILMN_1236845	Gfod2	8	108	gnf08.108.032	8	109.7	Y	Y	41.16	56.1	55.95	42.32	1		gnf08.108.032	8	109.33	0.06	0.45	0.02	1.2	0	0
ILMN_1240030	Nfatc3	8	109	gnf08.108.032	8	109.7	Y	Y	40.46	23.13	23.45	14.22	2		gnf08.108.032	8	109.33	0.58	0.34	0.53	1.97	0	0
ILMN_1240576	Tsnaxip1	8	108	gnf08.108.032	8	109.7	Y	Y	12.71	25.83	27.69	17.91	9		gnf08.108.032	8	109.33	2.18	1.46	0	0.01	0	0
ILMN_2600389	Slc7a6	8	109	gnf08.108.032	8	109.7	Y	Y	21.25	47.68	36.06	23.94	9		gnf08.108.032	8	109.33	0.22	0.02	0	0.01	0	0
ILMN_2623712	Terf2	8	110	gnf08.108.032	8	109.7	Y	Y	65.7	70.3	56.34	51.69	1		gnf08.108.032	8	109.33	0.27	0	0.09	2.38	0	0
ILMN_2653972	Cenpt	8	108	gnf08.108.032	8	109.7	Y	Y	19.89	34.99	29.29	29.06	15		gnf08.108.032	8	109.33	1.73	0.95	0.03	0.04	0	0
ILMN_2698221	Bean	8	107	gnf08.108.032	8	109.7	Y	Y	26.21	24.78	27.54	19.37	12		gnf08.108.032	8	109.33	1.76	2.83	0.05	1.06	0	0
ILMN_2706129	E130303B06Rik	8	108	gnf08.108.032	8	109.7	Y	Y	45.7	43.06	34.99	25.01	1		gnf08.108.032	8	109.33	0.04	0.07	0.45	2.06	0	0
ILMN_2724322	Cirh1a	8	109	gnf08.108.032	8	109.7	Y	Y	24.37	20.77	12.08	29.53	8		gnf08.108.032	8	109.33	3.99	9.21	0.2	0	0	0
ILMN_2726005	Plekhg4	8	108	gnf08.108.032	8	109.7	Y	Y	13.88	31.71	25.76	18.82	9		gnf08.108.032	8	109.33	0.12	0.1	1.73	2.15	0	0
ILMN_2757870	Psmb10	8	109	gnf08.108.032	8	109.7	Y	Y	2.62	22.36	13.95	27.06	5		gnf08.108.032	8	109.33	1.44	0.5	0.95	0.33	0	0
ILMN_1221652	Adamts18	8	116	rs13479993	8	115.82	Y	Y	26.97	12.76	17.67	25.91	8		rs13479993	8	115.45	8.08	9.86	6.63	9.17	0	0
ILMN_2701824	BC060631	8	119	gnf08.116.039	8	117.71	Y	Y	23.45	32.03	25.1	26.21	15		gnf08.116.039	8	117.35	0.02	2.52	0.03	5.38	0	0
ILMN_1231468	1700030J22Rik	8	119	rs3665212	8	119.78	Y	Y	38.83	43.37	41.74	32.48	1		gnf08.118.027	8	119.33	0.15	1.12	1.22	0.85	0	0
ILMN_1218457	Abcb10	8	127	D8Mit148	8	126.66	Y	Y	85.13	87.32	73.22	56.86	1		rs13480026	8	126.22	0.01	1.22	0	0.4	0	0
ILMN_2766592	Sipa1l2	8	128	rs4227456	8	127.56	Y	Y	50	47.34	51.9	47.73	1		rs13480026	8	126.22	0	0.2	0.68	0.34	0	0
ILMN_1225545	Disc1	8	128	rs3709567	8	129.1	Y	Y	16.71	27.48	30.6	27.07	15		rs6400423	8	129.11	0.23	0.86	5.65	0.63	0	0
ILMN_2635801	C1orf57	8	128	rs3709567	8	129.1	Y	Y	216.57	225.72	110.55	243.33	1		rs6400423	8	129.11	1.42	0.01	0.31	0.28	0	0
ILMN_2688560	Pcnxl2	8	128	rs3709567	8	129.1	Y	Y	83.42	69.39	54.99	75.25	1		rs6400423	8	129.11	2.22	0.18	0.65	2.97	0	0
ILMN_1239774	Dync2h1	9	7.03	mCV23893269	9	4.06	Y	Y	20.24	23.55	20.51	33.68	5		mCV25073238	9	10.57	0.02	0.02	1.67	0	0	0
ILMN_1256057	Cwf19l2	9	3.43	mCV23893269	9	4.06	Y	Y	34.46	24.24	24.75	38.69	1		mCV25073238	9	10.57	0.56	2.76	0.55	0.33	0	0
ILMN_1218424	Ppp2r2d	7	146	petM-05537-1	9	28.87	N	N	31.98	42.49	23.16	41.43	13		CEL-9_29909656	9	29.75	1.42	0.28	0.01	0	0	0
ILMN_1260032	Opcml	9	28.7	petM-05537-1	9	28.87	Y	Y	39.98	34.78	11.47	32.83	13		CEL-9_29909656	9	29.75	1.68	0.48	2.7	0.61	0	0
ILMN_2684007	Opcml	9	28.6	petM-05537-1	9	28.87	Y	Y	17.53	19.62	32.62	40.68	11		CEL-9_29909656	9	29.75	0.95	0.12	2.33	0.19	0	0
ILMN_1233455	Olfml3	3	104	CEL-9_29909656	9	29.69	N	N	16.01	15.56	13.99	26.24	5		CEL-9_29909656	9	29.75	0.01	1.19	0.14	0.2	0	0
ILMN_2610822	Cd79b	11	106	CEL-9_29909656	9	29.69	N	N	25	13.37	0.04	1.35	2		CEL-9_29909656	9	29.75	2.8	2.13	0	0.1	0	0
ILMN_1217063	Liph	16	22	rs13480128	9	32.49	N	N	36.01	19.13	9.67	19.23	2		rs4227587	9	32.56	9.22	0.32	0.39	4.57	0	0
ILMN_1221530	Adcy7	8	90.8	rs13480128	9	32.49	N	N	45.26	9.36	8.35	8.89	2		rs4227587	9	32.56	0	0.62	1.2	2.45	0	0
ILMN_1227035	B230322F03Rik	7	36.3	rs13480128	9	32.49	N	N	0.91	8.39	26.27	0.37	4		rs4227587	9	32.56	2.47	0.42	0.22	0.76	0	0
ILMN_1230587	Lpxn	19	12.9	rs13480128	9	32.49	N	N	29.26	28.38	29.69	30.6	1		rs4227587	9	32.56	4.67	0.18	0.64	0.02	0	0
ILMN_1247377	Mpeg1	19	12.5	rs13480128	9	32.49	N	N	8.41	21.62	25.66	28.84	11		rs4227587	9	32.56	1.02	0.12	0.03	0.41	0	0
ILMN_2660263	Bcl2a1b	9	88.6	rs13480128	9	32.49	Y	N	32.43	30.65	36.31	39.54	1		rs4227587	9	32.56	0.24	0.57	0.34	1.62	0	0
ILMN_1247377	Mpeg1	19	12.5	rs3667699	9	34.14	N	N	7.04	13.9	23.19	30.56	5		rs3711756	9	34.27	2.14	0.41	0.25	0.19	0	0
ILMN_2440194	Kirrel3	9	34.6	rs13480135	9	34.42	Y	Y	89.12	81.88	77.4	79.58	1		rs4139403	9	34.45	37.05	38.45	38.92	32.6	1	1
ILMN_1218383	Kirrel3	9	34.8	gnf09.029.219	9	34.71	Y	Y	24.01	14.16	36.28	28.17	14		rs3659084	9	34.65	0	0.55	4.54	0.16	0	0
ILMN_1239205	Ptcd2	13	100	UT_9_35.918713	9	34.96	N	N	0.11	1.01	26.71	5.23	4		UT_9_35.918713	9	35.02	0.11	2.78	0.12	0.61	0	0
ILMN_2452219	C130027E04Rik	9	35	UT_9_35.918713	9	34.96	Y	Y	59	32.96	52.56	53.07	1		UT_9_35.918713	9	35.02	24.07	43.38	24.54	28.27	10	0
ILMN_2685023	Hmha1	10	79.5	UT_9_35.918713	9	34.96	N	N	9.4	24.36	12.29	9.23	3		UT_9_35.918713	9	35.02	2.21	0.04	3	0.7	0	0
ILMN_2711754	Foxred1	9	35	UT_9_35.918713	9	34.96	Y	Y	37.96	44.41	38.66	38.51	1		UT_9_35.918713	9	35.02	22.44	48.8	27.58	51.58	15	0
ILMN_2720770	Dcps	9	34.9	UT_9_35.918713	9	34.96	Y	Y	37.11	46.93	39.99	39.99	1		UT_9_35.918713	9	35.02	17.96	19.05	20.01	19.21	0	0
ILMN_2747480	Srpr	9	35	UT_9_35.918713	9	34.96	Y	Y	103.43	118.14	108.28	119.43	1		UT_9_35.918713	9	35.02	56.38	60.38	55.82	44.25	1	1
ILMN_2718974	Rpusd4	9	35.1	rs13480143	9	37.21	Y	Y	1.52	5.5	25.18	18.41	4		UT_9_38.426043	9	37.45	1.34	0.14	0.73	1.22	0	0
ILMN_1237421	Nucb2	9	49.3	rs13480180	9	48.17	Y	Y	33.7	21.77	8.44	25.68	8		gnf09.042.496	9	48.02	3.11	2.82	3.19	2.3	0	0
ILMN_1239900	Cadm1	9	47.5	rs13480180	9	48.17	Y	Y	22.01	25.2	11.55	7.59	3		gnf09.042.496	9	48.02	0.97	0.25	2.89	0.01	0	0
ILMN_1259289	Ttc12	9	48.9	rs13480180	9	48.17	Y	Y	85.93	70.42	63.6	69.55	1		gnf09.042.496	9	48.02	62.73	56.7	52.27	42.2	1	1
ILMN_2445021	Zw10	9	48.9	rs13480180	9	48.17	Y	Y	34.92	38.19	38.17	28.45	1		gnf09.042.496	9	48.02	8.92	19.63	14.59	22.39	0	0
ILMN_2586632	ENSMUSG00000060603	9	49.3	rs13480180	9	48.17	Y	Y	27.51	30.35	23.37	14.48	6		gnf09.042.496	9	48.02	0.09	4.21	8.06	3.34	0	0
ILMN_2702403	Htr3a	9	48.7	rs13480180	9	48.17	Y	Y	35.13	34.17	19.68	24.55	13		gnf09.042.496	9	48.02	2.35	1.13	4.28	0.1	0	0
ILMN_1214157	Pih1d2	9	50.4	rs13480188	9	50.32	Y	Y	42.5	52.72	32.54	55.55	1		gnf09.044.659	9	50.18	32.82	33.76	18.69	19.45	6	0
ILMN_1214173	Dixdc1	9	50.5	rs13480188	9	50.32	Y	Y	35.75	56.35	38.36	42.63	1		gnf09.044.659	9	50.18	32.28	16.44	16.79	21.56	2	0
ILMN_2609495	Alg9	9	50.7	rs13480188	9	50.32	Y	Y	51.55	69.25	55.05	55.83	1		gnf09.044.659	9	50.18	23.64	37.03	22.64	33.81	10	0
ILMN_2757993	Dlat	9	50.4	rs13480188	9	50.32	Y	Y	14.75	25.63	33.28	27.54	15		gnf09.044.659	9	50.18	2.74	18.35	12.25	2.47	0	0
ILMN_2774486	Bcdo2	9	50.3	rs13480188	9	50.32	Y	Y	38.7	33.04	32.28	49.14	1		gnf09.044.659	9	50.18	11.06	11.08	12.57	21.93	0	0
ILMN_1245195	Tnfaip8l3	9	53.9	rs3723670	9	52.27	Y	Y	91.37	78.13	45.76	86.56	1		rs3656996	9	52	17.82	34.63	15.04	19.89	3	0
ILMN_1250814	4930550C14Rik	9	53.2	rs3723670	9	52.27	Y	Y	22.44	33.55	36.08	30.5	15		rs3656996	9	52	1.02	1.21	3.52	5.38	0	0
ILMN_1258441	Nkx2-4	2	147	rs3723670	9	52.27	N	N	2.4	1.4	6.41	25.56	5		rs3656996	9	52	0.99	5.14	3.78	0.03	0	0
ILMN_3160411	9830163H01Rik	9	1	rs3723670	9	52.27	Y	N	40.27	7.82	11.04	14.65	2		rs3656996	9	52	12.96	25.44	3.88	12.26	0	0
ILMN_1228489	Hmg20a	9	56.3	rs6206353	9	55.72	Y	Y	42.64	41.63	36.3	38.65	1		rs3677551	9	56.55	20.64	22.32	35.41	38.66	11	0
ILMN_1233581	Hmg20a	9	56.3	rs6206353	9	55.72	Y	Y	31.54	46.59	35.63	36.58	1		rs3677551	9	56.55	18.89	11.29	9.38	4.08	0	0
ILMN_2564650	Sin3a	9	57	rs6206353	9	55.72	Y	Y	96.63	88.75	63.24	106.99	1		rs3677551	9	56.55	27.51	53.76	38.7	52.64	1	1
ILMN_2754222	Rpp25	9	57.4	rs6206353	9	55.72	Y	Y	89.46	70.73	70.52	74.32	1		rs3677551	9	56.55	25.06	36.63	19.04	24.36	3	0
ILMN_1234177	9530050F08Rik	9	58.2	rs13480217	9	57.62	Y	Y	24.38	22.76	17.62	16.62	2		rs13480217	9	57.67	5.8	14.72	1.79	2.56	0	0
ILMN_2732576	Pml	9	58.1	rs13480217	9	57.62	Y	Y	83.18	85.17	56.7	74.78	1		rs13480217	9	57.67	38.24	29.86	20.99	4.63	6	0
ILMN_1220121	Kif23	9	61.8	rs13480227	9	60.85	Y	Y	59.05	71.04	52.7	73.53	1		rs3664495	9	59.93	0.85	0	0.06	0	0	0
ILMN_1236500	Glce	9	61.9	rs13480227	9	60.85	Y	Y	41.62	19.23	33	17.11	7		rs3664495	9	59.93	0.8	1.12	1.9	0.14	0	0
ILMN_1238874	Rplp1	9	61.8	rs13480227	9	60.85	Y	Y	27.27	42.14	21.32	22.83	6		rs3664495	9	59.93	2.46	0.34	0.89	2.29	0	0
ILMN_2639375	Map2k5	9	63	rs6172647	9	62.31	Y	Y	25.14	17.55	25.27	19.85	7		rs4227706	9	62.23	0.24	0.74	4.62	7.95	0	0
ILMN_2701778	Itga11	9	62.6	rs6172647	9	62.31	Y	Y	35.4	31.14	26.98	37.38	1		rs4227706	9	62.23	17.42	13.08	21.12	32.56	5	0
ILMN_2773835	Smad6	9	63.8	rs3685822	9	63.89	Y	Y	38.3	36.26	21.8	17.65	6		rs13480240	9	63.81	17.18	16.19	9.59	8.43	0	0
ILMN_1235361	3300001A09Rik	9	67.6	rs13480253	9	67.18	Y	Y	41.28	31.38	34.82	15.29	12		rs13480251	9	66.84	2.11	1.5	0.49	3.48	0	0
ILMN_2541505	LOC382084	9	67.8	rs13480253	9	67.18	Y	Y	30.55	21.43	32.64	26.26	14		rs13480251	9	66.84	11	17.71	19.89	8.92	0	0
ILMN_2693934	4833444G19Rik	9	70.2	rs13480253	9	67.18	Y	Y	42.09	28.54	34.78	16.04	12		rs13480251	9	66.84	4.07	1.99	2.72	3.9	0	0
ILMN_2565419	Narg2	9	69.3	D9Mit289	9	69.16	Y	Y	43.23	64.61	50.27	40.27	1		rs13480260	9	69.46	0.49	4.97	0.57	0.98	0	0
ILMN_1214634	Aqp9	9	71	rs13480265	9	70.57	Y	Y	15.98	13.45	29.03	24.82	11		rs3721056	9	70.88	9.77	11.25	11.03	15.49	0	0
ILMN_1236354	BC031353	9	74.8	rs3724833	9	74.67	Y	Y	40.95	39.69	39.07	46.24	1		rs3724833	9	74.74	14.15	35.82	14.27	7.64	3	0
ILMN_1250286	Myo5a	9	75.1	rs3724833	9	74.67	Y	Y	50.94	43.51	49.63	21.96	12		rs3724833	9	74.74	12.38	11.79	14.34	21.9	0	0
ILMN_1251419	Mela	8	126	rs3724833	9	74.67	N	N	88.38	113.53	109.81	69.37	1		rs3724833	9	74.74	79.72	110.24	71.25	96.18	1	1
ILMN_1254736	Myo5a	9	75.1	rs3724833	9	74.67	Y	Y	24.6	43.51	33.04	23.4	12		rs3724833	9	74.74	31.14	34.62	21.01	36.15	13	0
ILMN_1259684	Endogl1	9	119	rs3724833	9	74.67	Y	N	8.69	6.86	4.07	29.2	5		rs3724833	9	74.74	2.79	0.22	0.29	7.11	0	0
ILMN_2674407	Arpp19	9	74.9	rs3724833	9	74.67	Y	Y	33.46	51.47	50.35	26.28	1		rs3724833	9	74.74	5.76	34.34	5.05	17.33	3	0
ILMN_2628759	Htr1b	9	81.5	UT_9_82.992406	9	80.09	Y	Y	16.89	31.47	18.46	32.56	10		UT_9_82.824657	9	79.99	0.76	0.01	0.02	0.04	0	0
ILMN_2656854	Myo6	9	80.2	UT_9_82.992406	9	80.09	Y	Y	31.11	19.69	28.03	24.73	14		UT_9_82.824657	9	79.99	2.62	13.2	0.2	0.01	0	0
ILMN_1232151	Lca5	9	83.3	rs13480308	9	82.5	Y	Y	24.47	11.85	21.3	33.03	8		rs3676124	9	83.01	0.23	2.43	0.02	6.02	0	0
ILMN_1234200	Irak1bp1	9	82.7	rs13480308	9	82.5	Y	Y	25.12	21.46	33.03	47.01	14		rs3676124	9	83.01	2.57	1.77	4.74	0.59	0	0
ILMN_1234202	Phip	9	82.8	rs13480308	9	82.5	Y	Y	39.34	42.76	46.08	51.78	1		rs3676124	9	83.01	1.56	0.46	3.87	0.02	0	0
ILMN_1250507	Elovl4	9	83.7	rs13480308	9	82.5	Y	Y	48.92	40.31	52.27	45.24	1		rs3676124	9	83.01	11.41	18.58	7.02	11.31	0	0
ILMN_1257594	9330197B14Rik	9	83.3	rs13480308	9	82.5	Y	Y	122.95	123.33	103.03	116.96	1		rs3676124	9	83.01	6.03	10.42	0.27	5.91	0	0
ILMN_2481694	4933431K14Rik	9	85.6	rs13480308	9	82.5	Y	Y	88.7	90.34	80.83	96.2	1		rs3676124	9	83.01	0.1	0.17	0.43	2.09	0	0
ILMN_2609868	AI427122	9	95.7	rs13480308	9	82.5	Y	N	8.46	9.3	15.51	24.44	5		rs3676124	9	83.01	3.11	1.05	2.84	0.13	0	0
ILMN_2622804	Sh3bgrl2	9	83.5	rs13480308	9	82.5	Y	Y	28.34	41.97	38.82	33.91	1		rs3676124	9	83.01	0.52	0.55	0	0.64	0	0
ILMN_2644719	Hmgn3	9	83	rs13480308	9	82.5	Y	Y	25.98	20.47	16.41	16.8	2		rs3676124	9	83.01	0.55	4.35	14.56	19.4	0	0
ILMN_1230916	Morf4l1	9	90.1	rs3693091	9	90.2	Y	Y	90.26	91.52	93.55	83.73	1		rs3693091	9	90.3	44.8	70.11	45.73	45.68	1	1
ILMN_1236805	Plscr4	9	92.4	rs3693091	9	90.2	Y	Y	48.7	42.54	44.03	45.46	1		rs3693091	9	90.3	7.7	4.72	3.73	11.62	0	0
ILMN_1257458	LOC384941	9	59.6	rs3693091	9	90.2	Y	N	2.89	27.46	0.03	1.38	3		rs3693091	9	90.3	0.1	0.02	1.11	0.45	0	0
ILMN_2624328	Adamts7	9	90.1	rs3693091	9	90.2	Y	Y	13.15	31.39	20.45	16.15	3		rs3693091	9	90.3	13.29	13.39	2.44	8.65	0	0
ILMN_1238094	Tfdp2	9	96.2	rs6292067	9	92.89	Y	Y	85.95	91.88	74.52	88.56	1		rs13480348	9	92.78	0.01	0.01	1.38	3.42	0	0
ILMN_2510943	Trpc1	9	95.6	rs6292067	9	92.89	Y	Y	25.74	39.99	41.73	31.04	1		rs13480348	9	92.78	4.61	3.78	0.32	0.81	0	0
ILMN_2678421	Pcolce2	9	95.5	rs6292067	9	92.89	Y	Y	13.7	24.43	11.47	8.71	3		rs13480348	9	92.78	0.44	0.18	0.2	3.01	0	0
ILMN_2752524	Paqr9	9	95.5	rs6292067	9	92.89	Y	Y	58.44	56.53	31.06	41.34	1		rs13480348	9	92.78	0.59	3.63	0.41	0.91	0	0
ILMN_1214046	Clstn2	9	97.4	rs13480363	9	97.85	Y	Y	43.15	40.21	31.53	30.37	1		rs3699740	9	98.4	0.57	5.09	2.56	1.57	0	0
ILMN_1230072	Armc8	9	99.5	D9Mit12	9	99.72	Y	Y	44.48	58.64	30.49	42.49	1		rs6385971	9	99.77	0.16	2.58	0.1	2.54	0	0
ILMN_2743780	3222402P14Rik	9	101	D9Mit12	9	99.72	Y	Y	48.79	42.62	42.98	38.06	1		rs6385971	9	99.77	0.25	0.01	1.14	1.18	0	0
ILMN_1253926	Acpl2	9	96.7	rs3089531	9	101.74	Y	N	17.93	3.71	15.95	25.11	5		rs6286924	9	101.94	0.03	0.02	3.72	0.01	0	0
ILMN_2644719	Hmgn3	9	83	rs3089531	9	101.74	Y	N	16.46	28.93	16.06	16.23	3		rs6286924	9	101.94	1.48	0.54	0.35	2.62	0	0
ILMN_1213862	Usp19	9	108	D9Mit200	9	112.72	Y	Y	36.24	38.34	39.23	29.28	1		gnf09.109.694	9	112.89	0.49	0.17	0.84	0	0	0
ILMN_1228363	Qrsl1	9	108	D9Mit200	9	112.72	Y	Y	37.26	45.06	44.44	31.2	1		gnf09.109.694	9	112.89	1.71	0.1	0.19	0.98	0	0
ILMN_2540058	E330015C15Rik	7	26.6	D9Mit200	9	112.72	N	N	8.41	0.66	25.87	0.72	4		gnf09.109.694	9	112.89	0.21	1.38	0.08	1.21	0	0
ILMN_1221935	Glb1	9	114	rs3721068	9	113.76	Y	Y	17.1	16.93	25.77	23.16	4		rs3694903	9	113.94	0.81	6.85	1.62	0.3	0	0
ILMN_1242388	Stt3b	9	115	D8Mit46UT	9	114.7	Y	Y	78.61	74.67	51.66	64.8	1		Glb1_AFFY_1416205	9	114.38	0	1.46	0.39	0.05	0	0
ILMN_1249046	Cmtm8	9	115	D8Mit46UT	9	114.7	Y	Y	27.6	15.94	17.47	27.6	8		Glb1_AFFY_1416205	9	114.38	0.05	1.57	0.03	0.26	0	0
ILMN_1221102	Arl5a	2	52.3	rs13480442	9	117.07	N	N	20.85	18.63	24.45	19.33	4		RBMS3_AFFY_1452761	9	116.48	0.16	0.25	0.24	0.06	0	0
ILMN_1227142	Rpl14	9	120	rs13480448	9	119.28	Y	Y	40.82	45.11	59.04	33.48	1		rs8254361	9	119.25	7.58	21.68	20.21	18.19	0	0
ILMN_1243988	Rpsa	9	28.4	rs13480448	9	119.28	Y	N	75.11	75	76.2	68.76	1		rs8254361	9	119.25	56.07	68.81	37.69	41.69	1	1
ILMN_1256444	Osr1	9	119	rs13480448	9	119.28	Y	Y	41.21	71.46	56.4	49.39	1		rs8254361	9	119.25	2.45	0.5	2.81	5.31	0	0
ILMN_2445926	Xylb	9	119	rs13480448	9	119.28	Y	Y	15.69	25.28	19.47	11.14	3		rs8254361	9	119.25	4.35	7.45	3.11	9.51	0	0
ILMN_2613175	5830454E08Rik	9	120	rs13480448	9	119.28	Y	Y	30.3	40.01	30.09	34.41	1		rs8254361	9	119.25	10.47	20.23	16.25	9.07	0	0
ILMN_2774646	Myd88	9	119	rs13480448	9	119.28	Y	Y	46.71	50.4	57.82	50.81	1		rs8254361	9	119.25	6.36	4.4	0.82	2.63	0	0
ILMN_2650557	Ccbp2	9	122	rs13480454	9	120.55	Y	Y	32.58	39.12	29.97	46.94	1		rs13480454	9	120.61	18.45	17.33	12.2	15.53	0	0
ILMN_2772422	Iyd	10	6.79	D10Mit166	10	6.46	Y	Y	64	62.5	67.19	55.63	1		rs6185923	10	5.38	2.96	0.99	1.95	0.21	0	0
ILMN_1214706	Sash1	10	8.53	rs13480493	10	9.9	Y	Y	82.1	100.37	88.9	58.2	1		rs3669183	10	10.16	0.13	1.71	0.72	0.16	0	0
ILMN_1217991	Ust	10	7.93	rs13480493	10	9.9	Y	Y	10.57	13.22	5.54	24.47	5		rs3669183	10	10.16	2.71	14.6	5.08	3.5	0	0
ILMN_1254210	Samd5	10	9.35	rs13480493	10	9.9	Y	Y	38.56	44.66	43.38	34.42	1		rs3669183	10	10.16	0.78	1.66	5.65	0.45	0	0
ILMN_1216215	Nudt18	14	71	rs13480504	10	12.88	N	N	25	15.97	1.04	2.74	2		rs4228112	10	12.73	0.14	0.21	0.14	0.1	0	0
ILMN_1220353	Hdac3	18	38.1	rs13480504	10	12.88	N	N	5.28	25.62	1.42	0.7	3		rs4228112	10	12.73	0.74	0.43	3.76	0.8	0	0
ILMN_1235054	Zcchc14	8	124	rs13480504	10	12.88	N	N	26.4	4.24	0.53	0.08	2		rs4228112	10	12.73	0.31	2.83	0.07	3.69	0	0
ILMN_1252719	Wbscr22	5	136	rs13480504	10	12.88	N	N	24.28	11.73	0.09	1.08	2		rs4228112	10	12.73	0.84	0.09	3.72	4.88	0	0
ILMN_2672035	Ccdc115	1	34.5	rs13480504	10	12.88	N	N	25.2	7.25	0.04	0.04	2		rs4228112	10	12.73	5.76	0.57	4.84	4.77	0	0
ILMN_2680937	Sap130	18	31.9	rs13480504	10	12.88	N	N	27.49	1.17	1.3	2.59	2		rs4228112	10	12.73	1.58	0.03	0.4	0.04	0	0
ILMN_2730249	2310005N01Rik	4	125	rs13480504	10	12.88	N	N	16.86	24.53	0.76	2.8	3		rs4228112	10	12.73	1.73	0	6.44	2	0	0
ILMN_2730311	2610017I09Rik	1	42.7	rs13480504	10	12.88	N	N	24.8	6.46	3.05	1.67	2		rs4228112	10	12.73	2.55	0.31	0.02	0.38	0	0
ILMN_2776857	Mad2l1	6	66.5	rs13480504	10	12.88	N	N	24.91	15.34	1.96	0.27	2		rs4228112	10	12.73	3.91	0.1	0.16	5.2	0	0
ILMN_2718406	Rab26	17	24.7	rs3658786	10	13.82	N	N	1.2	8.19	1.73	26.86	5		rs6190586	10	13.88	2.03	0.05	0.06	0.12	0	0
ILMN_1231596	Mtap7	10	20	rs13480529	10	19.79	Y	Y	38.49	27.03	36.03	58.5	1		rs3688363	10	19.8	0.83	1.7	0.87	0.92	0	0
ILMN_1238215	Ctgf	10	24.3	rs13480546	10	23.97	Y	Y	32.1	29.23	34.21	28.75	1		rs13480531	10	20.49	0.39	1.23	0	2.76	0	0
ILMN_2488835	Epb41l2	10	25.2	rs13480546	10	23.97	Y	Y	83.82	84.75	81.93	83.9	1		rs13480531	10	20.49	0	0.88	1.46	1.07	0	0
ILMN_2654068	Med23	10	24.6	rs13480546	10	23.97	Y	Y	69.79	71.97	61.87	65.29	1		rs13480531	10	20.49	4.96	0.26	1.75	3.01	0	0
ILMN_2737390	Moxd1	10	24	rs13480546	10	23.97	Y	Y	7.6	28.66	11.43	16.25	3		rs13480531	10	20.49	0.91	0.19	0	0	0	0
ILMN_2676074	Amd1	10	40	rs13480581	10	38.65	Y	Y	24.39	26.96	10.3	27.77	13		rs13480581	10	38.69	0.34	0.82	0.4	2.13	0	0
ILMN_1257546	4930599N23Rik	6	39.1	rs13480601	10	43.99	N	N	32.83	0.16	1.5	4.57	2		rs13480601	10	44.03	1.29	0.42	0.03	0.26	0	0
ILMN_2651010	1700021K02Rik	10	60.6	rs13480620	10	59.58	Y	Y	32.04	32.8	29.93	34.43	1		rs13480620	10	59.65	0.8	2.8	0.56	0.47	0	0
ILMN_2639272	Ddx21	10	62	D10Mit196	10	61.18	Y	Y	82.53	88.75	125.06	67.65	1		rs13480621	10	59.9	7.82	2.73	0.52	3.5	0	0
ILMN_2666070	Tacr2	10	61.7	D10Mit196	10	61.18	Y	Y	34.43	37.32	26.13	31.01	1		rs13480621	10	59.9	0.2	0.42	0.04	0.78	0	0
ILMN_1212806	Plekhk1	10	67.5	rs13480631	10	67.4	Y	Y	37.55	44.79	43.22	36.76	1		rs3712063	10	67.55	18.54	25.1	27.51	30.7	11	0
ILMN_1233726	Rtkn2	10	67.5	rs13480631	10	67.4	Y	Y	66.42	65.53	51.7	45.86	1		rs3712063	10	67.55	37.94	46.06	18.62	34.31	13	0
ILMN_2474128	Zfp365	10	67.4	rs13480631	10	67.4	Y	Y	51.78	70.3	45.78	46.01	1		rs3712063	10	67.55	32.65	42.6	24.57	16.73	6	0
ILMN_1214006	1200015N20Rik	10	70	rs3679735	10	68.78	Y	Y	37.34	31.22	59.79	43.58	1		rs13480638	10	68.91	0.96	0.01	0	2.17	0	0
ILMN_1236010	Bicc1	10	70.4	rs3679735	10	68.78	Y	Y	63.32	73.4	102.9	57.29	1		rs13480638	10	68.91	1.64	0	2.37	3.15	0	0
ILMN_1252318	1200015N20Rik	10	69.9	rs3679735	10	68.78	Y	Y	72.84	68.44	87.49	61.04	1		rs13480638	10	68.91	0.07	0.34	1.53	2.93	0	0
ILMN_2661576	Bicc1	10	70.4	rs3679735	10	68.78	Y	Y	43	46.68	50.71	32.5	1		rs13480638	10	68.91	0.32	4.69	0.02	3.84	0	0
ILMN_1254367	Tmpo	10	90.6	rs13480700	10	89.94	Y	Y	24.79	31.35	23.99	26.86	13		mCV25373751	10	90.17	3.02	4.1	6.57	12.89	0	0
ILMN_2466335	Apaf1	10	90.5	rs13480700	10	89.94	Y	Y	50.11	46.3	47.03	32.34	1		mCV25373751	10	90.17	6.17	9.77	0.32	0.36	0	0
ILMN_2654916	B530045E10Rik	10	98.9	rs3704401	10	98.67	Y	Y	27.33	19.48	30.42	18.71	7		rs13480722	10	97.11	0.06	0	2.36	0.79	0	0
ILMN_1228104	Slc6a15	10	103	rs13480739	10	103.15	Y	Y	21.45	27.36	2.17	6.3	3		rs6246096	10	103.02	3.44	2.88	1.49	0.84	0	0
ILMN_1228540	6430590A10Rik	10	103	rs13480739	10	103.15	Y	Y	72.45	71.91	72.09	47.77	1		rs6246096	10	103.02	3.08	6.01	0.01	0.02	0	0
ILMN_1258070	6820437F20Rik	10	105	rs13480739	10	103.15	Y	Y	32.3	39.08	52.72	38.61	1		rs6246096	10	103.02	5.28	3.97	2.68	9.02	0	0
ILMN_1248537	Dusp6	10	98.7	CEL-10_109935001	10	109.66	Y	N	30.47	8.93	7.97	8.59	2		mCV24654052	10	109.91	0.25	0.73	1.47	4.65	0	0
ILMN_1241448	Lgr5	10	115	rs4228477	10	114.48	Y	Y	26.59	27.51	46.63	36.15	1		rs4228477	10	114.52	0.2	0.4	0.11	0.28	0	0
ILMN_2665459	Ptprr	10	116	rs13480776	10	115.32	Y	Y	15.35	27.05	6.33	24.3	10		rs13480775	10	115.24	0.02	4.54	0.25	0.02	0	0
ILMN_1250774	Mdm2	10	117	CZECH-10_116791624	10	116.4	Y	Y	17.97	24.94	21.27	29.82	10		rs13480778	10	116.78	0	0.85	0.18	0	0	0
ILMN_2619574	Slc35e3	10	117	CZECH-10_116791624	10	116.4	Y	Y	96.55	100.45	77.35	100.41	1		rs13480778	10	116.78	1.02	1.18	1.26	1.7	0	0
ILMN_2574920	Grip1	10	119	rs3659070	10	119.47	Y	Y	61.02	66.45	56.42	60.63	1		rs3659070	10	119.5	0.71	0	0.56	0.03	0	0
ILMN_1233501	C530027B15Rik	19	32.2	rs13480796	10	121.23	N	N	24.61	5.94	2.14	0.92	2		rs13480796	10	121.26	0.23	0.35	0.1	0.05	0	0
ILMN_1244851	Usp15	10	123	rs13480796	10	121.23	Y	Y	45.72	10.52	23.24	15.46	2		rs13480796	10	121.26	3.24	0.22	0.65	3.64	0	0
ILMN_1254959	4930505D03Rik	10	121	rs13480796	10	121.23	Y	Y	26.05	26.07	28.74	11.62	12		rs13480796	10	121.26	0.03	0.68	6.76	2.38	0	0
ILMN_1213273	Lrig3	10	125	rs13480815	10	125.42	Y	Y	21.68	26.43	25.82	23.45	9		rs6281696	10	125.02	4.77	1.36	7.25	4.18	0	0
ILMN_1224942	Shmt2	10	127	rs13480815	10	125.42	Y	Y	14.85	33.19	25.33	36.86	15		rs6281696	10	125.02	0	1.68	1.72	0.12	0	0
ILMN_1231540	Lrig3	10	125	rs13480815	10	125.42	Y	Y	66.11	49.74	48.87	54.63	1		rs6281696	10	125.02	5.46	13.23	1.32	10.72	0	0
ILMN_1241182	B4galnt1	10	127	rs13480815	10	125.42	Y	Y	64.24	67.48	62.28	60.46	1		rs6281696	10	125.02	5.03	12.69	6.79	3.52	0	0
ILMN_1257015	C78409	10	127	rs13480815	10	125.42	Y	Y	40.79	47.88	33.27	35.64	1		rs6281696	10	125.02	0.64	9.58	1.39	3.8	0	0
ILMN_2505061	A730063M14Rik	10	127	rs13480815	10	125.42	Y	Y	56.96	59.81	36.59	54.37	1		rs6281696	10	125.02	5.59	12.34	1.54	12.55	0	0
ILMN_2509830	A730063M14Rik	10	127	rs13480815	10	125.42	Y	Y	61.87	63.54	38.71	49.81	1		rs6281696	10	125.02	6.89	9.96	1.12	9.19	0	0
ILMN_2565262	Lrig3	10	125	rs13480815	10	125.42	Y	Y	53.73	48.88	50.77	52.91	1		rs6281696	10	125.02	13.02	9.54	1.83	7.88	0	0
ILMN_1217147	ENSMUSG00000053792	11	6.04	rs6163251	11	5.86	Y	Y	61.37	48.95	63.99	26.08	1		rs3659787	11	4.41	1.2	0.19	0.65	0.02	0	0
ILMN_1246405	Ykt6	11	5.87	rs6163251	11	5.86	Y	Y	28.68	29.76	33.68	15.31	12		rs3659787	11	4.41	0.24	0	1.12	1.43	0	0
ILMN_2491469	Tns3	11	8.45	rs13480856	11	7.85	Y	Y	86.4	106.88	106.68	60.34	1		rs3714397	11	8.74	1.12	0.27	0.09	0.02	0	0
ILMN_2479708	9130230N09Rik	11	22.8	rs3707185	11	19.88	Y	Y	25.33	41.5	23.49	36.92	13		rs3707185	11	19.88	9.1	11.31	5.6	7.09	0	0
ILMN_1252073	LOC380689	11	25.6	rs13480921	11	25.67	Y	Y	23.08	49.39	49.8	29.98	15		mCV23508321	11	26.19	35.46	56.93	37.19	32.98	1	0
ILMN_1220311	Vrk2	11	26.5	rs3703534	11	32.01	Y	N	20.38	37.29	16.24	17.4	3		rs13480950	11	33.39	17.46	7.09	6.16	8.41	0	0
ILMN_1230423	Sh3pxd2b	11	32.3	rs3703534	11	32.01	Y	Y	35.07	36.3	19.63	22.6	6		rs13480950	11	33.39	1	0.01	2.34	1.69	0	0
ILMN_1238389	2310022M17Rik	11	31.6	rs3703534	11	32.01	Y	Y	62.6	78.96	75	60.91	1		rs13480950	11	33.39	0.7	0.23	0	1.8	0	0
ILMN_2569532	Nsg2	11	31.9	rs3703534	11	32.01	Y	Y	63.93	87.53	77.36	56.71	1		rs13480950	11	33.39	3.97	0.09	4.75	0.11	0	0
ILMN_2647458	1700007I06Rik	11	32.4	rs3703534	11	32.01	Y	Y	34.59	28.61	3.06	21.57	6		rs13480950	11	33.39	0.75	0.03	0.1	0.15	0	0
ILMN_2673980	Hbq1	11	32.2	rs3703534	11	32.01	Y	Y	76.35	88.66	93.26	61.04	1		rs13480950	11	33.39	58.66	57.86	35.17	50.66	1	1
ILMN_2689307	Spnb2	11	30	rs3703534	11	32.01	Y	Y	9.43	14.41	28.49	10.2	4		rs13480950	11	33.39	0.13	3.25	2.74	0.03	0	0
ILMN_2752327	Pank3	11	35.6	D11Mit173	11	33.87	Y	Y	50.95	68.65	57.16	45.72	1		rs13480951	11	33.54	0.52	1.56	0.93	0.88	0	0
ILMN_1221130	Irf1	11	53.6	gnf11.055.501	11	53.76	Y	Y	22.33	25.71	17.18	26.27	10		gnf11.055.501	11	53.73	3.43	2.11	1.13	0.09	0	0
ILMN_1223035	Slc22a4	11	53.8	gnf11.055.501	11	53.76	Y	Y	101.87	102.52	91.92	100.1	1		gnf11.055.501	11	53.73	22.37	20.1	18.6	27.77	5	0
ILMN_1228123	Tnip1	11	54.8	gnf11.055.501	11	53.76	Y	Y	31.58	25.18	14.24	21.62	6		gnf11.055.501	11	53.73	14.62	17.66	30.11	25.4	4	0
ILMN_1234533	Slc22a21	11	53.8	gnf11.055.501	11	53.76	Y	Y	28.99	25.59	10.18	13	6		gnf11.055.501	11	53.73	7.79	22.44	17.51	0.81	0	0
ILMN_1243212	Sparc	11	55.2	gnf11.055.501	11	53.76	Y	Y	73.1	88.46	75.54	95.59	1		gnf11.055.501	11	53.73	15.48	16.37	10.15	9.64	0	0
ILMN_1248802	Gria1	11	57.1	gnf11.055.501	11	53.76	Y	Y	13.3	25.36	17.37	43.02	10		gnf11.055.501	11	53.73	4.07	9	7.41	4.97	0	0
ILMN_2417863	Tnip1	11	54.7	gnf11.055.501	11	53.76	Y	Y	66.87	74.62	60.62	92.89	1		gnf11.055.501	11	53.73	22.83	20.04	20.57	23.97	0	0
ILMN_2500491	Lyrm7	11	54.7	gnf11.055.501	11	53.76	Y	Y	90.37	89.34	80.48	64.19	1		gnf11.055.501	11	53.73	19.95	20.42	15.68	17.25	0	0
ILMN_2648006	Gria1	11	57.1	gnf11.055.501	11	53.76	Y	Y	15.49	30.07	33.42	44.31	15		gnf11.055.501	11	53.73	3.05	11.78	6.13	9.98	0	0
ILMN_1251423	2010001A14Rik	11	57.6	rs3023265	11	57.58	Y	Y	58.47	72.14	67.74	81.38	1		rs13481044	11	57.64	27.62	37.1	24.98	28.21	13	0
ILMN_2601118	Atpaf2	11	60.2	rs3023265	11	57.58	Y	Y	15.22	29.5	6.11	27.72	10		rs13481044	11	57.64	3.91	0.08	0.16	0.01	0	0
ILMN_2734789	Sh3bp5l	11	58.2	rs3023265	11	57.58	Y	Y	28.51	8.3	15.19	16.86	2		rs13481044	11	57.64	0.96	2.1	3.28	1.27	0	0
ILMN_2774825	G3bp1	11	55.3	rs3023265	11	57.58	Y	Y	24.15	11.1	5.23	14.73	2		rs13481044	11	57.64	6.43	2.73	4.89	0.59	0	0
ILMN_1213483	Flcn	11	59.6	rs13481045	11	58.06	Y	Y	28.71	38.88	24.75	34.01	1		rs13481045	11	58.06	0.23	1.94	0.02	0.41	0	0
ILMN_1216748	Nt5m	11	59.7	rs13481045	11	58.06	Y	Y	27.83	33.94	23.27	21.65	6		rs13481045	11	58.06	0.62	0.35	0.02	0.03	0	0
ILMN_1218678	Cops3	11	59.6	rs13481045	11	58.06	Y	Y	52.22	45.44	30.03	31.44	1		rs13481045	11	58.06	0.89	4.5	0.11	0.23	0	0
ILMN_1220340	Zkscan17	11	59.3	rs13481045	11	58.06	Y	Y	58.63	75.24	74.54	68.96	1		rs13481045	11	58.06	1.98	0.56	0.22	0.11	0	0
ILMN_1223843	Jmjd4	11	59.3	rs13481045	11	58.06	Y	Y	61.55	103.26	65.9	65.76	1		rs13481045	11	58.06	1.01	0.1	1.66	0.83	0	0
ILMN_1238412	Shmt1	11	60.6	rs13481045	11	58.06	Y	Y	46.16	23.11	30.81	31.35	14		rs13481045	11	58.06	0.61	0.09	2.27	7.83	0	0
ILMN_1241611	Zfp39	11	58.7	rs13481045	11	58.06	Y	Y	26.74	32.9	40.93	38.61	1		rs13481045	11	58.06	8.68	10.19	4.76	3.9	0	0
ILMN_1249579	Top3a	11	60.6	rs13481045	11	58.06	Y	Y	32.18	39.79	24.53	36.36	1		rs13481045	11	58.06	4.68	0.51	3.87	1.21	0	0
ILMN_1251006	Lrrc48	11	60.2	rs13481045	11	58.06	Y	Y	35.41	53.08	28.33	27.17	1		rs13481045	11	58.06	1.75	0.31	0	0.01	0	0
ILMN_1254067	AA536749	11	59.6	rs13481045	11	58.06	Y	Y	48.58	65.02	69.62	45.75	1		rs13481045	11	58.06	2.41	0.01	4.47	0.14	0	0
ILMN_1255146	Dhrs7b	11	60.7	rs13481045	11	58.06	Y	Y	66.1	68.96	67.28	78.22	1		rs13481045	11	58.06	1	0.37	0.74	2.92	0	0
ILMN_1255259	Alkbh5	11	60.4	rs13481045	11	58.06	Y	Y	26.38	24.94	31.24	31.74	1		rs13481045	11	58.06	0.23	0.13	0.66	1.05	0	0
ILMN_2429484	4933439C10Rik	11	59.3	rs13481045	11	58.06	Y	Y	46.83	34.68	35.11	46.06	1		rs13481045	11	58.06	2	0.53	2	0.62	0	0
ILMN_2433166	4933439C10Rik	11	59.3	rs13481045	11	58.06	Y	Y	76.48	77.42	88.05	85.35	1		rs13481045	11	58.06	7.18	0.12	0.24	0.01	0	0
ILMN_2594644	Lrrc48	11	60.2	rs13481045	11	58.06	Y	Y	76.71	96.78	71.95	90.7	1		rs13481045	11	58.06	1.09	0.02	1.82	2.47	0	0
ILMN_2657546	Cops3	11	59.6	rs13481045	11	58.06	Y	Y	20.81	11.68	22.65	31.96	5		rs13481045	11	58.06	0.92	0.76	0.05	0.2	0	0
ILMN_2674668	2810021J22Rik	11	58.7	rs13481045	11	58.06	Y	Y	34.87	47.57	28.33	26.64	1		rs13481045	11	58.06	0.39	2.32	1.19	2.1	0	0
ILMN_2695900	Kcnj12	11	60.9	rs13481045	11	58.06	Y	Y	30.51	34.84	43.53	52.8	1		rs13481045	11	58.06	0	0.53	0.95	0	0	0
ILMN_2765593	Lrrc48	11	60.2	rs13481045	11	58.06	Y	Y	42.51	58.18	35.2	54.59	1		rs13481045	11	58.06	4.58	3.13	2.37	0	0	0
ILMN_1227371	Lrrc48	11	60.2	D11Mit318	11	62.02	Y	Y	13.23	27.29	8.45	11.7	3		mCV24123456	11	62.07	0.87	0	0.11	0.13	0	0
ILMN_2713969	B9d1	11	61.3	D11Mit318	11	62.02	Y	Y	29.01	18.64	11.33	24.31	8		mCV24123456	11	62.07	3.26	6.73	0.73	6.82	0	0
ILMN_2424555	Zkscan6	11	65.6	rs13481064	11	63.42	Y	Y	22.93	13.87	10.44	28.62	5		rs13481062	11	63.03	2.05	1.06	0.35	2.06	0	0
ILMN_2431398	2810001G20Rik	11	63.9	rs13481064	11	63.42	Y	Y	78.7	85.51	94.29	82.52	1		rs13481062	11	63.03	0.58	3.5	2.56	0.18	0	0
ILMN_2435360	Myocd	11	65	rs13481064	11	63.42	Y	Y	5.7	25.35	5.12	13.19	3		rs13481062	11	63.03	0.55	3.76	0.12	0.78	0	0
ILMN_1218036	Sco1	11	66.9	rs3713702	11	64.09	Y	Y	12.67	25.16	33.73	25.04	15		rs3695202	11	64.52	0.83	1.74	0.01	0	0	0
ILMN_1226476	2310004I24Rik	11	66.9	rs3713702	11	64.09	Y	Y	53.24	35.3	34.59	35.09	1		rs3695202	11	64.52	0.21	3.03	0.31	1.68	0	0
ILMN_1256927	2310040C09Rik	11	61.5	rs3713702	11	64.09	Y	Y	12.61	26.24	22.65	6.74	3		rs3695202	11	64.52	0.14	0	2.53	2.32	0	0
ILMN_2502931	Dnahc9	11	65.9	rs3713702	11	64.09	Y	Y	24.04	19.57	7.34	6.79	2		rs3695202	11	64.52	8.25	0.32	0.35	2.25	0	0
ILMN_1218504	Chdh	14	30.9	D11Mit5	11	67	N	N	26.58	0.08	2.55	0.04	2		rs3691200	11	67.09	0.43	2.79	0.87	1.15	0	0
ILMN_1223735	Myh8	11	67.1	D11Mit5	11	67	Y	Y	72.14	84.46	61.28	76.86	1		rs3691200	11	67.09	6.29	8.96	4.09	2.76	0	0
ILMN_1229465	Sesn2	4	132	D11Mit5	11	67	N	N	24.26	0.01	0.59	0	2		rs3691200	11	67.09	10.05	3.05	0.4	0.72	0	0
ILMN_2468473	Gas7	11	67.5	D11Mit5	11	67	Y	Y	12.7	29.74	10.62	19.16	3		rs3691200	11	67.09	7.19	3.14	1.71	3.33	0	0
ILMN_2485526	Klf12	14	100	D11Mit5	11	67	N	N	24.55	2.53	5.31	1.68	2		rs3691200	11	67.09	0.92	0.01	1.12	0	0	0
ILMN_2594049	Gtlf3b	11	60.7	D11Mit5	11	67	Y	N	31.33	6.09	0.87	9.91	2		rs3691200	11	67.09	0.27	1.17	0.13	2.27	0	0
ILMN_2689785	Cd68	11	69.5	D11Mit5	11	67	Y	Y	26.74	5.6	19.08	8.79	2		rs3691200	11	67.09	0.12	0	0.15	0.22	0	0
ILMN_1250888	Snx27	3	94.3	rs13481080	11	67.47	N	N	27.96	3.03	1.75	16.03	2		rs3718573	11	67.35	1.22	1.49	0.35	0	0	0
ILMN_1259842	Zfp142	1	74.5	rs13481080	11	67.47	N	N	29.67	0.71	2.83	3.48	2		rs3718573	11	67.35	0.03	5.32	0.56	0.42	0	0
ILMN_2655386	Kcnab3	11	69.2	rs13481080	11	67.47	Y	Y	50.51	36.46	19.96	34.92	13		rs3718573	11	67.35	1.89	0.17	0.3	1.97	0	0
ILMN_1231006	Trp53	11	69.4	rs13481081	11	67.97	Y	Y	85.68	69.88	72.65	83.13	1		rs3677986	11	67.96	1.66	5.31	0.09	0.43	0	0
ILMN_1235966	Alox12b	11	69	rs13481081	11	67.97	Y	Y	29.62	23.18	17.27	29.38	8		rs3677986	11	67.96	0.15	1.68	5.05	2.88	0	0
ILMN_2546624	Ndel1	11	68.6	rs13481081	11	67.97	Y	Y	41.19	43.5	35.43	30.65	1		rs3677986	11	67.96	61.3	64.73	55.31	56	1	1
ILMN_2567229	Stx8	11	68	rs13481081	11	67.97	Y	Y	26.56	26.79	30.6	20.46	12		rs3677986	11	67.96	1.86	0.67	0.01	3.93	0	0
ILMN_2665478	Alox8	11	69	rs13481081	11	67.97	Y	Y	20.65	59.93	28.66	19.12	9		rs3677986	11	67.96	26.16	41.65	14.23	10.54	6	0
ILMN_2710544	Stx8	11	67.9	rs13481081	11	67.97	Y	Y	10.73	18.72	35.39	12.91	4		rs3677986	11	67.96	0.2	0.15	0.07	0.23	0	0
ILMN_2748584	Dullard	11	69.8	rs13481081	11	67.97	Y	Y	10.11	12.81	32.72	19.12	4		rs3677986	11	67.96	14.66	15.72	21.54	9.97	0	0
ILMN_1225635	Senp3	11	69.5	mCV23528728	11	69.64	Y	Y	16.45	44.34	9.8	13.77	3		rs13481087	11	69.42	1.36	0.5	0.94	1.24	0	0
ILMN_1251178	Hs3st3b1	11	63.7	mCV23528728	11	69.64	Y	N	4.39	14.39	24.73	5.58	4		rs13481087	11	69.42	1.22	2.31	2.01	0.73	0	0
ILMN_2685125	Derl2	11	70.8	mCV23528728	11	69.64	Y	Y	81.82	95.02	85.07	79.82	1		rs13481087	11	69.42	0.17	2.84	0.94	4.11	0	0
ILMN_1213090	2010305C02Rik	11	75.3	rs13481093	11	72.37	Y	Y	49.81	47.49	33.47	42.88	1		UT_11_72.023897	11	72.27	1.91	1.92	0.01	1.65	0	0
ILMN_1216391	4930563E22Rik	11	72	rs13481093	11	72.37	Y	Y	30.82	35.04	37.22	35.34	1		UT_11_72.023897	11	72.27	5.07	15.96	8.33	5.97	0	0
ILMN_1217629	Itgae	11	73	rs13481093	11	72.37	Y	Y	45.12	64.77	56.96	66.59	1		UT_11_72.023897	11	72.27	13.04	15.24	4.07	3.33	0	0
ILMN_1233283	P2rx5	11	73	rs13481093	11	72.37	Y	Y	19.22	16.86	24.53	19.1	4		UT_11_72.023897	11	72.27	9.01	22.53	4.95	5.5	0	0
ILMN_1245850	4933427D14Rik	11	72	rs13481093	11	72.37	Y	Y	43.92	46.18	46.89	46	1		UT_11_72.023897	11	72.27	2.31	0.5	1.33	4.5	0	0
ILMN_2482949	Pitpnm3	11	71.9	rs13481093	11	72.37	Y	Y	27.63	28.44	31.23	24.02	1		UT_11_72.023897	11	72.27	24.83	31.65	22.97	16.7	3	0
ILMN_2653284	Ctns	11	73	rs13481093	11	72.37	Y	Y	58.82	40.11	37.36	38.56	1		UT_11_72.023897	11	72.27	1.45	0.68	0.04	0.22	0	0
ILMN_2754233	Sgsm2	11	74.7	rs13481093	11	72.37	Y	Y	3.21	17.39	20.74	24.57	5		UT_11_72.023897	11	72.27	0.72	3.92	0.41	0	0	0
ILMN_1226050	4931437C01Rik	8	93.8	gnf11.083.529	11	78.07	N	N	26.79	1.01	0.58	1.03	2		rs13481117	11	79.07	0.9	0.51	0.71	2.5	0	0
ILMN_2612880	Jhdm1d	6	39.1	gnf11.083.529	11	78.07	N	N	24.74	1.26	0.04	0.36	2		rs13481117	11	79.07	2.12	1.5	2.56	1.69	0	0
ILMN_2627705	Olfr1260	2	89.8	gnf11.083.529	11	78.07	N	N	24.45	0.16	0.16	1.13	2		rs13481117	11	79.07	0.12	0.08	0.12	0.1	0	0
ILMN_1248920	Omg	11	79.3	rs6401371	11	79.27	Y	Y	37.02	20.81	25.74	19.27	7		rs13481119	11	79.36	0.02	1.25	0	3.42	0	0
ILMN_1225672	Lhx1	11	84.3	rs3717361	11	82.68	Y	Y	18.8	21.9	30.01	23.98	4		rs6259742	11	82.42	0.43	0.31	0.02	0.01	0	0
ILMN_1242177	C230094I18Rik	11	83.6	rs3717361	11	82.68	Y	Y	12.9	14.24	17.54	25.01	5		rs6259742	11	82.42	10.99	20.61	7.71	15.41	0	0
ILMN_1253919	Ccl3	11	83.5	rs3717361	11	82.68	Y	Y	7.57	25.48	9.15	15.96	3		rs6259742	11	82.42	0.87	9.53	5.31	3.14	0	0
ILMN_2669146	Ap1gbp1	11	83.9	rs3717361	11	82.68	Y	Y	31.47	31.45	31.63	25.63	1		rs6259742	11	82.42	0	2.37	1.72	0.84	0	0
ILMN_1222291	Rps6kb1	11	86.3	rs3724750	11	85.49	Y	Y	29	29.99	7.43	9.68	6		rs6365608	11	85.26	16.58	24.09	16.48	11.85	0	0
ILMN_1226504	Ppm1d	11	85.1	rs3724750	11	85.49	Y	Y	35.47	34.51	24.03	39.86	1		rs6365608	11	85.26	5.16	1.39	0.54	2.43	0	0
ILMN_1229454	Cuedc1	11	88	rs3724750	11	85.49	Y	Y	130.57	128.76	129.55	137.15	1		rs6365608	11	85.26	23.39	41.26	23.63	30.86	10	0
ILMN_1234842	Msi2	11	88.2	rs3724750	11	85.49	Y	Y	64.65	64.84	65.55	54.53	1		rs6365608	11	85.26	23.46	22.07	17.44	19.53	0	0
ILMN_1235678	Rps6kb1	11	86.3	rs3724750	11	85.49	Y	Y	38.63	20.24	18.32	33.17	8		rs6365608	11	85.26	8.73	24.77	7.59	4.36	0	0
ILMN_2464061	Tubd1	11	86.4	rs3724750	11	85.49	Y	Y	29.33	22.82	25.86	39.12	14		rs6365608	11	85.26	13.1	13.96	9.38	7.58	0	0
ILMN_2506229	Tubd1	11	86.4	rs3724750	11	85.49	Y	Y	36.11	44.27	40.65	46.57	1		rs6365608	11	85.26	14.05	17.47	6.65	14.33	0	0
ILMN_2690556	ENSMUSG00000055697	11	86.4	rs3724750	11	85.49	Y	Y	25.88	34.54	21.12	21.22	6		rs6365608	11	85.26	9.91	14.37	8.29	5.6	0	0
ILMN_1249785	C030037D09Rik	11	88.6	rs3659504	11	88.48	Y	Y	116.66	126.03	145	99.09	1		rs3659504	11	88.52	34.73	52.15	50.82	49.67	1	1
ILMN_2480463	Trim25	11	88.9	rs3659504	11	88.48	Y	Y	26.56	14.05	9.99	20.22	2		rs3659504	11	88.52	14.11	15.15	3.07	7.71	0	0
ILMN_2746870	Nog	11	89.2	rs3659504	11	88.48	Y	Y	39.54	28.85	24.78	30.94	1		rs3659504	11	88.52	20.69	39.42	22.26	20.58	3	0
ILMN_2753444	Stxbp4	11	90.4	rs13481156	11	90.62	Y	Y	17.5	26.81	10.23	15.64	3		rs13481156	11	90.66	15.86	16.99	8.98	17.39	0	0
ILMN_1235654	Teddm1	1	156	rs13481157	11	91.22	N	N	1.97	0.01	26.59	0.02	4		gnf11.098.224	11	91.48	0.6	0.37	1.04	0.23	0	0
ILMN_1217638	Car10	11	93.4	rs3089065	11	92.98	Y	Y	28.6	18.39	24.24	19.69	7		gnf11.098.224	11	91.48	0.12	0.98	0.78	1.43	0	0
ILMN_1229777	Spag9	11	94	rs3089065	11	92.98	Y	Y	45.02	36.92	47.63	45.52	1		gnf11.098.224	11	91.48	0.16	0.01	0.44	0.47	0	0
ILMN_1253798	Spag9	11	93.9	rs3089065	11	92.98	Y	Y	75.68	74.02	70.86	81.8	1		gnf11.098.224	11	91.48	0.15	0.35	0.19	0.15	0	0
ILMN_1257999	Car10	11	93.4	rs3089065	11	92.98	Y	Y	18.79	25.29	32.07	30.98	15		gnf11.098.224	11	91.48	1.37	0.97	0.83	0.03	0	0
ILMN_3161676	G630016D24Rik	14	52.6	rs3089065	11	92.98	N	N	44.54	14.22	20.62	13.79	2		gnf11.098.224	11	91.48	0.13	0.28	0.41	2.08	0	0
ILMN_1224162	5730593F17Rik	11	95.2	D11Mit70	11	93.99	Y	Y	39.29	36.35	31.49	40.26	1		rs13481170	11	95.49	0	0.38	0.83	0.23	0	0
ILMN_1233328	Ube2z	11	95.9	D11Mit70	11	93.99	Y	Y	62.85	79.06	56.84	76.88	1		rs13481170	11	95.49	0.61	0.09	0.72	2.27	0	0
ILMN_1248215	Sgca	11	94.8	D11Mit70	11	93.99	Y	Y	21.32	17.36	7.03	27.36	5		rs13481170	11	95.49	0.45	0.6	4.86	1.13	0	0
ILMN_1258988	Igfbp4	11	98.9	D11Mit70	11	93.99	Y	Y	24.45	30.59	20.92	15.77	6		rs13481170	11	95.49	0.08	9.29	1.59	4.22	0	0
ILMN_2485774	Myst2	11	95.2	D11Mit70	11	93.99	Y	Y	27.48	22.98	14.03	10.88	2		rs13481170	11	95.49	0.37	0	0.27	0.61	0	0
ILMN_2589790	Stat3	11	101	D11Mit70	11	93.99	Y	N	24.51	26.94	9.62	15.83	6		rs13481170	11	95.49	0.93	0.37	0.24	0.87	0	0
ILMN_2616164	Itga3	11	94.9	D11Mit70	11	93.99	Y	Y	15.44	26.88	42.3	24.51	15		rs13481170	11	95.49	0.37	3.27	0	0.12	0	0
ILMN_2625736	B130006D01Rik	11	95.6	D11Mit70	11	93.99	Y	Y	85.56	97.08	88.86	118.41	1		rs13481170	11	95.49	21.64	36.13	20.41	38.71	10	0
ILMN_2665161	Myst2	11	95.1	D11Mit70	11	93.99	Y	Y	67.99	51.37	33.87	52.76	1		rs13481170	11	95.49	1.61	1.17	0.61	0.47	0	0
ILMN_2681592	Ankrd40	11	94.2	D11Mit70	11	93.99	Y	Y	49.09	56.68	44.22	41.37	1		rs13481170	11	95.49	0.06	0.56	0.05	0.16	0	0
ILMN_2691298	Mrpl27	11	94.5	D11Mit70	11	93.99	Y	Y	90.56	99.17	97.96	84.68	1		rs13481170	11	95.49	0.12	1	0.7	0	0	0
ILMN_2713686	Pnpo	11	96.8	D11Mit70	11	93.99	Y	Y	26.57	28.87	6.9	13.96	6		rs13481170	11	95.49	0.09	0.53	0.15	0.01	0	0
ILMN_2737658	Pdk2	11	94.9	D11Mit70	11	93.99	Y	Y	68.85	81.68	41.51	57.25	1		rs13481170	11	95.49	2.24	0.21	2.71	0.03	0	0
ILMN_1214817	D030028A08Rik	11	96.8	UT_11_95.85971	11	96.09	Y	Y	81.62	86.16	79.99	82.71	1		rs3710148	11	96.39	0.3	1.03	0.06	0	0	0
ILMN_1224032	Skap1	11	96.6	UT_11_95.85971	11	96.09	Y	Y	87.32	71.28	62.95	65.8	1		rs3710148	11	96.39	0.2	0.13	2.88	0.07	0	0
ILMN_1237335	B230217C12Rik	11	97.7	UT_11_95.85971	11	96.09	Y	Y	155.01	161.31	143.61	134.15	1		rs3710148	11	96.39	1.61	0.9	0.41	1.63	0	0
ILMN_1240268	Fbxo47	11	97.7	UT_11_95.85971	11	96.09	Y	Y	33.88	22.85	23.07	25.51	8		rs3710148	11	96.39	0.03	0	0.53	0	0	0
ILMN_1248298	Plxdc1	11	97.8	UT_11_95.85971	11	96.09	Y	Y	26.32	2.8	21.97	13.97	2		rs3710148	11	96.39	6.75	0.03	0	0.7	0	0
ILMN_1250569	Rapgefl1	11	98.7	UT_11_95.85971	11	96.09	Y	Y	98.53	87.3	71.02	95.89	1		rs3710148	11	96.39	6.46	20.26	3.76	14.2	0	0
ILMN_1252991	B230217C12Rik	11	97.7	UT_11_95.85971	11	96.09	Y	Y	169.54	182.48	138.39	144.46	1		rs3710148	11	96.39	0.34	0.92	0.06	0.77	0	0
ILMN_1258571	Sp6	11	96.9	UT_11_95.85971	11	96.09	Y	Y	90.7	74.34	78.12	70.04	1		rs3710148	11	96.39	9.31	9.09	5.25	2.26	0	0
ILMN_2476005	D030028A08Rik	11	96.8	UT_11_95.85971	11	96.09	Y	Y	84.02	84.77	84.24	65.52	1		rs3710148	11	96.39	3.66	0.65	1.43	0	0	0
ILMN_2476272	Osbpl7	11	96.9	UT_11_95.85971	11	96.09	Y	Y	27.21	5.75	29.88	6.03	7		rs3710148	11	96.39	0.44	1.05	0.3	1.63	0	0
ILMN_2498471	Ptrf	11	101	UT_11_95.85971	11	96.09	Y	Y	91.46	93.28	91.15	88.21	1		rs3710148	11	96.39	0	0.05	1.1	0	0	0
ILMN_2505553	B230217C12Rik	11	97.7	UT_11_95.85971	11	96.09	Y	Y	47.69	21.23	26.83	30.03	14		rs3710148	11	96.39	1.34	1.6	0.07	4.37	0	0
ILMN_2525502	LOC224048	16	21.9	UT_11_95.85971	11	96.09	N	N	44.45	34.89	40.64	20.57	12		rs3710148	11	96.39	0.02	4.79	1.41	0.11	0	0
ILMN_2547125	2810474C18Rik	11	97.6	UT_11_95.85971	11	96.09	Y	Y	53.04	59.92	53.23	49.54	1		rs3710148	11	96.39	3.59	1.33	0.58	0.7	0	0
ILMN_2668369	Mrpl45	11	97.2	UT_11_95.85971	11	96.09	Y	Y	24.05	44.07	26.08	30.43	1		rs3710148	11	96.39	0.08	0	0.21	2.43	0	0
ILMN_2676208	Hap1	11	100	UT_11_95.85971	11	96.09	Y	Y	37.09	23.03	24.26	24.4	14		rs3710148	11	96.39	1.24	0.31	2.85	0.15	0	0
ILMN_2687011	Krt12	11	99.3	UT_11_95.85971	11	96.09	Y	Y	78.93	68.14	69.75	60.75	1		rs3710148	11	96.39	13.85	19.87	12.07	14.9	0	0
ILMN_2692341	Scrn2	11	96.9	UT_11_95.85971	11	96.09	Y	Y	68.27	43.01	45.53	52.49	1		rs3710148	11	96.39	0.05	3.95	0.12	0.08	0	0
ILMN_2729097	Fbxl20	11	98	UT_11_95.85971	11	96.09	Y	Y	26.08	22.74	31.49	22.25	7		rs3710148	11	96.39	3.33	5.97	6.78	1.58	0	0
ILMN_2737412	Lrrc46	11	96.9	UT_11_95.85971	11	96.09	Y	Y	65.29	72.18	53.97	70.07	1		rs3710148	11	96.39	2.52	3.28	0.14	0.52	0	0
ILMN_2748165	Krt9	11	100	UT_11_95.85971	11	96.09	Y	Y	55.43	47.81	40.48	45.29	1		rs3710148	11	96.39	0.77	1.44	1.28	4.55	0	0
ILMN_2773169	Grb7	11	98.3	UT_11_95.85971	11	96.09	Y	Y	5.07	30.18	5.91	7.77	3		rs3710148	11	96.39	0.65	2.63	0.13	0.27	0	0
ILMN_3161676	G630016D24Rik	14	52.6	UT_11_95.85971	11	96.09	N	N	32.85	20.53	40.42	29.88	14		rs3710148	11	96.39	1.46	1.24	0.47	1.55	0	0
ILMN_1219084	1700052K11Rik	11	105	rs8265673	11	102.17	Y	Y	23.81	29.18	18.73	16.88	3		rs13481196	11	102.12	3.57	12.95	3.49	9.41	0	0
ILMN_1232804	Skap1	11	96.6	rs8265673	11	102.17	Y	N	15.06	7.28	25.86	8.41	4		rs13481196	11	102.12	0.46	0.2	2.06	1.23	0	0
ILMN_1247240	Ccdc43	11	103	rs8265673	11	102.17	Y	Y	36.87	49.69	44.73	49.96	1		rs13481196	11	102.12	1.05	0.07	0.08	0.01	0	0
ILMN_1256538	Smarce1	11	0	rs8265673	11	102.17	Y	N	12.78	27.46	24.41	12.27	9		rs13481196	11	102.12	0.73	0.02	2.14	0.85	0	0
ILMN_2568767	Tanc2	11	106	rs8265673	11	102.17	Y	Y	45.03	39.58	40.05	44.34	1		rs13481196	11	102.12	12.27	17.58	13.71	6.64	0	0
ILMN_1221953	Hexim2	11	103	rs13481216	11	107.23	Y	Y	7.24	26.56	5.35	6.59	3		rs13481216	11	107.27	1.88	0.19	2.45	0.57	0	0
ILMN_2725698	Cacng5	11	108	rs13481216	11	107.23	Y	Y	45.66	39.66	51.12	64.47	1		rs13481216	11	107.27	38.24	48.25	50.69	49.5	1	1
ILMN_1217890	Prkca	11	108	rs3669823	11	107.78	Y	Y	52.11	38.33	35.7	26.69	1		rs3669823	11	107.83	9.45	25.12	19.51	16.33	0	0
ILMN_1216553	Rgs9	11	109	rs3683086	11	109.15	Y	Y	6.47	25.74	15.18	19.3	3		rs13481224	11	109.28	0.19	14	7.23	8.42	0	0
ILMN_1250689	Rgs9	11	109	rs3683086	11	109.15	Y	Y	37.37	64.96	39.97	48.31	1		rs13481224	11	109.28	29.66	41.83	19.3	16.28	6	0
ILMN_2622016	Fgf14	14	124	rs3683086	11	109.15	N	N	24.52	4.2	0.04	0.4	2		rs13481224	11	109.28	4.61	2.12	1.81	0.98	0	0
ILMN_1220423	Nt5dc1	10	34	rs13481227	11	110.27	N	N	0.36	0.77	0.07	24.73	5		rs13481224	11	109.28	0.57	0	3.57	0.43	0	0
ILMN_1223933	Ush1g	11	115	D11Mit338	11	115.28	Y	Y	19.78	25.41	18.88	19.55	3		rs13481248	11	115.99	0.62	0.52	0.37	0.09	0	0
ILMN_1231168	9430068D06Rik	11	116	rs3662930	11	115.34	Y	Y	23.78	39.38	27.42	40.57	15		rs13481248	11	115.99	0.1	0.95	1.39	2.58	0	0
ILMN_1252144	Mif4gd	11	115	rs3662930	11	115.34	Y	Y	68.23	68.57	80.4	54.41	1		rs13481248	11	115.99	16.87	30.11	13.77	28.9	10	0
ILMN_1233894	Dtnb	12	3.72	rs13481276	12	3.78	Y	Y	15.23	34.15	14.67	11.69	3		rs13481282	12	5.95	0.21	2.68	0.16	0	0	0
ILMN_1238607	C030014M07Rik	12	4.03	rs13481276	12	3.78	Y	Y	54.38	102.62	65.55	52.24	1		rs13481282	12	5.95	0.04	3.55	0.53	0.18	0	0
ILMN_1255040	4930417G10Rik	12	4.74	rs13481276	12	3.78	Y	Y	19.7	38.55	35.97	25.84	15		rs13481282	12	5.95	0.17	0.18	0.06	1.15	0	0
ILMN_1228349	Itsn2	12	4.72	rs13481281	12	5.74	Y	Y	14.45	15.02	25.45	6.09	4		rs13481282	12	5.95	0.52	0	0.53	0.38	0	0
ILMN_2475689	Oca2	7	63.8	rs6278204	12	6.07	N	N	10.87	16.93	12.18	25.15	5		rs13481282	12	5.95	2.34	0.14	4.18	1.2	0	0
ILMN_1244726	A530016L24Rik	12	114	rs4217527	12	7.43	Y	N	0.02	0	1.37	24.69	5		rs13481285	12	7.02	0.41	0.29	0.2	9.58	0	0
ILMN_1259352	LOC386154	16	68.1	rs4217527	12	7.43	N	N	17.01	24.83	23.97	18.56	3		rs13481285	12	7.02	1.49	3.18	2.13	4.43	0	0
ILMN_2768992	Hs1bp3	12	8.35	rs13481290	12	8.12	Y	Y	42.96	46.89	37.77	42.58	1		rs13481285	12	7.02	0.15	1.91	4.93	0.01	0	0
ILMN_1256331	D230029K13Rik	17	33.8	rs6176675	12	9.24	N	N	13.77	14.65	31.6	10.64	4		rs3688676	12	10.23	4.87	8.24	1.29	0.7	0	0
ILMN_1259787	Osr1	12	9.59	rs6176675	12	9.24	Y	Y	23.92	26.76	29.87	15.88	9		rs3688676	12	10.23	1.12	0.4	0.93	2.33	0	0
ILMN_2730701	Pqlc3	12	17	rs6176675	12	9.24	Y	N	8.69	8.37	31.74	2.17	4		rs3688676	12	10.23	0.12	1.29	0.02	0.01	0	0
ILMN_2438724	Vsnl1	12	11.3	rs3688676	12	10.25	Y	Y	30.01	31.8	42.77	36.74	1		rs3688676	12	10.23	0.04	0.17	0.28	2.54	0	0
ILMN_1232948	IgK	6	67.8	rs3692433	12	13.14	N	N	0.02	0.49	0.62	24.58	5		rs13481305	12	12.8	0.2	0.01	1.9	3.72	0	0
ILMN_1246580	2410004P03Rik	12	17	rs3692433	12	13.14	Y	Y	8.68	26.02	9.69	12.07	3		rs13481305	12	12.8	4.14	0.86	7.78	1.57	0	0
ILMN_2639189	Isoc2b	7	4.8	rs3692433	12	13.14	N	N	21.81	28.52	17.91	21.43	3		rs13481305	12	12.8	2.94	0.64	0.14	5.63	0	0
ILMN_1244260	Atp6v1c2	12	17.3	rs13481319	12	16.17	Y	Y	41.77	35.28	41.64	27.15	1		gnf12.013.284	12	15.96	32.26	19.71	6.98	14.94	2	0
ILMN_1259352	LOC386154	16	68.1	rs13481319	12	16.17	N	N	27.67	20	24.46	32.5	14		gnf12.013.284	12	15.96	4.48	6.5	2.29	2.73	0	0
ILMN_2749327	Pqlc3	12	17	rs13481319	12	16.17	Y	Y	24.73	25.92	28.58	11.97	12		gnf12.013.284	12	15.96	0.16	0.13	0.23	3.73	0	0
ILMN_2769234	Ntsr2	12	16.7	rs13481319	12	16.17	Y	Y	16.02	24.25	17.37	10.99	3		gnf12.013.284	12	15.96	40.74	39.59	33.36	34.76	1	0
ILMN_1213848	Ddef2	12	21.3	rs6376853	12	16.32	Y	Y	67.08	67.38	75.53	55.31	1		rs3694821	12	16.59	3.06	5.04	7.25	7.88	0	0
ILMN_1224252	9030624G23Rik	12	24.7	rs6376853	12	16.32	Y	N	24.67	30.43	20.56	26.76	13		rs3694821	12	16.59	1.33	10.49	10.95	4.71	0	0
ILMN_1226890	5730507C01Rik	12	18.5	rs6376853	12	16.32	Y	Y	24.21	35.87	27.12	24.03	1		rs3694821	12	16.59	3.85	7.37	0.29	3.58	0	0
ILMN_1228131	LOC385289	12	21.4	rs6376853	12	16.32	Y	N	42.09	53.52	47.46	48.78	1		rs3694821	12	16.59	0.44	0	0.56	1.25	0	0
ILMN_1235060	Pdia6	12	17.3	rs6376853	12	16.32	Y	Y	42.39	35.15	38.02	37.7	1		rs3694821	12	16.59	1.57	1.44	1.34	0.16	0	0
ILMN_1236845	Gfod2	8	108	rs6376853	12	16.32	N	N	24.35	11.52	13.05	16.48	2		rs3694821	12	16.59	0.07	0.32	0.43	2.66	0	0
ILMN_1237758	LOC382153	12	18	rs6376853	12	16.32	Y	Y	33.41	27.18	30.72	50.87	1		rs3694821	12	16.59	0.93	0.69	0.17	4.61	0	0
ILMN_1240030	Nfatc3	8	109	rs6376853	12	16.32	N	N	22.2	9.38	18.35	25.33	5		rs3694821	12	16.59	0.69	3.17	2.57	0.1	0	0
ILMN_1243942	Adam17	12	21.3	rs6376853	12	16.32	Y	N	54.29	45.25	63.53	54.34	1		rs3694821	12	16.59	65.75	67.06	41.71	58.75	1	1
ILMN_1244101	LOC209182	12	19.7	rs6376853	12	16.32	Y	Y	40.77	42.51	33.29	19.29	12		rs3694821	12	16.59	13.56	19.17	12.05	17.8	0	0
ILMN_1246419	Grhl1	12	25.3	rs6376853	12	16.32	Y	N	41.7	28.47	44.02	38.93	1		rs3694821	12	16.59	16.35	18.3	0.51	8.16	0	0
ILMN_1250956	Prune2	19	17.3	rs6376853	12	16.32	N	N	26.73	15.85	16.15	12.78	2		rs3694821	12	16.59	2.24	0.28	0	0.22	0	0
ILMN_1253173	E2f6	12	16.8	rs6376853	12	16.32	Y	Y	62.11	61.07	72.44	52.23	1		rs3694821	12	16.59	50	77.04	38.57	64.12	1	1
ILMN_1256181	Nol10	12	17.4	rs6376853	12	16.32	Y	Y	37.17	25.75	47.46	31.78	1		rs3694821	12	16.59	29.47	18.95	36.98	18.9	7	0
ILMN_1259352	LOC386154	16	68.1	rs6376853	12	16.32	N	N	30.96	21.54	29.08	26.47	14		rs3694821	12	16.59	4.48	6.5	2.29	2.73	0	0
ILMN_2468982	3110053B16Rik	12	20.9	rs6376853	12	16.32	Y	Y	34.72	27.88	42.21	33.72	1		rs3694821	12	16.59	25.6	25.63	25.47	21.64	0	0
ILMN_2489360	Pdia6	12	17.3	rs6376853	12	16.32	Y	Y	37.79	40.03	42.95	33.58	1		rs3694821	12	16.59	1.68	2.88	1.31	6.29	0	0
ILMN_2509674	1700030C10Rik	12	20.8	rs6376853	12	16.32	Y	Y	17.56	26.13	20.18	14.09	3		rs3694821	12	16.59	23.18	34.31	14.47	22.17	3	3
ILMN_2535566	LOC382691	12	19.7	rs6376853	12	16.32	Y	Y	53.45	64.49	64.14	49.34	1		rs3694821	12	16.59	0.74	0.16	0.49	5.29	0	0
ILMN_2542320	LOC385177	12	23	rs6376853	12	16.32	Y	N	37.09	33.83	35.95	27.02	1		rs3694821	12	16.59	0.01	3.57	0.93	2.53	0	0
ILMN_2542476	Ddef2	12	21.3	rs6376853	12	16.32	Y	Y	32.89	36.07	18.72	19.81	6		rs3694821	12	16.59	0.03	1.17	3.05	1.3	0	0
ILMN_2608903	2900060N12Rik	12	0	rs6376853	12	16.32	Y	N	63.33	64.88	58.31	49.35	1		rs3694821	12	16.59	41.71	59.91	44.32	44.01	1	1
ILMN_2620803	Iah1	12	21.3	rs6376853	12	16.32	Y	N	37.89	27.8	28.76	37.46	1		rs3694821	12	16.59	0.56	0	6.48	0.91	0	0
ILMN_2657243	Kcnf1	12	17.2	rs6376853	12	16.32	Y	Y	35.73	35.55	28.37	24.99	1		rs3694821	12	16.59	31.41	36.45	28.25	24.14	12	0
ILMN_2669361	Fggy	4	95.59	rs6376853	12	16.32	N	N	68.63	76.81	84.41	52.6	1		rs3694821	12	16.59	88.2	101.63	70.66	98.65	1	1
ILMN_2695190	1700019G17Rik	6	85.9	rs6376853	12	16.32	N	N	9.08	25.54	1.55	4.37	3		rs3694821	12	16.59	8.61	19.34	3.56	1.98	0	0
ILMN_2730831	4921517L17Rik	2	156	rs6376853	12	16.32	N	N	41.68	53.89	52.26	41.99	1		rs3694821	12	16.59	0.01	0.21	0.04	0	0	0
ILMN_2758803	1700019G17Rik	6	85.9	rs6376853	12	16.32	N	N	38.99	36.81	41.18	35.47	1		rs3694821	12	16.59	73.58	76.65	50.16	68.36	1	1
ILMN_2772515	Hpcal1	12	17.8	rs6376853	12	16.32	Y	Y	42.66	42.94	36.65	39.93	1		rs3694821	12	16.59	20.97	29.48	30.65	29.63	15	0
ILMN_1214848	Mboat2	12	25.6	rs4229284	12	25.68	Y	Y	19.81	14.06	12.41	24.98	5		rs4229284	12	25.78	36.66	57.46	22.71	19.68	6	0
ILMN_1229343	Mboat2	12	25.6	rs4229284	12	25.68	Y	Y	67.84	65.68	66.15	59.97	1		rs4229284	12	25.78	81.11	89.31	62.27	58.08	1	1
ILMN_1236868	Id2	12	25.8	rs4229284	12	25.68	Y	Y	36.1	18.66	35.15	30.75	14		rs4229284	12	25.78	22.34	18.99	8.58	15.57	0	0
ILMN_2594718	Adam17	12	21.3	rs4229284	12	25.68	Y	Y	55.1	26.16	41.89	25.54	1		rs4229284	12	25.78	23.12	40.03	18.05	8.58	3	0
ILMN_1225204	Rsad2	12	27.1	rs6401555	12	27.03	Y	Y	25.03	13.82	6.69	20.17	2		rs4229294	12	26.99	22.76	13.68	14.04	8.93	0	0
ILMN_1230665	EG636791	12	27.8	rs6401555	12	27.03	Y	Y	23.24	19.45	20.3	31.19	5		rs4229294	12	26.99	12.12	10.11	11.5	14.77	0	0
ILMN_1231567	Adi1	12	29.4	rs6401555	12	27.03	Y	Y	22.13	46.02	24.3	26.71	15		rs4229294	12	26.99	4.49	10.36	3.41	10.43	0	0
ILMN_1237446	Ttc15	12	29.4	rs6401555	12	27.03	Y	Y	11.75	20.1	9.5	30.61	5		rs4229294	12	26.99	0.37	0.02	0.21	2.25	0	0
ILMN_1246871	Ttc15	12	29.4	rs6401555	12	27.03	Y	Y	113.23	121.6	98.66	115.5	1		rs4229294	12	26.99	53.9	47.05	25.45	28.54	13	0
ILMN_1256161	Myt1l	12	30.5	rs6401555	12	27.03	Y	Y	156.35	131.18	97.34	145.17	1		rs4229294	12	26.99	36.65	31.02	27.2	44.1	1	1
ILMN_2445049	Ttc15	12	29.4	rs6401555	12	27.03	Y	Y	99.27	94.9	81.03	99.69	1		rs4229294	12	26.99	32.92	35.21	26.03	38.56	1	1
ILMN_2502614	Ttc15	12	29.4	rs6401555	12	27.03	Y	Y	119.01	123.82	102.26	140.89	1		rs4229294	12	26.99	46.64	36.75	24.81	43.52	13	0
ILMN_2640542	Colec11	12	29.3	rs6401555	12	27.03	Y	Y	50.54	23.15	24.07	30.06	14		rs4229294	12	26.99	0.81	17.26	2.2	1.11	0	0
ILMN_1233537	Gucy1a3	3	81.9	rs13481388	12	35.35	N	N	24.79	14.31	17.82	17.27	2		rs13481388	12	35.45	0.43	0.25	0.3	1.39	0	0
ILMN_1235811	1110032E23Rik	3	79.8	rs13481388	12	35.35	N	N	24.23	22.4	22.56	19.53	2		rs13481388	12	35.45	0	0.06	0.01	0.24	0	0
ILMN_1245773	1700129L04Rik	15	94.9	rs13481388	12	35.35	N	N	0.42	28.7	0.1	5.49	3		rs13481388	12	35.45	0.09	5.28	0.01	0.15	0	0
ILMN_1254699	Ctso	3	81.8	rs13481388	12	35.35	N	N	15.09	16.69	23.47	27.99	5		rs13481388	12	35.45	0.03	1.5	0.55	2.19	0	0
ILMN_2441625	1110032E23Rik	3	79.8	rs13481388	12	35.35	N	N	13.92	34.15	20.62	15.18	3		rs13481388	12	35.45	0	0.15	0.15	0.09	0	0
ILMN_1257771	Ifi205	1	176	D12Mit46	12	35.63	N	N	24.77	21.62	18.91	24.95	8		gnf12.033.545	12	35.81	0	0.31	1.42	0.25	0	0
ILMN_2775957	Apoa2	1	173	D12Mit46	12	35.63	N	N	17.96	13.16	12.11	25.18	5		gnf12.033.545	12	35.81	0.02	0.41	0.44	0.65	0	0
ILMN_1214408	Rps2	17	24.9	rs6390300	12	36.55	N	N	36.22	34.34	33.44	30.7	1		rs13481393	12	36.63	1.84	0.79	0.97	0.03	0	0
ILMN_1226684	Dock4	12	41.2	rs6390300	12	36.55	Y	Y	43.62	34.43	25.27	45.24	1		rs13481393	12	36.63	19.42	18.34	4.65	10.4	0	0
ILMN_1229656	Nrcam	12	45.7	rs6390300	12	36.55	Y	N	70.99	66.57	62.47	70.3	1		rs13481393	12	36.63	22.3	36.46	17.52	24.51	3	0
ILMN_1233489	LOC226574	12	165	rs6390300	12	36.55	Y	N	28.96	41.54	23.94	34.64	13		rs13481393	12	36.63	4.9	4.83	8.66	4.63	0	0
ILMN_1234314	LOC382790	13	91.4	rs6390300	12	36.55	N	N	24.13	24.69	20.76	20.7	6		rs13481393	12	36.63	4.84	6.93	12.43	2.64	0	0
ILMN_1234694	Zfp277	12	41	rs6390300	12	36.55	Y	Y	32.42	31.47	35.69	32.84	1		rs13481393	12	36.63	15.97	16.18	0.22	11.12	0	0
ILMN_1240336	Nrcam	12	45.7	rs6390300	12	36.55	Y	N	33.61	31.93	27.58	46.17	1		rs13481393	12	36.63	15.5	33.68	15.9	27.79	10	0
ILMN_1240350	LOC380692	12	0	rs6390300	12	36.55	Y	N	37.57	39.99	43.81	39.29	1		rs13481393	12	36.63	1.9	12.75	9.91	1.15	0	0
ILMN_1242333	Immp2l	12	42.8	rs6390300	12	36.55	Y	N	25.49	33.9	29.61	35.55	1		rs13481393	12	36.63	8.5	5.1	12.52	20.1	0	0
ILMN_1246877	Dock4	12	41.4	rs6390300	12	36.55	Y	Y	17	24.87	35.93	27.31	15		rs13481393	12	36.63	3.9	3.43	1.24	3.67	0	0
ILMN_1252156	Dock4	12	41.2	rs6390300	12	36.55	Y	Y	60.84	58.57	58.84	61.07	1		rs13481393	12	36.63	19.23	29.38	10.48	13.77	3	0
ILMN_1253395	ENSMUST00000075405.3	12	67.6	rs6390300	12	36.55	Y	N	44.35	52.94	44.14	46.78	1		rs13481393	12	36.63	8.92	12.7	12	14.6	0	0
ILMN_1259869	LOC380682	10	128	rs6390300	12	36.55	N	N	23.13	23.06	14.14	25.68	5		rs13481393	12	36.63	1.3	7.11	4.21	1.59	0	0
ILMN_2534332	LOC194913	12	18.4	rs6390300	12	36.55	Y	N	42.72	53.8	47.41	46.32	1		rs13481393	12	36.63	17.53	15.57	11.71	24.11	0	0
ILMN_2717549	ILM1340647	17	0	rs6390300	12	36.55	N	N	48.86	45.14	34.76	40.29	1		rs13481393	12	36.63	1.53	1.64	3.67	3.19	0	0
ILMN_1234314	LOC382790	13	91.4	CEL-12_40825549	12	46.53	N	N	23.22	24.76	20.03	19.79	3		CEL-12_40825549	12	46.76	8.32	3.87	4.43	0.38	0	0
ILMN_2492961	6530401N04Rik	12	53.1	rs13481431	12	47.68	Y	N	47.89	62.47	43.46	46.29	1		rs13481431	12	47.9	0.25	0.25	0.19	2.48	0	0
ILMN_1243477	Mipol1	12	58.4	rs13481471	12	57.82	Y	Y	74.69	67.33	44.58	60.65	1		rs3719306	12	58.77	19.34	44.3	26.03	31.11	15	0
ILMN_2728465	Sstr1	12	59.3	rs6312679	12	59.42	Y	Y	52.61	50.97	28.6	28.79	1		rs13481478	12	59.7	14.49	32.14	44.49	22.69	9	0
ILMN_1237736	Plekhf2	4	10.9	rs13481480	12	60.06	N	N	27.71	25.41	8.12	8.55	6		rs13481480	12	60.24	0.03	0.92	0.09	1.08	0	0
ILMN_1213456	Dhrs7	12	73.8	rs3716547	12	68.49	Y	N	17.14	24.47	18.81	26.92	10		rs3716547	12	68.67	2.45	0.53	0.62	0.68	0	0
ILMN_1214469	LOC380764	12	74.5	rs3716547	12	68.49	Y	N	81.53	90.62	103.97	62.32	1		rs3716547	12	68.67	0	0.69	0.01	0.5	0	0
ILMN_1222969	ENSMUSG00000052673	12	70.5	rs3716547	12	68.49	Y	Y	74.56	77.23	84.09	54.22	1		rs3716547	12	68.67	0.39	0.25	3.43	0.22	0	0
ILMN_2547737	Daam1	12	73.1	rs3716547	12	68.49	Y	Y	65.11	73.56	78.08	45	1		rs3716547	12	68.67	0	0.89	0.05	0.02	0	0
ILMN_2573159	ENSMUSG00000052673	12	70.4	rs3716547	12	68.49	Y	Y	38.09	31.89	43.1	33.38	1		rs3716547	12	68.67	0.29	0.63	0.59	0.46	0	0
ILMN_2637413	Dbpht2	12	75.4	rs3687032	12	74.42	Y	Y	62.81	80.89	74.02	59.59	1		rs6346026	12	76.1	0.42	0.82	0	0.6	0	0
ILMN_2745849	Snapc1	12	75.1	rs3687032	12	74.42	Y	Y	22.06	26.04	20.54	26.86	10		rs6346026	12	76.1	2.12	1.1	0.06	0.59	0	0
ILMN_1218706	LOC382361	10	35.6	rs13481541	12	77.3	N	N	27.53	0.01	0.12	0.03	2		rs13481541	12	77.48	1.87	6.2	0.44	2.44	0	0
ILMN_1235434	Isoc1	18	58.8	rs13481630	12	105.92	N	N	0.56	0.43	0.04	25.04	5		rs13481630	12	106.75	2.15	0.9	0.62	0.02	0	0
ILMN_1217337	4930427A07Rik	12	114	rs13481658	12	113.6	Y	Y	52.65	51.89	51.01	60.43	1		rs4229611	12	114.5	8.66	6.32	6.52	11.32	0	0
ILMN_1221215	D430020J02Rik	12	118	rs3654706	12	117.52	Y	Y	47.49	64.82	45.22	47.78	1		rs3694890	12	118.63	12.4	13.32	7.86	11.55	0	0
ILMN_2444158	Itgb8	12	120	rs4135448	12	119.5	Y	Y	41.42	28.89	45.13	57.83	1		rs4135448	12	120.29	11.89	13.33	9.45	15.06	0	0
ILMN_1227447	9830123M21Rik	1	138	rs6215262	13	3.78	N	N	5.33	4.63	25.11	3.36	4		rs13459139	13	12.16	0.07	3.48	0	3.23	0	0
ILMN_1232041	Klf6	13	5.86	rs6377183	13	6.91	Y	Y	25.63	15.33	13.39	34.83	8		rs13459139	13	12.16	1.2	0.13	2.56	1.6	0	0
ILMN_2731949	Klf6	13	5.87	rs6377183	13	6.91	Y	Y	35.6	18.52	31.52	33.26	14		rs13459139	13	12.16	1.53	8.02	1.25	1.53	0	0
ILMN_2472861	Zmynd11	13	9.69	rs13481683	13	9.39	Y	Y	27.52	26.88	29.11	30.48	1		rs13459139	13	12.16	0.14	2.18	4.21	4.81	0	0
ILMN_2552717	Kctd3	1	191	rs13481683	13	9.39	N	N	58.74	22.02	20.25	37.84	8		rs13459139	13	12.16	0.49	3.07	0.5	1.72	0	0
ILMN_2658407	Elmo1	13	20.7	rs13481683	13	9.39	Y	N	4.49	25.81	3.79	2.65	3		rs13459139	13	12.16	3.61	5.24	0.53	4.85	0	0
ILMN_2776314	D830013H23Rik	11	101	rs13481683	13	9.39	N	N	26	35.41	2.52	9.85	6		rs13459139	13	12.16	0.13	0.34	0	2.45	0	0
ILMN_1214036	Heatr1	13	12.5	rs6198959	13	11.16	Y	Y	33.52	28.7	47.78	35.75	1		rs13459139	13	12.16	0.5	0.7	0.19	5.2	0	0
ILMN_1220546	Ero1lb	13	12.7	rs6198959	13	11.16	Y	Y	38.62	52.19	48.27	43.8	1		rs13459139	13	12.16	0.05	0.01	5.08	10.63	0	0
ILMN_1220974	B3galnt2	13	14.1	rs6198959	13	11.16	Y	Y	30.42	30.9	30.3	37.26	1		rs13459139	13	12.16	0.54	1.17	2.98	1.95	0	0
ILMN_1238533	B3galnt2	13	14.1	rs6198959	13	11.16	Y	Y	43.03	51.96	41.81	57.4	1		rs13459139	13	12.16	7.77	2.61	0.62	0.08	0	0
ILMN_1239776	D230040A04Rik	13	14.2	rs6198959	13	11.16	Y	Y	45.19	57.62	43.18	47.5	1		rs13459139	13	12.16	20.25	3.92	0.47	8.43	0	0
ILMN_1244015	Ryr2	13	11.7	rs6198959	13	11.16	Y	Y	40.94	45.53	31.14	47.97	1		rs13459139	13	12.16	2.01	9.16	1.07	0.19	0	0
ILMN_1258081	Actn2	13	12.4	rs6198959	13	11.16	Y	Y	25.6	20.38	17.16	23.37	2		rs13459139	13	12.16	0.01	0	0.93	0.01	0	0
ILMN_1259739	Mtr	13	12.3	rs6198959	13	11.16	Y	Y	78.97	79.08	69.18	72.01	1		rs13459139	13	12.16	0.09	0.48	0.03	0.09	0	0
ILMN_2426079	Gpr137b	13	13.5	rs6198959	13	11.16	Y	Y	43.23	34.82	37.7	39.64	1		rs13459139	13	12.16	4.03	1.36	0.18	0.69	0	0
ILMN_2455850	Gpr137b	13	12.7	rs6198959	13	11.16	Y	Y	106.06	109.6	110.44	156.18	1		rs13459139	13	12.16	0.02	0.43	0.34	2.18	0	0
ILMN_2665117	Hecw1	13	14.3	rs6198959	13	11.16	Y	Y	58.89	64.15	43.82	67.19	1		rs13459139	13	12.16	7.78	5.3	0.43	0.85	0	0
ILMN_2692960	Ero1lb	13	12.7	rs6198959	13	11.16	Y	Y	93.56	100.12	100.96	102.71	1		rs13459139	13	12.16	0.3	0.1	6.05	0	0	0
ILMN_2764727	Actn2	13	12.4	rs6198959	13	11.16	Y	Y	28.29	37.14	57.5	42.78	1		rs13459139	13	12.16	0.63	1.62	0.49	3.08	0	0
ILMN_2776314	D830013H23Rik	11	101	rs6198959	13	11.16	N	N	26.34	31.51	1.22	14.84	6		rs13459139	13	12.16	0.13	0.34	0	2.45	0	0
ILMN_1228112	Stard3nl	13	19.5	rs6180409	13	15.9	Y	Y	44.13	50.51	48.69	35.42	1		rs3701757	13	16.28	0.4	0.05	0.06	0.25	0	0
ILMN_1245824	Cdc2l5	13	17.8	rs6180409	13	15.9	Y	Y	41.84	60.2	64.3	40.91	1		rs3701757	13	16.28	0.07	0.26	0.02	2.87	0	0
ILMN_1253355	2810021B07Rik	13	17.8	rs6180409	13	15.9	Y	Y	37.92	55.45	55.4	38.9	1		rs3701757	13	16.28	9.74	13.53	7.92	2.86	0	0
ILMN_2507540	Edaradd	13	12.6	rs6180409	13	15.9	Y	Y	8.02	6.92	32.23	21.17	4		rs3701757	13	16.28	0.4	0.32	1.52	0.59	0	0
ILMN_2552717	Kctd3	1	191	rs6180409	13	15.9	N	N	55.23	32.76	47.46	45.96	1		rs3701757	13	16.28	0.24	2.4	0.96	2.8	0	0
ILMN_2597481	Rala	13	18	rs6180409	13	15.9	Y	Y	58.17	68.64	58.66	56.58	1		rs3701757	13	16.28	0.02	0.1	0.14	2.31	0	0
ILMN_2598775	Stard3nl	13	19.5	rs6180409	13	15.9	Y	Y	31.73	29.89	36.95	26.66	1		rs3701757	13	16.28	26.26	17.01	11.63	9.43	2	0
ILMN_2749935	5033411D12Rik	13	17.3	rs6180409	13	15.9	Y	Y	29.57	29.61	35.65	29.44	1		rs3701757	13	16.28	69.9	60.61	46.43	66.07	1	1
ILMN_2693976	Ncl	1	88.3	D13Mit303	13	17.3	N	N	18.23	25.74	21.1	13.99	3		rs3699519	13	17.5	0.3	0.85	1.3	0.18	0	0
ILMN_1218533	Dock10	1	80.6	rs13481727	13	22.17	N	N	10.54	13.23	24.09	14.28	4		rs13481727	13	22.26	0.2	0.4	0.88	0.13	0	0
ILMN_1222313	Hist1h4f	13	23.6	rs13481727	13	22.17	Y	Y	26.87	45.96	38.14	21.69	12		rs13481727	13	22.26	31.1	15.85	18.86	34.78	8	0
ILMN_1230265	Hist1h4a	13	23.9	rs13481727	13	22.17	Y	Y	38.39	20.86	44.5	25.47	14		rs13481727	13	22.26	25.64	28.02	10.38	28.33	10	0
ILMN_2525565	Hist1h4f	13	23.6	rs13481727	13	22.17	Y	Y	42.38	24.93	33.29	35.41	1		rs13481727	13	22.26	36.79	17.15	21.6	8.67	2	0
ILMN_2669460	Rpp40	13	36	rs4229685	13	35.88	Y	Y	42.59	28.48	44.83	30.91	1		rs4229685	13	35.97	8.16	15.63	21.5	6.44	0	0
ILMN_1254409	Atxn1	13	45.7	rs4229721	13	45.56	Y	Y	81.3	81.66	52.73	70.06	1		rs4229721	13	45.64	30.73	64.57	43.26	41.3	1	1
ILMN_1250257	LOC380844	13	49	rs13481798	13	46.76	Y	Y	64.9	52.57	38.97	42.9	1		rs13481798	13	46.85	0	0.02	2.96	0	0	0
ILMN_2595091	Nhlrc1	13	47.1	rs13481798	13	46.76	Y	Y	35.41	45.02	39.03	49.65	1		rs13481798	13	46.85	16.82	20.2	5.59	3.48	0	0
ILMN_2735554	2010001K21Rik	13	47.1	D13Mit91	13	46.83	Y	Y	14.18	36.41	25.73	34.67	15		rs13481798	13	46.85	5.67	1.22	1.52	1.92	0	0
ILMN_1221198	Ptdss1	13	67.1	rs6209128	13	52.78	Y	N	8.28	13.66	25.47	11.15	4		rs6209128	13	52.87	0.18	0.32	0.29	1.54	0	0
ILMN_1260582	LOC280487	14	0	rs6209128	13	52.78	N	N	36.23	24.92	20.13	27.7	13		rs6209128	13	52.87	0.01	4.53	0.68	0.36	0	0
ILMN_1225712	GI_24475922-S	13	1	mCV23262360	13	53.56	Y	N	53.39	54.38	42.63	32.42	1		rs3023086	13	53.53	2.26	8.04	0.01	0.78	0	0
ILMN_2543417	Auh	13	53	mCV23262360	13	53.56	Y	Y	24.27	24	11.34	29.53	13		rs3023086	13	53.53	1.5	0.14	0.64	4.44	0	0
ILMN_2550962	ILM106660195	13	0	mCV23262360	13	53.56	Y	N	31.27	36.71	30.28	35.31	1		rs3023086	13	53.53	1.09	0.6	1.43	0.07	0	0
ILMN_1225503	4833439L19Rik	13	54.7	rs3673174	13	54.04	Y	Y	29.59	11.16	8.07	19.68	2		rs3023086	13	53.53	3.02	0.95	0.02	0.77	0	0
ILMN_1233606	Sfxn1	13	54.2	rs3673174	13	54.04	Y	Y	32.83	42.07	31.91	23.44	12		rs3023086	13	53.53	2.36	0.41	2.1	0.86	0	0
ILMN_2624647	Rab24	13	55.4	rs3673174	13	54.04	Y	Y	19.88	20.62	30.31	16.26	4		rs3023086	13	53.53	0.05	1.52	1.04	0.13	0	0
ILMN_2642012	Cltb	13	54.7	rs3673174	13	54.04	Y	Y	6.8	26.54	12.54	14.27	3		rs3023086	13	53.53	1.22	0.64	1.08	0.41	0	0
ILMN_2675569	Sfxn1	13	54.2	rs3673174	13	54.04	Y	Y	16.41	33.35	18.34	21.97	3		rs3023086	13	53.53	1.18	0.48	0.71	0.17	0	0
ILMN_2757197	Thoc3	13	54.6	rs3673174	13	54.04	Y	Y	42.83	24.53	31.95	36.33	1		rs3023086	13	53.53	1.62	2.23	0.39	0.09	0	0
ILMN_2757958	scl00280487.1_157-S	13	0	rs3673174	13	54.04	Y	N	16.1	40.9	16.1	24.43	10		rs3023086	13	53.53	1.8	0	0.3	0.32	0	0
ILMN_1226017	2610035D17Rik	11	113	rs13481827	13	57.79	N	N	37.58	17.92	32.29	11.29	7		rs13481827	13	57.88	3.07	0.46	1.29	10.32	0	0
ILMN_1237764	1700007B14Rik	8	78.3	rs13481827	13	57.79	N	N	30.39	35.3	25.38	22.98	12		rs13481827	13	57.88	0.45	0.2	0.35	0.16	0	0
ILMN_1246770	ILM103850315	4	1	rs13481827	13	57.79	N	N	14.27	16.91	9.39	29.34	5		rs13481827	13	57.88	0.22	4.54	0.23	0.01	0	0
ILMN_1227383	LOC233184	13	68.1	rs13481850	13	63.88	Y	Y	43.19	42.23	33.71	32.1	1		rs6400030	13	64.06	18.86	18.85	22.37	19.56	0	0
ILMN_1237764	1700007B14Rik	8	78.3	rs13481850	13	63.88	N	N	27.93	32.93	34.36	30.17	1		rs6400030	13	64.06	0.89	0.03	0.04	0.01	0	0
ILMN_1247465	9630025I21Rik	13	67.6	rs13481850	13	63.88	Y	Y	35.44	42.07	47.49	46.19	1		rs6400030	13	64.06	30.35	30.28	20.99	12.8	6	0
ILMN_1254717	2810487A22Rik	13	67.5	rs13481850	13	63.88	Y	Y	31.34	27.24	29.94	36.41	1		rs6400030	13	64.06	1.2	1.38	0.23	4.29	0	0
ILMN_1256222	Zfp759	13	67.2	rs13481850	13	63.88	Y	Y	17.12	32.64	29.88	14.41	9		rs6400030	13	64.06	2.6	4.84	1.04	6.28	0	0
ILMN_1260582	LOC280487	14	0	rs13481850	13	63.88	N	N	27.93	21.56	12.21	27.84	8		rs6400030	13	64.06	3.78	1.92	0.28	1.43	0	0
ILMN_2535603	LOC383616	13	0	rs13481850	13	63.88	Y	N	55.48	93.35	74.85	59.45	1		rs6400030	13	64.06	20.29	30.38	38.55	20.18	9	0
ILMN_2729422	Ror2	13	53.2	rs13481850	13	63.88	Y	N	12.3	5.22	15.34	29.33	5		rs6400030	13	64.06	0.04	1.41	0.01	0.78	0	0
ILMN_2696110	Tppp	13	74.2	rs6179438	13	72.08	Y	Y	9.07	28.94	11.99	5.56	3		rs13481870	13	71.14	1.34	0.08	12.18	0.21	0	0
ILMN_2439645	Exoc3	13	74.4	rs3688781	13	73.32	Y	Y	31.02	39.78	31.97	24.59	1		rs13481874	13	73.11	0.32	0.96	2.11	0.12	0	0
ILMN_1216614	Brd9	13	74.1	rs13481889	13	77.23	Y	Y	55.23	42.87	52.49	89.1	1		rs3664096	13	75.9	2.41	1.35	1.08	0.75	0	0
ILMN_1236556	Zfp72	13	74.5	rs13481889	13	77.23	Y	Y	40.23	25.07	47.11	53.92	1		rs3664096	13	75.9	1.14	2.12	2.73	0.72	0	0
ILMN_1245689	LOC238730	13	77.5	rs13481889	13	77.23	Y	Y	38.79	4.91	17.87	17.69	2		rs3664096	13	75.9	0.46	2.31	0	3.6	0	0
ILMN_2439102	Ccdc127	13	74.5	rs13481889	13	77.23	Y	Y	70.28	45.35	50.94	68.02	1		rs3664096	13	75.9	0.48	0.71	1.83	1.76	0	0
ILMN_2587929	2210408I21Rik	13	77.7	rs13481889	13	77.23	Y	Y	16.74	4.3	26.3	16.31	4		rs3664096	13	75.9	1.49	2.25	0.35	2.57	0	0
ILMN_1255079	Dmxl1	18	50	rs13481902	13	80.52	N	N	25.02	2.23	0.51	0.52	2		rs3702220	13	80.88	1.41	0.22	0	2.19	0	0
ILMN_1220270	Mef2c	13	83.8	rs3693887	13	81.07	Y	Y	132.8	114.99	79.65	113.8	1		rs3702220	13	80.88	0.37	0.11	3.75	0.48	0	0
ILMN_2743244	Cd86	16	36.6	D13Mit233	13	84.07	N	N	33.52	39.48	14.64	17.98	6		rs3669221	13	83.88	3.61	1.3	0.05	0.15	0	0
ILMN_2494061	Xrcc4	13	90	CEL-13_85525049	13	89.34	Y	Y	31.91	45.38	26.69	29.45	1		CEL-13_85696036	13	89.18	0.13	1.3	0.2	0.42	0	0
ILMN_1222865	Atg10	13	91.2	rs6372324	13	91.13	Y	Y	15.67	27.17	15.12	32.2	10		rs6322774	13	90.56	1.19	0.72	0.06	6.38	0	0
ILMN_1229911	Rgnef	13	98.7	rs6372324	13	91.13	Y	N	13.43	26.62	8.38	10.84	3		rs6322774	13	90.56	0.24	1.16	0.06	0.87	0	0
ILMN_2665198	Tmem167	13	90.3	rs6372324	13	91.13	Y	Y	48.94	56.73	52.77	44.96	1		rs6322774	13	90.56	0.83	0.14	0.98	0.16	0	0
ILMN_2667100	Atg10	13	91.1	rs6372324	13	91.13	Y	Y	22.52	29.21	10.91	29.39	10		rs6322774	13	90.56	0.32	0.01	0.55	0.78	0	0
ILMN_2503329	Zcchc9	13	91.9	rs6328703	13	92.18	Y	Y	81.15	91.3	68.6	86.81	1		rs6328703	13	91.84	1.61	0.04	0.15	1.49	0	0
ILMN_2695134	EG328314	13	98.4	rs3696278	13	97.49	Y	Y	29.91	33.59	24.67	36.48	1		rs3696278	13	97.16	1.6	0.88	0.23	0.61	0	0
ILMN_1212842	D930006D18Rik	19	38	rs3705092	13	104.38	N	N	0.88	25.66	1.9	0.93	3		rs3688959	13	103.9	0.14	0.74	0.06	2.31	0	0
ILMN_2659337	Cenpk	13	105	rs3705092	13	104.38	Y	Y	18.29	26.06	38.97	19.86	9		rs3688959	13	103.9	0.9	3.86	0.63	6.6	0	0
ILMN_1220608	Ipo11	13	108	rs13481995	13	107.47	Y	Y	6.07	16.39	25.81	16.76	4		rs13481995	13	107.14	6.7	3.26	3.27	3.59	0	0
ILMN_1213034	4833420G17Rik	13	120	rs6412462	13	120.09	Y	Y	46.98	37.68	35.41	48.99	1		rs13482038	13	120.06	0.69	0.54	0.05	3.59	0	0
ILMN_1223318	4833420G17Rik	13	120	rs6412462	13	120.09	Y	Y	41.96	61.47	52.1	56.88	1		rs13482038	13	120.06	24.15	22.26	9.21	9.82	0	0
ILMN_1238102	Ide	19	37.4	rs6412462	13	120.09	N	N	31.19	36.37	38.74	30.68	1		rs13482038	13	120.06	0.25	4.38	2.73	1.01	0	0
ILMN_1242705	4833420G17Rik	13	120	rs6412462	13	120.09	Y	Y	42.81	54.71	50.01	47.32	1		rs13482038	13	120.06	1.44	0.09	0.67	5.49	0	0
ILMN_1250018	4833420G17Rik	13	120	rs6412462	13	120.09	Y	Y	69.29	69.31	82.97	53.45	1		rs13482038	13	120.06	22.28	36.43	20.24	29.1	10	0
ILMN_1257952	Zfp131	13	0.05	rs6412462	13	120.09	Y	N	23.19	40.51	34.8	31.95	15		rs13482038	13	120.06	19.39	13.43	4.07	5.13	0	0
ILMN_2438212	Zfp131	13	0.06	rs6412462	13	120.09	Y	N	35.08	41.22	33.28	34.27	1		rs13482038	13	120.06	19.92	10.83	16.49	1.25	0	0
ILMN_2585137	Ptbp1	13	0.12	rs6412462	13	120.09	Y	N	68.36	54.22	53.51	58.89	1		rs13482038	13	120.06	32.12	23.55	20.84	20.38	2	0
ILMN_2623315	E130304F04Rik	13	1	rs6412462	13	120.09	Y	N	46.83	30.2	59.05	42.89	1		rs13482038	13	120.06	27.71	10.04	12.39	8.39	2	0
ILMN_2696066	3110070M22Rik	13	120	rs6412462	13	120.09	Y	Y	82.4	85.69	103.66	101.47	1		rs13482038	13	120.06	19.62	31.81	19.97	27.01	10	0
ILMN_2752569	Paip1	13	120	rs6412462	13	120.09	Y	Y	59.61	55.52	61.88	63.82	1		rs13482038	13	120.06	18.78	40.98	19.33	36.84	10	0
ILMN_1218584	Rpp14	14	8.92	rs3710916	14	6.81	Y	Y	66.4	80.29	103.07	52.49	1		rs3710916	14	8.85	42.17	55.86	15.8	31.43	13	0
ILMN_1230951	Pdhb	14	0	rs3710916	14	6.81	Y	N	26.56	26.11	24.87	37.21	1		rs3710916	14	8.85	21.95	8.93	11.17	6.24	0	0
ILMN_2707808	Pdhb	14	9	rs3710916	14	6.81	Y	Y	63.48	78.93	81.37	51.6	1		rs3710916	14	8.85	59.36	63.99	22.58	40.61	13	0
ILMN_2752300	4930452B06Rik	14	9.26	rs3710916	14	6.81	Y	Y	14.6	30.54	27.62	19.68	9		rs3710916	14	8.85	10.31	9.14	2.47	2.28	0	0
ILMN_1229141	4930452B06Rik	14	9.34	rs6314527	14	8.2	Y	Y	24.44	27.09	22.85	29.57	13		rs6314527	14	10.24	24.78	23.24	13.58	21.59	0	0
ILMN_1247561	Pdhb	14	9	rs6314527	14	8.2	Y	Y	24.99	41.56	25.77	26.65	1		rs6314527	14	10.24	13.45	7.16	1.6	14.29	0	0
ILMN_1220253	Rpl15	14	18.3	rs13482054	14	9.27	Y	N	35.08	47.64	49.68	46.57	1		rs13482054	14	11.31	25.49	28.21	23.5	16.38	3	0
ILMN_1243314	Rpl15	14	19.1	rs13482054	14	9.27	Y	N	71.18	72.92	88.03	50.13	1		rs13482054	14	11.31	43.23	59.83	19.21	29.73	13	0
ILMN_2491824	A430107N12Rik	14	14.9	rs13482054	14	9.27	Y	N	17.2	22.94	15.2	24.23	5		rs13482054	14	11.31	3.79	1.57	0.02	5.87	0	0
ILMN_2617194	Rarb	14	17.3	rs13482054	14	9.27	Y	N	23.94	28.69	13.07	13.51	3		rs13482054	14	11.31	0.75	0.05	0.65	1.16	0	0
ILMN_2656189	Nkiras1	14	19.1	rs13482054	14	9.27	Y	N	60.54	76.95	64.56	63.28	1		rs13482054	14	11.31	70.79	67.21	18.91	38.8	13	0
ILMN_2744641	Thoc7	14	14.8	rs13482054	14	9.27	Y	N	31.94	21.65	18.39	25.13	8		rs13482054	14	11.31	3.95	5.57	2.42	2.43	0	0
ILMN_2748680	Fhit	14	10.4	rs13482054	14	9.27	Y	Y	21.8	26.47	23.48	16.24	3		rs13482054	14	11.31	19.44	16.72	3.8	4.54	0	0
ILMN_1252615	Camk2g	14	21.6	rs6352512	14	9.99	Y	N	28.57	18.13	12.59	12.36	2		rs13482054	14	11.31	6.49	16.8	2.46	5.84	0	0
ILMN_1244036	Zmynd17	14	21.3	rs3690631	14	20.54	Y	Y	13.57	11.5	24.7	16.89	4		rs3690631	14	22.57	23.63	24.3	11.42	11.46	0	0
ILMN_2494244	Vdac2	14	22.7	rs3690631	14	20.54	Y	Y	12.97	27.47	22.2	10.48	3		rs3690631	14	22.57	10.34	13.53	4.37	5.08	0	0
ILMN_2591800	Comtd1	14	22.7	rs3690631	14	20.54	Y	Y	17.43	20.46	28.99	18.54	4		rs3690631	14	22.57	9.77	11.12	8.75	11.37	0	0
ILMN_1224736	Zmiz1	14	26.5	rs13482099	14	23.61	Y	Y	31	31.34	36.03	58.19	1		rs3658866	14	23.78	0.03	1.11	0.13	1.76	0	0
ILMN_2675922	2310047A01Rik	14	26.5	rs3697334	14	26.2	Y	Y	14.47	12.63	24.8	14.55	4		rs13482122	14	31.83	0.02	0.68	2.81	1.5	0	0
ILMN_1226755	Nisch	14	32	rs13482119	14	29.15	Y	Y	45.43	50.81	55.95	27.41	1		rs13482122	14	31.83	22.76	24.94	15.36	34.16	5	0
ILMN_1237553	LOC328369	14	31.4	rs13482119	14	29.15	Y	Y	2.7	10.23	0.78	24.43	5		rs13482122	14	31.83	2.68	3.3	0.24	1.81	0	0
ILMN_2640348	Tmem110	14	31.7	rs13482119	14	29.15	Y	Y	14.41	26.04	23.37	21.13	3		rs13482122	14	31.83	0.19	0.27	0.66	3.22	0	0
ILMN_1212934	6330416L11Rik	14	45.8	rs13482156	14	40.91	Y	Y	28.26	29.92	37.37	27.74	1		rs13482156	14	42.82	6.27	25.29	10.3	9.07	0	0
ILMN_1220763	Rnase1	14	51.8	D14Mit101	14	48.45	Y	Y	55.16	48.69	70.72	57.29	1		rs6278789	14	50.41	1.15	2.49	5.28	0.49	0	0
ILMN_1236306	Gm288	14	51.4	D14Mit101	14	48.45	Y	Y	25.78	20.75	24.19	18.34	7		rs6278789	14	50.41	5.84	7.37	4.82	3.92	0	0
ILMN_2699800	Cdh24	14	55.3	D14Mit101	14	48.45	Y	N	13.02	14.39	29.29	10.54	4		rs6278789	14	50.41	8.78	11.99	11.37	10.71	0	0
ILMN_2753589	3632451O06Rik	14	50.3	D14Mit101	14	48.45	Y	Y	31.41	36.07	17.33	42.59	13		rs6278789	14	50.41	13.52	14.86	3.23	3.31	0	0
ILMN_1217470	Slc35f4	14	49.9	rs13482191	14	53.6	Y	Y	34.83	20.62	14.24	18.95	2		rs8244157	14	55.24	27.08	32.22	34.7	20.82	12	0
ILMN_1221265	Rcbtb1	14	58.7	rs13482191	14	53.6	Y	N	17.48	13.47	24.12	17.91	4		rs8244157	14	55.24	2.2	2.58	2.15	3.2	0	0
ILMN_1222492	Mipep	14	61.5	rs13482191	14	53.6	Y	N	59.22	81.98	78.07	46.8	1		rs8244157	14	55.24	0.06	0.55	5.82	0.19	0	0
ILMN_1246903	Ap1g2	14	55.7	rs13482191	14	53.6	Y	Y	26.24	40.16	18.81	26.79	13		rs8244157	14	55.24	0.02	0.99	0.09	0.76	0	0
ILMN_1250356	Gjb6	14	57.7	rs13482191	14	53.6	Y	Y	11.31	17.34	9.99	30.55	5		rs8244157	14	55.24	5.33	0.61	1.59	0.35	0	0
ILMN_1250417	Adcy4	14	56.4	rs13482191	14	53.6	Y	Y	53.52	38.76	39.47	23.98	12		rs8244157	14	55.24	15.49	21.57	11.91	8.51	0	0
ILMN_1254220	2600011E07Rik	14	61	rs13482191	14	53.6	Y	N	11.29	29.69	26.41	19.29	9		rs8244157	14	55.24	0.01	1.94	0.94	0.38	0	0
ILMN_1259924	Pspc1	14	57.4	rs13482191	14	53.6	Y	Y	31.14	46.27	54.7	52.57	1		rs8244157	14	55.24	12	27.02	39.13	27.19	15	0
ILMN_2426398	C78339	14	58.6	rs13482191	14	53.6	Y	Y	38.29	62.63	49.08	34.18	1		rs8244157	14	55.24	11.99	11.98	4.05	5.79	0	0
ILMN_2597332	1700123O20Rik	14	55.3	rs13482191	14	53.6	Y	Y	62.46	75.18	94.53	50.85	1		rs8244157	14	55.24	34.29	76.62	46.87	86.43	1	1
ILMN_2598877	Slc7a8	14	55.3	rs13482191	14	53.6	Y	Y	23.45	56.51	43.21	24.02	15		rs8244157	14	55.24	0.01	0.21	2.39	0.3	0	0
ILMN_2635738	Atp8a2	14	60.7	rs13482191	14	53.6	Y	N	15.76	29.09	24.16	3.41	9		rs8244157	14	55.24	10.87	8.8	0.01	5.92	0	0
ILMN_2639588	Cdadc1	14	60.2	rs13482191	14	53.6	Y	N	19.08	29.97	36.62	32.26	15		rs8244157	14	55.24	0.81	0.92	0	0.24	0	0
ILMN_2737310	Mipep	14	61.5	rs13482191	14	53.6	Y	N	62.83	72.02	25.18	23.91	12		rs8244157	14	55.24	1.29	0.52	2.43	0.93	0	0
ILMN_2547078	Zc3h13	14	75.7	UT_14_66.802733	14	73.96	Y	Y	16.59	27.07	27.6	14.93	9		rs13482256	14	75.62	0.9	0.34	2.4	0.07	0	0
ILMN_2710665	Kctd4	14	76.4	UT_14_66.802733	14	73.96	Y	Y	32.18	33.74	22.57	33.36	13		rs13482256	14	75.62	0.11	0.03	0.13	3.14	0	0
ILMN_1226962	1300010F03Rik	14	79.5	rs13482262	14	76.69	Y	Y	35.7	24.92	16.98	27.48	13		rs13482262	14	78.36	7.59	3.25	15.59	1.01	0	0
ILMN_1241885	Enox1	14	77.6	rs13482262	14	76.69	Y	Y	68.4	66.04	66.81	65.71	1		rs13482262	14	78.36	0.06	0.07	0.08	0.64	0	0
ILMN_1249480	1300010F03Rik	14	79.6	rs13482262	14	76.69	Y	Y	78.36	77.02	70.03	83.08	1		rs13482262	14	78.36	2.33	0.39	4.5	0	0	0
ILMN_2646511	1300010F03Rik	14	79.5	rs13482262	14	76.69	Y	Y	22.1	14.33	17.86	25.58	5		rs13482262	14	78.36	13.37	18.64	16.35	24.82	0	0
ILMN_2688415	1300010F03Rik	14	79.6	rs13482262	14	76.69	Y	Y	35.59	29.57	25.44	39.1	1		rs13482262	14	78.36	1.02	0.05	3.36	0.07	0	0
ILMN_1225282	1700080P15Rik	14	80.2	rs6352085	14	78.42	Y	Y	30.07	30.77	17.89	22.71	6		rs6352085	14	80.08	7.1	5.72	6.68	8.16	0	0
ILMN_2593774	1190002H23Rik	14	79.7	rs6352085	14	78.42	Y	Y	84.43	66.72	57.77	76.31	1		rs6352085	14	80.08	8.55	12.56	0.1	14.39	0	0
ILMN_1241341	LOC385780	16	19.7	rs13482270	14	79.81	N	N	18.15	9.3	9.18	29.7	5		rs13482270	14	81.47	1.01	2.8	0.53	1.88	0	0
ILMN_2650683	Tdrd3	14	88	rs13482270	14	79.81	Y	N	7.6	24.53	5.9	24.68	10		rs13482270	14	81.47	1.97	15.14	0.46	10.8	0	0
ILMN_1222962	Diap3	14	87.1	rs3665803	14	82.21	Y	Y	15.67	21.41	23.43	25.7	5		rs13482276	14	84.04	4.13	2.88	1.08	0.03	0	0
ILMN_2606436	Diap3	14	87.1	rs3665803	14	82.21	Y	Y	52.28	61.49	60.89	56.68	1		rs13482276	14	84.04	13.96	21.61	6.15	7.09	0	0
ILMN_1214088	D14Ertd581e	14	99.6	gnf14.093.344	14	96.56	Y	Y	52.72	48.66	40.44	36.87	1		gnf14.093.344	14	98.08	16.69	29.5	17.6	19.32	3	0
ILMN_1233613	Dis3	14	99.5	gnf14.093.344	14	96.56	Y	Y	21.55	33.08	26.16	19.45	9		gnf14.093.344	14	98.08	13.05	27.44	20.12	15.48	3	0
ILMN_2423747	Rbm26	14	106	rs13482361	14	106.83	Y	Y	48.21	33.82	39.91	42.58	1		rs13482363	14	108.65	24.22	16.99	27.03	19.34	4	0
ILMN_1227526	9330177P18Rik	14	122	rs13482392	14	117.46	Y	Y	26.8	26.86	33.28	24.16	1		rs13482392	14	118.98	5.86	0.22	2.22	0.23	0	0
ILMN_1230443	Tpm1	9	66.9	rs13482392	14	117.46	N	N	24.38	0	0.39	0.46	2		rs13482392	14	118.98	2.61	0.9	1.24	1.66	0	0
ILMN_2766349	Dock9	14	122	rs13482392	14	117.46	Y	Y	56.66	38.7	28.09	37.69	1		rs13482392	14	118.98	3.43	0.21	0	0.16	0	0
ILMN_1220293	Gpc6	14	118	rs3669586	14	120.4	Y	Y	25.69	47.63	38.82	41.18	1		rs6384035	14	121.53	8.06	6.48	11.09	10.8	0	0
ILMN_1237830	1110020G09Rik	15	9.04	rs3693019	15	8.04	Y	Y	17.82	29.74	15.24	16.29	3		rs13482420	15	8.25	1.09	2.17	1.09	1.94	0	0
ILMN_1246011	Wdr70	15	8.04	rs3693019	15	8.04	Y	Y	33.42	25.47	28.38	30.79	1		rs13482420	15	8.25	0.14	2.93	0.01	0.43	0	0
ILMN_2663114	Skp2	15	9.04	rs3693019	15	8.04	Y	Y	41.2	46.49	38.16	44.05	1		rs13482420	15	8.25	0.74	0.46	0.11	0.14	0	0
ILMN_1232969	Bxdc2	15	10.4	rs6190892	15	10.42	Y	Y	14.54	24.76	26.18	20.1	9		CEL-15_8331158	15	8.42	3.12	0.68	0.58	0.02	0	0
ILMN_1234196	6030458C11Rik	15	12.8	rs6190892	15	10.42	Y	Y	146.73	121.79	129.94	126.54	1		CEL-15_8331158	15	8.42	4.44	19.4	15.35	9.71	0	0
ILMN_1236167	C230024O12Rik	15	16.7	rs6190892	15	10.42	Y	N	22.64	24.81	17.61	17.04	3		CEL-15_8331158	15	8.42	0.01	0.76	0.07	0.06	0	0
ILMN_2671447	Rad1	15	10.4	rs6190892	15	10.42	Y	Y	22.81	42.23	30.31	24.19	15		CEL-15_8331158	15	8.42	0.37	0.08	4.65	0.02	0	0
ILMN_2682928	Rai14	15	10.5	rs6190892	15	10.42	Y	Y	24.15	25.76	23.13	24.53	13		CEL-15_8331158	15	8.42	0.02	0.1	0.2	2.13	0	0
ILMN_2736042	Cdh6	15	13	rs6190892	15	10.42	Y	Y	39.93	35.36	28.54	29.14	1		CEL-15_8331158	15	8.42	5.91	13.6	5.18	6.68	0	0
ILMN_2745139	Cdh10	15	18.9	rs6190892	15	10.42	Y	N	37.77	22.72	24.66	30.64	14		CEL-15_8331158	15	8.42	0.13	0.01	2.33	0.04	0	0
ILMN_1215180	3300002P13Rik	7	1	rs13482467	15	20.41	N	N	21.17	22.68	22.05	25.81	5		rs13482469	15	20.87	0.69	0.21	0.28	0.73	0	0
ILMN_1215466	Oscar	7	3.56	rs13482467	15	20.41	N	N	27.61	23.62	24.45	27.17	14		rs13482469	15	20.87	0.12	1.36	1.3	0.14	0	0
ILMN_1216235	Kptn	7	16.7	rs13482467	15	20.41	N	N	28.29	28.04	24.62	25.69	1		rs13482469	15	20.87	0.18	0.01	0.45	0.03	0	0
ILMN_1252001	6430701C03Rik	7	7.17	rs13482467	15	20.41	N	N	20.53	26.07	18.62	23.39	3		rs13482469	15	20.87	0.85	0.05	0.55	1.59	0	0
ILMN_2687195	Zfp324	7	13.6	rs13482467	15	20.41	N	N	23.5	22.74	20.63	27.46	5		rs13482469	15	20.87	1.76	0.74	1.09	0.05	0	0
ILMN_2726595	Zfp446	7	13.6	rs13482467	15	20.41	N	N	27.84	30.48	22.65	26.97	13		rs13482469	15	20.87	0.11	0	1.55	1.79	0	0
ILMN_2732642	Kptn	7	16.7	rs13482467	15	20.41	N	N	24.39	26.03	21.7	26.44	13		rs13482469	15	20.87	0.18	0.13	0.2	0.91	0	0
ILMN_1227601	Dnahc5	15	28.4	rs13482498	15	28.44	Y	Y	27.06	28.79	16.1	43.32	13		rs13482498	15	28.43	8.87	8.15	12.56	11.98	0	0
ILMN_2604226	Sema5a	15	32.6	rs13482498	15	28.44	Y	Y	77.37	68.15	55.95	78.48	1		rs13482498	15	28.43	22.87	27.68	20.44	20.98	3	0
ILMN_1223548	Npal2	15	34.5	rs6162875	15	33.4	Y	Y	29.2	34.7	36.89	36.3	1		rs8267966	15	33.43	2.82	0.08	0.01	0.96	0	0
ILMN_1225464	Npal2	15	34.5	rs6162875	15	33.4	Y	Y	35.25	35.32	21.86	38.98	13		rs8267966	15	33.43	0.26	0.55	0.33	1.35	0	0
ILMN_2723369	Npal2	15	34.5	rs6162875	15	33.4	Y	Y	26.55	41.06	23.82	59.23	13		rs8267966	15	33.43	0.55	0.02	0.47	0.01	0	0
ILMN_1238799	Azin1	15	38.4	rs3695416	15	38.43	Y	Y	29.12	34	41.29	24.65	1		rs3660608	15	38.82	0.11	0.12	0.99	4.54	0	0
ILMN_2419748	Slc25a32	15	38.9	rs3695416	15	38.43	Y	Y	22.07	25.38	10.83	13.36	3		rs3660608	15	38.82	0.14	0.41	0.05	1.46	0	0
ILMN_2664346	Gpr126	10	14.1	rs3695416	15	38.43	N	N	1.23	5.5	25.64	0.94	4		rs3660608	15	38.82	1.18	0.07	0.02	0.56	0	0
ILMN_1225073	Cthrc1	15	38.9	rs13482529	15	38.95	Y	Y	53.96	64.2	76.61	53.26	1		rs13482529	15	38.96	3.65	9.01	0.15	0.1	0	0
ILMN_1235842	Mfsd1	15	38.9	rs13482529	15	38.95	Y	Y	75	81.82	80.64	49.08	1		rs13482529	15	38.96	0.05	0.24	1.27	0.18	0	0
ILMN_2739998	Tmem74	15	43.7	rs13482529	15	38.95	Y	Y	67.27	79.35	90.15	57.09	1		rs13482529	15	38.96	23.78	24.85	19.38	24.16	0	0
ILMN_2775016	Fzd6	15	38.9	rs13482529	15	38.95	Y	Y	38.74	38.87	27.47	51.58	1		rs13482529	15	38.96	21.75	21.58	13.38	10.43	0	0
ILMN_1234234	Csmd3	15	47.4	rs3719612	15	44.18	Y	Y	27.39	9.95	10.97	8.65	2		rs3719612	15	44.18	0.39	2.59	0.33	0.09	0	0
ILMN_1239505	A930017M01Rik	15	44.7	rs3719612	15	44.18	Y	Y	36.55	57.44	33.64	33.05	1		rs3719612	15	44.18	14.27	13.03	10.88	13.74	0	0
ILMN_2600585	5730410E15Rik	15	44.6	rs3719612	15	44.18	Y	Y	52.23	64.16	64.61	54.9	1		rs3719612	15	44.18	28.08	44.88	35.65	31.19	1	1
ILMN_1237572	Aard	15	51.9	rs6187435	15	51.48	Y	Y	21.25	23.83	14.47	36	5		rs6165881	15	51.65	12.21	24.22	2.05	17.33	0	0
ILMN_2616792	Med30	15	52.6	rs13482580	15	52.85	Y	Y	16.21	14.95	24.49	13.62	4		CEL-15_52357711	15	52.15	3.77	7.35	5.53	18.33	0	0
ILMN_1230369	Mast2	4	116	rs6258470	15	56.97	N	N	39.04	27.12	22.6	26	13		rs3702158	15	56.99	0.2	0.05	0.08	1.75	0	0
ILMN_1237084	Pvt1	15	62.1	rs3656705	15	62.47	Y	Y	33.95	44.66	34.7	29.69	1		rs6350909	15	62.32	5.43	0.14	1.31	1.67	0	0
ILMN_1224619	St3gal1	15	66.9	rs13482623	15	66.75	Y	Y	31.41	60.75	25.43	27.17	1		rs3708614	15	67.95	0.7	0.94	0.06	0.98	0	0
ILMN_2492264	Wisp1	15	66.8	rs13482623	15	66.75	Y	Y	25.37	22.76	11.33	14.36	2		rs3708614	15	67.95	0.64	2.07	0.43	0.06	0	0
ILMN_1238224	Eny2	15	44.2	D15MIt105	15	72.33	Y	N	26.57	0.07	1.04	0.45	2		D15MIt105	15	72.33	0	0	0	0	0	0
ILMN_1238862	Rapgef3	15	97.6	rs3023427	15	97.54	Y	Y	88.6	73.57	64.34	57.43	1		rs13482731	15	97.59	18.99	38.24	18.21	19.27	3	0
ILMN_1217552	Zhx1	15	57.9	rs13482731	15	97.59	Y	N	1.95	8.13	3.59	25.25	5		rs13482731	15	97.59	0.01	1.34	1.81	3.43	0	0
ILMN_1238109	Pp11r	15	97.5	rs13482732	15	97.96	Y	Y	5.57	5.88	0.46	26.34	5		rs13482732	15	97.96	0.31	1.03	0.15	0.05	0	0
ILMN_1246054	Col2a1	15	97.8	rs13482732	15	97.96	Y	Y	12.48	3.78	31.04	2.21	4		rs13482732	15	97.96	8.2	3.62	3.98	0.86	0	0
ILMN_1248184	Senp1	15	97.9	rs13482732	15	97.96	Y	Y	82.65	82.93	80.37	67.19	1		rs13482732	15	97.96	13.73	23.03	18.52	5.5	0	0
ILMN_1260175	Golga3	5	111	rs13482732	15	97.96	N	N	5.87	2.51	10.3	26.97	5		rs13482732	15	97.96	0.91	2.27	0.04	0.04	0	0
ILMN_1253268	Ccdc65	15	98.6	rs13482734	15	98.55	Y	Y	42.22	22.97	27.17	34.12	14		rs13482734	15	98.55	11.27	8.32	2.53	1.48	0	0
ILMN_2643241	Accn2	15	99.5	rs13482734	15	98.55	Y	Y	15.07	33.05	17.71	39.67	10		rs13482734	15	98.55	0.01	0.02	3.04	0	0	0
ILMN_2742937	Slc4a8	15	101	rs13482734	15	98.55	Y	Y	27.65	24.19	14.1	19.84	6		rs13482734	15	98.55	12.54	3.23	3.4	0.1	0	0
ILMN_2771396	Prkag1	15	98.6	rs13482734	15	98.55	Y	Y	28.99	20.02	24.56	27	14		rs13482734	15	98.55	0.33	0.05	7.59	1.78	0	0
ILMN_1213975	Slc4a8	15	101	rs6284372	15	99.34	Y	Y	29.86	41.35	41.03	50.98	1		gnf15.098.211	15	98.89	5.68	0.02	0.62	1.01	0	0
ILMN_1216872	Nrxn3	12	90.5	rs6284372	15	99.34	N	N	0.58	0.2	1.29	27.6	5		gnf15.098.211	15	98.89	1.7	2.97	0.8	2.15	0	0
ILMN_1236899	A830087P12Rik	15	100	rs6284372	15	99.34	Y	Y	58.93	60.64	43.77	59.54	1		gnf15.098.211	15	98.89	0.91	0.22	0.21	3.07	0	0
ILMN_1241919	Mettl7a	15	100	rs6284372	15	99.34	Y	Y	57.61	30.61	36.85	40	1		gnf15.098.211	15	98.89	3.33	0.41	1.31	0.4	0	0
ILMN_1243129	Slc11a2	15	100	rs6284372	15	99.34	Y	Y	34.96	42.52	23.62	25.26	13		gnf15.098.211	15	98.89	0.12	0.03	0.1	0.08	0	0
ILMN_1243895	C330013E15Rik	15	100	rs6284372	15	99.34	Y	Y	77.9	76.01	75.15	85.03	1		gnf15.098.211	15	98.89	1.52	3.07	5.86	3.42	0	0
ILMN_2484374	Scn8a	15	101	rs6284372	15	99.34	Y	Y	28.85	31.1	27.45	34.61	1		gnf15.098.211	15	98.89	2.9	0.07	0.49	0.02	0	0
ILMN_2516455	A330009N23Rik	15	101	rs6284372	15	99.34	Y	Y	12.81	44.61	31.01	9.25	9		gnf15.098.211	15	98.89	0.33	1.99	0.67	0.44	0	0
ILMN_2613558	Lass5	15	99.6	rs6284372	15	99.34	Y	Y	18.55	24.92	18.87	25.39	10		gnf15.098.211	15	98.89	0.54	0.01	1.38	0.28	0	0
ILMN_2616215	Letmd1	15	100	rs6284372	15	99.34	Y	Y	30.09	35.83	17.82	31.95	13		gnf15.098.211	15	98.89	0	0.67	0.33	0.09	0	0
ILMN_1237719	Grasp	15	101	rs13482741	15	100.95	Y	Y	56.65	53.37	46.51	41.37	1		rs3686133	15	102.19	6.09	1.87	0.32	0	0	0
ILMN_1231074	Sp7	15	102	UT_15_103.451774	15	101.25	Y	Y	33.23	25.72	16.01	17.71	6		rs3686133	15	102.19	17.92	29.67	18.26	19.52	3	0
ILMN_1250860	4732456N10Rik	15	101	UT_15_103.451774	15	101.25	Y	Y	49	49.19	42.03	36.78	1		rs3686133	15	102.19	0.15	1.85	0	0	0	0
ILMN_2751818	Krt2	15	102	UT_15_103.451774	15	101.25	Y	Y	19.11	9.97	24.31	24.45	11		rs3686133	15	102.19	0.74	0.14	0.25	4.07	0	0
ILMN_1219703	Myg1	15	102	rs3686133	15	102.19	Y	Y	38.8	45.44	65.19	37.46	1		rs3686133	15	102.19	11.81	22.54	8.78	22.67	0	0
ILMN_1225033	Myg1	15	102	rs3686133	15	102.19	Y	Y	15.12	24.47	38.03	25.49	15		rs3686133	15	102.19	5.43	13.24	16.59	15.11	0	0
ILMN_1223544	Copz1	15	103	rs4231033	15	103.13	Y	Y	70.61	72.75	65.64	52.38	1		rs4231033	15	103.13	20.23	43.2	36.37	29.96	15	0
ILMN_2529145	LOC229544	3	90.5	rs4231033	15	103.13	N	N	26.42	1.93	0.23	0.01	2		rs4231033	15	103.13	0.02	3.1	0.04	0.18	0	0
ILMN_1220761	Mpv17l	16	14	rs4163042	16	13.06	Y	Y	20.59	19.63	41.94	23.29	4		rs4163042	16	13.14	3.56	12.11	2.84	0.57	0	0
ILMN_2505392	Lkap	16	14.1	rs4163042	16	13.06	Y	Y	44.93	53.68	45.83	46.43	1		rs4163042	16	13.14	23.23	11.8	11.39	10.68	0	0
ILMN_1227844	Abcc1	16	14.5	rs4164131	16	14.29	Y	Y	5.88	3.58	6.32	25.71	5		rs4164131	16	14.38	2.94	0	0.48	0.13	0	0
ILMN_2694055	4921513D23Rik	16	14.1	rs4164131	16	14.29	Y	Y	57.63	55.7	57.75	40.31	1		rs4164131	16	14.38	41.92	74.02	25.26	37.26	13	0
ILMN_2641228	Hspa12b	2	131	rs4165338	16	23.59	N	N	25.74	1.49	0.53	1.65	2		D16Mit101	16	23.74	3.21	0.01	0.76	0.01	0	0
ILMN_1238902	Lpp	16	24.7	rs4165425	16	23.71	Y	Y	25.88	21.07	33.45	37.74	14		rs4165425	16	23.8	3.28	1.03	0.63	2.3	0	0
ILMN_2569706	Lpp	16	24.7	rs4165425	16	23.71	Y	Y	21.23	28.81	34.7	29.9	15		rs4165425	16	23.8	3.31	1.38	0.39	0.24	0	0
ILMN_2683856	Noxo1	17	24.8	D16Mit103	16	31.9	N	N	4.4	24.92	1.15	3.54	3		rs4170074	16	32.19	0.06	0.43	1.24	0.44	0	0
ILMN_2720925	0610012D17Rik	16	32.4	D16Mit103	16	31.9	Y	Y	22.94	21.73	36.38	28.46	11		rs4170074	16	32.19	9.19	4.25	0.37	0.71	0	0
ILMN_1224913	LOC381044	16	34.2	rs4170974	16	32.88	Y	Y	60.07	73.15	66.56	56.08	1		rs4170474	16	32.68	2.27	9.13	19.91	12.3	0	0
ILMN_1224927	Dirc2	16	35.7	rs4170974	16	32.88	Y	Y	42.15	41.03	49.25	29.82	1		rs4170474	16	32.68	5.56	29.21	7.89	10.88	3	0
ILMN_1234403	B230112L11Rik	16	34.2	rs4170974	16	32.88	Y	Y	20.94	34.16	39.15	23.83	9		rs4170474	16	32.68	2.73	12.39	2.89	0.18	0	0
ILMN_1243903	Hspbap1	16	35.8	rs4170974	16	32.88	Y	Y	23.61	31.31	9.28	8.78	3		rs4170474	16	32.68	1.4	3.13	2.28	4.52	0	0
ILMN_1246084	Lpp	16	24.7	rs4170974	16	32.88	Y	N	7.99	7.58	3.63	24.18	5		rs4170474	16	32.68	0.59	2.35	1.66	0.38	0	0
ILMN_1259025	Hspbap1	16	35.8	rs4170974	16	32.88	Y	Y	22.86	31.1	43.27	29.27	15		rs4170474	16	32.68	4.47	6.73	1.29	9.35	0	0
ILMN_2634235	Lrrc33	16	32.1	rs4170974	16	32.88	Y	Y	29.56	27.32	23.37	36.06	13		rs4170474	16	32.68	3.62	0.25	8.53	0.47	0	0
ILMN_1222763	Slc15a2	16	36.8	rs4173870	16	36.87	Y	Y	85.78	91.65	126.37	70.58	1		rs4173870	16	36.95	26.51	20.53	37.41	30.38	14	0
ILMN_2769216	Rwdd3	3	121	rs4173870	16	36.87	N	N	0.53	24.62	1.75	0.05	3		rs4173870	16	36.95	3.04	1.4	0.25	4.71	0	0
ILMN_1248796	Igsf11	16	39	rs4174556	16	38.35	Y	Y	70.84	74.65	51.06	49.03	1		rs4151928	16	38.38	7.09	12.68	4.58	7.08	0	0
ILMN_1229433	Tmprss7	16	45.7	D16Mit138	16	45.61	Y	Y	61.1	93.92	55.84	39.59	1		rs4181286	16	45.54	29.17	40.62	16.56	25.1	6	0
ILMN_2579504	Abhd10	16	45.7	D16Mit138	16	45.61	Y	Y	27.56	28.28	36.06	28.85	1		rs4181286	16	45.54	21.55	19.4	9.58	8.51	0	0
ILMN_1214541	Tas2r123	6	133	rs4186283	16	50.97	N	N	27.56	3.46	0.03	0.17	2		rs4186283	16	51.05	1.37	4.11	1	0.02	0	0
ILMN_1228262	Epha6	16	59.8	rs4188505	16	56.39	Y	Y	42.02	52.09	43.54	33.68	1		rs4188505	16	56.46	16.91	11.41	21.3	11.68	0	0
ILMN_1229830	Zeb2	2	44.9	rs4188505	16	56.39	N	N	0.01	0.85	31.44	1.83	4		rs4188505	16	56.46	0.33	0	0.07	0.05	0	0
ILMN_1233531	2610528E23Rik	16	57.3	rs4189119	16	56.91	Y	Y	58.76	74.7	70.61	55.33	1		rs4188825	16	56.65	37.1	57.46	51.28	40.72	1	1
ILMN_2699028	BC043118	16	59.5	rs4189119	16	56.91	Y	Y	36.91	44.91	28.37	29.28	1		rs4188825	16	56.65	15.46	17.83	18.33	14.46	0	0
ILMN_1243150	Traf3ip3	1	195	D16Mit47	16	61.51	N	N	25.95	14.24	0.38	0	2		rs4193194	16	61.49	0.47	0.23	0.35	0.02	0	0
ILMN_1214950	Mef2c	13	83.8	rs3675841	16	62.99	N	N	0	0.08	24.96	8.07	4		rs3687551	16	63.57	0.41	3.52	2.2	0.2	0	0
ILMN_1254141	Olfr1451	19	13.1	rs3675841	16	62.99	N	N	25.82	0.25	0.79	0.94	2		rs3687551	16	63.57	3.6	0.29	2.55	0.64	0	0
ILMN_2592881	Jam2	16	84.8	D16Mit190	16	84.79	Y	Y	20.72	29.92	12.2	13.41	3		rs4212088	16	85.09	0.01	0.15	3.84	0.47	0	0
ILMN_1243701	Grik1	16	87.9	rs4216686	16	89.48	Y	Y	9.21	19.7	25.57	14.97	4		rs4216686	16	89.59	5.3	0.5	0.01	0.56	0	0
ILMN_1235060	Pdia6	12	17.3	rs4219897	16	92.68	N	N	23.79	27.68	10.69	8.72	3		rs4219897	16	92.79	0.09	0.11	2.78	1.39	0	0
ILMN_2620803	Iah1	12	21.3	rs4219897	16	92.68	N	N	16.13	24.01	15.35	7.75	3		rs4219897	16	92.79	10.09	0.01	0.25	0.23	0	0
ILMN_2760057	BC068281	12	4.86	rs4219897	16	92.68	N	N	5.92	26.05	6.13	5.62	3		rs4219897	16	92.79	3.38	0	1.53	0.29	0	0
ILMN_2608811	Cbr3	16	93.7	rs4219905	16	92.89	Y	Y	34.26	33.94	31.26	34.23	1		rs4219905	16	93	19.34	7.64	9.46	19.97	0	0
ILMN_2774497	Ripk4	16	98	rs4221305	16	96.83	Y	Y	32.58	37.59	33.4	38.79	1		rs4221305	16	96.94	3.91	10.32	5.55	5.96	0	0
ILMN_2690441	Tfb1m	17	3.52	rs3721166	17	3.2	Y	Y	28.45	31.28	25.92	21.95	12		rs6310831	17	3.23	0.02	0.36	6.85	0.54	0	0
ILMN_1214706	Sash1	10	8.53	rs13482849	17	5.57	N	N	17.78	18.31	31.14	19.01	4		UT_17_3.221024	17	6.04	1.11	0.07	0.49	1.2	0	0
ILMN_1257127	LOC385755	16	15.5	rs3023673	17	6.95	N	N	23.85	41.89	39.79	23.9	9		rs3023673	17	7.3	0.92	0.47	4.02	9.56	0	0
ILMN_1236799	Ttll2	17	7.56	rs13482873	17	11.26	Y	Y	38.33	57.78	57.6	55.02	1		rs13482873	17	11.61	16.01	22.65	24.92	25.3	0	0
ILMN_1238562	Nthl1	17	24.8	rs13482873	17	11.26	Y	N	26.88	17.4	7.65	10.93	2		rs13482873	17	11.61	0.13	0.06	0.23	0.11	0	0
ILMN_1253860	Mas1	17	13	rs13482873	17	11.26	Y	Y	54.05	53.38	32.22	27.03	1		rs13482873	17	11.61	0.23	0.09	0.16	0.05	0	0
ILMN_2588911	Map3k4	17	12.4	rs13482873	17	11.26	Y	Y	24.99	29.23	25.52	27.38	1		rs13482873	17	11.61	10.95	5.17	17.46	6.71	0	0
ILMN_1250067	4932442K08Rik	17	15.5	rs13482891	17	15.19	Y	Y	21.83	25.22	24.41	23.09	9		rs3675740	17	16.4	0.12	0.01	0.14	0.78	0	0
ILMN_2617865	Gnptg	17	25.4	rs13482891	17	15.19	Y	N	24.44	27.72	11.37	21.7	6		rs3675740	17	16.4	6.22	3.75	5.63	4.34	0	0
ILMN_1217725	Lnpep	17	17.7	rs3675740	17	15.96	Y	Y	45.92	37.67	34.1	30.83	1		rs3675740	17	16.4	0.46	0	0.28	3.33	0	0
ILMN_1234412	A630033E08Rik	17	23	rs3675740	17	15.96	Y	N	95.13	86.26	69.66	90.42	1		rs3675740	17	16.4	14.32	30.59	10.37	13.85	3	0
ILMN_1240610	Noxo1	17	24.8	rs3675740	17	15.96	Y	N	20.96	28.79	43.09	28.1	15		rs3675740	17	16.4	5.01	4.19	3.65	10.27	0	0
ILMN_1242457	Fpr-rs2	17	18	rs3675740	17	15.96	Y	Y	78.5	93.48	65.7	72.1	1		rs3675740	17	16.4	43.79	54.19	38.33	53.12	1	1
ILMN_1244199	EG240038	17	22.3	rs3675740	17	15.96	Y	N	47.09	57.31	51.6	57.75	1		rs3675740	17	16.4	8.42	16.09	9.43	19.56	0	0
ILMN_1251142	3110052M02Rik	17	21.8	rs3675740	17	15.96	Y	N	46.03	49.41	45.63	51.34	1		rs3675740	17	16.4	17.85	39.17	21.6	19.48	3	0
ILMN_1256528	Flywch2	17	23.9	rs3675740	17	15.96	Y	N	13.71	24.34	18.31	21.45	3		rs3675740	17	16.4	0.24	1.93	0.06	0.07	0	0
ILMN_2496745	Ift140	17	25.2	rs3675740	17	15.96	Y	N	50.75	52.05	52.25	74.75	1		rs3675740	17	16.4	11.37	14.97	13.32	14.1	0	0
ILMN_2514655	Abca3	17	24.6	rs3675740	17	15.96	Y	N	107.68	117.78	78.27	111.1	1		rs3675740	17	16.4	9.06	16.48	2.13	4.58	0	0
ILMN_2649355	Stk19	17	35	rs3675740	17	15.96	Y	N	4.54	2.55	8.24	25.05	5		rs3675740	17	16.4	0.01	0	0	0.71	0	0
ILMN_2649810	Rpl3l	17	24.9	rs3675740	17	15.96	Y	N	60.49	50.07	25.38	23.94	12		rs3675740	17	16.4	4.71	0.03	2.27	0.4	0	0
ILMN_2650180	4931440B09Rik	17	24	rs3675740	17	15.96	Y	N	47.23	43.62	31.1	39.9	1		rs3675740	17	16.4	12.88	19.63	14.51	16.34	0	0
ILMN_2717117	4930546H06Rik	17	18	rs3675740	17	15.96	Y	Y	57.02	53.56	43.62	65.23	1		rs3675740	17	16.4	0	0.15	1.74	0.01	0	0
ILMN_2731999	Gnptg	17	25.4	rs3675740	17	15.96	Y	N	28.35	21.38	2.37	11.47	2		rs3675740	17	16.4	6.1	5.81	4.09	4.93	0	0
ILMN_2748229	Pkmyt1	17	23.9	rs3675740	17	15.96	Y	N	60.79	50.69	59.55	67.43	1		rs3675740	17	16.4	0.03	0.08	0.59	1.02	0	0
ILMN_3160203	Zfp213	17	23.7	rs3675740	17	15.96	Y	N	40.33	37.64	29.31	33.12	1		rs3675740	17	16.4	2.98	15.86	0.79	3.39	0	0
ILMN_1236364	LOC381821	6	134	rs8256992	17	25.1	N	N	26.34	1.74	2.01	0.07	2		rs3659741	17	24.99	0.59	1.14	1.82	0.43	0	0
ILMN_2679513	Rab40c	17	26	rs8256992	17	25.1	Y	Y	39.81	33.97	21.38	28.22	13		rs3659741	17	24.99	0.54	4.33	0.27	2.27	0	0
ILMN_2723083	Hcfc1r1	17	23.8	rs8256992	17	25.1	Y	Y	23.23	12.4	14.22	29.05	5		rs3659741	17	24.99	0.16	0.69	0.52	3.02	0	0
ILMN_1215218	C16orf24	17	25.9	D17Mit100	17	25.91	Y	Y	72.2	67.35	54.19	63.5	1		rs13459150	17	26.35	2.79	0.44	0.51	0	0	0
ILMN_2655144	Lmf1	17	25.8	D17Mit100	17	25.91	Y	Y	36.23	28.18	16.11	16.24	6		rs13459150	17	26.35	1.58	0.69	1.09	0	0	0
ILMN_2588130	LOC56628	17	36.3	D17Mit34	17	34.35	Y	Y	16.86	18.35	7.4	26.85	5		gnf17.035.152	17	35.19	3.05	3.77	1.89	0.07	0	0
ILMN_2722058	Rab26	17	24.7	D17Mit34	17	34.35	Y	N	1.54	5.73	4.86	26.74	5		gnf17.035.152	17	35.19	1.22	0.02	0.37	2.87	0	0
ILMN_1228796	Atp6v1g2	17	35.4	mCV22965443	17	34.75	Y	Y	34.41	34.51	47.16	40.24	1		mCV22965443	17	35.28	1.46	0.45	0.44	0.86	0	0
ILMN_1239632	Ng23	17	35.2	mCV22965443	17	34.75	Y	Y	45.34	44.92	46.44	42.87	1		mCV22965443	17	35.28	1.55	14.52	13.25	4.17	0	0
ILMN_1248382	H2-D1	17	35.4	mCV22965443	17	34.75	Y	Y	60.86	63.81	45.4	59.2	1		mCV22965443	17	35.28	20.1	30.89	32	33.84	15	0
ILMN_1251909	Vars2	17	35.8	mCV22965443	17	34.75	Y	Y	54.03	36.92	30.24	24.33	1		mCV22965443	17	35.28	8.28	15.71	22.56	9.7	0	0
ILMN_2476267	H2-L	17	35.4	mCV22965443	17	34.75	Y	Y	115.45	148.43	122.87	143.63	1		mCV22965443	17	35.28	1.75	5.89	3.5	4.57	0	0
ILMN_1220986	H2-Q5	17	35	rs3682923	17	35.44	Y	Y	31.3	18.48	38.78	13.92	7		rs13482963	17	35.67	25.38	43	45.77	29.52	15	0
ILMN_1241618	Flot1	17	36	rs3682923	17	35.44	Y	Y	60.29	33.61	41.18	41.12	1		rs13482963	17	35.67	19.69	19.3	7.43	15.96	0	0
ILMN_1252831	2310014H01Rik	17	36	rs3682923	17	35.44	Y	Y	13	16.18	10.86	28.13	5		rs13482963	17	35.67	0.12	2.54	0.96	0.11	0	0
ILMN_2732816	H2-Q2	17	36.3	rs3682923	17	35.44	Y	Y	33.33	31.55	10.52	31.86	13		rs13482963	17	35.67	0.19	0.75	0.03	1.34	0	0
ILMN_2597987	Gpr116	17	43.6	rs3709304	17	42.89	Y	Y	91.74	81.66	81.16	51.65	1		rs3709304	17	43.56	58.15	69.27	80.83	56.59	1	1
ILMN_1229035	C87436	6	86.4	gnf17.044.067	17	43.11	N	N	0.44	0.22	3.76	25.21	5		rs3656008	17	43.77	0.36	0.15	3.94	0.58	0	0
ILMN_1247394	Slc25a27	17	43.8	gnf17.044.067	17	43.11	Y	Y	36.71	41.21	26.77	34.76	1		rs3656008	17	43.77	9.6	5.78	21	7.94	0	0
ILMN_2733717	Tdrd6	17	43.8	gnf17.044.067	17	43.11	Y	Y	88.46	89.88	67.37	76.88	1		rs3656008	17	43.77	24.56	36.34	27.69	16.29	9	0
ILMN_1229449	Zfp318	17	46.6	rs13482999	17	43.97	Y	Y	88.31	79.36	89.24	75.14	1		rs3677240	17	44.3	1.68	0.12	3.16	0.94	0	0
ILMN_1256171	Tmem63b	17	45.8	rs13482999	17	43.97	Y	Y	57.84	60.85	44.31	56.45	1		rs3677240	17	44.3	0.13	0.9	0.15	0.65	0	0
ILMN_2661407	Rpl7l1	17	46.9	rs13482999	17	43.97	Y	Y	49.49	62.03	51.9	51.57	1		rs3677240	17	44.3	3.16	1.73	0.44	0.17	0	0
ILMN_2734045	Mrpl14	17	45.8	rs13482999	17	43.97	Y	Y	88.62	65.74	65.82	74.73	1		rs3677240	17	44.3	0.17	4.78	1.97	1.8	0	0
ILMN_2680947	Tcte1	17	45.7	UT_17_44.961343	17	45.03	Y	Y	29.85	29.08	15.42	27.8	13		UT_17_44.961343	17	45.7	0.09	0.13	0.04	7.29	0	0
ILMN_1232144	1110002E23Rik	17	47.7	rs6409750	17	46.8	Y	Y	16.72	22.27	18.78	25.49	5		rs13483008	17	47.87	3.57	8	15.31	9.17	0	0
ILMN_2723190	Guca1a	17	47.5	rs6409750	17	46.8	Y	Y	50.55	43.43	24.14	31.67	1		rs13483008	17	47.87	1.92	1.77	1.06	0.03	0	0
ILMN_2769630	Mrps10	17	47.5	rs6409750	17	46.8	Y	Y	84.47	94.43	84.35	83.9	1		rs13483008	17	47.87	0.43	0.1	0.37	1.13	0	0
ILMN_2495860	5430411C19Rik	17	66.4	CEL-17_64377461	17	65.91	Y	Y	40.15	18.93	21.35	25.48	8		rs6185805	17	66.71	0.5	7	4.02	0.57	0	0
ILMN_1246777	Ptprm	17	67	rs13483081	17	67.41	Y	Y	0.9	16.23	5.2	24.49	5		rs13483081	17	67.85	0.04	5.09	3.36	0.41	0	0
ILMN_1226107	Clip4	17	72.2	rs13483092	17	70.91	Y	Y	24.38	39	21.49	35.71	13		rs13483092	17	71.35	11.1	2.38	1.97	7.72	0	0
ILMN_1256724	Dlgap1	17	71	rs13483092	17	70.91	Y	Y	58.96	72.81	67.41	43.03	1		rs13483092	17	71.35	3.69	10.02	9.2	1.1	0	0
ILMN_1233545	Lbh	17	73.3	rs3675634	17	71.15	Y	Y	24.29	35.69	17.45	38.2	13		rs13483092	17	71.35	0.07	0.69	0	0.9	0	0
ILMN_2606470	Clip4	17	72.2	rs3675634	17	71.15	Y	Y	70.41	85.38	74.34	57.37	1		rs13483092	17	71.35	2.81	0.59	0.11	2.74	0	0
ILMN_1224658	Spast	17	74.8	rs13483101	17	73.25	Y	Y	7.48	15.98	5.44	24.98	5		rs3719059	17	74.04	0.6	2.38	0	1.49	0	0
ILMN_1227461	Birc6	17	75	rs13483101	17	73.25	Y	Y	32.78	20.15	16.5	11.45	2		rs3719059	17	74.04	1.58	7.14	0.95	7.02	0	0
ILMN_2769210	Spast	17	74.8	rs13483101	17	73.25	Y	Y	53.44	56.19	44.94	63.87	1		rs3719059	17	74.04	10.76	13.1	14.14	13.43	0	0
ILMN_1238733	Ttc27	17	75.3	rs13483103	17	74.11	Y	Y	70.65	94.96	137.65	64.02	1		rs6278810	17	74.13	68.43	67.22	44.75	57.77	1	1
ILMN_2769925	Alk	17	72.2	rs13483103	17	74.11	Y	Y	7.82	28.36	12.87	12.71	3		rs6278810	17	74.13	0.09	0.01	0.58	0.79	0	0
ILMN_1215216	C230011D21Rik	17	81.1	gnf17.081.038	17	79.64	Y	Y	39.78	27.27	27.93	46.15	1		rs3674040	17	79.88	0.01	0.84	0.37	0.36	0	0
ILMN_1219786	Morn2	17	80.7	gnf17.081.038	17	79.64	Y	Y	26.13	34.92	35.3	32.62	1		rs3674040	17	79.88	2.86	0.77	0.74	0.22	0	0
ILMN_1232716	Cyp1b1	17	80.1	gnf17.081.038	17	79.64	Y	Y	5.94	24.14	13.65	6.37	3		rs3674040	17	79.88	0.72	0.11	0.82	2.33	0	0
ILMN_1245583	ENSMUSG00000066938	17	80.8	gnf17.081.038	17	79.64	Y	Y	23.7	19.34	17.48	29.81	5		rs3674040	17	79.88	0.01	2.01	6.73	1.29	0	0
ILMN_2617925	Dhx57	17	80.6	gnf17.081.038	17	79.64	Y	Y	13.56	29.84	17.78	8.24	3		rs3674040	17	79.88	0.63	0.16	0.4	3.47	0	0
ILMN_2683718	Lrpprc	17	85.2	rs3706971	17	83.69	Y	Y	21	31.23	47.16	32.48	15		rs13483136	17	84.15	14.64	44.05	17.73	23.37	3	0
ILMN_1227866	Nrxn1	17	91.1	rs13483160	17	90.07	Y	Y	39.49	34.95	33.18	28.41	1		D17Mit221	17	90.49	1.39	6.41	3.99	9.93	0	0
ILMN_1233812	Ccny	18	9.39	rs3660245	18	9.27	Y	Y	26.17	14.75	19.22	14.62	2		rs13483198	18	9.49	0.12	0.37	0.01	2.52	0	0
ILMN_1243047	9430022F06Rik	18	9.28	rs3660245	18	9.27	Y	Y	24.42	24.19	23.89	9.78	6		rs13483198	18	9.49	0.16	3.08	0.55	0.43	0	0
ILMN_1255680	Ccny	18	9.32	rs3660245	18	9.27	Y	Y	19.34	47.42	21.83	20.42	3		rs13483198	18	9.49	0.29	0	1.53	0.03	0	0
ILMN_2427454	Npc1	18	12.4	rs3660245	18	9.27	Y	Y	15.38	25.05	6.68	24.87	10		rs13483198	18	9.49	0	0.23	3.31	0.4	0	0
ILMN_2744752	Riok3	18	12.3	rs3660245	18	9.27	Y	Y	18.24	40.6	16.43	9.74	3		rs13483198	18	9.49	0.02	0.01	1.84	0	0	0
ILMN_1217704	Slc16a14	1	84.9	rs4231742	18	11.08	N	N	0.05	0.63	0.27	25.71	5		rs4231742	18	11.08	2.15	0.58	0.98	0.16	0	0
ILMN_1228450	Kctd1	18	15.1	rs13483217	18	14.26	Y	Y	63.96	54.54	47.56	52.28	1		rs13483217	18	14.27	0.08	0.61	0.72	0.35	0	0
ILMN_1239955	Cdh2	18	16.8	D18Mit116	18	16.02	Y	Y	110.81	104.93	92.48	115.73	1		gnf18.012.857	18	15.8	7.26	22.84	12.56	16.53	0	0
ILMN_1258264	A830087C18Rik	18	25.8	rs13483254	18	24.3	Y	Y	21.37	16.5	19.49	29.29	5		rs13483254	18	24.32	1	0.31	0.23	0.42	0	0
ILMN_2421299	Zfp191	18	24.2	rs13483254	18	24.3	Y	Y	71.01	72.89	67.16	52.2	1		rs13483254	18	24.32	0	0.2	1	0.36	0	0
ILMN_2508595	Zfp35	18	24.2	rs13483254	18	24.3	Y	Y	73.31	71.68	85.95	59.25	1		rs13483254	18	24.32	0.39	0.93	0.16	1.17	0	0
ILMN_2518828	Znf24	18	24.2	rs13483254	18	24.3	Y	Y	34.61	39	17.41	33.66	13		rs13483254	18	24.32	0.47	0.13	0.27	0.05	0	0
ILMN_2650439	Galnt1	18	24.4	rs13483254	18	24.3	Y	Y	16.77	30.89	19.65	22.74	3		rs13483254	18	24.32	9.16	9.56	0.4	7.2	0	0
ILMN_1238882	Pik3c3	18	30.5	rs6367886	18	24.95	Y	N	16.32	28.59	24.54	14.49	9		rs6367886	18	24.96	0.42	0	0.02	0.23	0	0
ILMN_1256867	Slc25a26	6	94.6	rs6367886	18	24.95	N	N	2.91	6.47	24.02	2.52	4		rs6367886	18	24.96	0.61	0.03	2.88	0.03	0	0
ILMN_2454860	Cdh18	15	23.4	rs6367886	18	24.95	N	N	0.61	25.14	0.07	0.14	3		rs6367886	18	24.96	1.74	0.21	0.78	0.28	0	0
ILMN_2597022	5730494M16Rik	18	25.3	rs6367886	18	24.95	Y	Y	46.16	62.04	48.05	66.18	1		rs6367886	18	24.96	0.35	2.17	0.06	1.83	0	0
ILMN_3163221	5730494M16Rik	5	42.2	rs6367886	18	24.95	N	N	59.16	60.13	66.05	73.49	1		rs6367886	18	24.96	1.12	1.58	0.01	3.88	0	0
ILMN_1228667	Pcdhga10	18	37.9	rs13483269	18	28.44	Y	N	27.83	18.19	27.95	17.7	7		rs13483269	18	28.46	7.11	6.74	9.91	4.65	0	0
ILMN_1231598	Sap130	18	31.7	rs13483269	18	28.44	Y	Y	24.92	23.41	32.6	27.9	14		rs13483269	18	28.46	1.3	0.06	1.51	1.74	0	0
ILMN_1237399	Rit2	18	31.1	rs13483269	18	28.44	Y	Y	21.01	29.04	30.87	11.8	9		rs13483269	18	28.46	0.37	1.14	1.45	0.47	0	0
ILMN_1238927	2810028B13Rik	18	32.1	rs13483269	18	28.44	Y	Y	63.66	68.91	50.3	51.73	1		rs13483269	18	28.46	0.3	0.68	0.33	3.99	0	0
ILMN_2458671	Vldlr	19	27.3	rs13483269	18	28.44	N	N	34.99	14.42	5.2	25.4	8		rs13483269	18	28.46	0.33	4.55	6.65	3.86	0	0
ILMN_2628339	Bin1	18	32.6	rs13483269	18	28.44	Y	Y	58.72	64.66	53.3	59	1		rs13483269	18	28.46	0.03	0.26	1.62	1.08	0	0
ILMN_2673344	Slc25a46	18	31.7	rs13483269	18	28.44	Y	Y	46.37	29.11	33.37	35.64	1		rs13483269	18	28.46	0.45	0.54	7.55	0.34	0	0
ILMN_2690014	Syt4	18	31.6	rs13483269	18	28.44	Y	Y	40.1	32.05	34.39	39.84	1		rs13483269	18	28.46	0.09	0.18	3.44	0.22	0	0
ILMN_2730478	Pik3c3	18	30.5	rs13483269	18	28.44	Y	Y	17.41	35.12	24.32	35.12	15		rs13483269	18	28.46	0	0.46	2.83	1.75	0	0
ILMN_2738345	Lims2	18	32.1	rs13483269	18	28.44	Y	Y	14.88	24.05	45.27	32.82	15		rs13483269	18	28.46	4.38	2.02	0.02	4.97	0	0
ILMN_1247916	Lims2	18	32.1	D18Mit200	18	32.47	Y	Y	17.96	10.95	26.33	23.23	4		gnf18.030.225	18	32.9	0.62	3.45	2.09	2.96	0	0
ILMN_2687503	4921510J17Rik	11	105	D18Mit200	18	32.47	N	N	1.91	24.79	0.95	0.38	3		gnf18.030.225	18	32.9	1	1.35	0.35	0.27	0	0
ILMN_1216692	Pcdhb12	18	37.6	gnf18.030.225	18	32.88	Y	Y	34.95	36.39	32.58	27.51	1		gnf18.030.225	18	32.9	0.42	15.63	3	3.1	0	0
ILMN_1229721	Camk4	18	33.4	gnf18.030.225	18	32.88	Y	Y	32.37	60.24	54.56	48.96	1		gnf18.030.225	18	32.9	24.04	38.69	16.8	20.32	3	0
ILMN_1233779	Epb4.1l4a	18	34	gnf18.030.225	18	32.88	Y	Y	17.6	27.52	25.27	26.34	15		gnf18.030.225	18	32.9	6.26	21.37	8.77	27.56	5	0
ILMN_1235004	Pcdha8	18	37.2	gnf18.030.225	18	32.88	Y	Y	38.34	52.71	65.34	42.99	1		gnf18.030.225	18	32.9	13.61	19.02	6.49	5.81	0	0
ILMN_1240445	Stard4	18	33.4	gnf18.030.225	18	32.88	Y	Y	27.76	38.03	27.18	22.88	12		gnf18.030.225	18	32.9	7.83	11.63	6.26	7.02	0	0
ILMN_2455304	Camk4	18	33.4	gnf18.030.225	18	32.88	Y	Y	43.01	59.62	55.44	46.03	1		gnf18.030.225	18	32.9	19.19	59.9	25.16	34.9	10	0
ILMN_2705452	Pcdhga8	18	37.9	gnf18.030.225	18	32.88	Y	N	15.81	24.1	24.16	18.09	9		gnf18.030.225	18	32.9	2.71	19.52	16.15	14.73	0	0
ILMN_2708107	Camk4	18	33.4	gnf18.030.225	18	32.88	Y	Y	27.44	30.68	34.97	34.66	1		gnf18.030.225	18	32.9	33.61	73.1	35.63	59.64	1	1
ILMN_2711955	Pcdhb9	18	37.6	gnf18.030.225	18	32.88	Y	Y	24.82	29.61	26.21	10.7	12		gnf18.030.225	18	32.9	0.42	0.36	1.26	0.11	0	0
ILMN_2722632	Pcdhgb6	18	37.9	gnf18.030.225	18	32.88	Y	N	19.54	28.14	8.34	10.71	3		gnf18.030.225	18	32.9	9.28	15.34	9.75	15.8	0	0
ILMN_2746009	Pcdhga2	18	37.8	gnf18.030.225	18	32.88	Y	Y	38.5	35.35	38.28	42.94	1		gnf18.030.225	18	32.9	14.33	27.19	15.8	20.29	3	0
ILMN_1228204	D330025A21Rik	18	45	rs6355722	18	45.27	Y	Y	37.16	52.78	39.83	34.18	1		rs6355722	18	45.3	13.34	33.46	18.94	36.02	10	0
ILMN_1248354	EG225468	18	46.5	rs6355722	18	45.27	Y	Y	34.47	34.82	25.36	25.08	1		rs6355722	18	45.3	7.14	13.71	21.51	6.26	0	0
ILMN_1233444	A730017C20Rik	18	59.2	rs13483382	18	58.52	Y	Y	69.52	80.45	66.11	70.71	1		rs3713935	18	58.63	0.04	0.02	1.08	0.74	0	0
ILMN_1242658	4833446K15Rik	18	59.2	rs13483382	18	58.52	Y	Y	83.93	71.78	74.73	89.26	1		rs3713935	18	58.63	0.34	0.01	0.22	1.09	0	0
ILMN_1246992	A630042L21Rik	18	61.3	CEL-18_60214752	18	59.82	Y	Y	108.93	130.73	125.02	128.89	1		rs3713935	18	58.63	1.39	0.36	2.95	0	0	0
ILMN_2740115	St8sia3	18	64.4	rs3720827	18	63.42	Y	Y	23.05	22.39	19.4	25.02	5		rs13483407	18	65.69	0.03	0.53	4.43	0.69	0	0
ILMN_1216818	Malt1	18	65.6	rs4138277	18	65.57	Y	Y	33.23	33.24	20.51	42.46	13		rs13483407	18	65.69	0.89	0.9	2.08	1.34	0	0
ILMN_1241279	Afg3l2	18	66.7	rs4138277	18	65.57	Y	Y	61.09	55.17	55.92	65.63	1		rs13483407	18	65.69	13.18	11.4	12.42	14.4	0	0
ILMN_2438849	Zfp532	18	65.9	rs4138277	18	65.57	Y	Y	26	41.69	23.64	26.49	13		rs13483407	18	65.69	0.09	0.49	0.68	0.12	0	0
ILMN_1227624	Elac1	18	73.9	rs3661900	18	72.23	Y	Y	49.56	51.14	40.22	43.82	1		rs3663078	18	71.53	3.99	18.51	7	20.7	0	0
ILMN_1230263	Me2	18	73.9	rs3661900	18	72.23	Y	Y	66.82	96.26	82.59	55.35	1		rs3663078	18	71.53	17.37	19.66	12.78	16.42	0	0
ILMN_2706631	Smad4	18	73.8	rs3661900	18	72.23	Y	Y	25.04	23.67	28.25	17.17	7		rs3663078	18	71.53	7	12.43	0	1.45	0	0
ILMN_2756846	Mro	18	74	rs3661900	18	72.23	Y	Y	9.9	31.28	7.62	5.45	3		rs3663078	18	71.53	0.04	2.91	0.08	4.51	0	0
ILMN_1226868	Mapk4	18	74.1	rs6199678	18	75.03	Y	Y	12.66	42.59	21.53	27.22	10		rs13459193	18	74.9	0.46	2.89	4.52	1.56	0	0
ILMN_1227636	2810433K01Rik	18	74.2	rs6199678	18	75.03	Y	Y	39.01	54.23	49.34	42.83	1		rs13459193	18	74.9	18.18	22.15	19.58	13.08	0	0
ILMN_1228414	Smad2	18	76.5	rs13483444	18	76.26	Y	Y	39.62	55.67	32.69	38.42	1		rs13483444	18	76.3	9.77	20.28	23.96	7.44	0	0
ILMN_2629982	Hdhd2	18	77.2	rs13483446	18	76.87	Y	Y	18.89	22	17.89	27.4	5		rs13483446	18	76.9	15.09	9	4.96	18.35	0	0
ILMN_2745240	Hdhd2	18	77.2	rs13483446	18	76.87	Y	Y	39.15	37.93	42.98	43.01	1		rs13483446	18	76.9	10.86	4.79	5.43	16	0	0
ILMN_2418389	Nrxn2	19	6.53	rs13483511	19	6.54	Y	Y	24.26	9.44	12.49	19.51	2		rs13483511	19	6.54	0.26	14.68	3.51	3	0	0
ILMN_2766521	Esrra	19	6.99	rs13483511	19	6.54	Y	Y	21.91	17.41	31.39	26.3	11		rs13483511	19	6.54	17.56	8.44	3.5	6.07	0	0
ILMN_1248145	Zdhhc9	X	45.5	rs6413006	19	10.24	N	N	2.75	0.19	0.51	24.22	5		rs6413006	19	10.25	0.22	0.05	0.52	1.59	0	0
ILMN_1255162	Fads1	19	10.3	rs6413006	19	10.24	Y	Y	58.49	43.04	51.31	45.76	1		rs6413006	19	10.25	25.83	29.2	25	26.22	10	0
ILMN_1244266	A230083H22Rik	19	16.4	rs3669192	19	16.91	Y	Y	43.67	54.61	41.24	60.46	1		rs3686467	19	16.96	0.36	0.53	0.76	0.3	0	0
ILMN_1256299	Gcnt1	19	17.4	rs3669192	19	16.91	Y	Y	28.77	33.22	26.61	24.61	1		rs3686467	19	16.96	4.03	4.83	0.17	6.98	0	0
ILMN_2597778	Gna14	19	16.7	rs3669192	19	16.91	Y	Y	33.93	25.37	28.25	15.31	12		rs3686467	19	16.96	8.02	20.51	6.61	5.96	0	0
ILMN_1242106	BC016495	19	18.7	rs8267682	19	17.65	Y	Y	75.5	68.94	68.69	65.11	1		rs6246291	19	18.02	19.45	26.28	32.17	33.58	15	0
ILMN_1248532	Pcsk5	19	17.8	rs8267682	19	17.65	Y	Y	47.63	41.1	42.1	77.19	1		rs6246291	19	18.02	23.34	45.4	29.17	30.55	15	0
ILMN_2672297	Gcnt1	19	17.4	rs8267682	19	17.65	Y	Y	26.15	42.3	28.94	25.96	1		rs6246291	19	18.02	5.75	4.48	1.66	1.21	0	0
ILMN_1243587	2900017F05Rik	19	22.9	rs3707812	19	22.47	Y	Y	72.26	74.17	72.58	73.3	1		rs3672759	19	22.51	32.59	43.62	36.94	42.91	1	1
ILMN_1246417	B230104F01Rik	19	24	rs3707812	19	22.47	Y	Y	40.12	37.3	67.99	54.95	1		rs3672759	19	22.51	6.65	24.88	12.39	14.24	0	0
ILMN_1253083	Trpm3	19	22.8	rs3707812	19	22.47	Y	Y	44.4	38.33	32.56	28.62	1		rs3672759	19	22.51	21.2	27.08	12.55	18.93	3	0
ILMN_1253191	E230024B12Rik	19	23.2	rs3707812	19	22.47	Y	Y	79.67	57.13	63.14	73.54	1		rs3672759	19	22.51	20.95	27.83	10.13	15.48	3	0
ILMN_2438463	Ptar1	19	23.8	rs3707812	19	22.47	Y	Y	78.26	59.31	66.56	80.02	1		rs3672759	19	22.51	11.66	26.19	14.77	8.28	3	0
ILMN_2750558	Mamdc2	19	23.4	rs3707812	19	22.47	Y	Y	23.24	28.57	13	18.73	3		rs3672759	19	22.51	3.98	0.03	3.69	15.21	0	0
ILMN_1220560	Pgm5	19	24.8	rs6259521	19	24.01	Y	Y	46.13	33.44	33.84	32.34	1		rs6259521	19	24.02	28.56	36.71	18.25	18.49	6	0
ILMN_1230407	2900009I07Rik	19	24.6	rs6259521	19	24.01	Y	Y	95.6	96.61	107.83	82.74	1		rs6259521	19	24.02	16.3	47.48	25.13	24.18	3	0
ILMN_1256755	Apba1	19	24	rs6259521	19	24.01	Y	Y	43.13	44.19	27.83	20.45	12		rs6259521	19	24.02	6.23	20.94	25.96	7.85	0	0
ILMN_2416876	AI414343	19	24.1	rs6259521	19	24.01	Y	Y	46.85	37.68	29.99	28.48	1		rs6259521	19	24.02	7.67	12.93	1.32	7	0	0
ILMN_2709864	Cbwd1	19	25	rs6259521	19	24.01	Y	Y	72.28	91.86	87.24	67.56	1		rs6259521	19	24.02	25.71	58.28	27.15	17.22	9	0
ILMN_2711562	Pip5k1b	19	24.4	rs6259521	19	24.01	Y	Y	46.8	38.53	56.27	47.29	1		rs6259521	19	24.02	19.97	38.99	19.67	30.2	10	0
ILMN_1242724	Cdc37l1	19	29.1	rs3714482	19	29	Y	Y	24.9	46.82	33.82	36.84	1		D19Msw029	19	28.48	0.33	0.44	0.39	0.42	0	0
ILMN_2638349	Papss2	19	32.7	rs3714482	19	29	Y	Y	34.01	27.25	14.18	41.14	13		D19Msw029	19	28.48	0.4	2.83	0.33	1.8	0	0
ILMN_2673926	Cdc37l1	19	29.1	rs3714482	19	29	Y	Y	52.47	55.91	51.44	54.54	1		D19Msw029	19	28.48	4.81	0.01	0.82	0.71	0	0
ILMN_2749686	Cdc37l1	19	29.1	rs3714482	19	29	Y	Y	32.75	20.98	22.51	25.68	8		D19Msw029	19	28.48	0.33	1.84	1.84	0.23	0	0
ILMN_2466809	Papss2	19	32.7	D19Mit13	19	32.71	Y	Y	131.45	128.57	164.93	143.01	1		D19Mit13	19	32.71	56.32	87.31	75.48	54.07	1	1
ILMN_1242397	V2r15	7	7.26	rs13483609	19	36.65	N	N	0	0	0.03	24.14	5		rs13483609	19	36.66	1.16	1.67	3.35	7.16	0	0
ILMN_1239783	Ide	19	37.4	gnf19.035.258	19	37.53	Y	Y	52.62	60.34	69.31	61.13	1		gnf19.035.258	19	37.54	41.33	43.19	23.97	38.62	13	0
ILMN_1222658	Mga	2	120	rs13483617	19	38.37	N	N	5.84	7.71	24.31	9.91	4		rs13483617	19	38.38	0	1.17	0.27	0.9	0	0
ILMN_2613492	5730455O13Rik	19	38.3	rs13483617	19	38.37	Y	Y	20.88	39.52	43.23	30.72	15		rs13483617	19	38.38	7.32	21.13	13.32	1.53	0	0
ILMN_1218651	Dnmbp	19	43.9	rs3677115	19	40.64	Y	Y	18.87	13.98	25.84	8.34	4		rs3677115	19	40.66	3.39	6.55	9.12	5.44	0	0
ILMN_1243099	Lcor	19	41.6	rs3677115	19	40.64	Y	Y	15.28	12.83	27.85	19.22	4		rs3677115	19	40.66	7.38	7.19	9.97	12.49	0	0
ILMN_1247942	Mgea5	19	45.8	rs3677115	19	40.64	Y	N	12.59	14.39	10.22	25.51	5		rs3677115	19	40.66	3.3	2.25	1.53	1.61	0	0
ILMN_2694022	BC050092	9	22.1	D19Mit119	19	41.33	N	N	27.57	0.62	0.52	1.07	2		rs3653396	19	41.72	1.17	0.54	1.4	0.88	0	0
ILMN_1224534	Exosc1	19	42	rs3653396	19	41.7	Y	Y	67.76	74.19	65.5	52.4	1		rs3653396	19	41.72	3.31	0.25	0.1	0.2	0	0
ILMN_1257623	Lcor	19	41.4	rs3653396	19	41.7	Y	Y	39.21	59.12	38.07	36.3	1		rs3653396	19	41.72	16.51	7.81	5.8	6.01	0	0
ILMN_2675333	BC023055	19	42.2	rs3653396	19	41.7	Y	Y	39.46	61.36	54.54	49.69	1		rs3653396	19	41.72	0.31	0.16	5.21	0.02	0	0
ILMN_1217043	Got1	19	43.6	rs13483631	19	42.3	Y	Y	15.68	28.23	15.59	11.54	3		rs13483631	19	42.32	2.36	0.02	0.54	1.81	0	0
ILMN_1250916	D19Ertd386e	19	42.7	rs13483631	19	42.3	Y	Y	29.45	26.24	11.28	11.74	6		rs13483631	19	42.32	5.94	3.94	11.65	4.24	0	0
ILMN_2470360	BC037704	19	43.8	rs13483631	19	42.3	Y	Y	50.27	65.02	70.12	46.08	1		rs13483631	19	42.32	35.96	21.08	10.8	28.43	8	0
ILMN_2657394	Cnnm1	19	43.6	rs13483631	19	42.3	Y	Y	51.46	32.72	66.41	60.16	1		rs13483631	19	42.32	22.42	30.04	24.27	17.54	3	0
ILMN_2722129	Hps1	19	42.8	rs13483631	19	42.3	Y	Y	92.76	89.55	109.92	57.66	1		rs13483631	19	42.32	37.17	33.63	41.24	24.28	12	0
ILMN_2755585	Avpi1	19	42.2	rs13483631	19	42.3	Y	Y	15.5	17.92	26.05	14.11	4		rs13483631	19	42.32	10.79	7.01	4.19	3.34	0	0
ILMN_1217021	Sfxn3	19	45.1	rs3726430	19	44.19	Y	Y	30.01	37.32	24.35	22.14	12		rs13483639	19	44.27	2.15	2.35	2.09	0.51	0	0
ILMN_1249560	4833409A17Rik	19	42.8	rs3726430	19	44.19	Y	Y	3.35	24.62	10.03	1.53	3		rs13483639	19	44.27	3.37	8.91	5.63	9.01	0	0
ILMN_1257336	Cwf19l1	19	44.2	rs3726430	19	44.19	Y	Y	65.62	64.93	63.04	54.84	1		rs13483639	19	44.27	2.12	0.94	0.09	0.13	0	0
ILMN_2601758	Gsto2	19	48	rs3726430	19	44.19	Y	Y	15.32	26.3	4.05	10.66	3		rs13483639	19	44.27	1.28	1.07	0.93	4.18	0	0
ILMN_2674822	Nt5c2	19	47	rs3726430	19	44.19	Y	Y	24.95	16.8	24.47	26.83	14		rs13483639	19	44.27	1.83	5.23	8.38	3.03	0	0
ILMN_2731331	Pkd2l1	19	44.2	rs3726430	19	44.19	Y	Y	12.52	23.18	37.16	22.41	4		rs13483639	19	44.27	10.26	16.25	5.74	6.29	0	0
ILMN_1252502	Hif1an	19	44.6	CEL-19_43912943	19	44.63	Y	Y	64.86	61.16	61.87	49.84	1		CEL-19_43912943	19	44.65	9.44	32.14	10.29	21.1	3	0
ILMN_2609615	Rbm8a	3	96.4	CEL-19_43912943	19	44.63	N	N	31.25	13.05	16.13	10.15	2		CEL-19_43912943	19	44.65	0.51	0	2.78	0.66	0	0
ILMN_2690741	Btrc	19	45.6	CEL-19_43912943	19	44.63	Y	Y	43.88	51.99	35.88	36.08	1		CEL-19_43912943	19	44.65	4.04	7.52	1.08	4.12	0	0
ILMN_1216734	Sfxn3	19	45.1	D19Mit53	19	45.21	Y	Y	19.47	25.64	12.35	14.93	3		rs13483641	19	45.07	12.9	9.69	2.4	21.27	0	0
ILMN_1238801	Arl3	19	46.6	D19Mit53	19	45.21	Y	Y	79.11	112.78	97.44	65.27	1		rs13483641	19	45.07	37.93	79.76	37.17	71.77	1	1
ILMN_1251041	Btrc	19	45.6	D19Mit53	19	45.21	Y	Y	59.83	73.1	59.48	51.37	1		rs13483641	19	45.07	22.43	27.17	11	21.09	3	0
ILMN_1252475	Gm969	19	48.1	D19Mit53	19	45.21	Y	Y	18.36	8.43	24.27	13.38	4		rs13483641	19	45.07	8.86	35.95	5.96	11.24	3	0
ILMN_2470799	Tmem20	19	38.5	D19Mit53	19	45.21	Y	N	2.83	32.81	6.86	8.01	3		rs13483641	19	45.07	0.03	0	0.88	1.42	0	0
ILMN_2748300	2010012O05Rik	19	46.8	D19Mit53	19	45.21	Y	Y	74.4	99.4	82.63	61.1	1		rs13483641	19	45.07	13.18	23.66	12.65	13.81	0	0
ILMN_2651234	Col7a1	9	109	rs13483658	19	49.94	N	N	24.83	0.03	0	0.05	2		rs13483657	19	49.56	0	2.63	1.26	0.98	0	0
ILMN_1227593	Frat1	19	41.9	rs13483666	19	51.43	Y	N	13.03	24.42	3.73	7.19	3		rs13483666	19	51.45	1.4	0.03	0.47	3.99	0	0
ILMN_1247736	4933426K21Rik	6	122	rs13483669	19	52.26	N	N	18.07	20.16	27.49	9.74	4		rs13483669	19	52.28	0.34	0.88	0	0.68	0	0
ILMN_2480180	Vti1a	19	55.7	rs13483683	19	55.58	Y	Y	24.55	27.8	25.35	21.92	12		rs13483683	19	55.6	10.63	10.86	6.02	21.01	0	0
ILMN_2484918	Vti1a	19	55.7	rs13483683	19	55.58	Y	Y	19.74	25.97	17.12	31.76	10		rs13483683	19	55.6	6.4	10.64	9.02	14.44	0	0
ILMN_1250913	9930023K05Rik	19	56.6	rs3023497	19	56.66	Y	Y	37.78	26.71	26.23	22.17	12		rs3023497	19	56.68	10.01	16.06	17.42	9.67	0	0
ILMN_2590321	Nhlrc2	19	56.7	rs3023497	19	56.66	Y	Y	32.32	31.9	19.02	34.73	13		rs3023497	19	56.68	8.5	27.57	11.76	16.11	3	0
ILMN_1229783	Hspa12a	19	58.9	rs6259462	19	57.95	Y	Y	25.36	33.6	31.04	43.88	1		rs6259462	19	57.97	3.61	4.38	2.32	4.37	0	0
ILMN_2429356	Emx2os	19	59.5	rs6259462	19	57.95	Y	Y	35.15	27.97	19.46	42.85	13		rs6259462	19	57.97	1.9	2.01	1.37	5.87	0	0
ILMN_2452400	Slc18a2	19	59.4	rs6259462	19	57.95	Y	Y	22.22	24.16	17.36	20.48	3		rs6259462	19	57.97	0.02	4.9	2.44	0.93	0	0
ILMN_2512949	Steap3	1	122	rs6259462	19	57.95	N	N	0.52	0.14	26.25	1.51	4		rs6259462	19	57.97	0.73	0.89	2.48	7.47	0	0
ILMN_2720911	6430537H07Rik	19	59.1	rs6259462	19	57.95	Y	Y	33.96	19.53	20.88	21.83	2		rs6259462	19	57.97	1.79	2.14	2.32	3.96	0	0
ILMN_1248840	Sfxn4	19	60.9	D19Mit6	19	61.11	Y	Y	74.21	79.83	78.54	69.14	1		mCV23482939	19	61.12	12.96	14.96	23.58	9.19	0	0
ILMN_2438762	Ttll7	3	147	D19Mit6	19	61.11	N	N	0.25	0	0.22	25.06	5		mCV23482939	19	61.12	0.15	1.8	0.22	0	0	0
ILMN_1248326	Ddc8	11	118	CEL-X_8498891	X	9.32	N	N	0.04	0.26	0.04	25.12	5		rs13483716	X	10.02	0	0.18	0.41	1.66	0	0
ILMN_2715546	Gpx3	11	54.7	rs13483731	X	38.7	N	N	5.97	7.38	24.14	9.5	4		rs13483731	X	39.81	0.3	2.79	0.44	1.09	0	0
ILMN_2649484	Nlrp4b	7	11.3	rs13483737	X	44.12	N	N	0.03	0.73	28.53	0.14	4		rs13483737	X	45.23	0	0.1	5.78	0.01	0	0
ILMN_1226468	Csde1	3	103	rs13483805	X	86.45	N	N	0.42	6.26	4.58	31.06	5		rs13483805	X	87.44	1.52	0.8	1.86	3.01	0	0
ILMN_1213975	Slc4a8	15	101	gnfX.080.189	X	92.39	N	N	10.4	16.48	22.9	29.35	5		rs13483881	X	90.52	0.25	0.06	1.35	1.51	0	0
ILMN_2769795	Phkg1	5	130	rs13484015	X	131.48	N	N	25.24	3.64	0.08	19.73	2		rs13484015	X	132.66	0.29	0.17	1.36	0.07	0	0
ILMN_1215983	Phf8	X	148	rs13484059	X	141.97	Y	N	36.07	37.22	47.55	32.12	1		rs13484060	X	143.4	1.58	0.32	0.34	0.7	0	0
ILMN_2759619	Kctd12b	X	150	CEL-X_143595976	X	149.05	Y	Y	18.41	28.92	16.98	29.32	10		CEL-X_143595976	X	150.14	0.34	0.32	0.03	0.25	0	0
ILMN_1217489	Sms	X	60	rs13484093	X	152.43	Y	N	29.74	21.51	23.49	21.59	2		rs13484097	X	154.74	0.16	0.25	0.01	0.03	0	0
ILMN_2594009	Fgd1	X	148	rs13484093	X	152.43	Y	Y	14.2	4.91	25.02	5.88	4		rs13484097	X	154.74	3.34	2.85	0.78	1.05	0	0

## Sheet: BXD_eQTLs
ProbeSetID	Symbol	GeneChr	GeneMb	BXD_Locus	BXD_MarkerChr	BXD_MarkerMb	Syntenic?	Cis?	BXD_SC_LRS	BXD_EC_LRS	BXD_SR_LRS	BXD_ER_LRS	BXD_Pattern		LXS_Locus	LXS_MarkerChr	LXS_MarkerMb	LXS_SC_LRS	LXS_EC_LRS	LXS_SR_LRS	LXS_ER_LRS	LXS_Pattern	Conserved Pattern
ILMN_1216713	Mrpl15	1	4.78	rs6269442	1	3.48	Y	Y	16.41	20.34	17.78	33.94	5		rs6269442	1	3.48	59.91	45.01	44.74	49.54	1	0
ILMN_2503166	C330011F01Rik	1	90.16	rs6269442	1	3.48	Y	N	13.14	43.2	19.61	43.25	10		rs6269442	1	3.48	69.74	61.97	62.24	71.56	1	0
ILMN_1250779	Mrpl15	1	4.77	rs6269442	1	3.48	Y	Y	18.2	26.4	30.27	39.1	15		rs6269442	1	3.48	28.96	17.88	32.77	17.86	7	0
ILMN_1252821	C8orf46	1	9.62	rs8236463	1	5.58	Y	Y	44	49.67	27.05	36.75	1		rs13475705	1	5.59	0.62	0.76	0.83	1.22	0	0
ILMN_1232875	Sgk3	1	9.89	D1Mit1	1	11.5	Y	Y	9.19	26.82	13.74	15.43	3		D1Mit1	1	11.51	5.57	0.12	0.91	0.11	0	0
ILMN_2573793	Ncoa2	1	13.17	rs3655978	1	13.37	Y	Y	10.82	26.31	13.64	20.08	3		D1Mit1	1	11.51	0.46	0.11	0.04	0.87	0	0
ILMN_2574754	Terf1	1	15.81	gnf01.013.065	1	16.11	Y	Y	7.81	26.62	9.79	19.07	3		rs13475737	1	15.44	0	0.25	0.71	1.75	0	0
ILMN_1228871	4921533L14Rik	1	22.77	gnf01.013.065	1	16.11	Y	N	2.94	10.77	32.25	13.28	4		rs13475737	1	15.44	33.72	24.5	29.54	36.55	1	0
ILMN_2743003	Ly96	1	16.7	gnf01.013.065	1	16.11	Y	Y	25.89	56.42	49.67	47.79	15		rs13475737	1	15.44	0.59	3.06	0.03	0.16	0	0
ILMN_2558387	Kcnq5	1	21.95	rs3670611	1	20.62	Y	Y	32.87	88.79	66.33	55.46	1		rs6273788	1	20.26	47.23	40.23	43.85	44.8	1	1
ILMN_1244310	Gm106	1	15.85	rs3670611	1	20.62	Y	Y	18.04	27.61	10.6	19.24	3		rs6273788	1	20.26	7.81	0	0.5	2.58	0	0
ILMN_2425477	Zfp51	17	21.6	mCV23695025	1	22.15	N	N	1.75	1.6	3.43	26.35	5		mCV23695025	1	22.16	0.61	0.1	1.42	0.35	0	0
ILMN_2669708	B3gat2	1	23.85	rs13475765	1	23.77	Y	Y	10.98	29.31	15.56	41.35	10		rs13475765	1	23.82	36.7	48.28	44.27	35.44	1	0
ILMN_1244190	Bai3	1	25.33	rs13475771	1	25.38	Y	Y	12.61	9.92	23	29.12	5		D1Mit211	1	25.57	36.36	28.58	25.28	25.02	1	0
ILMN_1220636	Lrrc37a	11	103.31	rs13475772	1	25.52	N	N	0.03	0.48	0.35	26.32	5		rs13475772	1	25.63	0.02	0	6.36	0.3	0	0
ILMN_1223414	Ptp4a1	1	31	rs3677683	1	27.21	Y	Y	20.04	37.28	21.12	20.65	3		mCV25266528	1	27.85	10.41	19.72	10.89	7.85	0	0
ILMN_1222451	Dst	1	34.24	rs13475795	1	32.44	Y	Y	33.91	57.14	28.27	30.26	1		rs3088844	1	32.76	57.47	56.03	38.56	50.11	1	1
ILMN_1255365	Txndc9	1	38.04	UT_1_38.719268	1	37.97	Y	Y	47.17	68.76	47.31	65.39	1		rs13475818	1	38.09	86.22	91.84	81.83	82.94	1	1
ILMN_2582871	Chst10	1	38.94	UT_1_38.719268	1	37.97	Y	Y	27.76	36.67	24.27	13.51	6		rs13475818	1	38.09	2.45	0	5.21	0.22	0	0
ILMN_1235044	Myo1b	1	51.83	rs13475876	1	55.07	Y	Y	6.5	33.44	3.36	7.18	3		rs13475875	1	54.8	1.93	0.26	0.23	0.03	0	0
ILMN_2453120	C130065N10Rik	1	58.58	rs3686293	1	58.06	Y	Y	18.96	26.57	6.15	16.84	3		rs3686293	1	58.17	25.95	36.5	25.57	44.25	1	0
ILMN_1233713	Als2cr4	1	59.16	rs13475883	1	59.32	Y	Y	16.71	34.22	27.62	10.33	9		D1Mit161	1	59.28	28.41	36.79	50.18	55.5	1	0
ILMN_2492181	A930038D23Rik	1	75.56	rs3687595	1	72.62	Y	Y	14.44	24.45	15.97	27.52	5		rs6163328	1	72.86	0.96	0.64	0.47	0.05	0	0
ILMN_2421925	Wdfy1	1	79.7	mCV23431007	1	80.2	Y	Y	15.57	33.39	37.16	32.85	15		mCV23431007	1	80.32	3.02	3.32	0.01	0	0	0
ILMN_2598181	3110079O15Rik	1	89.37	rs3678377	1	87.62	Y	Y	21.68	26.96	16.24	32.96	10		gnf01.085.746	1	87.68	1.09	0.37	2.01	0.06	0	0
ILMN_1239630	Ramp1	1	93.09	rs13475979	1	93.15	Y	Y	13.37	27.83	30.83	6.92	9		rs3702854	1	92.72	1.33	4.23	0.01	0.04	0	0
ILMN_2773540	Thap4	1	95.6	rs13475989	1	95.84	Y	Y	34.64	46.23	25.77	40.35	13		rs13475985	1	94.85	0.2	0.05	1.29	0	0	0
ILMN_1245008	Gin1	1	99.67	rs13475993	1	96.81	Y	Y	46.91	58.48	39.21	55.35	1		rs13475985	1	94.85	0.45	0.18	0.07	0.35	0	0
ILMN_2628406	Cdh20	1	106.89	rs13476030	1	106.7	Y	Y	26.28	28.21	13.39	12.48	6		D1Mit135	1	107.21	0	2.01	0.05	1.86	0	0
ILMN_2512949	Steap3	1	122.09	rs13476077	1	120.8	Y	Y	17.82	38.09	12.19	17.17	3		rs13476089	1	124.56	0.83	0.19	0.4	0.15	0	0
ILMN_1239134	Lypd1	1	127.77	rs13476083	1	123.29	Y	Y	34.1	59.52	53.63	61.04	1		rs13476089	1	124.56	31.22	35.37	34.68	32.73	1	1
ILMN_1217331	Mcm6	1	130.23	gnf01.128.089	1	130.29	Y	Y	29.08	54.2	32.41	35.3	1		rs13476106	1	130.67	0.29	0.08	0.01	0.03	0	0
ILMN_2672943	Cntn2	1	134.41	gnf01.128.089	1	130.29	Y	Y	18.09	39.12	14.76	18.71	3		rs13476106	1	130.67	34.81	37.76	46.42	33.78	1	0
ILMN_1233857	Mcm6	1	130.23	gnf01.128.089	1	130.29	Y	Y	23.8	48.11	39.31	54.03	15		rs13476106	1	130.67	0.04	0.64	0.16	0	0	0
ILMN_2647873	Nav1	1	137.34	rs13476119	1	136.03	Y	Y	15.02	31.22	11.33	19.96	3		rs3664806	1	136.55	35.08	52.15	48.7	36.77	1	0
ILMN_1252022	B830045N13Rik	1	148.47	rs6202860	1	147.31	Y	Y	20.31	27.76	14.93	24.14	3		mCV23572856	1	147.42	47.84	26.44	19.88	31.44	13	0
ILMN_2535435	LOC383579	1	153.15	rs3711440	1	149.01	Y	Y	17.73	30.18	23.04	43.58	10		rs3688638	1	148.93	18.76	33.87	17.02	33.59	10	10
ILMN_2669982	1700025G04Rik	1	153.74	gnf01.148.750	1	151.05	Y	Y	17.62	58.08	32.55	32.93	15		rs13476178	1	152.62	35.61	35.39	39.46	54.55	1	0
ILMN_1242946	Arpc5	1	154.62	rs6267646	1	154.31	Y	Y	26.09	33.23	17.22	32.46	13		rs6267646	1	154.4	38.7	17.2	24.98	38.31	14	0
ILMN_1238170	Zfp648	1	155.75	CEL-1_152888326	1	154.68	Y	Y	25.51	42.14	22.71	33.45	10		CEL-1_152747565	1	154.63	42.79	54.53	40.29	45.83	1	0
ILMN_2600744	Rgs16	1	155.59	CEL-1_152888326	1	154.68	Y	Y	18.19	31.41	28.72	44.29	15		CEL-1_152747565	1	154.63	54.98	50.83	55.45	54.94	1	0
ILMN_2419998	Soat1	1	158.36	rs6194543	1	157.5	Y	Y	14.9	41.13	32.81	29.4	15		rs6181202	1	156.46	1.46	0.1	1.88	0.36	0	0
ILMN_2751215	Tor1aip1	1	157.85	D1Mit451	1	157.72	Y	Y	11.14	27.4	7.07	16.67	3		rs6181202	1	156.46	0.01	2.15	0.13	0.38	0	0
ILMN_2754220	Tor1aip2	1	157.92	D1Mit451	1	157.72	Y	Y	21.13	34.56	20.31	29.44	10		rs6181202	1	156.46	0.41	0.06	0.18	0.01	0	0
ILMN_1213985	2810025M15Rik	1	159.35	D1Mit451	1	157.72	Y	Y	37.7	65.22	25.92	54.79	13		rs6181202	1	156.46	0.43	0	2.04	1.73	0	0
ILMN_1247603	C530043G21Rik	1	158.61	D1Mit451	1	157.72	Y	Y	23.31	50.03	34.53	39.67	15		rs6181202	1	156.46	1.93	0	0.05	0	0	0
ILMN_1233127	AI316802	1	161.28	rs3653666	1	160.38	Y	Y	40.39	69.56	48.41	53.23	1		rs6318983	1	160.72	122.12	127.32	100.17	139.08	1	1
ILMN_1253602	4930523C07Rik	1	162.01	rs3653666	1	160.38	Y	Y	18.97	49.68	20.71	27.64	10		rs6318983	1	160.72	44.84	46.91	40.81	36.47	1	0
ILMN_1253906	Bat2d	1	164.6	D1Mit106	1	164.15	Y	Y	32.64	54.19	25.19	30.16	13		rs8256589	1	166	0.42	0.73	0.35	0.32	0	0
ILMN_2490981	A830054O07Rik	1	167.81	rs4222763	1	165.22	Y	Y	36.34	57.01	57.23	69.28	1		rs8256589	1	166	2.04	2.44	0.68	0.29	0	0
ILMN_1260046	Sft2d2	1	167.1	rs4222763	1	165.22	Y	Y	29.29	43.47	23.85	37.93	13		rs8256589	1	166	0.04	1.73	1.75	2.23	0	0
ILMN_1250531	Slc19a2	1	166.2	rs4222763	1	165.22	Y	Y	16.73	40.25	27.89	27.08	15		rs8256589	1	166	52.6	65.62	67.01	63.34	1	0
ILMN_1256907	Pbx1	1	170.05	D1Mit145	1	169.13	Y	Y	26.45	47.58	39.82	40.72	1		rs13476215	1	166.34	1.35	0.98	0.02	1.06	0	0
ILMN_2615035	Mgst3	1	169.3	D1Mit145	1	169.13	Y	Y	13.59	40.7	13.79	24.94	3		rs13476215	1	166.34	0.72	2.57	3.49	0	0	0
ILMN_1238479	Mgst3	1	169.3	D1Mit145	1	169.13	Y	Y	12.56	37.79	22.68	42.89	10		rs13476215	1	166.34	0.51	0.83	0.02	0.04	0	0
ILMN_2687403	Fcgr3	1	172.98	rs8242766	1	172.89	Y	Y	33.46	53.87	48.77	49.53	1		rs8242852	1	172.98	53.12	72.06	53.78	51.65	1	1
ILMN_2617468	Chac1	2	119.18	rs8242766	1	172.89	N	N	15.46	10.76	9.27	40.59	5		rs8242852	1	172.98	0	0.03	0	0.01	0	0
ILMN_1245118	Otud7a	7	70.9	rs8242766	1	172.89	N	N	0.74	0.48	0.32	26.24	5		rs8242852	1	172.98	0.64	0.13	0.43	0.39	0	0
ILMN_1247156	Apoa2	1	173.16	D1Mit113	1	173.64	Y	Y	44.74	4.77	25.72	14.33	2		rs8259388	1	174.25	67.72	87.53	85.79	61.03	1	0
ILMN_2775957	Apoa2	1	173.16	D1Mit113	1	173.64	Y	Y	44.84	3.95	38.8	19.02	7		rs8259388	1	174.25	76.04	85.05	65.53	54.4	1	0
ILMN_1242415	Kcnj9	1	174.25	NES13029525	1	174.11	Y	Y	26.35	43.36	29.3	52.65	1		rs8259388	1	174.25	50.38	40.52	42.95	42.13	1	1
ILMN_2656748	Darc	1	175.26	NES13029525	1	174.11	Y	Y	21.28	29.5	24.21	8.42	3		rs8259388	1	174.25	19.01	20.82	28.64	20.13	4	0
ILMN_1257771	Ifi205	1	175.95	D1Mit150	1	176.47	Y	Y	61.05	75.76	42.78	59.51	1		D1Mit541	1	176.4	60.91	77.11	67.77	56.76	1	1
ILMN_2617468	Chac1	2	119.18	D1Mit150	1	176.47	N	N	32.18	15.76	23.34	19	2		D1Mit541	1	176.4	0.12	0	0	0.54	0	0
ILMN_1217191	Fmn2	1	176.75	D1Mit150	1	176.47	Y	Y	28.33	29.9	3.23	16.87	6		D1Mit541	1	176.4	3.78	6.29	6.3	12.15	0	0
ILMN_2483422	Ifi204	1	175.8	D1Mit150	1	176.47	Y	Y	40.42	33.83	28.88	24	12		D1Mit541	1	176.4	26.85	19.29	20.57	22.14	2	0
ILMN_1217350	Gm821	1	182.37	rs13476267	1	182.12	Y	Y	28.43	13.26	25.22	15.15	2		rs6371431	1	180.86	0.11	0.24	0.17	0.31	0	0
ILMN_2424866	Cnih4	1	183.09	rs13476267	1	182.12	Y	Y	11.2	44.1	11.87	34.86	10		rs6371431	1	180.86	0.06	0.35	0.02	1.03	0	0
ILMN_1222512	9630055N22Rik	1	192.83	CEL-1_189026375	1	190.87	Y	Y	16.97	31.48	17.29	10.99	3		rs3654705	1	191.16	0.02	0	0.4	0.99	0	0
ILMN_2492956	Csn1s1	5	88.11	rs3675669	1	191.51	N	N	0.82	0.3	27.03	0.13	4		rs3699009	1	191.71	2.2	0	1.28	0.74	0	0
ILMN_2605512	Lamb3	1	195.17	rs8253327	1	193.61	Y	Y	8.25	7.67	7.37	26.08	5		rs13476309	1	194.05	16.08	9.86	5.53	10.83	0	0
ILMN_1243150	Traf3ip3	1	195	rs3654502	1	194.58	Y	Y	1.84	11.71	30.08	10.46	4		rs3706842	1	194.83	4.62	3.73	0.1	2.56	0	0
ILMN_2668260	Kcnh1	1	194.33	rs13476313	1	195.86	Y	Y	7.25	41.58	36.6	12.7	9		rs13476311	1	195.61	90.73	59.88	60.41	178.18	1	0
ILMN_3163053	Commd3	2	18.6	rs13476358	2	16.22	Y	Y	32.36	51.03	24.25	33.79	13		rs3688854	2	20.2	0.65	0.42	0	3.66	0	0
ILMN_1220782	Dnajc1	2	18.29	rs13476358	2	16.22	Y	Y	37.41	36.3	18.02	30.14	13		rs3688854	2	20.2	0.69	2.31	0.21	0.61	0	0
ILMN_2717439	Pip5k2a	2	18.76	rs13476358	2	16.22	Y	Y	25.02	42.17	33.7	32.62	15		rs3688854	2	20.2	0.08	0.12	0.07	1.18	0	0
ILMN_1244653	Etl4	2	20.72	rs13476364	2	19	Y	Y	31.03	61.32	38.59	54.01	1		rs3688854	2	20.2	0.64	0.14	0.73	1.7	0	0
ILMN_1223457	Etl4	2	20.68	rs13476364	2	19	Y	Y	30.67	45	24.21	30.6	13		rs3688854	2	20.2	1.21	1	1.15	1.28	0	0
ILMN_1216601	4933434I06Rik	2	21.1	rs13476364	2	19	Y	Y	20.73	43.82	36.15	26.04	15		rs3688854	2	20.2	0.72	0.27	1.57	1.28	0	0
ILMN_1237670	Entpd2	2	25.26	CEL-2_24053663	2	23.92	Y	Y	38.68	49.06	45.82	47.17	1		rs6286688	2	24.39	0.12	0	0.06	0.37	0	0
ILMN_1249937	Mrpl41	2	25.62	CEL-2_24053663	2	23.92	Y	Y	30.27	46.64	44.1	39.59	1		rs6286688	2	24.39	2.71	0.38	0.04	0.56	0	0
ILMN_2467800	Uap1l1	2	25.22	CEL-2_24053663	2	23.92	Y	Y	15.68	34.74	28.83	32.92	15		rs6286688	2	24.39	3.44	0.2	0.19	1.45	0	0
ILMN_3163288	Egfl7	2	26.45	rs13476390	2	25.69	Y	Y	21.81	27.11	10.69	25.82	3		UT_2_26.61523	2	26.2	0.45	1.58	0.02	3.13	0	0
ILMN_1254328	C030048H21Rik	2	26.1	rs13476390	2	25.69	Y	Y	13.67	32.15	28.92	24.8	9		UT_2_26.61523	2	26.2	0.03	0.02	0.71	5.83	0	0
ILMN_1253947	Traf1	2	34.8	rs13476427	2	34.84	Y	Y	10.41	29.14	16	37.52	10		rs13476427	2	34.87	34.81	42.08	36.16	39.81	1	0
ILMN_1224579	Lrp1b	2	41.35	rs3709811	2	37.48	Y	Y	21.53	40.32	14.57	29.87	10		rs13476427	2	34.87	1.64	0.13	0.25	0.42	0	0
ILMN_2525819	Zbtb6	2	37.29	rs3709811	2	37.48	Y	Y	10.99	24.61	28.18	27.18	11		rs13476427	2	34.87	0.02	5.03	0	0.02	0	0
ILMN_1248439	St6galnac4	2	32.46	rs6288325	2	42.71	Y	N	4.81	32.26	6.97	28	10		rs6288325	2	42.74	0.37	0.48	0.93	0	0	0
ILMN_1229830	Zeb2	2	44.88	mCV22297233	2	44.41	Y	Y	28.57	22.42	13.61	12.74	2		rs13476464	2	43.54	5.55	1.49	4.57	8.17	0	0
ILMN_2451506	Scn3a	2	65.3	rs6302554	2	64.66	Y	Y	21.65	54.29	23.45	22.42	3		rs13476547	2	65.38	0	0.04	0.21	0.12	0	0
ILMN_2646322	Samsn1	16	75.86	rs6302554	2	64.66	N	N	14.71	27.35	17.87	20.96	3		rs13476547	2	65.38	3.17	0.12	0	0.52	0	0
ILMN_3163340	Rbm45	2	76.22	rs3713848	2	75.82	Y	Y	33.12	57.02	36.15	55.5	1		rs3713848	2	75.86	48.8	80.08	52.52	74.28	1	1
ILMN_1216435	A130060I20Rik	13	52.39	CEL-2_79237503	2	79.14	N	N	10.73	26.84	17.28	38.26	10		CEL-2_79237503	2	79.18	10.45	15.8	13.49	20.25	0	0
ILMN_2601155	Frzb	2	80.25	rs3722345	2	80.42	Y	Y	37.77	48.65	43.45	60.73	1		rs3722345	2	80.46	67.38	65.82	70.91	77.06	1	1
ILMN_2735575	Ddb2	2	91.05	rs3722345	2	80.42	Y	N	12.13	15.54	14.63	28.85	5		rs3722345	2	80.46	3.49	0.85	0.36	1.13	0	0
ILMN_1229140	Slc39a13	2	90.76	rs13476609	2	83.05	Y	N	41.17	48.47	30.45	39.31	1		rs3722345	2	80.46	6.21	2.93	3.24	0.07	0	0
ILMN_2501455	9630056G07Rik	2	103.99	D2Mit12	2	102.9	Y	Y	58.94	71.44	51.7	47.12	1		rs13476673	2	103.07	69.67	61.97	67.13	59.59	1	1
ILMN_1234424	D430041D05Rik	2	103.99	D2Mit12	2	102.9	Y	Y	19.17	38.06	16.62	22.24	3		rs13476673	2	103.07	29.99	32.88	34.9	30.59	1	0
ILMN_2642339	Slc1a2	2	102.62	D2Mit12	2	102.9	Y	Y	13.91	27.92	19.42	4.99	3		rs13476673	2	103.07	3.45	0.57	0	0.59	0	0
ILMN_2592953	Scg5	2	113.62	CEL-2_113459249	2	113.37	Y	Y	37.09	37.67	25.23	26.45	13		rs13476708	2	113.59	0.48	3.35	0.41	0.1	0	0
ILMN_1246905	Rasgrp1	2	117.11	rs13476723	2	116.98	Y	Y	20.82	35.98	19.87	21.67	3		rs13476723	2	117.12	0.19	0.38	6.25	0.01	0	0
ILMN_1257622	D2Ertd435e	2	121.02	UT_2_119.151187	2	118.57	Y	Y	37.11	63.56	28.9	36.92	1		rs13476729	2	119.04	0.78	0.26	0.02	0.92	0	0
ILMN_1222902	Cdan1	2	120.54	UT_2_119.151187	2	118.57	Y	Y	13.17	28.79	7.39	9.93	3		rs13476729	2	119.04	4.14	7.17	0.02	1.68	0	0
ILMN_1241503	Ell3	2	121.28	UT_2_119.151187	2	118.57	Y	Y	13.07	27.64	18.6	20.08	3		rs13476729	2	119.04	0.06	0.69	0.19	0.7	0	0
ILMN_1222754	Rpap1	2	119.6	UT_2_119.151187	2	118.57	Y	Y	15.7	27.22	8.98	17.85	3		rs13476729	2	119.04	3.71	12.79	10.32	22.73	0	0
ILMN_1255775	Adra1d	2	131.39	UT_2_119.151187	2	118.57	Y	N	0.14	33.93	10.84	2.88	3		rs13476729	2	119.04	1.03	0.04	0.14	0.18	0	0
ILMN_1245115	Fahd2a	2	127.27	UT_2_119.151187	2	118.57	Y	N	7.35	2.2	9.14	27.86	5		rs13476729	2	119.04	4.78	0.11	0.23	2.03	0	0
ILMN_2681622	Nit2	16	57.16	UT_2_119.151187	2	118.57	N	N	0.22	1.45	0.03	28.55	5		rs13476729	2	119.04	2.96	0.4	0.53	2.47	0	0
ILMN_1237186	Spint1	2	119.08	UT_2_119.151187	2	118.57	Y	Y	30.09	18.95	28.88	18.98	7		rs13476729	2	119.04	0.09	1.99	0.13	1.77	0	0
ILMN_1238065	Rpap1	2	119.6	UT_2_119.151187	2	118.57	Y	Y	16.97	44.57	13.26	37.33	10		rs13476729	2	119.04	12.79	11.82	9.24	26.21	5	0
ILMN_1216575	Ctdspl2	2	121.82	rs13476740	2	121.28	Y	Y	62.76	51.24	48.08	63.1	1		gnf02.119.284	2	120.96	0.28	2.91	0.11	0.14	0	0
ILMN_1231682	Zc3h6	2	128.79	rs13476740	2	121.28	Y	N	18.35	28.27	17.41	10.18	3		gnf02.119.284	2	120.96	0.14	0	0.1	0.73	0	0
ILMN_1219860	Ltk	2	119.58	rs13476740	2	121.28	Y	Y	6.31	14.75	7.76	31.73	5		gnf02.119.284	2	120.96	0.04	1.67	5.22	3.1	0	0
ILMN_2648445	Slc27a2	2	126.41	rs6374387	2	125.17	Y	Y	65.62	81.76	43.25	54.75	1		rs13476756	2	124.82	0.03	0.17	0.07	6.14	0	0
ILMN_2676066	Stard7	2	127.12	rs6374387	2	125.17	Y	Y	66.6	76.95	47.64	50.66	1		rs13476756	2	124.82	2.69	0.01	4.74	6.93	0	0
ILMN_1252689	Sppl2a	2	126.73	rs6374387	2	125.17	Y	Y	46.18	59.41	30.87	48.38	1		rs13476756	2	124.82	0.1	0.03	3.88	0.54	0	0
ILMN_1229797	Gabpb1	2	126.5	rs6374387	2	125.17	Y	Y	45.66	54.15	46.34	58.17	1		rs13476756	2	124.82	0.65	0.04	0.29	1.92	0	0
ILMN_2563813	Slc20a1	2	129.03	rs6411422	2	128.06	Y	Y	61.49	73.35	43.12	51.67	1		rs6411422	2	128.2	9.15	10.3	9.24	4.93	0	0
ILMN_1223159	Tmem87a	2	120.18	rs6411422	2	128.06	Y	N	15.59	37.2	0.91	12.71	3		rs6411422	2	128.2	0.24	0.14	0.37	0.06	0	0
ILMN_1214593	Fahd2a	2	127.27	rs6411422	2	128.06	Y	Y	18.94	26.69	18.68	26.31	10		rs6411422	2	128.2	2.62	0	0	1.43	0	0
ILMN_2515273	Slc27a2	2	126.41	rs8264884	2	130.75	Y	Y	38.13	37.33	47.51	58.7	1		rs13476774	2	131.24	3.59	1.64	1.42	0.59	0	0
ILMN_1246870	Spata5l1	2	122.46	rs8264884	2	130.75	Y	N	13.84	29.82	17.82	13.17	3		rs13476774	2	131.24	1.02	1.48	0.48	0.4	0	0
ILMN_1245093	Nphp1	2	127.57	rs8264884	2	130.75	Y	Y	7.69	15.93	11.77	27.31	5		rs13476774	2	131.24	2.26	0.02	10.05	0.38	0	0
ILMN_1230440	1700041B20Rik	2	126.96	rs8264884	2	130.75	Y	Y	16.27	28.52	7.21	29.83	10		rs13476774	2	131.24	1.06	0.56	1.09	8.94	0	0
ILMN_2578154	Stard7	2	127.1	rs8264884	2	130.75	Y	Y	25.75	29.24	25.65	29.37	10		rs13476774	2	131.24	2.31	1.61	4.45	1.17	0	0
ILMN_1232487	B230310H07Rik	2	140.66	rs13476805	2	139.42	Y	Y	45.84	58.54	37.82	52.9	1		rs13476802	2	138.6	74.42	65.61	55.46	67.9	1	1
ILMN_2641857	Polr3f	2	144.36	rs13476805	2	139.42	Y	Y	30.76	17.51	22.32	19.06	2		rs13476802	2	138.6	37.16	33	22.24	48.01	13	0
ILMN_2758803	1700019G17Rik	6	85.85	rs13476805	2	139.42	N	N	26.08	12.97	10	15.13	2		rs13476802	2	138.6	0	0.05	0.9	0.09	0	0
ILMN_1219601	Tasp1	2	139.8	rs13476805	2	139.42	Y	Y	25.66	34.31	12.77	17.27	3		rs13476802	2	138.6	70.78	70.95	73.36	57.52	1	0
ILMN_1221330	Csrp2bp	2	144.22	rs13476805	2	139.42	Y	Y	12.39	32.81	17.7	20.82	3		rs13476802	2	138.6	63.55	45.5	26.68	35.05	1	0
ILMN_1260291	Rrbp1	2	142.52	rs13476805	2	139.42	Y	Y	17.49	27.29	23.31	27.55	10		rs13476802	2	138.6	63.98	61.96	36.3	42.6	1	0
ILMN_1216813	2310003L22Rik	2	140.03	rs13476805	2	139.42	Y	Y	29.34	32.96	25.63	41.35	13		rs13476802	2	138.6	58.64	89.1	55.42	68.3	1	0
ILMN_1231138	E2f1	2	154.39	rs6291774	2	154.24	Y	Y	38.8	32.1	26.6	32.8	1		rs13476872	2	159.12	2.38	0.06	0	0.89	0	0
ILMN_2604985	Cdk5rap1	2	154.2	rs6291774	2	154.24	Y	Y	26.7	34.3	27.75	28.24	1		rs13476872	2	159.12	0.02	1.31	3.16	0.01	0	0
ILMN_1255148	H13	2	152.51	rs6291774	2	154.24	Y	Y	23.26	24.49	16.71	35.35	5		rs13476872	2	159.12	1.4	0.01	3	0.98	0	0
ILMN_2495051	4930518I15Rik	2	156.68	rs6265656	2	156.56	Y	Y	62.28	63.39	52.91	51.52	1		rs13476872	2	159.12	0.56	0.07	1.56	0.3	0	0
ILMN_2627140	9830001H06Rik	2	156.84	rs6265656	2	156.56	Y	Y	41.11	46.69	44.59	29.83	1		rs13476872	2	159.12	0	0.2	4.36	1.49	0	0
ILMN_2600104	Hif1an	19	44.64	rs6265656	2	156.56	N	N	37.79	18.56	25.51	11.89	2		rs13476872	2	159.12	0	7.79	2.01	0.29	0	0
ILMN_1253853	Ghrh	2	157.16	rs6265656	2	156.56	Y	Y	17.58	31.12	11.06	16.04	3		rs13476872	2	159.12	3.29	1.62	0.56	3.63	0	0
ILMN_1234039	Slc32a1	2	158.44	rs3691210	2	157.69	Y	Y	44.1	38.1	32.44	37.81	1		rs13476872	2	159.12	0.04	0.21	0.2	0.72	0	0
ILMN_1240603	Kif3b	2	153.15	rs3691210	2	157.69	Y	Y	35.83	2.88	7.83	9.13	2		rs13476872	2	159.12	0.27	0.1	2.11	0.56	0	0
ILMN_1245413	B230339M05Rik	2	158.25	rs3691210	2	157.69	Y	Y	15.69	40.99	19.95	28.87	10		rs13476872	2	159.12	0	0.28	12.31	4.4	0	0
ILMN_1229131	Wfdc3	2	164.56	rs3671849	2	162.84	Y	Y	30.64	43.29	14.49	33.99	13		rs3671849	2	162.98	58.54	53.62	49.52	44.07	1	0
ILMN_1227948	Pigt	2	164.33	rs13476889	2	164	Y	Y	29.64	46.79	35.33	37.46	1		rs13476887	2	163.65	51.72	66.79	50.95	52.86	1	1
ILMN_2674425	Sys1	2	164.29	rs13476889	2	164	Y	Y	15.42	46.61	32.14	17.73	9		rs13476887	2	163.65	101.02	104.73	75.28	89.67	1	0
ILMN_2497853	1110018N20Rik	2	167.02	rs6219107	2	167.17	Y	Y	16.37	40.02	19.27	15.8	3		rs6219107	2	167.3	51.49	49.6	49.26	58.96	1	0
ILMN_2595478	Sall4	2	168.58	CEL-2_168586738	2	168.21	Y	Y	5.56	30.05	11.33	18.71	3		rs6160839	2	168.79	4.04	1.59	1.49	0.22	0	0
ILMN_1249526	Bmp7	2	172.74	rs13476914	2	170.52	Y	Y	7.04	13.85	12.83	27.31	5		rs3689258	2	169.31	1.26	0.55	0.18	1.48	0	0
ILMN_2683374	Asna1	8	87.54	rs13476936	2	179.14	N	N	28.57	0.01	1.64	0.13	2		rs13476944	2	180.66	4.63	0.01	0.15	0.67	0	0
ILMN_2621433	Fgfrl1	5	109.14	rs13476936	2	179.14	N	N	27.56	1.94	0.15	0.27	2		rs13476944	2	180.66	2.45	1.96	0.72	11.43	0	0
ILMN_2622735	Rnf40	7	134.75	rs13476936	2	179.14	N	N	26.91	0.04	1.22	0.18	2		rs13476944	2	180.66	0.16	0.8	0	1.93	0	0
ILMN_2746456	Tcirg1	19	3.9	rs13476942	2	180.62	N	N	26.88	0.46	0.04	1.84	2		rs13476944	2	180.66	0.05	8.25	1.64	2.11	0	0
ILMN_2619179	Zbtb46	2	181.15	rs6305540	2	181.02	Y	Y	32.32	43.77	30.39	35.88	1		rs13476944	2	180.66	39.26	56.12	43.75	54.26	1	1
ILMN_1241017	Kcnq2	2	180.84	rs6305540	2	181.02	Y	Y	44.94	72.68	54.13	49.56	1		rs13476944	2	180.66	62.8	70.33	75.63	59.65	1	1
ILMN_2742576	Chrna4	2	180.76	rs6305540	2	181.02	Y	Y	33.82	13.58	4.79	19.33	2		rs13476944	2	180.66	31.92	49.09	44.8	28.31	1	0
ILMN_2547571	2700038C09Rik	2		rs6305540	2	181.02	Y	Y	24.93	33.39	24.05	21.66	3		rs13476944	2	180.66	51.63	45.13	54.21	43.06	1	0
ILMN_2641946	Rtel1	2	181.09	rs6305540	2	181.02	Y	Y	44.33	49.39	20.26	31.95	13		rs13476944	2	180.66	59.63	72.63	63.32	49.73	1	0
ILMN_2777609	Tcea2	2	181.42	rs6305540	2	181.02	Y	Y	13.77	35.21	30.21	27.17	15		rs13476944	2	180.66	45.26	34	41.01	38.86	1	0
ILMN_2719361	Slc7a14	3	31.11	rs6260196	3	28.92	Y	Y	70.81	72.44	74.56	53.43	1		rs13459183	3	28.54	0.45	0.93	0.7	0.01	0	0
ILMN_2679229	Slc7a14	3	31.11	rs6260196	3	28.92	Y	Y	41.04	48.75	53.31	31.72	1		rs13459183	3	28.54	0.28	1.95	0.27	0.03	0	0
ILMN_2726905	Gnb4	3	32.48	rs6260196	3	28.92	Y	Y	45.81	53.02	26.16	22.79	12		rs13459183	3	28.54	19.51	25.89	19.06	19.58	3	0
ILMN_1243645	LOC386537	3	37.22	rs3151902	3	36.8	Y	Y	33.78	39.76	40.6	40.97	1		rs13477062	3	36.74	14.69	11.07	13.18	19.29	0	0
ILMN_1242238	Cetn4	3	20.97	rs3151902	3	36.8	Y	Y	28.65	25.41	21.25	24.88	2		rs13477062	3	36.74	18.51	27.37	30.48	41.66	15	0
ILMN_1221371	4932438A13Rik	3	36.79	rs3151902	3	36.8	Y	Y	18.43	31.5	18.92	19.19	3		rs13477062	3	36.74	23.3	17.21	25.09	27.94	11	0
ILMN_2656511	Bbs7	3	36.47	rs3151902	3	36.8	Y	Y	14.89	59.22	4.78	21.88	3		rs13477062	3	36.74	35.99	33.42	37.65	33.89	1	0
ILMN_2771836	Spata5	3	37.32	rs3151902	3	36.8	Y	Y	24.21	28.13	23.16	14.21	3		rs13477062	3	36.74	15.23	6.68	10.61	15.99	0	0
ILMN_2463432	Slc7a11	3	50.18	mCV24401139	3	46.27	Y	Y	29.25	30.6	25.31	27.96	13		mCV24401139	3	45.97	52.25	68.04	43.11	54.7	1	0
ILMN_1241369	Gpr149	3	62.33	rs6363066	3	57.91	Y	Y	25.25	25.27	22.03	26.7	5		rs3680871	3	59.05	89.63	74.06	91.09	69.87	1	0
ILMN_2630512	Rsrc1	3	67.16	rs3674751	3	65.76	Y	Y	8.33	18.51	14.06	31.23	5		rs3674751	3	65.47	41.53	49.71	60.71	44.55	1	0
ILMN_3161679	Serpini1	3	75.45	CEL-3_75140206	3	74.82	Y	Y	81.83	76.61	58.62	77.75	1		rs13477201	3	75.26	5.24	16.26	0.31	5.35	0	0
ILMN_2722542	Dap3	3	88.73	CEL-3_75140206	3	74.82	Y	N	37.76	17.36	16.96	9.71	2		rs13477201	3	75.26	3.29	0.67	0.22	1.6	0	0
ILMN_2620078	Dap3	3	88.73	CEL-3_75140206	3	74.82	Y	N	33.91	19.58	13.59	12.85	2		rs13477201	3	75.26	3.01	2.27	0.03	1.51	0	0
ILMN_2646230	Dap3	3	88.74	CEL-3_75140206	3	74.82	Y	N	28.02	13.2	6.94	14.36	2		rs13477201	3	75.26	0.19	0.01	0.29	0.6	0	0
ILMN_1235811	1110032E23Rik	3	79.75	rs13477204	3	76.15	Y	Y	31.39	50.44	39.64	44.07	1		rs13477204	3	75.87	57.33	47.82	51.14	51.86	1	1
ILMN_1258076	Etv3	3	87.34	rs13477204	3	76.15	Y	N	11.56	34.87	3.76	5.7	3		rs13477204	3	75.87	0.59	1.92	2.96	2.76	0	0
ILMN_1241211	Gucy1a3	3	81.9	rs13477204	3	76.15	Y	N	27.63	28.23	12.01	12.85	6		rs13477204	3	75.87	1.12	3.64	3.32	1.84	0	0
ILMN_1228862	Ctso	3	81.73	rs13477204	3	76.15	Y	N	26.67	24.87	18.67	26.7	8		rs13477204	3	75.87	0.34	0.28	0.13	0.71	0	0
ILMN_2441625	1110032E23Rik	3	79.75	rs3685286	3	81.58	Y	Y	6.35	32.13	8.31	4.34	3		gnf03.079.138	3	81.92	30.65	68.11	23.86	40.31	13	0
ILMN_2690540	Fstl5	3	76.51	rs3685286	3	81.58	Y	N	20.49	30.86	15.6	10.33	3		gnf03.079.138	3	81.92	2.49	6.59	7.38	0.36	0	0
ILMN_2497745	Mtap9	3	82.2	rs3699123	3	82.48	Y	Y	38.92	37.33	36.68	64.63	1		gnf03.079.138	3	81.92	0.15	0.11	0.03	1.77	0	0
ILMN_2438793	Tmod4	3	94.93	rs3699123	3	82.48	Y	N	0.18	10.36	28.89	6.12	4		gnf03.079.138	3	81.92	12.1	17.14	8.33	9.37	0	0
ILMN_1259901	Them4	3	94.13	rs3698196	3	86.21	Y	N	28.49	48.09	29.15	31.45	1		UT_3_90.000791	3	87.72	51	53.51	60.08	48.31	1	1
ILMN_2488846	Tmod4	3	94.93	rs3698196	3	86.21	Y	N	30.9	35.46	33.26	46.17	1		UT_3_90.000791	3	87.72	46.9	56.4	35.46	43.87	1	1
ILMN_1243996	Ash1l	3	88.79	rs3698196	3	86.21	Y	Y	13.59	33.9	20.76	9.78	3		UT_3_90.000791	3	87.72	0.54	0.08	4.76	1.73	0	0
ILMN_2614110	5830417I10Rik	3	88.7	rs3698196	3	86.21	Y	Y	14.37	34.25	18.19	18.74	3		UT_3_90.000791	3	87.72	11.76	1.69	5.07	4.48	0	0
ILMN_1231819	Lrba	3	86.09	rs3698196	3	86.21	Y	Y	22.77	29.53	16.67	21.72	3		UT_3_90.000791	3	87.72	3.7	0.47	0.1	0.15	0	0
ILMN_2646230	Dap3	3	88.74	rs3698196	3	86.21	Y	Y	18.32	31.95	24.92	28.41	10		UT_3_90.000791	3	87.72	0.25	3.68	0	0.07	0	0
ILMN_1230688	Ilf2	3	90.29	rs3698196	3	86.21	Y	Y	14.01	46.18	40.79	36.57	15		UT_3_90.000791	3	87.72	0.04	0.02	0.19	0.06	0	0
ILMN_1251524	Them4	3	94.14	UT_3_90.000791	3	88	Y	N	14.81	47.33	36.62	38.2	15		UT_3_90.000791	3	87.72	55.24	57.06	49.57	57.7	1	0
ILMN_2722542	Dap3	3	88.73	UT_3_90.000791	3	88	Y	Y	24.67	42.61	51.64	47.81	15		UT_3_90.000791	3	87.72	4.71	4.16	2.99	6.73	0	0
ILMN_2620078	Dap3	3	88.73	UT_3_90.000791	3	88	Y	Y	19.33	42.88	45.42	46.61	15		UT_3_90.000791	3	87.72	4.42	8.25	6.98	7.08	0	0
ILMN_2474011	Nxn	11	76.07	rs13477308	3	105.24	N	N	28.28	7.26	3.9	0.08	2		rs13477308	3	104.92	3.57	0.97	0.53	0.96	0	0
ILMN_1239174	Glod4	11	76.06	rs3702359	3	107.26	N	N	27.09	15.83	11.66	12.81	2		rs13477316	3	106.98	0.16	0.33	0.88	0.23	0	0
ILMN_1252005	Dph5	3	115.6	mCV25436350	3	113.19	Y	Y	11.24	39.99	25.15	21.94	3		rs3698700	3	112.04	35.47	41.72	50.47	23.48	12	0
ILMN_1233693	Slc30a7	3	115.65	mCV25436350	3	113.19	Y	Y	13.74	26.39	19.2	16.27	3		rs3698700	3	112.04	24.49	43.94	43.67	26.74	1	0
ILMN_1250135	A930005H10Rik	3	115.59	mCV25436350	3	113.19	Y	Y	17.7	22.69	5.31	28.04	5		rs3698700	3	112.04	50.33	60.22	52.39	54.06	1	0
ILMN_1247096	Agl	3	116.45	mCV25436350	3	113.19	Y	Y	15.32	22.24	15.31	26.01	5		rs3698700	3	112.04	17.83	23.76	20.07	14.4	0	0
ILMN_1242012	Dbt	3	116.24	mCV25436350	3	113.19	Y	Y	14.08	26.85	8.23	27.37	10		rs3698700	3	112.04	0.17	10.85	13.36	6.01	0	0
ILMN_2605575	Alg14	3	121.06	rs6200560	3	122.09	Y	Y	26.17	17.27	10.28	28.41	8		rs6200560	3	121.8	34.25	37.14	54.08	53.11	1	0
ILMN_1236100	Rwdd3	3	120.87	rs6200560	3	122.09	Y	Y	34.55	40.77	24.57	43.56	13		rs6200560	3	121.8	29.96	36.85	32.01	36.69	1	0
ILMN_1237725	Arsj	3	126.14	rs3691246	3	122.47	Y	Y	52.9	57.45	35.27	35.74	1		rs6200560	3	121.8	75.13	78.41	63.58	61.45	1	1
ILMN_1239797	Pde5a	3	122.48	rs3691246	3	122.47	Y	Y	33.91	50.74	33.75	29.75	1		rs6200560	3	121.8	73.34	73.1	90.8	43.5	1	1
ILMN_1215398	Usp53	3	122.66	rs3691246	3	122.47	Y	Y	10.07	29.23	11.73	17.54	3		rs6200560	3	121.8	6.35	17.36	12.18	18.46	0	0
ILMN_1238832	G430022H21Rik	3	123.08	rs3691246	3	122.47	Y	Y	5.98	28.52	29.76	4.32	9		rs6200560	3	121.8	18.54	16.46	33.87	14.83	4	0
ILMN_1234857	Myoz2	3	122.71	rs3691246	3	122.47	Y	Y	32.57	50.84	24.36	43.73	13		rs6200560	3	121.8	65.15	71.25	75.27	53.24	1	0
ILMN_1229990	Agxt2l1	3	130.34	rs4221957	3	129.82	Y	Y	25.56	48.17	32.17	31.12	15		rs4221957	3	129.53	25.87	23.28	37.88	19.13	7	0
ILMN_1228033	Gstcd	3	132.65	rs13477412	3	132.63	Y	Y	11.61	24.49	27.34	20.45	4		rs13477412	3	132.35	33.44	58.2	43.14	40.95	1	0
ILMN_1225187	H2afz	3	137.53	UT_3_141.310761	3	137.33	Y	Y	25.59	45.31	20.15	22.52	3		rs13477438	3	137.47	3.94	1.49	0.56	0	0	0
ILMN_1243565	Manba	3	135.23	UT_3_141.310761	3	137.33	Y	Y	19.86	28.48	24.27	31.36	10		rs13477438	3	137.47	5.39	8.49	7.62	14.45	0	0
ILMN_2628594	Mttp	3	137.75	UT_3_141.310761	3	137.33	Y	Y	16.61	35.52	26.88	38.95	15		rs13477438	3	137.47	20.14	30.31	28.66	24.17	15	15
ILMN_2419480	Unc5c	3	141.16	rs4138815	3	140.37	Y	Y	11.54	29.27	12.5	5.57	3		rs13477451	3	140.38	40.44	30.95	49.59	36.38	1	0
ILMN_1216262	Bmpr1b	3	141.5	rs3090379	3	141.98	Y	Y	25.61	33.68	12.47	19.5	3		rs13477456	3	141.91	55.58	52.69	50.34	45.31	1	0
ILMN_1241870	Pkn2	3	142.49	rs3090379	3	141.98	Y	Y	25.77	36.88	27.43	42.43	15		rs13477456	3	141.91	46.57	47.19	47.94	57.47	1	0
ILMN_2660851	Bcl10	3	145.6	UT_3_150.551162	3	146.57	Y	Y	38.89	30.13	39.88	24.38	12		rs3688583	3	146.3	49.89	52.46	51.92	49.09	1	0
ILMN_1224540	Eltd1	3	151.21	rs3724562	3	151.27	Y	Y	21.75	25.98	28.12	18.02	4		rs3724562	3	151	45.79	62.99	46.51	49.47	1	0
ILMN_2602257	Tmem68	4	3.48	rs13477532	4	3.63	Y	Y	22.05	43.82	19.07	20.35	3		gnf04.002.599	4	5.61	0.84	2.05	0.9	0	0	0
ILMN_1236308	LTR_LOC268730	4		rs13477601	4	22.33	Y	Y	8.11	23.75	30.31	24.05	4		rs13477611	4	24.52	0.07	0	2.22	3.07	0	0
ILMN_1231706	4930528A17Rik	4	21.77	rs13477601	4	22.33	Y	Y	17.54	22.34	10.87	28.53	5		rs13477611	4	24.52	0.68	0.9	0.84	0.34	0	0
ILMN_1238820	LOC332788	13	42.08	rs13477601	4	22.33	N	N	16.45	37.6	30.86	19.72	9		rs13477611	4	24.52	0.03	0.58	0.01	2.64	0	0
ILMN_1221526	D130052N13Rik	4	42.8	rs13477670	4	42.81	Y	Y	45.05	47.36	41.32	42	1		rs3698283	4	43.2	15.16	28.06	23.65	24.28	10	0
ILMN_1214953	Rusc2	4	43.44	rs13477670	4	42.81	Y	Y	38.67	80.5	44.07	66.69	1		rs3698283	4	43.2	0.14	0	0.01	1.82	0	0
ILMN_1255032	Cntfr	4	41.63	rs13477670	4	42.81	Y	Y	34.93	73.17	37.54	46.04	1		rs3698283	4	43.2	6.73	8.39	0.34	2.11	0	0
ILMN_1213286	Ccl21b	4	42.79	rs13477670	4	42.81	Y	Y	32.59	50.29	41.3	38.77	1		rs3698283	4	43.2	0.89	0.88	1.79	0.12	0	0
ILMN_1224938	C230001G04Rik	4	42.8	rs13477670	4	42.81	Y	Y	38.57	49.26	34.88	45.47	1		rs3698283	4	43.2	0.32	9.44	0.21	17.78	0	0
ILMN_2602139	Ccl21a	4	42.63	rs13477670	4	42.81	Y	Y	34.85	47.53	42.72	39.24	1		rs3698283	4	43.2	2.07	1.19	0.95	1.59	0	0
ILMN_1258097	LOC277506	4	42.1	rs13477670	4	42.81	Y	Y	42.24	30.05	39.26	32.99	1		rs3698283	4	43.2	1.74	0.38	0.57	0.32	0	0
ILMN_1226622	D430042O12Rik	4	42.6	rs13477670	4	42.81	Y	Y	26.77	37.3	37.74	22.81	12		rs3698283	4	43.2	4.42	0.02	5.12	2.07	0	0
ILMN_1244845	Narf	11	121.12	rs3694836	4	45.99	N	N	26.35	0.55	0.04	0.02	2		rs3694836	4	45.99	0.17	0.01	0.88	0	0	0
ILMN_1223695	5830415F09Rik	4	46.39	rs3694836	4	45.99	Y	Y	23.99	39.96	33.85	30.6	15		rs3694836	4	45.99	75.66	65.86	66.24	56.79	1	0
ILMN_1252308	Rnf20	4	49.67	rs13477713	4	54.38	Y	Y	7.42	26.4	8.94	26.95	10		rs3677601	4	50	1	0.26	1.14	0.21	0	0
ILMN_1256691	Ikbkap	4	56.78	rs6239799	4	56.59	Y	Y	25.77	74.04	48.58	59.18	15		rs3677601	4	50	0.58	0.24	1.42	3.81	0	0
ILMN_1259711	AI314180	4	58.84	UT_4_58.126445	4	58.47	Y	Y	19.7	19.88	15.98	29.9	5		rs3677601	4	50	0	0.05	0.01	1.25	0	0
ILMN_2655015	Alad	4	62.17	rs13477735	4	61.34	Y	Y	28.55	61.81	28.82	40.95	1		rs6370644	4	70.2	0.22	1.12	0.05	2.28	0	0
ILMN_2608145	Hdhd3	4	62.16	rs13477735	4	61.34	Y	Y	41.4	45.11	29.41	45.88	1		rs6370644	4	70.2	0.39	0.39	0.1	2.13	0	0
ILMN_2705578	Snx30	4	59.91	rs13477735	4	61.34	Y	Y	3.86	37.53	9.53	7.91	3		rs6370644	4	70.2	0.48	0.11	1.19	2.06	0	0
ILMN_1244790	Erbb2ip	13	104.61	rs3690581	4	62.19	N	N	0.56	0.3	1.39	30.83	5		rs6370644	4	70.2	1.37	0.23	0.01	0.11	0	0
ILMN_1252185	Rbp4	19	38.19	rs3690581	4	62.19	N	N	0.44	0.02	0.14	29.43	5		rs6370644	4	70.2	2.32	2.62	0.05	0.38	0	0
ILMN_2703204	2310061C15Rik	8	119.41	rs3690581	4	62.19	N	N	1.41	0.59	0.01	28.14	5		rs6370644	4	70.2	0.09	4.53	0.54	0.74	0	0
ILMN_2684413	3230401D17Rik	2	163.23	rs3690581	4	62.19	N	N	0.54	0.01	0.08	27.35	5		rs6370644	4	70.2	0.04	1.18	0.9	0.1	0	0
ILMN_1257503	Tm9sf2	14	122.56	rs3690581	4	62.19	N	N	0.09	0.54	0.12	26.64	5		rs6370644	4	70.2	0.93	0.13	0.03	1.31	0	0
ILMN_2481902	Plxnc1	10	94.25	rs3690581	4	62.19	N	N	0	0.85	0.37	26.44	5		rs6370644	4	70.2	0.08	1.19	0.23	1.38	0	0
ILMN_2728465	Sstr1	12	59.31	rs6254381	4	63.17	N	N	8.63	2.78	4.79	30.01	5		rs6370644	4	70.2	4.42	5.91	2.36	6.81	0	0
ILMN_2602128	Snx3	10	42.25	rs6254381	4	63.17	N	N	0.6	0.29	0.2	28.34	5		rs6370644	4	70.2	0.87	0.01	1.18	1.75	0	0
ILMN_2625736	B130006D01Rik	11	95.59	rs3023981	4	69.59	N	N	11.49	9.07	13.47	29.49	5		rs6370644	4	70.2	0.89	0.16	1.5	0.26	0	0
ILMN_1254344	Wars2	3	99.04	rs6222684	4	71.63	N	N	28.52	0	5.51	0.19	2		rs13477765	4	70.89	2.08	1.15	1.3	0.01	0	0
ILMN_1258833	4930473A06Rik	4	83.17	rs6258088	4	82.09	Y	Y	26.36	23.24	8.19	20.59	2		rs3674783	4	83.45	0.32	0.24	0.98	0.28	0	0
ILMN_1219928	A930009N24	4	85.43	rs6258088	4	82.09	Y	Y	50.35	33.14	20.47	43.63	13		rs3674783	4	83.45	0.03	0.74	0.01	0.08	0	0
ILMN_1244451	4930473A06Rik	4	83.17	rs6258088	4	82.09	Y	Y	45.41	30.5	19.12	31.32	13		rs3674783	4	83.45	0.26	2.79	0.04	0.52	0	0
ILMN_2629112	Asah3l	4	86.57	rs13477820	4	86	Y	Y	34.11	21.32	11.81	18.6	2		CEL-4_86326428	4	87.7	1.35	0.17	1.38	2.89	0	0
ILMN_1237921	Slc24a2	4	86.64	rs13477820	4	86	Y	Y	5.3	26.66	19.41	7.29	3		CEL-4_86326428	4	87.7	2.49	0.58	0.01	1.84	0	0
ILMN_1227240	Cdkn2b	4	88.95	rs3022987	4	88.06	Y	Y	63	62.97	21.59	35.78	13		rs13477831	4	88.6	0.09	0.09	3.92	3.67	0	0
ILMN_1247919	2210012G02Rik	4	106.81	rs13477919	4	104.79	Y	Y	44.64	58.26	57.71	45.15	1		rs13477886	4	104.38	113.72	116.01	100.02	90.05	1	1
ILMN_1226642	2210012G02Rik	4	106.84	rs13477919	4	104.79	Y	Y	24.73	41.24	31.5	26.54	15		rs13477886	4	104.38	43.81	39.51	36.54	35.89	1	0
ILMN_1248467	Gm1027	4	106.35	rs3664637	4	108.06	Y	Y	35.09	39.29	34.66	35.92	1		rs13477907	4	109.54	4.16	5.82	4.5	5.21	0	0
ILMN_1229370	Podn	4	107.69	rs3664637	4	108.06	Y	Y	11.3	29.1	9.18	13.22	3		rs13477907	4	109.54	39.86	34.66	26.36	34.49	1	0
ILMN_1224834	LOC230628	4	114.28	gnf04.110.583	4	114.33	Y	Y	11.35	29.9	2.01	8.21	3		rs3670129	4	114.61	11.71	16.35	15.64	18.07	0	0
ILMN_1258359	Atpaf1	4	115.48	gnf04.110.583	4	114.33	Y	Y	25.86	50.72	26.85	56.24	15		rs3670129	4	114.61	69.46	79.73	79.02	74.85	1	0
ILMN_2755351	BC035295	4	118.9	rs13477940	4	118.1	Y	Y	26.04	57.57	31.42	27.8	1		rs13477940	4	118.27	18.93	25.49	27.86	31.59	15	0
ILMN_1248210	Ebna1bp2	4	118.3	rs13477940	4	118.1	Y	Y	32.77	34.24	32.37	39.49	1		rs13477940	4	118.27	72.87	73.28	66.54	57.59	1	1
ILMN_2691567	Hyi	4	118.04	rs13477940	4	118.1	Y	Y	29.37	37.84	13.37	21.67	6		rs13477940	4	118.27	85.34	87.97	87.69	88.63	1	0
ILMN_3160592	Frg2b	4	119.2	CEL-4_118751423	4	119.9	Y	Y	31.09	20.56	18.63	11.11	2		rs3678308	4	120.42	0.52	1.87	2.22	0.27	0	0
ILMN_2616497	Pabpc4	4	122.96	rs3666537	4	125.98	Y	Y	1.91	8.5	1.8	28.9	5		rs3666537	4	126.15	7.35	6.25	0.06	2.5	0	0
ILMN_1245420	Zmym6	4	126.78	rs13477968	4	126.9	Y	Y	30.91	43.71	41.07	31.4	1		rs13477965	4	126.39	168.64	177.42	166.93	167.85	1	1
ILMN_1256779	Zmym6	4	126.78	rs13477968	4	126.9	Y	Y	25.42	42.79	30.18	37.28	15		rs13477965	4	126.39	81.83	74	73.7	79.85	1	0
ILMN_2734408	Dimt1	13	107.75	rs13477970	4	127.26	N	N	0.41	0.08	3.17	26.2	5		rs3721916	4	127.81	0.44	1.31	3.02	0.7	0	0
ILMN_1218089	LOC384062	4	129.29	rs3023009	4	129.07	Y	Y	35.94	47.19	33.63	40.07	1		rs3023009	4	129.25	43.84	51.77	69.52	70.22	1	1
ILMN_2733514	Hdac1	4	129.19	rs6355837	4	129.22	Y	Y	15.03	28.27	9.1	27.9	10		rs3023009	4	129.25	44.28	51.21	40.56	50.88	1	0
ILMN_1218923	ILM3140129	4		rs3664871	4	132.13	Y	Y	31.22	41.45	25.51	31.22	13		rs3680937	4	133.81	53.51	68.2	41.85	52.01	1	0
ILMN_2579927	Npal3	4	1	rs6404906	4	133.28	Y	Y	14.93	33.69	21.84	11.98	3		rs3680937	4	133.81	31.06	26.48	19.94	32.23	13	0
ILMN_2652394	Tceb3	4	135.56	rs6404906	4	133.28	Y	Y	9.33	26.23	17.33	11.8	3		rs3680937	4	133.81	35.74	22.06	6.89	17.26	2	0
ILMN_2703621	Zfp593	4	133.8	rs6404906	4	133.28	Y	Y	20.7	42.55	23.75	21.42	3		rs3680937	4	133.81	63.29	55	64.93	42.42	1	0
ILMN_2501549	Paqr7	4	134.06	rs6404906	4	133.28	Y	Y	10.82	32.9	21.11	24.96	3		rs3680937	4	133.81	14.17	18.95	9.78	15.74	0	0
ILMN_2681583	Npal3	4	135.01	rs6404906	4	133.28	Y	Y	25.55	58.91	43.27	27.29	15		rs3680937	4	133.81	39.44	42.02	38.86	41.97	1	0
ILMN_2754515	BC059177	4	136.54	rs13478001	4	135.71	Y	Y	22.33	27.98	16.61	30.77	10		rs13478001	4	136	62.98	58.23	39.95	61.61	1	0
ILMN_1216465	LOC329967	4	138.66	rs6234904	4	137.87	Y	Y	12.01	27.51	10.97	21.14	3		rs6234904	4	138.15	36.15	32.57	25.05	38.95	1	0
ILMN_1260400	Zfp78	7	6.32	rs6234904	4	137.87	N	N	0.16	0.53	0.18	26.53	5		rs6234904	4	138.15	0.88	0	0.49	1.13	0	0
ILMN_2777478	Nbl1	4	138.64	rs6234904	4	137.87	Y	Y	17.23	32.45	22.09	34.79	10		rs6234904	4	138.15	51.07	34.94	48.32	62.69	1	0
ILMN_2715931	6030445D17Rik	4	136.02	rs3686214	4	138.83	Y	Y	30.85	14.75	8.62	2.94	2		rs3686214	4	139.11	20.91	26.19	19.11	14.31	3	0
ILMN_1223381	Padi2	4	140.51	rs13478023	4	140.24	Y	Y	22.65	56.33	26.68	34.78	15		rs13478024	4	140.88	54.39	46.92	43.39	48.7	1	0
ILMN_1251972	Padi2	4	140.51	rs13478023	4	140.24	Y	Y	14.7	26.82	30.01	26.23	15		rs13478024	4	140.88	75.47	66.27	53.73	68.37	1	0
ILMN_1255180	Casp9	4	141.35	rs13478024	4	140.6	Y	Y	39.42	45.65	30.67	41.32	1		rs13478024	4	140.88	58.03	48.51	55.23	64.06	1	1
ILMN_1250454	Prdm2	4	142.72	rs13478024	4	140.6	Y	Y	2.82	37.07	15.64	4.99	3		rs13478024	4	140.88	0.98	0.43	0.34	0.1	0	0
ILMN_1212875	Arhgef19	4	140.81	rs13478024	4	140.6	Y	Y	21.5	36.31	29.57	18.57	9		rs13478024	4	140.88	54.62	54.19	61.99	43.37	1	0
ILMN_1250227	Clcnka	4	140.94	D4Mit343	4	141.98	Y	Y	29.23	33.26	31.71	45.95	1		rs3718552	4	142.47	24.17	30.33	26.15	34.38	1	1
ILMN_2757283	Clcnkb	4	140.96	D4Mit343	4	141.98	Y	Y	18.87	30.94	17.64	17.76	3		rs3718552	4	142.47	26.64	31.63	31.87	31.14	1	0
ILMN_2529591	Gm694	4	140.99	D4Mit343	4	141.98	Y	Y	23.12	42.44	30.42	47.31	15		rs3718552	4	142.47	40.68	37.44	36.35	47.33	1	0
ILMN_3160727	Gm694	4	140.99	rs3023025	4	142.45	Y	Y	11.36	31.25	6.32	1.62	3		rs3718552	4	142.47	28.39	12.43	27.45	17.69	7	0
ILMN_2707291	Prdm2	4	142.72	rs3023025	4	142.45	Y	Y	2.83	27.76	5.92	7.2	3		rs3718552	4	142.47	0.23	0.81	1.12	0.25	0	0
ILMN_1220594	Fv1	4	147.24	rs6316136	4	142.64	Y	Y	34.91	79.24	57.82	57.17	1		rs3718552	4	142.47	0.12	0.15	0	0.54	0	0
ILMN_1237595	Fv1	4	147.24	rs6316136	4	142.64	Y	Y	31.17	67.34	44.44	46.5	1		rs3718552	4	142.47	0.32	0.06	2.05	3.41	0	0
ILMN_2590950	Agtrap	4	147.45	rs6316136	4	142.64	Y	Y	39.99	63.77	33.29	33.81	1		rs3718552	4	142.47	0.16	1.91	1.13	0	0	0
ILMN_1216142	Masp2	4	147.98	rs6316136	4	142.64	Y	N	28.46	39.61	28.31	48.63	1		rs3718552	4	142.47	0.73	0.35	0.63	1.75	0	0
ILMN_1248737	A430039K24Rik	19	5.41	rs6316136	4	142.64	N	N	20.49	37.33	13.26	17.05	3		rs3718552	4	142.47	3.53	2.47	1.28	0.02	0	0
ILMN_1256699	Sfi1	4	3.03	rs6316136	4	142.64	Y	Y	12.22	18.79	17.24	37.91	5		rs3718552	4	142.47	4.23	0.02	0.14	2.04	0	0
ILMN_1229019	Fbxo44	4	147.53	rs6316136	4	142.64	Y	Y	21.03	17.73	23.25	31.69	5		rs3718552	4	142.47	0.9	3.99	0.52	0.56	0	0
ILMN_1260218	Sfi1	11	3.07	rs6316136	4	142.64	N	N	8.57	20.66	22.78	27.7	5		rs3718552	4	142.47	0	3.87	0.35	0.19	0	0
ILMN_2736941	Fv1	4	147.24	rs6316136	4	142.64	Y	Y	25.86	41.87	21.89	39.45	10		rs3718552	4	142.47	2.65	0.02	0.88	1.55	0	0
ILMN_1234351	D030067L12Rik	4	146.9	rs6316136	4	142.64	Y	Y	16.97	33.5	26.57	40.64	15		rs3718552	4	142.47	0.24	0.09	0.66	0.61	0	0
ILMN_1238867	Ubiad1	4	147.82	rs6316136	4	142.64	Y	N	23.57	39.59	34.36	48.36	15		rs3718552	4	142.47	0.51	3.37	0.39	3.38	0	0
ILMN_1255527	Dffa	4	148.49	rs13478048	4	149.15	Y	Y	27.41	34.73	16.39	33.36	13		rs13478048	4	149.68	89.34	85.21	95.13	83.65	1	0
ILMN_2513922	Prdm16	4	153.69	rs6181146	4	152.9	Y	Y	9.55	36.46	12.94	10.85	3		rs6181146	4	153.43	0.16	3.67	0.02	0	0	0
ILMN_1251114	Gltpd1	4	154.71	rs6316711	4	154.7	Y	Y	82.26	90.53	70.52	72.58	1		rs3720634	4	155.28	0.3	0.75	0.29	1.08	0	0
ILMN_1221451	Dhrsx	4	155.6	rs3693087	4	154.97	Y	N	37.6	40.48	32.97	30.26	1		rs3693087	4	155.5	46.59	47.08	48.69	49.91	1	1
ILMN_1221520	Pftk1	5	5.01	CEL-5_4604586	5	4.6	Y	Y	10.61	45.66	38.15	21.94	9		CEL-5_4604586	5	4.6	41.14	37.75	46.71	43.01	1	0
ILMN_1231443	Rbm28	6	29.08	rs3714258	5	12.38	N	N	0.44	0.14	2.03	26.76	5		rs3714258	5	12.37	0.31	0.88	2.2	1.24	0	0
ILMN_1233169	C1orf91	4	129.29	mCV23582150	5	13.83	N	N	28.78	13.96	19.59	20.68	2		mCV23582150	5	13.82	0	0.06	0.06	0.01	0	0
ILMN_2618526	AB112350	5	21.17	rs6256752	5	20.76	Y	Y	21.74	42.27	21.86	49.51	10		rs6256752	5	20.75	0.73	0.02	0.71	0.37	0	0
ILMN_1231877	Armc10	5	21.15	rs6256752	5	20.76	Y	Y	24.66	38.47	22.22	29.18	10		rs6256752	5	20.75	0.29	0.01	0.42	4.88	0	0
ILMN_1217776	Mll5	5	22.99	gnf05.017.151	5	22.72	Y	Y	17.14	41.21	19.34	30.08	10		rs6349956	5	24.38	0.74	0.24	0.62	5.93	0	0
ILMN_2747802	5031425E22Rik	5	22.89	gnf05.017.151	5	22.72	Y	Y	23.11	33.33	25.18	31.38	10		rs6349956	5	24.38	0.38	0.02	4.11	10.5	0	0
ILMN_1252650	1500035N22Rik	5	24.5	rs13478144	5	23.83	Y	Y	25.24	24.81	17.77	29.78	5		rs6349956	5	24.38	52.13	82.35	62.59	57.17	1	0
ILMN_1259721	Sorcs2	5	36.4	CEL-5_34263494	5	36.13	Y	Y	13.1	20.05	31.23	21.07	4		CEL-5_34414022	5	36.31	4.33	0.02	0.66	2.08	0	0
ILMN_1232381	Slit2	5	48.48	rs13478217	5	44.45	Y	Y	12.58	31.87	34.87	28.54	15		rs13478217	5	44.56	37.84	62.9	46.27	34.37	1	0
ILMN_1260462	Nsun7	5	66.58	rs13478294	5	63.71	Y	Y	15.81	39.94	18.32	13.33	3		rs13478293	5	63.61	2.71	6.53	3.95	4.99	0	0
ILMN_1260172	Apbb2	5	66.79	rs6267669	5	66.78	Y	Y	16.17	52.69	14.62	26.34	10		rs13478309	5	67.54	3.65	2.07	0.55	2.47	0	0
ILMN_1244545	Ociad1	5	1	gnf05.066.286	5	72.3	Y	Y	20.58	52.15	25.51	21.52	3		gnf05.066.286	5	72.42	8.94	4.64	0.57	0.14	0	0
ILMN_1225390	Ociad1	5	73.7	gnf05.066.286	5	72.3	Y	Y	29.46	32.23	16.66	22.47	6		gnf05.066.286	5	72.42	0.21	1.28	0.14	3.57	0	0
ILMN_2482178	Ociad2	5	73.71	gnf05.066.286	5	72.3	Y	Y	10.55	28.29	8.84	27.3	10		gnf05.066.286	5	72.42	8.33	13.3	18.25	8.18	0	0
ILMN_2683222	Srd5a2l	5	76.58	rs3153753	5	77.22	Y	Y	30.77	54.39	17.43	34.53	13		rs4225290	5	76.58	19.68	25.14	32.51	27.49	15	0
ILMN_1232245	2310040G07Rik	5	77.36	rs6257272	5	77.96	Y	Y	13.29	50.91	30.65	41.95	15		rs4225290	5	76.58	0.7	0.64	0.6	0.94	0	0
ILMN_2501929	Ptprd	4	75.59	rs13478363	5	84.91	N	N	0.84	2.14	0.19	30.96	5		rs13478363	5	84.27	0.61	0.14	0	6.57	0	0
ILMN_1231837	Pcdh9	14	93.41	rs13478363	5	84.91	N	N	0.02	0.2	0.04	27.8	5		rs13478363	5	84.27	3.46	0.36	0.12	2.33	0	0
ILMN_1223395	Trafd1	5	121.82	rs13478370	5	86.54	Y	N	1.01	0.09	3.84	26.57	5		rs13478370	5	85.89	2.59	0.25	0.04	1.88	0	0
ILMN_2706640	Cmya5	13	93.81	rs13465325	5	92.7	N	N	0.49	0.91	0.16	27.45	5		rs13465325	5	92.06	0.01	0.34	0	2.04	0	0
ILMN_2633039	Cox18	5	90.64	rs13478392	5	92.83	Y	Y	43.2	25.87	24.01	12.81	2		rs13465325	5	92.06	1.66	0.17	0.83	0.03	0	0
ILMN_1223147	Art3	5	92.82	rs13478392	5	92.83	Y	Y	15.39	38.39	9.35	11.39	3		rs13465325	5	92.06	1.58	5.67	9.28	1.7	0	0
ILMN_1254526	Bmp2k	5	97.52	rs13478392	5	92.83	Y	Y	27.59	41.14	9.19	49.86	13		rs13465325	5	92.06	25.74	35.7	29.75	32.66	1	0
ILMN_1241171	Anxa3	5	97.27	rs13478398	5	94.8	Y	Y	8.73	32.51	23.5	16.46	3		UT_5_94.545323	5	93.6	32.01	22.53	34.99	28.66	14	0
ILMN_2706468	Coq2	5	101.08	rs3683611	5	100.45	Y	Y	57.71	43.67	25.95	38.86	13		rs13478410	5	98.98	0.32	0.33	0.83	0.73	0	0
ILMN_1242356	2010205O06Rik	5	112.77	rs13459088	5	110.89	Y	Y	5.65	28.5	12.44	19.9	3		rs3708939	5	111.01	25.04	30	40.73	29.41	1	0
ILMN_1256771	Adrbk2	5	113.39	rs13459088	5	110.89	Y	Y	3.86	28.34	6.2	9.19	3		rs3708939	5	111.01	18.73	14.99	15.65	7.7	0	0
ILMN_1218042	LOC383483	5	8.03	rs3657810	5	113.64	Y	Y	34.15	63.76	31.3	38.43	1		rs3657810	5	113.83	49.22	51.07	59.67	55.6	1	1
ILMN_1251865	Msi1	5	115.9	rs3657810	5	113.64	Y	Y	8.51	38.48	21.13	18.13	3		rs3657810	5	113.83	0.97	0.91	0.94	0.34	0	0
ILMN_2744036	Mlec	5	115.6	rs3657810	5	113.64	Y	Y	20.7	30.49	11.34	26.22	10		rs3657810	5	113.83	0.08	0.01	0.64	0.07	0	0
ILMN_2620365	Alkbh2	5	114.57	rs3657810	5	113.64	Y	Y	17.21	38.26	31.11	36.57	15		rs3657810	5	113.83	53.04	47.87	46.71	32.93	1	0
ILMN_1223290	ENSMUSG00000054123	5	115.31	rs3719767	5	115.41	Y	Y	57.08	72.22	54.64	70.99	1		rs13478473	5	114.66	82.52	72.21	83.02	83.38	1	1
ILMN_1246061	LOC239727	5	15.19	rs3719767	5	115.41	Y	Y	63.67	72	42.93	53.03	1		rs13478473	5	114.66	119.97	96.98	103.75	104.92	1	1
ILMN_2500434	1500011B03Rik	5	115.26	rs3719767	5	115.41	Y	Y	50.48	55.86	21.17	57.31	13		rs13478473	5	114.66	102.21	76.5	101.46	78.94	1	0
ILMN_2761205	Hspb8	5	116.86	mCV23798232	5	116.92	Y	Y	35.49	73.14	37.2	32.33	1		mCV23798232	5	117.11	0.76	3.05	2.76	1.25	0	0
ILMN_1240289	BC023744	5	117.8	mCV23798232	5	116.92	Y	Y	43.74	19.74	14.64	28.09	8		mCV23798232	5	117.11	4.86	1.75	0.06	0.06	0	0
ILMN_2477527	2310005C01Rik	5	118.41	D5Mit188	5	118.14	Y	Y	32.1	51.44	34.79	46.45	1		rs13478481	5	117.93	2.83	3.3	6.07	3.28	0	0
ILMN_1222817	Vps33a	5	123.98	rs13478499	5	123.55	Y	Y	28.93	56.03	30.57	34.34	1		rs13478508	5	125.82	0.57	0.63	0.57	0.39	0	0
ILMN_1215860	Dlg1	16	31.77	rs13478499	5	123.55	N	N	23.84	25.07	27.06	23.33	4		rs13478508	5	125.82	0.01	2.01	0.09	0.02	0	0
ILMN_1234970	Mphosph9	5	124.71	rs13478499	5	123.55	Y	Y	27.77	25.75	35.42	26.16	14		rs13478508	5	125.82	0.22	3.46	4.89	0.04	0	0
ILMN_1377918	Ubc	5	125.87	rs3711495	5	126.43	Y	Y	24.16	53.9	22.12	21.28	3		gnf05.120.129	5	126.59	0	5.29	6.82	0.8	0	0
ILMN_2523012	Gtl2	12	110.81	gnf05.120.578	5	126.85	N	N	1.6	27.36	0.2	0.59	3		gnf05.120.578	5	127.04	3.28	0.62	0.74	0.47	0	0
ILMN_1247358	Emid2	5	137.22	rs3708411	5	136.54	Y	Y	14.74	30.93	26.7	16.66	9		rs13478539	5	133.54	2.18	0	5.67	0.22	0	0
ILMN_2466655	Zfp157	5	138.89	rs8265855	5	138.13	Y	Y	40.53	51.61	25.85	44.67	13		rs13478539	5	133.54	1.27	0	0.06	1.24	0	0
ILMN_1236649	B130019G13Rik	5	143.63	rs3684729	5	143.15	Y	Y	28.52	36.96	16.64	22.91	6		rs6284348	5	144.38	2.38	0.06	0.67	0.65	0	0
ILMN_1218097	4921520G13Rik	5	144.65	rs6284348	5	143.88	Y	Y	35.82	45.06	16.61	50.72	13		rs6284348	5	144.38	109.25	114.92	106.04	95.57	1	0
ILMN_1221410	Gpr12	5	147.39	mCV25009162	5	144.79	Y	Y	38.66	43.51	21.85	40.21	13		D5Mit43	5	145.4	19.34	31.12	23.7	9.3	3	0
ILMN_1222250	Rpl21	5	147.65	rs13478586	5	147.16	Y	Y	29.18	27.84	22.83	27.38	13		rs4225605	5	147.77	1.38	2.77	1.91	0.08	0	0
ILMN_2493815	Gtf3a	5	147.77	rs13478587	5	148.04	Y	Y	28.8	34.47	39.83	24.58	12		UT_5_145.838572	5	147.77	14.28	16.53	9.35	8.01	0	0
ILMN_1233836	Pon2	6	5.21	rs13478608	6	5.22	Y	Y	16.36	31.48	15.53	23.08	3		rs13478610	6	5.74	0.02	8.76	2.5	3.27	0	0
ILMN_1239806	Rpa3	6	8.21	rs13478617	6	7.96	Y	Y	55.34	36.95	21.53	35.33	13		rs13478617	6	7.96	71.34	71.42	62.89	63.51	1	0
ILMN_1245768	Ica1	6	8.58	CEL-6_8231384	6	8.45	Y	Y	20.62	40.04	19.48	28.72	10		CEL-6_8371158	6	8.59	21.84	37.64	21.2	33.3	10	10
ILMN_2605183	EG232599	6	17.03	rs13478641	6	16.01	Y	Y	27.97	38.56	29.2	42.09	1		rs13478641	6	16.01	55.44	65.79	52.2	52.38	1	1
ILMN_2650392	Rbm28	6	29.08	rs13478683	6	29.13	Y	Y	12.83	46.53	19.33	16.79	3		gnf06.026.418	6	29.36	77.83	94.45	87.7	94.08	1	0
ILMN_2580180	Ptn	6	36.68	rs13478705	6	34.44	Y	Y	37.28	41.61	38.42	48.74	1		rs13478705	6	34.46	90.59	87.42	99.8	85.45	1	1
ILMN_1223261	Mkrn1	6	39.35	rs6215575	6	38.06	Y	Y	11.5	29.15	16.99	8.2	3		gnf06.033.454	6	36.44	1.79	2.9	0.21	5.47	0	0
ILMN_1255410	Tmem86b	6	37.95	gnf06.037.785	6	40.73	Y	Y	20.52	27.05	16.44	15.88	3		gnf06.037.785	6	40.75	0.01	9.77	2.93	0.06	0	0
ILMN_2460555	Vamp4	1	164.53	gnf06.037.785	6	40.73	N	N	0.05	1.96	5.18	26.07	5		gnf06.037.785	6	40.75	1.82	3.95	2.13	7.11	0	0
ILMN_2429059	Zfp467	6	48.39	rs13478727	6	43.76	Y	Y	12.89	21.74	33.18	8.38	4		rs13478728	6	44.15	0.66	0.56	1.13	1.07	0	0
ILMN_1223771	Zfp282	6	47.84	rs13478739	6	46.96	Y	Y	51.91	52.42	33.54	48.09	1		rs13478735	6	46.18	0.34	1.08	1.95	0.02	0	0
ILMN_1242042	Zfp398	6	47.82	rs13478739	6	46.96	Y	Y	38.95	29.93	12.69	13.6	6		rs13478735	6	46.18	2.6	1.52	1.28	0.1	0	0
ILMN_2648669	Gpnmb	6	49.01	rs3669453	6	48.91	Y	Y	32.02	59.88	48.05	52.98	1		rs13478735	6	46.18	0.05	0.05	0.11	1.83	0	0
ILMN_1250335	Fin15	6	50.15	rs3698072	6	49.37	Y	Y	34.92	65.58	55.45	66.89	1		rs3023069	6	52.19	0.13	2.71	0.08	0.01	0	0
ILMN_1217670	D330028D13Rik	6	49.34	rs3698072	6	49.37	Y	Y	16.48	33.52	9.23	24.59	3		rs3023069	6	52.19	0.02	5.37	0.15	2.19	0	0
ILMN_2580205	Creb5	6	53.56	rs3023069	6	52.17	Y	Y	29.07	25.85	17.11	27.51	8		rs3023069	6	52.19	1.55	0.24	3.59	3.7	0	0
ILMN_2649456	Prr15	6	54.28	rs6272774	6	54.11	Y	Y	27.6	24.36	6.97	8.33	2		rs13478762	6	54.18	0.73	0.1	0.8	0.17	0	0
ILMN_2694767	A030007L17Rik	6	54.94	gnf06.052.076	6	54.48	Y	Y	19.59	30.08	17.06	20.66	3		rs13478762	6	54.18	0.72	0.04	0.9	0	0	0
ILMN_1231445	Inmt	6	55.12	rs6308025	6	55.1	Y	Y	32.57	10.99	23.56	24.74	2		D6Mit384	6	55.15	1.73	0.31	0.19	1.33	0	0
ILMN_1232184	Ggcx	6	72.38	mhcCD8b4	6	71.26	Y	Y	12.97	27.8	4.82	11.81	3		mhcCD8b4	6	71.28	45.86	38.64	39.04	51.54	1	0
ILMN_2738638	Gja9	2	113.84	mhcCD8b4	6	71.26	N	N	0.81	27.77	1.13	2.83	3		mhcCD8b4	6	71.28	4.93	0.94	0.95	0.44	0	0
ILMN_1218118	Tia1	6	86.37	CEL-6_86603542	6	86.24	Y	Y	54.78	56.67	39.53	45.49	1		CEL-6_86603542	6	86.22	135.26	124.44	136.21	137.69	1	1
ILMN_1225818	Tia1	6	86.37	CEL-6_86603542	6	86.24	Y	Y	24.7	47.39	20.75	34.3	10		CEL-6_86603542	6	86.22	39.03	48.27	39.4	40.12	1	0
ILMN_2480669	Aak1	6	86.94	rs4226061	6	86.6	Y	Y	2.66	29.49	3.01	2.4	3		CEL-6_86603542	6	86.22	6.33	12.58	0.9	6.77	0	0
ILMN_1239307	Rrm2	12	25.39	rs4226061	6	86.6	N	N	2.85	27.17	2.98	0.66	3		CEL-6_86603542	6	86.22	2.72	0.19	0.14	1.27	0	0
ILMN_2640862	Lrig1	6	94.55	rs3659436	6	94.61	Y	Y	13.65	24.39	20.55	33.12	5		rs6226609	6	94.63	28.1	32.66	29.84	33.9	1	0
ILMN_2470185	9930039A11Rik	11	68.71	rs13478917	6	97.43	N	N	1.41	0.43	30.36	0.06	4		rs13478917	6	97.42	0.84	0.31	0.03	0.04	0	0
ILMN_1254130	Itpr1	6	108.37	rs13478951	6	105.78	Y	Y	12.78	25.88	26.4	12.26	4		rs3718253	6	105.92	33.24	30.94	49.38	47.2	1	0
ILMN_2684189	Grm7	6	111.45	rs6334121	6	110.9	Y	Y	37.96	57.81	51.56	53.5	1		rs6290844	6	111.42	89.91	93.69	123.81	82.03	1	1
ILMN_1236474	Slc6a1	6	114.26	D6Mit150	6	116.12	Y	Y	6.67	38.34	8.65	12.47	3		rs3023088	6	115.12	0.28	0.11	3.53	0.55	0	0
ILMN_1253270	D430030C18Rik	6	116.18	D6Mit150	6	116.12	Y	Y	25.46	57.68	40.49	36.05	15		rs3023088	6	115.12	0.76	0.33	0.21	0.16	0	0
ILMN_1224932	E430003D02Rik	6	131.91	rs13478993	6	117.07	Y	N	40.85	62.53	35.74	42.72	1		rs13478997	6	118.02	0.88	0.28	0.26	0.05	0	0
ILMN_1218308	Adipor2	6	119.31	rs6306957	6	119.38	Y	Y	12.63	28.49	28.03	23.19	9		rs13478999	6	118.75	0.38	0	3.12	0.34	0	0
ILMN_2464201	3110021A11Rik	6	119.8	rs13479001	6	119.53	Y	Y	28.83	32.73	23.09	43.73	13		rs13478999	6	118.75	2.45	0.31	6.31	0.4	0	0
ILMN_2652572	Ing4	6	125	UT_6_123.37228	6	121.64	Y	Y	27.69	36.99	13.3	25.88	6		UT_6_123.37228	6	121.63	37.31	51.92	34.56	26.07	1	0
ILMN_1219146	Cops7a	6	124.91	gnf06.122.747	6	124.02	Y	Y	36.28	61.84	26.89	28.04	1		gnf06.122.747	6	124.01	63.25	87.92	86.7	57.76	1	1
ILMN_2625747	Ncapd2	6	125.12	gnf06.122.747	6	124.02	Y	Y	8.56	27.79	16.45	20.01	3		gnf06.122.747	6	124.01	7.77	19.79	30.61	18.18	4	0
ILMN_1260001	9630033F20Rik	6	127.04	CEL-6_127435117	6	126.77	Y	Y	23.7	58.19	34.53	45.13	15		CEL-6_127435117	6	126.75	58.74	73.44	62.29	49.29	1	0
ILMN_2700166	Ccnd2	6	127.08	rs13479023	6	127.4	Y	Y	11.11	26.1	25.42	4.21	3		rs13479023	6	127.39	38.13	43.22	44.45	30.77	1	0
ILMN_2531773	BC048546	6	128.49	rs13479023	6	127.4	Y	Y	22.9	32.3	14.85	29.37	10		rs13479023	6	127.39	24.7	36.91	30.33	30.96	1	0
ILMN_1214767	Tulp3	6	128.28	rs13479023	6	127.4	Y	Y	17.1	26.02	32.48	29.75	15		rs13479023	6	127.39	41.34	58.96	33.96	25.15	1	0
ILMN_1246449	2210419D22Rik	6	134.4	rs13479053	6	134.22	Y	Y	33.26	58.42	38.61	36.09	1		rs13479051	6	133.8	0.61	1.33	0.02	0.19	0	0
ILMN_2712949	Lrp6	6	134.4	rs13479053	6	134.22	Y	Y	36.43	67.42	44.69	68.75	1		rs13479051	6	133.8	0.05	0.3	1.11	0.07	0	0
ILMN_2467596	Dusp16	6	134.67	rs13479055	6	134.59	Y	Y	43.12	81.99	41.47	60.16	1		rs13479051	6	133.8	4.27	0.77	0.78	0.18	0	0
ILMN_1257801	Gpr19	6	134.82	rs13479055	6	134.59	Y	Y	27	50.47	30.56	39.3	1		rs13479051	6	133.8	0.05	2.35	0.28	0.03	0	0
ILMN_2419051	2700089E24Rik	6	133.06	rs13479055	6	134.59	Y	Y	28.88	11.02	2.97	10.62	2		rs13479051	6	133.8	13.84	38.19	31.22	21.43	9	0
ILMN_2642913	Emp1	6	135.33	rs13479055	6	134.59	Y	Y	8.44	7.83	6.5	28.7	5		rs13479051	6	133.8	0.95	0.01	0.49	0.01	0	0
ILMN_2705078	Csda	6	131.33	rs13479058	6	135.29	Y	Y	3.03	28.84	12.9	13.43	3		rs13479060	6	135.84	0.56	0.02	0.83	0.15	0	0
ILMN_2632162	Crebl2	6	134.81	rs13479058	6	135.29	Y	Y	0.67	28.79	10.91	6.89	3		rs13479060	6	135.84	0.04	0.4	0	0	0	0
ILMN_1213144	Wbp11	6	136.76	rs13479065	6	136.71	Y	Y	30.16	53.98	32.94	46.57	1		rs13479065	6	136.7	104.14	105.95	90.55	109.32	1	1
ILMN_1222767	H2afj	6	136.76	rs13479065	6	136.71	Y	Y	4.9	28.1	17.89	19.14	3		rs13479065	6	136.7	65.41	71.76	44.97	60.21	1	0
ILMN_2524980	H2afj	6	136.76	rs13479065	6	136.71	Y	Y	24.17	49.25	33.41	29.36	15		rs13479065	6	136.7	25.73	48.52	21.47	25.87	13	0
ILMN_2628188	Fgfr1op2	6	146.53	rs6152631	6	144.01	Y	Y	5.33	28.98	6.08	12.24	3		rs3089737	6	145.41	2.22	1.72	0.39	0.07	0	0
ILMN_1259991	Arntl2	6	146.78	rs3089737	6	145.41	Y	Y	4.48	35.25	0.35	2.91	3		rs3089737	6	145.41	0.26	0.97	0.18	0.28	0	0
ILMN_2513570	AW123240	6	145.77	rs3089737	6	145.41	Y	Y	36.04	31.41	16.58	30.42	13		rs3089737	6	145.41	30.31	24.16	42.52	30.78	1	0
ILMN_1216235	Kptn	7	16.71	rs13479126	7	11.1	Y	N	39.29	42.01	36.95	44.23	1		CEL-7_6502564	7	14.43	106.37	113.23	91.39	76.32	1	1
ILMN_2601928	0710005I19Rik	7	17.55	rs13479126	7	11.1	Y	N	50.05	66.55	39.56	56.44	1		CEL-7_6502564	7	14.43	4.08	12.15	6.43	2.66	0	0
ILMN_1228750	ZBTB45	7	13.59	rs13479126	7	11.1	Y	Y	28.69	16.25	19.9	5.75	2		CEL-7_6502564	7	14.43	4.14	4.81	7.26	4.14	0	0
ILMN_2623531	Napa	7	16.7	rs13479126	7	11.1	Y	N	20.68	27.37	19.94	30.24	10		CEL-7_6502564	7	14.43	23.04	15.97	14.76	12.64	0	0
ILMN_2732642	Kptn	7	16.71	rs13479126	7	11.1	Y	N	24.87	36.74	27.96	27.32	15		CEL-7_6502564	7	14.43	73.95	69.74	50.09	71.74	1	0
ILMN_1237061	Dmpk	7	19.68	D7Mit57	7	18.86	Y	Y	7.71	42.74	6.86	18.83	3		rs3672220	7	19.79	36.9	51.57	48.32	25.71	1	0
ILMN_2631903	1700008P20Rik	7	25.12	CEL-7_12787527	7	23.76	Y	Y	26.04	24.94	16.59	26.91	8		CEL-7_13089324	7	25.14	0.67	0.24	0.8	1.71	0	0
ILMN_2450096	Zfp30	7	30.58	rs4226520	7	29.49	Y	Y	20.69	33.15	8.01	11.62	3		rs6208019	7	30.69	2.31	7.65	2.73	1.6	0	0
ILMN_2619639	AI428936	7	31.1	rs4226520	7	29.49	Y	Y	29.48	26.78	22.78	21.28	6		rs6208019	7	30.69	3.64	0	1.53	4.33	0	0
ILMN_1240857	Cox7a1	7	30.97	rs4226520	7	29.49	Y	Y	16.04	29.53	4.45	30.39	10		rs6208019	7	30.69	7.71	1.07	4.19	2.45	0	0
ILMN_1244995	ILM102450041	7		rs4226520	7	29.49	Y	Y	24.1	39.19	26.47	31.72	15		rs6208019	7	30.69	5.66	8.05	0.87	1	0	0
ILMN_1257921	4931406P16Rik	7	35.03	CEL-7_20141278	7	30.87	Y	Y	44.77	43.72	32.1	35.73	1		rs3662961	7	31.51	0.16	0.1	0.49	0.01	0	0
ILMN_2430422	Gpi1	7	34.99	CEL-7_20141278	7	30.87	Y	Y	28.51	39.33	28.72	38.39	1		rs3662961	7	31.51	3.08	8.92	14.48	5.02	0	0
ILMN_1242680	2310022K01Rik	7	31.44	CEL-7_20141278	7	30.87	Y	Y	12.49	27.94	6.04	10.88	3		rs3662961	7	31.51	10.83	14.07	9.49	5.52	0	0
ILMN_1225192	AY078069	7	31.21	CEL-7_20141278	7	30.87	Y	Y	11.14	12.66	29.72	6.97	4		rs3662961	7	31.51	4.98	6.83	6.11	15.44	0	0
ILMN_2761445	Lin37	7	31.34	CEL-7_20141278	7	30.87	Y	Y	31.63	46.26	25.58	19.28	6		rs3662961	7	31.51	1.5	7.14	4	0.02	0	0
ILMN_2601441	4931406P16Rik	7	35.02	CEL-7_20141278	7	30.87	Y	Y	23.93	34.16	25.19	29	10		rs3662961	7	31.51	8.14	0.76	0.35	0.31	0	0
ILMN_2746906	Nudt19	7	36.33	rs6239372	7	34.41	Y	Y	63.48	70.53	34.56	48.43	1		rs3699705	7	35.85	64.42	72.67	88.89	65.53	1	1
ILMN_2750402	Nudt19	7	36.34	rs6239372	7	34.41	Y	Y	46.59	50	37.74	34.74	1		rs3699705	7	35.85	47.53	75.33	60.63	47.62	1	1
ILMN_2705196	BC043301	7	50.83	gnf07.032.889	7	40.7	Y	N	14.72	22.23	20.53	35.41	5		gnf07.032.889	7	48.18	68.66	69.05	57.43	70.47	1	0
ILMN_2588556	Zfp715	7	50.55	gnf07.032.889	7	40.7	Y	N	20.42	30.96	25.53	30.29	10		gnf07.032.889	7	48.18	65.03	68.99	82.38	69.33	1	0
ILMN_1237313	1700021P22Rik	7	51.76	rs3719256	7	44.41	Y	N	27.56	31.57	33.21	36.39	1		UT_7_38.436442	7	52.71	100.49	108.62	103.94	98.91	1	1
ILMN_2686353	Sult2b1	7	52.99	rs13479226	7	45.46	Y	N	14.44	32.6	7.23	15.5	3		UT_7_38.436442	7	52.71	24.3	22.55	30.17	14.95	7	0
ILMN_1231387	Ccdc114	7	53.2	rs13479226	7	45.46	Y	N	27.49	34.79	19.72	43.36	13		UT_7_38.436442	7	52.71	4.34	10.01	11.49	9.43	0	0
ILMN_1251874	Pscd2	7	53.06	rs13479226	7	45.46	Y	N	21.62	29.29	34.46	32.44	15		UT_7_38.436442	7	52.71	5.99	8.56	7.78	0.79	0	0
ILMN_2705349	Nipa1	7	63.23	rs3676147	7	49.66	Y	N	16.2	10.08	24.56	27.81	5		rs13479239	7	57.51	23.16	31.52	35.02	26.9	15	0
ILMN_1255861	Gabrb3	7	65.08	gnf07.050.858	7	56.39	Y	N	31.91	40.58	26.39	35.69	1		gnf07.050.858	7	63.78	46.13	44.14	41.11	35.69	1	1
ILMN_2463259	Kif14	1	138.43	gnf07.050.858	7	56.39	N	N	19.88	34.8	38.07	37.04	15		gnf07.050.858	7	63.78	0.69	0.18	0.02	0.47	0	0
ILMN_1228434	LOC381946	7	66.93	rs13479276	7	58.33	Y	N	36.96	51.15	68	59.33	1		D7Mit91	7	65.75	0.05	0.1	0.45	0	0	0
ILMN_2452619	Ube3a	7	66.53	rs13479276	7	58.33	Y	N	27.05	43.1	39.42	36.17	1		D7Mit91	7	65.75	2.33	0.03	0.5	0.53	0	0
ILMN_1231535	LOC381888	7	67.05	rs13479276	7	58.33	Y	N	29.13	39.6	42.56	41.83	1		D7Mit91	7	65.75	0.12	0	0	0.21	0	0
ILMN_2463259	Kif14	1	138.43	rs13479276	7	58.33	N	N	19.88	34.8	49.49	37.04	15		D7Mit91	7	65.75	0.66	0	0.02	0.63	0	0
ILMN_2560567	A630006E02Rik	10	79.48	rs3693478	7	59.91	N	N	0.2	0.26	28.29	0.03	4		rs13479278	7	66.07	2.67	2.1	6.51	1.09	0	0
ILMN_2696537	Tm2d3	7	72.84	rs6392557	7	64.82	Y	N	29.3	26.41	23.43	27.49	13		rs3717846	7	71.66	43.78	61.77	45.29	35.73	1	0
ILMN_1237578	Aldh1a3	7	73.55	D7Mit199	7	65.81	Y	N	24.6	32.17	19.67	34.26	10		rs13479309	7	74.16	44.21	65.76	57.49	65.68	1	0
ILMN_2568571	Slco3a1	7	81.54	rs13479339	7	74.22	Y	N	9.88	32.7	24.77	9.75	3		rs13479335	7	80.65	0.13	0.01	0.47	3.25	0	0
ILMN_1239333	Iqgap1	7	87.86	rs4226715	7	80.14	Y	N	16.71	26.89	17.48	12.56	3		rs4226715	7	87.41	27.54	13.05	12.75	22.28	2	0
ILMN_1226901	Man2a2	7	87.51	rs4226715	7	80.14	Y	N	9.97	38.65	11.03	20.57	3		rs4226715	7	87.41	71.97	57.5	69.99	68.8	1	0
ILMN_1243974	Akap13	7	82.35	rs3718695	7	81.86	Y	Y	59.73	76.03	51.24	67.74	1		rs3718695	7	89.13	7.79	0.01	0.56	0.28	0	0
ILMN_1217241	Klhl25	7	83.01	rs3718695	7	81.86	Y	Y	33.24	25.93	20.79	42.44	8		rs3718695	7	89.13	48.26	51.55	40.7	51.92	1	0
ILMN_1215172	Folh1	7	93.86	gnf07.079.162	7	84.63	Y	N	45.81	52.2	40.77	49.77	1		gnf07.077.456	7	90.19	109.04	107.26	109.16	110.86	1	1
ILMN_1239117	Hbb-b1	7	110.98	rs3672782	7	87.88	Y	N	12.36	34.13	1.55	11.26	3		rs13479390	7	95.31	6.93	4.44	5.59	2.45	0	0
ILMN_1229203	Hbb-b1	7	110.98	rs3672782	7	87.88	Y	N	10.31	28.15	0.01	5.03	3		rs13479390	7	95.31	6.94	3.57	10.66	2.79	0	0
ILMN_1238486	Ctsc	7	95.46	rs3672782	7	87.88	Y	N	31.89	40.76	19.2	30.91	13		rs13479390	7	95.31	2.73	2.23	0.06	7.16	0	0
ILMN_1236334	Me3	7	97	rs3658777	7	89.49	Y	N	19.73	30.9	2.91	13.75	3		rs13479393	7	96.56	1.15	1.64	0.95	0.01	0	0
ILMN_1219683	ENSMUSG00000039373	7	97	rs3658777	7	89.49	Y	N	12.51	17.06	9.11	34.97	5		rs13479393	7	96.56	1.3	1.29	1.47	0.83	0	0
ILMN_1246132	E230029C05Rik	7	97.2	rs13479395	7	89.94	Y	Y	28.64	44.49	40.24	43.12	1		rs13479397	7	97.62	38.66	26.74	28.96	28.76	1	1
ILMN_1259294	Tmem126b	7	97.62	rs13479395	7	89.94	Y	N	30.63	47.9	36.52	47.63	1		rs13479397	7	97.62	87.98	101.24	86.35	101.84	1	1
ILMN_2594076	2810406K13Rik	7	106.62	rs13479416	7	95.86	Y	N	16.27	33.52	17.8	34.74	10		rs13479419	7	104.02	54.16	43.3	39.15	43.22	1	0
ILMN_1241088	Nars2	7	104.21	rs3699086	7	95.98	Y	N	41.9	37.64	31.05	73.77	1		rs13479419	7	104.02	130.4	125.49	141.13	143.25	1	1
ILMN_2644175	P4ha3	7	107.47	rs3699086	7	95.98	Y	N	11.99	11.74	20.82	27.08	5		rs13479419	7	104.02	40	34.25	28.15	25.66	1	0
ILMN_2658182	Rsf1	7	104.83	rs8281437	7	98	Y	N	34.14	34.59	32.67	56.01	1		rs8281437	7	105.27	97.66	96.49	97.28	108.24	1	1
ILMN_2753077	Arrb1	7	106.75	rs8281437	7	98	Y	N	33.76	40.13	37.32	43.84	1		rs8281437	7	105.27	39.95	40.12	44.29	45.66	1	1
ILMN_1214850	Pak1	7	105.06	rs8281437	7	98	Y	N	28.93	37.23	37.09	40.53	1		rs8281437	7	105.27	0.07	0.02	2.09	0.38	0	0
ILMN_1251839	Myo7a	7	105.2	rs8281437	7	98	Y	N	40.19	39.57	38.19	39.52	1		rs8281437	7	105.27	16.44	14.54	19.77	10.17	0	0
ILMN_2760568	Rnf169	7	107.07	rs8281437	7	98	Y	N	21.05	12.47	23.05	33.34	5		rs8281437	7	105.27	31.13	23.28	27.59	32.63	14	0
ILMN_1225901	Aqp11	7	104.88	rs8281437	7	98	Y	N	16.44	29.83	15.91	40.05	10		rs8281437	7	105.27	73.17	63.1	49.62	84.63	1	0
ILMN_1233970	Arrb1	7	106.75	rs8281437	7	98	Y	N	17.69	19.26	26.96	27.92	11		rs8281437	7	105.27	14.23	21.96	23.39	21.99	0	0
ILMN_2698985	Arrb1	7	106.75	rs8281437	7	98	Y	N	31.51	20.38	35.93	28.44	14		rs8281437	7	105.27	28.84	39	35.48	46.22	1	0
ILMN_1258770	Lrrc51	7	109.06	rs4226829	7	100.35	Y	N	26.71	35.5	29.39	40.09	1		rs4226829	7	107.63	37.97	35.82	43.2	57.41	1	1
ILMN_1258715	Rrm1	7	109.62	rs4226829	7	100.35	Y	N	32.63	32.54	29.94	38.64	1		rs4226829	7	107.63	1.07	1.5	2.11	2.09	0	0
ILMN_1235347	Frag1	7	109.38	rs4226829	7	100.35	Y	N	34.05	27.33	23.57	18.85	6		rs4226829	7	107.63	1.67	0.01	0.34	0.07	0	0
ILMN_2665054	Frag1	7	109.39	rs4226829	7	100.35	Y	N	39.44	26.56	17.26	22.12	6		rs4226829	7	107.63	2.63	0.08	0.22	0.6	0	0
ILMN_2693827	Atg16l2	7	108.44	rs4226829	7	100.35	Y	N	16.96	33.43	16.02	27.52	10		rs4226829	7	107.63	90.63	55.87	80.02	71.01	1	0
ILMN_2751492	Frag1	7	109.38	rs4226829	7	100.35	Y	N	34.38	34.59	17.72	29.11	13		rs4226829	7	107.63	0.12	1.02	0.06	0.03	0	0
ILMN_1236131	Mrpl48	7	107.7	rs4226829	7	100.35	Y	N	23.99	30	31.74	45.82	15		rs4226829	7	107.63	35.88	64.24	51.81	47.79	1	0
ILMN_1259939	Trim3	7	112.76	rs3662937	7	104.11	Y	N	24.38	27.2	27.75	22.42	9		rs3662937	7	111.38	62.57	72.62	76.9	52.84	1	0
ILMN_1255462	Hbb-b2	7	110.98	rs13479447	7	105.64	Y	N	27.57	29.25	29.92	39.62	1		rs13479447	7	112.91	2.97	0.49	1.68	0.61	0	0
ILMN_1227203	Trim12	7	111.46	rs13479447	7	105.64	Y	N	18.07	41.04	22.7	19.54	3		rs13479447	7	112.91	43.73	54.86	40.68	38.5	1	0
ILMN_2449120	2011-09-11	5	93.6	rs13479447	7	105.64	N	N	2.21	0.63	27.81	4.74	4		rs13479447	7	112.91	0.4	2.17	0.05	1.56	0	0
ILMN_1216122	Mrpl48	7	107.71	rs13479447	7	105.64	Y	Y	30.77	25.84	36.65	34.62	14		rs13479447	7	112.91	24.17	28.74	30.24	26.64	1	0
ILMN_1239117	Hbb-b1	7	110.98	rs13479451	7	107.16	Y	Y	32.94	12.03	11.89	12.05	2		rs6386601	7	114.75	3.51	4.39	0.13	0.15	0	0
ILMN_1235934	Btk	X	131.08	rs13479451	7	107.16	N	N	0.11	0.01	29.92	0.4	4		rs6386601	7	114.75	0.05	0.24	0.34	0.24	0	0
ILMN_1219253	Olfml1	7	114.73	rs13479451	7	107.16	Y	N	32.91	45.6	25.32	22.51	6		rs6386601	7	114.75	64.88	64.81	54.55	51.27	1	0
ILMN_1236437	9030624J02Rik	7	125.74	gnf07.114.758	7	117.6	Y	N	84.31	63.51	49.08	69.46	1		gnf07.114.758	7	124.95	63.31	71.22	86.32	58.04	1	1
ILMN_2717621	Rps15a	7	125.25	gnf07.114.758	7	117.6	Y	N	59.7	65.28	50.53	59.19	1		gnf07.114.758	7	124.95	67.22	78.44	92.01	56.7	1	1
ILMN_1223082	E030018N11Rik	7	125.63	gnf07.114.758	7	117.6	Y	N	41.07	20.76	10.23	18.06	2		gnf07.114.758	7	124.95	9.74	12.24	14.01	13.71	0	0
ILMN_1217705	C130002K18Rik	7	125.34	gnf07.114.758	7	117.6	Y	N	25.96	33.48	24.44	33.11	10		gnf07.114.758	7	124.95	52.36	51.17	60.52	28.05	1	0
ILMN_2501267	Tmc7	7	125.68	gnf07.114.758	7	117.6	Y	N	33.67	36.17	14.58	28.96	13		gnf07.114.758	7	124.95	41.54	55.08	65.09	54.75	1	0
ILMN_2722488	Thumpd1	7	119.51	D7Mit330	7	119.45	Y	Y	100.33	102.53	61.97	68.95	1		mCV24269234	7	127.1	72.46	92.32	110.87	59.53	1	1
ILMN_1221039	Exod1	7	126.93	D7Mit330	7	119.45	Y	N	22.86	27.64	8.76	12.63	3		mCV24269234	7	127.1	18.76	12.86	17.72	10.02	0	0
ILMN_1245946	9130403I23Rik	3	8.93	D7Mit371	7	132.1	N	N	0.02	0.43	6.57	28.35	5		rs8236684	7	138.17	2.74	0.42	1.12	0.07	0	0
ILMN_2746895	Gpr120	19	38.19	D7Mit371	7	132.1	N	N	0.08	2.18	8.13	26.43	5		rs8236684	7	138.17	0.48	0.15	0.73	0.26	0	0
ILMN_2601254	9430038I01Rik	7	144.57	CEL-7_122458955	7	134.67	Y	N	17.27	10.73	1.77	28.45	5		CEL-7_122458955	7	142.03	3.98	0	2.91	1.13	0	0
ILMN_1232183	Mgmt	7	144.32	gnf07.132.051	7	135.07	Y	N	68.07	70.94	42.18	51.81	1		gnf07.132.051	7	142.42	8.05	1.75	1.17	4.31	0	0
ILMN_1243625	Ccdc88a	11	28.47	rs6392543	7	137.98	N	N	26.83	9.42	8.82	11.63	2		CEL-7_126301023	7	145.85	3.35	4.21	1.93	1.79	0	0
ILMN_2601471	Ccnd1	7	152.12	rs3686436	7	144.26	Y	N	17.79	28.28	14.27	8.62	3		rs3686436	7	151.63	0.03	0.25	0.03	0.04	0	0
ILMN_2669793	Ccnd1	7	152.12	rs3686436	7	144.26	Y	N	20.62	35.88	18.68	26.28	10		rs3686436	7	151.63	8.53	5.66	16.6	7.57	0	0
ILMN_2744890	Gadd45g	13	51.94	rs13479605	8	10.52	N	N	2.48	30.3	0	1.63	3		rs6343961	8	14.48	0.01	0.57	0.36	0.77	0	0
ILMN_1256701	Kbtbd11	8	15.03	rs6343961	8	14.48	Y	Y	34.21	49.82	22	29.19	13		rs6343961	8	14.48	0.08	2.4	2.92	0.01	0	0
ILMN_1250939	Agpat5	8	18.88	rs3699118	8	18.51	Y	Y	91.62	73.21	45.96	84.79	1		rs3699118	8	18.51	87.4	111.47	111.67	73.27	1	1
ILMN_1223912	LOC382159	8	20.01	rs3699118	8	18.51	Y	Y	16.96	31.8	19.78	13.07	3		rs3699118	8	18.51	6.58	2.93	3.34	6.73	0	0
ILMN_2423609	9530057J20Rik	8	19.92	rs3699118	8	18.51	Y	Y	5.18	30.41	4.43	18.17	3		rs3699118	8	18.51	0.22	2.85	3.4	2.08	0	0
ILMN_1233406	LOC385256	8	20	rs3699118	8	18.51	Y	Y	8.07	28.93	5.35	6.59	3		rs3699118	8	18.51	1.63	11.13	7.21	4.49	0	0
ILMN_1254148	Golga7	8	24.36	gnf08.020.641	8	23.61	Y	Y	31.64	41.17	27.91	27.06	1		UT_8_21.284885	8	23.54	1.4	1.11	2.81	0.2	0	0
ILMN_3160963	C8orf40	8	23.57	gnf08.020.641	8	23.61	Y	Y	13.88	38.36	15.49	13.35	3		UT_8_21.284885	8	23.54	0.03	1.29	2.78	0.6	0	0
ILMN_2481836	Rnf170	8		rs13459102	8	26.49	Y	Y	44.34	59.21	34.54	46.84	1		rs3721201	8	24.97	0.11	0	0.93	0.04	0	0
ILMN_1246289	Got1l1	8	28.31	rs13459102	8	26.49	Y	Y	30.31	10.55	19.41	24.08	2		rs3721201	8	24.97	20.76	17.5	10.51	17.19	0	0
ILMN_2611295	Dusp26	8	32.21	rs4227096	8	32.73	Y	Y	28.16	11.23	6.95	12.78	2		rs13479678	8	31.81	1.08	0.28	1.2	5.23	0	0
ILMN_1258965	Tmem66	8	35.23	rs3680402	8	34.29	Y	Y	27	30.54	20.49	16.71	6		gnf08.031.589	8	34.17	0.17	0.31	2.47	3.8	0	0
ILMN_1248763	Thex1	8	36.53	D8Mit189	8	35.74	Y	Y	44.02	48.96	46.95	30.11	1		D8Mit224	8	34.19	2.17	1.35	0.12	0.14	0	0
ILMN_2522460	3010031K01Rik	8	37.16	rs13479702	8	37.61	Y	Y	31.22	26.86	26.03	25.71	12		D8Mit224	8	34.19	0.06	1.29	1.64	0.03	0	0
ILMN_2731237	D8Ertd82e	8	37.21	rs13479702	8	37.61	Y	Y	27.47	39.32	23.62	34.31	13		D8Mit224	8	34.19	0.05	0.21	5.84	0.64	0	0
ILMN_1250309	Lonrf1	8	37.28	D8Mit294	8	40.9	Y	Y	15.49	32.91	15.65	20.74	3		rs3666140	8	44.05	2.38	0.01	1.6	2.6	0	0
ILMN_1242370	Fgl1	8	42.28	rs3664354	8	41.51	Y	Y	37.47	18.07	21.1	31.92	8		rs3666140	8	44.05	1.52	0.77	0.07	0.01	0	0
ILMN_2722260	4930431L04Rik	8	60.95	rs6399377	8	60.6	Y	Y	26.56	24.53	20.85	25.21	2		rs3685424	8	60.24	31.35	33.13	19.82	43.73	13	0
ILMN_1241640	Sh3rf1	8	63.83	rs6399377	8	60.6	Y	Y	27.32	19.81	15.29	27.78	8		rs3685424	8	60.24	0.5	1.89	0.27	2.89	0	0
ILMN_2703023	Fcho1	8	74.23	rs13479811	8	69.98	Y	Y	9.54	26.26	1.88	5.03	3		rs3702472	8	70.61	0.13	0	5.71	0.73	0	0
ILMN_2596757	ENSMUSG00000057924	8	71.92	rs13479813	8	70.84	Y	Y	68.65	49.49	34.4	51.22	1		rs3702472	8	70.61	0.47	0.22	4.03	0.09	0	0
ILMN_1245214	Slc5a5	8	73.41	rs13479813	8	70.84	Y	Y	65.78	59.86	45.3	68.24	1		rs3702472	8	70.61	0.1	0.18	4.06	0.05	0	0
ILMN_2589915	Hapln4	8	72.61	rs13479813	8	70.84	Y	Y	44.53	65.53	29.01	37.36	1		rs3702472	8	70.61	0.01	0.01	3.81	0.79	0	0
ILMN_2667463	Ocel1	8	73.9	rs13479813	8	70.84	Y	Y	40.84	53.78	27.16	63.01	1		rs3702472	8	70.61	0.01	1.49	2.56	0	0	0
ILMN_2654341	Ncan	8	72.62	rs13479813	8	70.84	Y	Y	42.82	49.61	39.07	49.49	1		rs3702472	8	70.61	1.86	3.34	6.39	0.85	0	0
ILMN_1232067	Ccdc124	8	73.39	rs13479813	8	70.84	Y	Y	38.34	23.85	23.64	21.51	2		rs3702472	8	70.61	0.01	0.62	2.33	0.44	0	0
ILMN_2747811	Crlf1	8	73.03	rs13479813	8	70.84	Y	Y	28.88	22.6	13.6	15.32	2		rs3702472	8	70.61	0.57	5.2	1.01	12.34	0	0
ILMN_1226315	Pbx4	8	72.27	rs13479813	8	70.84	Y	Y	20.15	30.85	13.31	25.37	3		rs3702472	8	70.61	1.24	1.53	1.63	0.15	0	0
ILMN_2458545	A930019L04Rik	8	72.54	rs13479813	8	70.84	Y	Y	12.39	27.26	15.82	15.81	3		rs3702472	8	70.61	0.01	0.65	0.18	0	0	0
ILMN_1251239	1700012B09Rik	9	14.57	rs13479813	8	70.84	N	N	0.01	0.03	3.57	26.3	5		rs3702472	8	70.61	0.01	0.01	0.88	0.27	0	0
ILMN_1230426	Homer3	8	72.81	rs13479813	8	70.84	Y	Y	44.66	33.59	17.21	25.36	6		rs3702472	8	70.61	0.01	0.2	0.49	1.57	0	0
ILMN_2749747	2410004L22Rik	8	73.78	rs13479813	8	70.84	Y	Y	38.18	27.29	15.17	25.29	6		rs3702472	8	70.61	0.94	1.46	0.89	0.44	0	0
ILMN_1230845	scl000554.1_19	8	73.32	rs13479813	8	70.84	Y	Y	25.16	38.36	22.73	29.6	10		rs3702472	8	70.61	0.74	0.18	0.04	1.24	0	0
ILMN_2727911	Gmip	8	72.35	rs13479813	8	70.84	Y	Y	9.9	30.72	3.95	27.29	10		rs3702472	8	70.61	1.28	3.54	0.54	0.04	0	0
ILMN_2692723	Lpl	8	71.43	rs13479813	8	70.84	Y	Y	49.92	58.2	23.62	26.37	13		rs3702472	8	70.61	77.09	69.5	84.95	75.18	1	0
ILMN_2677782	Pbx4	8	72.39	rs13479813	8	70.84	Y	Y	33.28	26.39	22.25	27.89	13		rs3702472	8	70.61	0.54	0.34	0.26	1.57	0	0
ILMN_1224110	Bst2	8	74.06	rs13479813	8	70.84	Y	Y	20.23	36.38	28.17	28.06	15		rs3702472	8	70.61	0.66	0.59	0.11	0	0	0
ILMN_2571616	Tpm4	8	74.66	rs6293022	8	75.34	Y	Y	22.13	33.08	33.49	42.91	15		D8Mit145	8	74.27	0.86	1.78	0.21	5.71	0	0
ILMN_2610234	Il15	8	84.86	rs3719174	8	83.77	Y	Y	18.29	38.86	9.38	18.53	3		D8Mit345	8	81.27	0.62	6.33	0.01	0.64	0	0
ILMN_2440789	Zfp330	8	85.29	rs3719174	8	83.77	Y	Y	40.84	42.08	15.09	15.59	6		D8Mit345	8	81.27	0.73	0.03	5.09	2.26	0	0
ILMN_1226239	Inpp4b	8	84.65	rs13479859	8	84.94	Y	Y	34.66	40.42	38.75	30.1	1		D8Mit345	8	81.27	1.7	0.04	0.66	2.95	0	0
ILMN_1212985	Cacna1a	8	87.04	rs13479825	8	86.07	Y	Y	39.17	42.49	29.81	28.72	1		rs6186316	8	90.02	0.59	0.05	0.02	1.46	0	0
ILMN_1240677	Gadd45gip1	8	87.36	rs13479825	8	86.07	Y	Y	78.13	67.91	40.61	63.78	1		rs6186316	8	90.02	2.52	2.45	1.34	1.07	0	0
ILMN_2698699	Farsa	8	87.39	rs13479825	8	86.07	Y	Y	24.11	39.09	21.02	17.26	3		rs6186316	8	90.02	4.92	6.28	0.09	6.46	0	0
ILMN_1244755	Elmod2	8	85.85	rs13479825	8	86.07	Y	Y	25.06	28.84	17.27	10.82	3		rs6186316	8	90.02	2.5	4.47	0.06	0.06	0	0
ILMN_2707967	Man2b1	8	87.62	rs13479825	8	86.07	Y	Y	29.06	38.7	27.05	21.35	12		rs6186316	8	90.02	0.02	1.86	0	3.4	0	0
ILMN_1252737	Vps35	8	87.78	rs13479825	8	86.07	Y	Y	46.06	42.99	14.47	36.55	13		rs6186316	8	90.02	0.03	0.07	0	1.05	0	0
ILMN_1240329	1500041N16Rik	8	87.6	rs13479825	8	86.07	Y	Y	26.11	38.3	12.62	36.18	13		rs6186316	8	90.02	2.78	2.56	0.26	0.32	0	0
ILMN_1222253	Neto2	8	88.19	rs13479825	8	86.07	Y	Y	39.52	35.53	24.36	33.78	13		rs6186316	8	90.02	0	2.22	2.85	1.69	0	0
ILMN_2594746	Btbd14b	8	87.19	rs13479825	8	86.07	Y	Y	20.5	44.09	35.64	32.78	15		rs6186316	8	90.02	1.06	0.24	0.18	0.02	0	0
ILMN_1230215	Trmt1	8	87.22	rs13479825	8	86.07	Y	Y	15.18	51.58	37.67	32.09	15		rs6186316	8	90.02	0.1	0.58	0.48	0.95	0	0
ILMN_2484987	Man2b1	8	87.62	rs3698182	8	86.48	Y	Y	8.21	22.03	16.81	26.32	5		rs6186316	8	90.02	2.01	0.07	0.48	0	0	0
ILMN_2773276	Nudt7	8	116.68	rs13479891	8	91.21	Y	N	27.17	1.64	0.27	1.06	2		rs13479905	8	91.56	0.01	3.64	5.68	0.04	0	0
ILMN_2678218	Mmp2	8	95.38	gnf08.091.954	8	93.54	Y	Y	5.77	30.31	2.14	16.14	3		rs3672711	8	93.01	21.63	20.86	15.83	9.63	0	0
ILMN_2427874	Capns2	8	95.43	gnf08.091.954	8	93.54	Y	Y	26.44	44.49	17.82	25.28	6		rs3672711	8	93.01	26.1	33.63	44.54	32.33	1	0
ILMN_2596713	Aktip	8	90.03	gnf08.091.954	8	93.54	Y	Y	24.33	58.02	22.04	46.85	10		rs3672711	8	93.01	7.7	14.69	5.01	8.91	0	0
ILMN_2604403	4933436C20Rik	8	94.85	gnf08.091.954	8	93.54	Y	Y	33.61	29.57	21.74	50.38	13		rs3672711	8	93.01	45.2	51.56	39.08	34.3	1	0
ILMN_1248257	Aytl1a	8	95.44	rs4227313	8	94	Y	Y	12.33	23.51	31.05	15.43	4		rs3677073	8	94.19	25.5	28.25	33.3	25.36	1	0
ILMN_1212927	LOC382040	8	131.27	rs3697596	8	130.72	Y	Y	18.77	34.71	11.91	26.6	10		rs6249615	8	130.09	0.49	2.45	1.4	1.69	0	0
ILMN_2589312	Entpd4	14	69.98	mCV25073238	9	10.53	N	N	3.86	14.04	12.91	28.9	5		rs6324914	9	11.64	0.06	5.49	1.12	0	0	0
ILMN_2554110	Entpd4	14	69.98	mCV25073238	9	10.53	N	N	10.01	19.36	11.33	26.34	5		rs6324914	9	11.64	2.3	0.26	2.31	0.06	0	0
ILMN_2440194	Kirrel3	9	34.56	rs6284286	9	33.96	Y	Y	37.05	38.45	38.92	32.6	1		rs6284286	9	34.01	43.76	37.57	42.92	36.32	1	1
ILMN_1260103	Hspa8	9	40.61	UT_9_35.918713	9	34.96	N	N	30.99	14.28	8.18	13.18	2		UT_9_35.918713	9	35.02	1.67	0.08	0.58	0.19	0	0
ILMN_2452219	C130027E04Rik	9	34.99	UT_9_35.918713	9	34.96	Y	Y	24.07	43.38	24.54	28.27	10		UT_9_35.918713	9	35.02	59	32.96	52.56	53.07	1	0
ILMN_2711754	Foxred1	9	35.02	UT_9_35.918713	9	34.96	Y	Y	22.44	48.8	27.58	51.58	15		UT_9_35.918713	9	35.02	37.96	44.41	38.66	38.51	1	0
ILMN_2418503	Hyls1	9	35.37	rs3023208	9	40.87	Y	N	16.35	28.78	4.79	10.88	3		rs13480151	9	39.93	5.91	0.67	0.31	1.04	0	0
ILMN_2522952	1500035H01Rik	9	44.58	rs13480162	9	43.08	Y	Y	27.04	27.08	10.43	17.62	6		rs13480151	9	39.93	0.82	1	2.56	0.04	0	0
ILMN_1216951	LOC382136	9	47.18	rs3673816	9	46.98	Y	Y	30.66	51.29	31.75	49.2	1		rs13480180	9	48.23	4.26	8.18	3.05	1.21	0	0
ILMN_1259289	Ttc12	9	48.87	gnf09.042.496	9	47.96	Y	Y	62.73	56.7	52.27	42.2	1		rs13480180	9	48.23	85.93	70.42	63.6	69.55	1	1
ILMN_2722864	Ncam1	9	49.33	UT_9_51.41601	9	49.16	Y	Y	14.33	32.69	12.86	30.51	10		gnf09.044.006	9	49.51	3.48	5.35	12.9	12.85	0	0
ILMN_1214157	Pih1d2	9	50.43	gnf09.044.659	9	50.12	Y	Y	32.82	33.76	18.69	19.45	6		rs13480188	9	50.38	42.5	52.72	32.54	55.55	1	0
ILMN_2609495	Alg9	9	50.65	gnf09.044.659	9	50.12	Y	Y	23.64	37.03	22.64	33.81	10		rs13480188	9	50.38	51.55	69.25	55.05	55.83	1	0
ILMN_1214173	Dixdc1	9	50.52	rs13480191	9	50.91	Y	Y	33.43	7.38	9.67	17.45	2		rs13480191	9	50.96	35.75	56.35	38.36	42.63	1	0
ILMN_3160411	9830163H01Rik	9	1	mCV23098764	9	51.47	Y	Y	9.58	29.19	2.6	10.43	3		mCV23098764	9	51.52	38.25	11.88	13.25	16.02	2	0
ILMN_1228489	Hmg20a	9	56.34	rs13480192	9	51.7	Y	Y	24.2	24.19	38.63	34.51	11		rs13480192	9	51.76	28.86	24.07	25.8	23.71	12	0
ILMN_2564650	Sin3a	9	56.96	rs13480201	9	53.59	Y	Y	27.51	53.76	38.7	52.64	1		rs13480204	9	54.09	60.03	54.96	44.88	60.33	1	1
ILMN_1245195	Tnfaip8l3	9	53.87	rs13480201	9	53.59	Y	Y	24.26	40.5	16.1	18.31	3		rs13480204	9	54.09	91.37	78.13	45.76	86.56	1	0
ILMN_2732576	Pml	9	58.07	rs3708863	9	57.37	Y	Y	38.24	29.86	20.99	4.63	6		rs3708863	9	57.42	48.27	56	35.52	49.02	1	0
ILMN_2754222	Rpp25	9	57.35	rs4227700	9	58.68	Y	Y	35.42	44.37	16.59	41.51	13		gnf09.052.894	9	58.51	62.53	47.16	47.75	51.42	1	0
ILMN_1227726	Dis3l	9	64.15	rs4227706	9	62.18	Y	Y	25.32	43.28	13.48	25.62	3		rs6172647	9	62.36	0.02	5.57	5.03	0.71	0	0
ILMN_2701778	Itga11	9	62.63	rs4227706	9	62.18	Y	Y	17.42	13.08	21.12	32.56	5		rs6172647	9	62.36	35.4	31.14	26.98	37.38	1	0
ILMN_2626694	9930021J03Rik	19	29.79	gnf09.058.846	9	64.41	N	N	3.98	0.02	1.7	32.46	5		rs3664300	9	64.3	0.47	0.95	0.01	0.12	0	0
ILMN_1236556	Zfp72	13	74.51	rs13480251	9	66.79	N	N	4.56	27.86	0.25	1.02	3		rs13480253	9	67.22	1.45	0.65	1.66	0.06	0	0
ILMN_2682103	Smg7	1	154.68	rs13480251	9	66.79	N	N	0.83	27.13	0.28	0.07	3		rs13480253	9	67.22	0.02	0.19	1.24	4.31	0	0
ILMN_2678431	Mns1	9	72.31	rs3703045	9	70.11	Y	Y	34.51	51.4	29.66	30.24	1		rs3703045	9	70.16	0.02	2.41	0.41	0.12	0	0
ILMN_1254736	Myo5a	9	75.07	rs13480279	9	74.3	Y	Y	31.14	30.24	29.17	36.15	1		rs3724833	9	74.74	24.6	43.51	33.04	23.4	12	0
ILMN_1251419	Mela	8	125.95	rs3724833	9	74.67	N	N	79.72	110.24	71.25	96.18	1		rs3724833	9	74.74	88.38	113.53	109.81	69.37	1	1
ILMN_2674407	Arpp19	9	74.91	rs3724833	9	74.67	Y	Y	5.76	34.34	5.05	17.33	3		rs3724833	9	74.74	33.46	51.47	50.35	26.28	1	0
ILMN_2652757	Elovl5	9	77.83	rs3724833	9	74.67	Y	Y	1.9	27.06	7.68	6.67	3		rs3724833	9	74.74	0.62	7.91	1	0.5	0	0
ILMN_2479359	Tmod3	9	75.35	rs3724833	9	74.67	Y	Y	22.53	26.09	16.76	15.61	3		rs3724833	9	74.74	0.05	1.12	3.74	2.25	0	0
ILMN_1236354	BC031353	9	74.8	rs13480288	9	77.19	Y	Y	10.09	36.92	10.61	8.27	3		rs13480291	9	77.78	40.95	39.69	39.07	46.24	1	0
ILMN_2645460	2410146L05Rik	9	78.23	rs6217039	9	77.98	Y	Y	23.35	28.21	18.59	30.01	10		rs13480291	9	77.78	0.99	0.47	0.33	0.68	0	0
ILMN_1216788	Slc17a5	9	78.38	rs6217039	9	77.98	Y	Y	33.45	29.97	14.33	32.57	13		rs13480291	9	77.78	0.33	1.07	0.13	0.02	0	0
ILMN_1242130	BC023892	9	85.22	rs3674339	9	85.29	Y	Y	11.02	31.97	17.12	8.08	3		rs3674339	9	85.39	2.24	3.39	0.27	1.67	0	0
ILMN_2714415	4922501C03Rik	9	87.12	rs3674339	9	85.29	Y	Y	21.74	20.26	47.08	32.58	11		rs3674339	9	85.39	0.01	0.98	1.04	0.02	0	0
ILMN_1230916	Morf4l1	9	90.1	rs3693091	9	90.2	Y	Y	44.8	70.11	45.73	45.68	1		rs3693091	9	90.3	90.26	91.52	93.55	83.73	1	1
ILMN_1246770	ILM103850315	4	1	rs3693091	9	90.2	N	N	13.03	30.79	15.61	4.69	3		rs3693091	9	90.3	0.12	0.63	0	1.34	0	0
ILMN_1223705	Mthfs	9	89.01	rs3693091	9	90.2	Y	Y	62.14	53.53	21.38	47.4	13		rs3693091	9	90.3	0.57	0.37	5.5	4.97	0	0
ILMN_1232779	Sfrp5	19	42.27	rs13480348	9	92.69	N	N	26.74	1.15	3	0.25	2		rs6292067	9	92.98	0.8	3.12	0	0	0	0
ILMN_2632976	Faim	9	98.89	rs3725272	9	94.96	Y	Y	21.02	32.14	3.41	3.58	3		rs3690580	9	95.25	4.6	0.01	0.01	0.03	0	0
ILMN_2691743	1600029I14Rik	9	99.37	rs13480365	9	98.39	Y	Y	12.95	36.1	7.56	23.33	3		CEL-9_98918429	9	98.98	1.8	4.25	0.58	0.59	0	0
ILMN_1236679	Armc8	9	99.41	rs13480365	9	98.39	Y	Y	39.73	33.12	7.31	20.61	6		CEL-9_98918429	9	98.98	0.47	3.12	0.25	1.03	0	0
ILMN_1242386	Ephb1	9	101.94	rs3658704	9	100.19	Y	Y	11.28	21.92	14.02	27.78	5		rs3722432	9	100.58	1.05	1.11	0.01	2.17	0	0
ILMN_2438221	Nphp3	9	103.92	rs13480387	9	103.78	Y	Y	34.16	47.65	31.91	39.05	1		rs3089531	9	101.79	0.34	0.08	0.44	3.52	0	0
ILMN_1220218	Mrpl3	9	104.97	rs13480387	9	103.78	Y	Y	37.49	42.12	40.37	40.48	1		rs3089531	9	101.79	0.13	1.27	0.24	1.35	0	0
ILMN_1231390	Mrpl3	9	104.96	rs13480387	9	103.78	Y	Y	27.12	11.92	22.47	34.99	8		rs3089531	9	101.79	1.2	1.67	1.28	0.53	0	0
ILMN_1231805	Pik3r4	9	105.59	rs13480387	9	103.78	Y	Y	34.23	40.43	29.2	21.26	12		rs3089531	9	101.79	2.19	0.32	0.51	0.02	0	0
ILMN_2730005	Rpl29	9	106.33	rs3657415	9	105.94	Y	Y	73.64	70.76	47.29	78.09	1		rs3089531	9	101.79	4.36	0.07	4.57	1.85	0	0
ILMN_1224719	Rpl129	9	106.33	rs3657415	9	105.94	Y	Y	48.21	65.93	27.43	70.91	1		rs3089531	9	101.79	0.7	0.09	1.2	0.02	0	0
ILMN_1224437	Ppm1m	9	106.1	rs3657415	9	105.94	Y	Y	22.59	33.64	21.23	9.75	3		rs3089531	9	101.79	0.11	1.96	0.16	0.62	0	0
ILMN_2774244	Abhd14b	9	106.36	rs3657415	9	105.94	Y	Y	25.36	26.11	16.47	24.14	3		rs3089531	9	101.79	1.88	4.84	1.33	1.97	0	0
ILMN_1245034	Rpl129	9	106.33	rs3657415	9	105.94	Y	Y	11.47	29.03	13.39	15.7	3		rs3089531	9	101.79	1.66	0.04	1.65	0.06	0	0
ILMN_2773286	Abhd14a	9	106.34	rs3657415	9	105.94	Y	Y	34.9	34.67	13.76	30.18	13		rs3089531	9	101.79	4.16	1.39	0.28	1.21	0	0
ILMN_2487453	Zfp93	7	25.06	rs3676408	9	107.69	N	N	30.27	1.01	0.01	0.28	2		D9Mit200	9	112.78	5.99	0.16	6.45	0.07	0	0
ILMN_2661799	6230427J02Rik	9	107.89	rs3676408	9	107.69	Y	Y	10.75	26.46	6.21	8.41	3		D9Mit200	9	112.78	0.88	0.61	7.23	1.73	0	0
ILMN_2762728	Acaa1	9	119.26	rs8254361	9	119.19	Y	Y	26.72	40.53	35.91	18.65	12		rs13480448	9	119.34	1.49	0.52	0.03	0.74	0	0
ILMN_2613175	5830454E08Rik	9	120.49	rs13480454	9	120.55	Y	Y	10.98	29.73	16.25	9.07	3		rs13480454	9	120.61	18.92	26.36	20.14	22.9	3	3
ILMN_1224580	4932415A06Rik	9	121.01	D9Mit151	9	121.33	Y	Y	43.36	35.09	32.34	26.64	1		rs13459114	9	121.83	1.44	0.09	0.94	0.43	0	0
ILMN_2418210	BC030045	9	121.68	D9Mit151	9	121.33	Y	Y	31.02	17.32	27.9	15.69	7		rs13459114	9	121.83	2.35	0.12	0.04	0.55	0	0
ILMN_1217631	Zfp445	9	122.77	rs6299531	9	122.77	Y	Y	13.3	35.26	15.31	19.47	3		rs13480459	9	122.18	9.38	1.01	0.2	0.01	0	0
ILMN_1227126	Ppp2r3a	9		rs8254393	9	123.81	Y	Y	15.78	25.63	16.83	36.33	5		rs13480459	9	122.18	4.61	0.38	0.28	0.66	0	0
ILMN_2485055	Wwox	8	117.88	rs8254393	9	123.81	N	N	14.65	34.17	23.82	29.25	10		rs13480459	9	122.18	0.07	0.15	0.7	0.02	0	0
ILMN_2753096	Zfand3	17	30.35	rs3721803	10	3.34	N	N	28.62	0.41	1.43	0.35	2		gnf10.004.219	10	3.09	2.48	5.6	0.84	0.72	0	0
ILMN_2619594	Il11ra1	4	41.72	rs3721803	10	3.34	N	N	27.58	0.04	0.42	0.62	2		gnf10.004.219	10	3.09	1.02	13.97	0.66	0.33	0	0
ILMN_2685275	Tmem109	19	10.95	rs3721803	10	3.34	N	N	27.46	0.31	0.26	1.42	2		gnf10.004.219	10	3.09	0.05	0	0.54	0.74	0	0
ILMN_1223523	A930025D01Rik	2	130.24	rs3721803	10	3.34	N	N	27.03	1.07	2	2	2		gnf10.004.219	10	3.09	3.35	4.07	0.59	1.3	0	0
ILMN_1227686	Prrx1	1	165.18	rs3721803	10	3.34	N	N	0.02	0.26	0.21	26.06	5		gnf10.004.219	10	3.09	2.57	1.09	0.15	1.07	0	0
ILMN_1252673	Cugbp2	2	6.46	rs4228112	10	12.7	N	N	29.52	0.76	1.32	2.88	2		rs6171150	10	12.77	9.47	0.45	1.12	0.42	0	0
ILMN_2615837	Cstf3	2	104.51	rs4228112	10	12.7	N	N	26.22	0.3	0.44	2.65	2		rs6171150	10	12.77	5.96	3.07	2.84	1.23	0	0
ILMN_1244913	Ryr2	13	11.65	rs4228112	10	12.7	N	N	26.16	0.44	2.27	3.65	2		rs6171150	10	12.77	5.99	3.13	0	1.05	0	0
ILMN_1227386	Aig1	10	13.37	rs4228112	10	12.7	Y	Y	32.58	14.37	19.03	34.39	8		rs6171150	10	12.77	18.7	15.47	5.37	12.61	0	0
ILMN_1249698	Wbp2	11	115.94	rs4228121	10	13.38	N	N	5.2	0.94	0.43	26.04	5		rs3658786	10	13.85	0.51	0.09	1.6	1.26	0	0
ILMN_1239724	Psmb1	17	15.61	CEL-10_14286032	10	14.26	N	N	28.73	0.18	5.25	0.03	2		rs3680457	10	14.14	6.52	4.68	3.7	5.11	0	0
ILMN_2453874	Sdcbp	4	6.32	CEL-10_14286032	10	14.26	N	N	26.77	0.05	3.19	4.83	2		rs3680457	10	14.14	0.14	0.08	1.65	0	0	0
ILMN_1213534	Ssbp2	13	91.81	CEL-10_14286032	10	14.26	N	N	7.98	17.38	15	31.92	5		rs3680457	10	14.14	0.23	3.69	0.2	0.07	0	0
ILMN_1247145	Bclaf1	10	20.05	rs13480527	10	19.31	Y	Y	11.71	35.68	17.7	20.07	3		rs13480529	10	19.82	1.18	0.66	0.75	4.63	0	0
ILMN_1233535	C6orf174	10	28.92	rs6332670	10	28.47	Y	Y	71.48	86.53	55.65	68.63	1		rs13480560	10	27.28	2.09	1.37	0.15	0.51	0	0
ILMN_2507044	Hcfc2	10	82.2	rs13480630	10	67.22	Y	N	29.41	5.31	5.03	0.77	2		rs13480631	10	67.46	0.19	0.53	0.04	2.65	0	0
ILMN_1224207	Plekhk1	10	67.5	rs13480630	10	67.22	Y	Y	10.36	32.83	3.24	5.16	3		rs13480631	10	67.46	9.2	15.59	19.78	17.77	0	0
ILMN_2474128	Zfp365	10	67.35	rs13480630	10	67.22	Y	Y	45.14	49.53	31.32	18.19	12		rs13480631	10	67.46	51.78	70.3	45.78	46.01	1	0
ILMN_1212806	Plekhk1	10	67.52	rs3712063	10	67.49	Y	Y	18.54	25.1	27.51	30.7	11		rs3712063	10	67.55	37.55	44.79	43.22	36.76	1	0
ILMN_1233726	Rtkn2	10	67.51	rs3712063	10	67.49	Y	Y	37.94	46.06	18.62	34.31	13		rs3712063	10	67.55	66.42	65.53	51.7	45.86	1	0
ILMN_1230139	Zfp365	10	67.36	rs13480638	10	68.84	Y	Y	7.06	26.39	3.04	2.99	3		rs3679735	10	68.84	6.29	5.54	17.19	12.12	0	0
ILMN_2732627	Polr3b	10	84.19	rs13480650	10	73.32	Y	N	10.09	26.29	3.27	3.39	3		rs13480653	10	74.44	1.38	0.15	0.19	0.42	0	0
ILMN_2543507	1190007I07Rik	10	82.08	gnf10.081.801	10	82.25	Y	Y	26.83	30.25	19.18	23.91	6		D10Mit42	10	82.12	0.23	0	2.46	1.5	0	0
ILMN_3162570	Gnptab	10	87.91	CEL-10_87391383	10	87.07	Y	Y	27.28	31.53	22.09	38.35	13		rs13480700	10	89.97	0.03	0	0.66	1.63	0	0
ILMN_1212623	C12orf63	10	92.52	rs6191721	10	91.35	Y	Y	18.22	41.95	24.92	14.59	3		rs13480703	10	90.88	0.04	0.59	0.07	2.15	0	0
ILMN_1240161	Gns	10	120.81	rs6197175	10	120.1	Y	Y	19.77	27.68	18.55	24.24	3		rs6197175	10	120.13	1.43	3.36	1.67	0.01	0	0
ILMN_2505061	A730063M14Rik	10	126.51	rs13480819	10	126.41	Y	Y	12.51	20.03	8.24	28.71	5		rs13480822	10	127.18	56.96	59.81	36.59	54.37	1	0
ILMN_2627140	9830001H06Rik	2	156.84	rs3659787	11	4.41	N	N	13.19	7.74	8.52	26.28	5		rs6163251	11	5.86	0.02	0.31	0	0.24	0	0
ILMN_1243695	Cwf19l1	19	44.18	rs3707185	11	19.88	N	N	33.72	0.05	0.13	0.8	2		rs3707185	11	19.88	0.35	0.21	0.36	0.23	0	0
ILMN_2648648	Bnip1	17	26.93	rs3707185	11	19.88	N	N	27.66	1.62	0	1.22	2		rs3707185	11	19.88	5.66	0.01	0.16	1.15	0	0
ILMN_1245858	Epb4.1	4	131.48	rs3707185	11	19.88	N	N	26.23	0.28	1.46	3.12	2		rs3707185	11	19.88	0.8	3.18	0.03	0.82	0	0
ILMN_1225889	Ints10	8	71.35	rs3707185	11	19.88	N	N	26.06	0.97	0.02	2.41	2		rs3707185	11	19.88	0.64	0.23	0.03	0.15	0	0
ILMN_2736976	1700093K21Rik	11	23.42	rs3023251	11	20.85	Y	Y	19	21.97	27.28	22.19	4		rs3707185	11	19.88	0.62	0.83	8.53	2.2	0	0
ILMN_1220311	Vrk2	11	26.45	rs3677232	11	24.57	Y	Y	27.19	15.16	7.75	12.54	2		gnf11.023.736	11	24.51	12.29	17.42	18.11	12.14	0	0
ILMN_2694055	4921513D23Rik	16	14.11	rs3677232	11	24.57	N	N	26.61	13.7	4.84	10.28	2		gnf11.023.736	11	24.51	0.52	0.54	0.5	0.52	0	0
ILMN_2516801	LOC67660	11	26.29	rs3677232	11	24.57	Y	Y	20.14	27.21	11.39	34.04	10		gnf11.023.736	11	24.51	2.69	0.19	0.96	2.82	0	0
ILMN_1243625	Ccdc88a	11	28.47	rs13480929	11	28.1	Y	Y	50.24	70.15	57.61	75.88	1		rs3720425	11	29.13	6.88	12.37	6.85	6.72	0	0
ILMN_2747687	Mpg	11	32.13	rs13480929	11	28.1	Y	Y	13.96	30.77	10.49	9.13	3		rs3720425	11	29.13	0.02	0.58	0.1	0.91	0	0
ILMN_2673980	Hbq1	11	32.2	rs13480932	11	28.98	Y	Y	58.66	57.86	35.17	50.66	1		rs3720425	11	29.13	45.73	48.16	52.02	40.81	1	1
ILMN_2432780	Rtn4	11	29.64	rs13480932	11	28.98	Y	Y	45.73	63.17	52.6	52.13	1		rs3720425	11	29.13	0.94	2.13	0.13	6.52	0	0
ILMN_2497293	Mtif2	11	29.43	rs13480932	11	28.98	Y	Y	52.49	64.01	28.57	61.97	1		rs3720425	11	29.13	1.06	1.4	0.06	0.28	0	0
ILMN_1255765	Mtif2	11	29.44	rs13480932	11	28.98	Y	Y	18.53	28.2	5.63	7.71	3		rs3720425	11	29.13	0.53	0.64	0	0.31	0	0
ILMN_1242778	C230094A16Rik	11	29.64	rs13480932	11	28.98	Y	Y	15.48	25.36	22.06	26.25	5		rs3720425	11	29.13	1.33	0.08	0.4	4.61	0	0
ILMN_1236180	Mtif2	11	29.43	rs13480932	11	28.98	Y	Y	45.96	54.06	19.73	43.01	13		rs3720425	11	29.13	1.43	0	0.19	1.91	0	0
ILMN_1219050	Etl4	2	20.63	gnf11.035.919	11	34.98	N	N	1.37	0.6	0.56	26.16	5		rs13480954	11	34.13	1.7	0.31	0.46	1.61	0	0
ILMN_1237003	Slu7	11	43.25	rs3706713	11	42.87	Y	Y	32.29	28.62	37.1	36.43	1		rs13480954	11	34.13	1.15	1.22	0.08	0.51	0	0
ILMN_2675587	Ublcp1	11	44.27	D11Mit20	11	44.58	Y	Y	26.85	49.88	30.57	16.81	12		gnf11.055.501	11	53.73	0.84	1.07	0	0.15	0	0
ILMN_1223035	Slc22a4	11	53.8	rs6199956	11	50.59	Y	Y	31.7	25.31	22.71	31.98	8		gnf11.055.501	11	53.73	101.87	102.52	91.92	100.1	1	0
ILMN_1228123	Tnip1	11	54.75	rs13481023	11	51.85	Y	Y	26.01	17.66	30.11	25.4	7		gnf11.055.501	11	53.73	31.58	25.18	14.24	21.62	6	0
ILMN_1232976	1810073G14Rik	11	57.3	rs3088940	11	56.36	Y	Y	1.93	26.08	4.19	14.9	3		rs3715495	11	56.84	0.6	0.13	0.19	0.01	0	0
ILMN_1259564	Iigp2	11	58.04	rs3023260	11	57.09	Y	Y	12.36	26.27	14.61	15.74	3		rs3715495	11	56.84	0.98	0	2.69	1.2	0	0
ILMN_1243212	Sparc	11	55.21	rs3023260	11	57.09	Y	Y	32	30.4	20.07	20.62	6		rs3715495	11	56.84	73.1	88.46	75.54	95.59	1	0
ILMN_2500491	Lyrm7	11	54.65	rs3023260	11	57.09	Y	Y	28.6	26.4	20.49	23.51	6		rs3715495	11	56.84	90.37	89.34	80.48	64.19	1	0
ILMN_1251423	2010001A14Rik	11	57.61	rs3023260	11	57.09	Y	Y	27.62	37.1	24.98	28.21	13		rs3715495	11	56.84	41.41	46.5	51.48	60.4	1	0
ILMN_2673274	Safb	17	56.75	rs6344645	11	58.93	N	N	26.6	2.72	0.04	0.91	2		rs6245211	11	59.14	1.49	0.31	0.55	0	0	0
ILMN_2546624	Ndel1	11	68.64	rs3677986	11	67.96	Y	Y	61.3	64.73	55.31	56	1		rs13481081	11	67.96	41.19	43.5	35.43	30.65	1	1
ILMN_2732649	Tmem107	11	68.89	rs3677986	11	67.96	Y	Y	15.95	32.72	15.92	14.79	3		rs13481081	11	67.96	2.55	3.89	0.94	0.05	0	0
ILMN_2665478	Alox8	11	69	rs3677986	11	67.96	Y	Y	26.16	41.65	14.23	10.54	6		rs13481081	11	67.96	20.65	59.93	28.66	19.12	9	0
ILMN_2645473	2011-02-02	11	69.44	rs3677986	11	67.96	Y	Y	31.59	33.95	17.45	22.6	6		rs13481081	11	67.96	0.99	0.75	2.27	6.13	0	0
ILMN_2730784	Gps2	11	69.73	D11Mit219	11	72.14	Y	Y	95.84	84.06	39.41	42.57	1		rs13481093	11	72.36	2.24	5.16	0.05	0.56	0	0
ILMN_2492170	Tnfsf13	11	69.5	D11Mit219	11	72.14	Y	Y	32.23	57.88	32.53	39.58	1		rs13481093	11	72.36	9.8	10.96	8.93	9.76	0	0
ILMN_2482949	Pitpnm3	11	71.88	D11Mit219	11	72.14	Y	Y	25.93	34.34	22.97	16.7	3		rs13481093	11	72.36	27.63	28.44	23.03	24.02	13	0
ILMN_2594139	6330403K07Rik	11	70.85	D11Mit219	11	72.14	Y	Y	20.73	30.22	19.74	21.54	3		rs13481093	11	72.36	5.56	1.23	2.51	11.11	0	0
ILMN_2757569	Eno3	11	70.48	D11Mit219	11	72.14	Y	Y	14.96	29.47	18.54	23.44	3		rs13481093	11	72.36	3.59	2.99	1.13	8.29	0	0
ILMN_2710764	Dlg4	11	69.86	D11Mit219	11	72.14	Y	Y	28.25	36.09	18.75	24.59	6		rs13481093	11	72.36	0.32	4.19	2.41	1.77	0	0
ILMN_2421751	Kif1c	11	70.54	D11Mit219	11	72.14	Y	Y	36.38	24.5	25.21	31.53	8		rs13481093	11	72.36	0	0.03	0.16	0.42	0	0
ILMN_2775586	Acadvl	11	69.82	D11Mit219	11	72.14	Y	Y	31.74	49.27	23.24	28.17	13		rs13481093	11	72.36	5.74	1.48	0.13	0.12	0	0
ILMN_2700848	Arrb2	11	70.25	D11Mit219	11	72.14	Y	Y	29.06	34.45	25.72	28.16	13		rs13481093	11	72.36	6.17	0.62	0.43	0.58	0	0
ILMN_2498108	Zzef1	11	72.74	rs6217738	11	72.49	Y	Y	46.49	60.29	53.39	39.64	1		rs13481093	11	72.36	2.34	0.32	3.02	4.89	0	0
ILMN_1231062	Zzef1	11	72.74	rs6217738	11	72.49	Y	Y	42.1	56.54	36.6	30.01	1		rs13481093	11	72.36	2.45	0.12	0.36	1.23	0	0
ILMN_1233283	P2rx5	11	72.99	rs6217738	11	72.49	Y	Y	14.18	37.05	18.06	22.57	3		rs13481093	11	72.36	19.22	16.86	24.53	19.1	4	0
ILMN_1217629	Itgae	11	72.96	rs6217738	11	72.49	Y	Y	20.08	28.37	16.03	17.89	3		rs13481093	11	72.36	45.12	64.77	56.96	66.59	1	0
ILMN_1239174	Glod4	11	76.06	rs13481099	11	73.93	Y	Y	39.94	45.8	27.2	24.46	12		rs13481093	11	72.36	0.14	0.47	0.06	0.01	0	0
ILMN_1235678	Rps6kb1	11	86.33	D11Mit178	11	84.99	Y	Y	9.59	27.56	7.59	4.36	3		rs3661657	11	84.55	29.45	10.28	13.85	18.01	2	0
ILMN_1239717	Expi	11	83.52	D11Mit178	11	84.99	Y	Y	23.46	28.37	19.07	20.57	3		rs3661657	11	84.55	1.37	12.57	14.94	10.73	0	0
ILMN_1252622	Aatf	11	84.28	D11Mit178	11	84.99	Y	Y	10.62	26.95	8.99	9.34	3		rs3661657	11	84.55	3.27	0.17	2.32	0.01	0	0
ILMN_1242177	C230094I18Rik	11	83.63	D11Mit178	11	84.99	Y	Y	21.92	34.15	18.14	35.04	10		rs3661657	11	84.55	12.9	14.24	17.54	25.01	5	0
ILMN_1258600	Acaca	11	84.22	D11Mit178	11	84.99	Y	Y	31.39	38.41	16.07	33.67	13		rs3661657	11	84.55	3.64	0.06	0.03	0.01	0	0
ILMN_1229454	Cuedc1	11	88.01	rs3720112	11	87.67	Y	Y	32.9	55.32	32.65	41.11	1		rs13481145	11	88.25	130.57	128.76	129.55	137.15	1	1
ILMN_1234842	Msi2	11	88.18	rs3720112	11	87.67	Y	Y	28.33	25.35	17.88	21.08	2		rs13481145	11	88.25	64.65	64.84	65.55	54.53	1	0
ILMN_2746870	Nog	11	89.16	rs3659504	11	88.48	Y	Y	20.69	39.42	22.26	20.58	3		rs3659504	11	88.52	39.54	28.85	24.78	30.94	1	0
ILMN_1221218	LOC327995	11	88.57	rs3659504	11	88.48	Y	Y	13.3	28.25	35.07	24.34	9		rs3659504	11	88.52	4.41	7.48	12.04	8.89	0	0
ILMN_2625736	B130006D01Rik	11	95.59	rs13481170	11	95.44	Y	Y	21.64	36.13	20.41	38.71	10		rs6247550	11	95.91	85.56	97.08	88.86	118.41	1	0
ILMN_1250569	Rapgefl1	11	98.71	rs13481180	11	98.58	Y	Y	17.62	41.41	12.44	22.5	3		mCV25379202	11	99.3	98.53	87.3	71.02	95.89	1	0
ILMN_2687011	Krt12	11	99.28	rs13481180	11	98.58	Y	Y	37.88	50.41	24.06	34.41	13		mCV25379202	11	99.3	78.93	68.14	69.75	60.75	1	0
ILMN_2518744	Wnk4	11	101.14	mCV22971719	11	101.07	Y	Y	18.03	33.14	18.62	14.54	3		gnf11.108.381	11	100.63	1.53	0.13	0	0.1	0	0
ILMN_1242093	Asb16	11	102.14	rs13481194	11	101.42	Y	Y	23.36	26.11	12.47	10.5	3		rs8265673	11	102.22	1.03	0.5	0.36	1.21	0	0
ILMN_1218934	Rdm1	11	101.5	rs13481194	11	101.42	Y	Y	26.97	41.81	13.05	35.44	13		rs8265673	11	102.22	0.04	0	0.07	0.2	0	0
ILMN_2662595	Mpp3	11	101.86	rs3709793	11	102.73	Y	Y	7.42	29.34	15.08	18.25	3		rs13481201	11	103.04	0.12	0.05	0.03	0	0	0
ILMN_2778111	Etv4	11	101.63	rs13481201	11	102.99	Y	Y	12.49	27.1	13.07	8	3		rs13481201	11	103.04	0.75	0.76	1.81	0.64	0	0
ILMN_2568767	Tanc2	11	105.7	rs3658778	11	104.84	Y	Y	24.6	35.18	37.92	21.44	9		rs3698446	11	105.1	45.03	39.58	40.05	44.34	1	0
ILMN_2725698	Cacng5	11	107.74	rs13481215	11	106.95	Y	Y	38.24	48.25	50.69	49.5	1		rs13481215	11	106.99	17.74	28.43	31.15	32.23	15	0
ILMN_1250689	Rgs9	11	109.09	rs3669823	11	107.78	Y	Y	29.66	41.83	19.3	16.28	6		rs3669823	11	107.83	21.69	32.07	22.08	20.82	3	0
ILMN_1252144	Mif4gd	11	115.47	rs13481243	11	114.49	Y	Y	16.87	30.11	13.77	28.9	10		rs13481243	11	114.53	25.29	30.39	33.25	22.97	12	0
ILMN_2466797	Mfsd11	11	116.67	rs13481249	11	116.36	Y	Y	31.95	39.9	7.27	17.38	6		rs6364987	11	115.91	0.27	0.67	0.16	0.74	0	0
ILMN_1248727	Pscd1	11	117.99	rs13481251	11	116.86	Y	Y	24.52	28.5	11.66	20.39	3		rs6364987	11	115.91	0.39	5	0.11	0.05	0	0
ILMN_2740738	Slc7a11	3	50.18	CEL-11_121219118	11	121.36	N	N	2.33	4.55	10.94	31.37	5		CEL-11_120628029	11	120.82	2.5	0.87	0.5	0.16	0	0
ILMN_2610600	Smarce1	11	99.07	rs13481305	12	12.82	N	N	0.23	0.34	1.45	29.31	5		rs13481305	12	12.8	0.03	0.38	0.34	0.09	0	0
ILMN_1225291	ILM100770333	12		rs3657682	12	15.76	Y	N	54.09	43.32	36.26	43.6	1		rs13481316	12	15.56	3.89	6.08	8.2	6.44	0	0
ILMN_1229343	Mboat2	12	25.64	gnf12.013.284	12	15.98	Y	N	81.11	89.31	62.27	58.08	1		rs13481319	12	16.15	39.96	40.64	64.11	35.68	1	1
ILMN_1243942	Adam17	12	21.33	gnf12.013.284	12	15.98	Y	N	65.75	67.06	41.71	58.75	1		rs13481319	12	16.15	36.06	38.9	54.11	39.44	1	1
ILMN_2608903	2900060N12Rik	12		gnf12.013.284	12	15.98	Y	N	41.71	59.91	44.32	44.01	1		rs13481319	12	16.15	48.32	50.18	71.02	44.39	1	1
ILMN_2669361	Fggy	4	95.59	gnf12.013.284	12	15.98	N	N	88.2	101.63	70.66	98.65	1		rs13481319	12	16.15	50.93	50.55	61.69	42.95	1	1
ILMN_2758803	1700019G17Rik	6	85.85	gnf12.013.284	12	15.98	N	N	73.58	76.65	50.16	68.36	1		rs13481319	12	16.15	32.36	41.35	40.92	35.78	1	1
ILMN_1226990	D130017D19Rik	12	19.75	gnf12.013.284	12	15.98	Y	Y	29.24	47.55	28.45	46.73	1		rs13481319	12	16.15	2.56	0.64	7.19	1.97	0	0
ILMN_1244260	Atp6v1c2	12	17.29	gnf12.013.284	12	15.98	Y	Y	32.26	19.71	6.98	14.94	2		rs13481319	12	16.15	41.77	35.28	41.64	27.15	1	0
ILMN_2594718	Adam17	12	21.33	gnf12.013.284	12	15.98	Y	N	23.12	40.03	18.05	8.58	3		rs13481319	12	16.15	33.7	33.55	38.4	21.11	12	0
ILMN_2509674	1700030C10Rik	12	20.81	gnf12.013.284	12	15.98	Y	Y	23.18	34.31	14.47	22.17	3		rs13481319	12	16.15	17.56	26.13	20.18	14.09	3	3
ILMN_2735046	Cml3	6	85.76	gnf12.013.284	12	15.98	N	N	4.89	31.7	8.61	6.1	3		rs13481319	12	16.15	0.46	5.37	0.4	0.69	0	0
ILMN_1214848	Mboat2	12	25.56	gnf12.013.284	12	15.98	Y	N	36.66	57.46	22.71	19.68	6		rs13481319	12	16.15	10.11	14.79	13.83	12.63	0	0
ILMN_1241341	LOC385780	16	19.65	gnf12.013.284	12	15.98	N	N	30.7	26.24	14.29	15.99	6		rs13481319	12	16.15	3.07	0.2	2.31	2.47	0	0
ILMN_1256181	Nol10	12	17.42	gnf12.013.284	12	15.98	Y	Y	29.47	18.95	36.98	18.9	7		rs13481319	12	16.15	25.14	28.24	36.91	31.23	1	0
ILMN_2657243	Kcnf1	12	17.18	gnf12.013.284	12	15.98	Y	Y	31.41	36.45	28.25	24.14	12		rs13481319	12	16.15	32.25	23.6	30.32	24.32	14	0
ILMN_1233752	Mboat2	12	25.57	gnf12.013.284	12	15.98	Y	N	32.92	68.46	26.37	16.81	12		rs13481319	12	16.15	17.54	16.91	10.88	9.09	0	0
ILMN_2772515	Hpcal1	12	17.8	gnf12.013.284	12	15.98	Y	Y	20.97	29.48	30.65	29.63	15		rs13481319	12	16.15	33.23	39.61	39.67	35.73	1	0
ILMN_2468982	3110053B16Rik	12	20.88	rs3665818	12	26.07	Y	N	25.6	26.93	25.47	21.64	3		rs13481352	12	25.99	31.76	19.38	28.17	28.97	14	0
ILMN_2502614	Ttc15	12	29.38	rs13481364	12	28.86	Y	Y	57.19	72.32	55.37	83.71	1		rs3708704	12	29.11	119.01	123.82	102.26	140.89	1	1
ILMN_1246871	Ttc15	12	29.39	rs13481364	12	28.86	Y	Y	78.38	77.52	43.9	52.09	1		rs3708704	12	29.11	113.23	121.6	98.66	115.5	1	1
ILMN_2449985	Snrpf	10	93.05	rs13481388	12	35.35	N	N	0.21	1.09	2.42	27.64	5		rs13481388	12	35.45	3.05	0.75	0.82	0.04	0	0
ILMN_1226684	Dock4	12	41.17	gnf12.035.312	12	37.38	Y	Y	25.79	31.09	16.89	16.01	3		rs6390300	12	36.77	43.62	34.43	25.27	45.24	1	0
ILMN_1234694	Zfp277	12	41.04	gnf12.035.312	12	37.38	Y	Y	25.85	29.94	4.69	23.55	3		rs6390300	12	36.77	32.42	31.47	35.69	32.84	1	0
ILMN_2470508	9630013D21Rik	4	109.32	gnf12.035.312	12	37.38	N	N	0.69	0.7	0.53	26.48	5		rs6390300	12	36.77	0	0.57	3.61	0.24	0	0
ILMN_2534332	LOC194913	12	18.44	gnf12.035.312	12	37.38	Y	N	35.64	36.36	14.35	38.93	13		rs6390300	12	36.77	42.72	53.8	47.41	46.32	1	0
ILMN_1252156	Dock4	12	41.19	rs13481399	12	39.33	Y	Y	47.92	64.35	52.83	26.67	1		rs13481399	12	39.54	60.84	58.57	58.84	61.07	1	1
ILMN_1229656	Nrcam	12	45.65	rs13481399	12	39.33	Y	N	77.79	100.12	65.15	81.35	1		rs13481399	12	39.54	70.99	66.57	62.47	70.3	1	1
ILMN_1240336	Nrcam	12	45.65	rs13481399	12	39.33	Y	N	37.07	79.81	47.01	56.4	1		rs13481399	12	39.54	33.61	31.93	27.58	46.17	1	1
ILMN_1242333	Immp2l	12	42.8	rs13481410	12	41.35	Y	Y	30.35	18.19	25.61	29.02	8		rs13481405	12	40.56	25.49	33.9	29.61	35.55	1	0
ILMN_1253395	ENSMUST00000075405.3	12	67.6	rs13481410	12	41.35	Y	Y	19.7	34.36	13.7	26.42	10		rs13481405	12	40.56	44.35	52.94	44.14	46.78	1	0
ILMN_1212812	Pla2g2e	4	138.44	rs13481462	12	55.56	N	N	0.07	26.66	3.46	0.03	3		gnf12.052.766	12	55.55	4.15	0.74	0.1	2.71	0	0
ILMN_1243477	Mipol1	12	58.43	rs13481466	12	56.92	Y	Y	19.34	44.3	26.03	31.11	15		rs13481471	12	58	74.69	67.33	44.58	60.65	1	0
ILMN_2728465	Sstr1	12	59.31	rs3705833	12	58.87	Y	Y	14.49	32.14	44.49	22.69	9		rs3717784	12	59.13	48.1	68.66	53.49	55.66	1	0
ILMN_1253773	Nudt6	3	37.3	rs3716547	12	68.49	N	N	22.29	14.12	28.52	14.77	4		rs3716547	12	68.67	0.71	1.19	1.74	0.34	0	0
ILMN_1246118	Trim9	12	71.35	rs13481514	12	70.52	Y	Y	44.53	84.13	68.52	74.3	1		rs3716547	12	68.67	0.04	0.5	0.74	2.71	0	0
ILMN_1216281	Map4k5	12	70.91	rs13481514	12	70.52	Y	Y	27.43	20.16	17.53	18.53	2		rs3716547	12	68.67	0.11	0.9	0.68	1.72	0	0
ILMN_2460491	Slc39a9	12	81.78	rs13481565	12	84.67	Y	Y	40	46.98	25.46	34.53	13		CEL-12_77300077	12	83.1	4.29	0.03	0.74	6.66	0	0
ILMN_1237030	LOC380770	12	83.27	rs13481566	12	85.42	Y	Y	38.6	47.99	28.24	25.6	12		CEL-12_77300077	12	83.1	0.01	0.08	3.02	0.26	0	0
ILMN_2765834	Lrrc42	4	106.91	rs13481580	12	89.42	N	N	0.29	31.59	0.37	0.61	3		CEL-12_77300077	12	83.1	0.31	0.49	0.01	1.4	0	0
ILMN_2732996	Gpr68	12	102.12	rs13481611	12	99.98	Y	Y	30.09	19.54	12.95	13.61	2		rs13481630	12	106.75	2.34	4.57	0.01	0.66	0	0
ILMN_1237980	Ccdc88c	12	102.21	rs6177548	12	100.35	Y	Y	24.38	39.42	19.38	21.04	3		rs13481630	12	106.75	0	0.15	0.84	0.07	0	0
ILMN_2618488	C630007B19Rik	6	96.6	D12Mit231	12	100.97	N	N	14.22	26.77	17.94	10.67	3		rs13481630	12	106.75	0.78	2.04	2.3	0.13	0	0
ILMN_1246800	Serpina3n	12	105.65	rs8273308	12	104.8	Y	Y	64.12	59.12	46.19	53.58	1		rs13481630	12	106.75	3.12	1.93	2.63	2.44	0	0
ILMN_2681001	AI132487	12	110.09	rs3663172	12	108.35	Y	Y	39.9	44.14	33.27	36.01	1		rs13481636	12	108.79	1.59	1.41	2.07	0.17	0	0
ILMN_1214866	Eml1	12	109.78	rs3663172	12	108.35	Y	Y	26.23	32.32	23.66	31.36	13		rs13481636	12	108.79	1.38	0.61	0.7	1.81	0	0
ILMN_2661520	Rage	12	112.07	CEL-12_104545022	12	110.24	Y	Y	28.49	18.31	16.88	25.1	2		rs13481636	12	108.79	1.54	1.18	0	0	0	0
ILMN_2615380	A530050D06Rik	12	113.37	D12Mit280	12	111.63	Y	Y	19.25	28.11	11.08	9.17	3		rs13481658	12	114.39	0.96	0.97	0.12	4.18	0	0
ILMN_1259342	Kif26a	12	113.42	D12Mit280	12	111.63	Y	Y	6.08	36.24	24.65	22.71	3		rs13481658	12	114.39	9.24	0.3	0.25	0.02	0	0
ILMN_2437682	2810029C07Rik	12	112.81	D12Mit280	12	111.63	Y	Y	12.28	33.99	20.35	20.76	3		rs13481658	12	114.39	2.41	2.78	0.51	1.03	0	0
ILMN_2671411	Klc1	12	113.03	D12Mit280	12	111.63	Y	Y	22.93	31.18	13.76	17.89	3		rs13481658	12	114.39	0.69	0.07	0.02	1.24	0	0
ILMN_2547762	2810002N01Rik	12	112.95	D12Mit280	12	111.63	Y	Y	8.22	31.04	2.96	6.07	3		rs13481658	12	114.39	0.43	0.81	0.05	0.2	0	0
ILMN_2732634	Cspg5	9	110.16	rs3701757	13	15.98	N	N	0.05	0.03	5.03	26.55	5		rs6180409	13	16.2	0.16	3.62	0.41	0.37	0	0
ILMN_2749935	C7orf10	13	17.34	D13Mit57	13	16.78	Y	Y	83.23	63.99	46.43	66.07	1		rs6349338	13	17.58	29.57	29.61	35.65	29.44	1	1
ILMN_2598775	Stard3nl	13	19.45	D13Mit57	13	16.78	Y	Y	26.38	17.3	11.63	9.43	2		rs6349338	13	17.58	31.73	29.89	36.95	26.66	1	0
ILMN_2525565	Hist1h4f	13	23.64	rs3714148	13	19.91	Y	Y	36.79	17.15	21.6	8.67	2		rs6314295	13	20.21	36.9	16.29	28.58	37.1	14	0
ILMN_2719202	Hist1h2bf	13	23.67	rs3714148	13	19.91	Y	Y	33.56	10.26	7.82	14.85	2		rs6314295	13	20.21	0.32	0.1	0.09	0.59	0	0
ILMN_2716195	Hist1h2bh	13	23.64	rs3714148	13	19.91	Y	Y	27.95	6.71	7.93	6.19	2		rs6314295	13	20.21	1	0.71	0.02	1.5	0	0
ILMN_2500491	Lyrm7	11	54.65	rs3714148	13	19.91	N	N	36.24	13.52	4.36	6.66	2		rs6314295	13	20.21	0.01	0.2	0.11	0.01	0	0
ILMN_1223035	Slc22a4	11	53.8	rs3714148	13	19.91	N	N	28.95	16.68	7.69	12.25	2		rs6314295	13	20.21	0	0.09	0.03	0.1	0	0
ILMN_1222313	Hist1h4f	13	23.64	rs3714148	13	19.91	Y	Y	31.1	15.85	18.86	34.78	8		rs6314295	13	20.21	21.49	38.61	29.22	20.1	9	0
ILMN_1230265	Hist1h4a	13	23.85	rs3714148	13	19.91	Y	Y	25.64	28.02	10.38	28.33	10		rs6314295	13	20.21	27.72	17	41.64	22.05	7	0
ILMN_2774537	Hist1h1c	13	23.83	rs3714148	13	19.91	Y	Y	27.53	45.27	17.77	32	13		rs6314295	13	20.21	1.35	4.45	1.22	0.3	0	0
ILMN_2752948	Exoc2	13	30.91	rs13481740	13	30.68	Y	Y	28.3	22.9	24.09	20.18	2		rs4229685	13	35.97	1.34	2.24	1.46	4.18	0	0
ILMN_1219591	1300014I06Rik	13	34.72	rs3707097	13	34.19	Y	Y	41.38	49.33	37.75	37.21	1		rs4229685	13	35.97	0.79	0.94	0.86	0.38	0	0
ILMN_2458967	2900079J23Rik	13	34.29	rs3707097	13	34.19	Y	Y	14.32	43.48	21.77	34.66	10		rs4229685	13	35.97	0.08	2.11	0.07	4.63	0	0
ILMN_1260062	LOC214149	3	121.89	rs3722313	13	41.45	N	N	0.17	0.53	0.11	26.77	5		rs13481780	13	41.3	0.23	2.23	4.12	0.03	0	0
ILMN_1254409	Atxn1	13	45.65	rs3688207	13	45.37	Y	Y	30.73	64.57	43.26	41.3	1		rs3688207	13	45.45	55.32	52.09	38.99	52	1	1
ILMN_2593994	5033430I15Rik	13	46.06	rs3725387	13	45.91	Y	Y	18.92	22.62	16.7	30.63	5		rs6308694	13	46.3	0.06	1.03	0.39	8.31	0	0
ILMN_1238557	Ccrk	13	64.54	gnf13.057.762	13	59.71	Y	Y	15.48	32.96	17.79	4.54	3		gnf13.056.787	13	58.83	4.71	0.01	0.02	0.22	0	0
ILMN_1232670	Mak10	13	59.73	gnf13.057.762	13	59.71	Y	Y	20.77	41.46	14.77	14.26	3		gnf13.056.787	13	58.83	2.85	0.81	3.24	0.48	0	0
ILMN_2520663	Zfp369	13	65.39	gnf13.057.762	13	59.71	Y	N	14.65	27.83	20.71	15.42	3		gnf13.056.787	13	58.83	8.42	1.08	10.87	3.81	0	0
ILMN_2624176	Nsun2	13	69.77	gnf13.057.762	13	59.71	Y	N	24.31	29.29	27.01	27.2	15		gnf13.056.787	13	58.83	0.02	10.07	2.09	0.98	0	0
ILMN_1245410	Adcy2	13	69.03	rs13481845	13	62.97	Y	N	13.97	12.87	39.12	14.31	4		rs13481850	13	63.97	0.66	8.39	11.36	4.29	0	0
ILMN_1245637	2010111I01Rik	13	63.17	D13Mit224	13	64.09	Y	Y	28.14	46.01	44.33	27.67	1		rs13481850	13	63.97	2.23	0.13	0.75	0.95	0	0
ILMN_2674655	1110018J18Rik	13	64.4	D13Mit224	13	64.09	Y	Y	23.62	22.22	23.8	30.11	5		rs13481850	13	63.97	4.91	0	0.01	0.85	0	0
ILMN_2678661	Fancc	13	63.41	D13Mit224	13	64.09	Y	Y	16.3	32.94	26.51	36.63	15		rs13481850	13	63.97	0.21	4.1	0.32	0	0	0
ILMN_1253241	3830402I07Rik	13	67.77	rs4229817	13	67.32	Y	Y	47.07	52.79	34.57	40.02	1		rs4229817	13	66.98	0.01	1.17	0.01	0.27	0	0
ILMN_3161206	Zfp85-rs1	13	67.85	rs4229817	13	67.32	Y	Y	4.52	35.1	13.57	11.84	3		rs4229817	13	66.98	0.97	0.56	0.29	0.41	0	0
ILMN_1247465	9630025I21Rik	13	67.57	rs4229817	13	67.32	Y	Y	30.35	33.83	20.99	13.83	6		rs4229817	13	66.98	35.44	42.07	47.49	46.19	1	0
ILMN_2535603	LOC383616	13		rs4229817	13	67.32	Y	Y	20.29	41.95	38.55	24.96	9		rs4229817	13	66.98	55.48	93.35	74.85	59.45	1	0
ILMN_1227383	LOC233184	13	68.14	rs4229817	13	67.32	Y	Y	18.86	28.24	22.37	28.37	10		rs4229817	13	66.98	43.19	42.23	33.71	32.1	1	0
ILMN_1249441	Cdk5rap1	2	154.17	rs13481861	13	69.04	N	N	18.92	21.68	7.08	26.84	5		D13Mit124	13	67.22	0.27	0.16	0.09	0.01	0	0
ILMN_2602821	Cdk5rap1	2	154.16	rs3670719	13	69.56	N	N	8.07	19.35	3.24	34.56	5		D13Mit124	13	67.22	0.19	1.81	0.27	1.43	0	0
ILMN_2776922	Glrx1	13	75.99	rs3664096	13	76.23	Y	Y	31.47	45.53	33.58	23.2	12		mCV24582540	13	76.56	2.77	4.99	5.24	2.59	0	0
ILMN_1213534	Ssbp2	13	91.81	rs6328703	13	92.18	Y	Y	30.31	35.48	36.21	26.08	1		rs6328703	13	91.84	0.25	0	0.38	2.32	0	0
ILMN_2624713	Mast4	13	103.52	rs3655295	13	103.77	Y	Y	5.66	31.51	3.95	11.38	3		rs3705092	13	104.05	0.57	1.29	0.58	1.05	0	0
ILMN_1238363	Pde4d	13	109.82	rs3681990	13	110.8	Y	Y	54.03	57.27	28.05	66.25	1		D13Mit291	13	111.23	0	0.31	2.08	0.03	0	0
ILMN_1233795	Rab3c	13	110.86	rs3681990	13	110.8	Y	Y	23.09	17.86	21.2	26.85	5		D13Mit291	13	111.23	0.07	0.17	2.88	7.9	0	0
ILMN_2596713	Aktip	8	90.03	rs6316705	13	117.05	N	N	6.13	10.96	3.82	31.25	5		rs3724755	13	116.24	0.02	0.19	0.02	1.67	0	0
ILMN_2604403	4933436C20Rik	8	94.85	rs6316705	13	117.05	N	N	14.66	2.73	9.47	27.93	5		rs3724755	13	116.24	0.43	0.28	0.21	1.76	0	0
ILMN_2598402	Parp8	13	117.65	rs3657414	13	117.66	Y	Y	36.68	46.74	19.28	69.79	13		rs3724755	13	116.24	0.88	0.73	0	1.01	0	0
ILMN_2585137	Ptbp1	13	0.12	rs3675054	13	120.53	Y	N	50.36	33.34	27.8	27.63	1		rs3675054	13	120.2	68.36	54.22	53.51	58.89	1	1
ILMN_2623315	E130304F04Rik	13	1	rs3675054	13	120.53	Y	Y	29.91	17.92	15.58	17.45	2		rs3675054	13	120.2	46.83	30.2	59.05	42.89	1	0
ILMN_1223318	4833420G17Rik	13	120.27	rs3675054	13	120.53	Y	Y	30.94	32.49	15.22	16.19	6		rs3675054	13	120.2	41.96	61.47	52.1	56.88	1	0
ILMN_1250018	4833420G17Rik	13	120.25	rs3675054	13	120.53	Y	Y	25.43	36.14	23.96	36.48	10		rs3675054	13	120.2	69.29	69.31	82.97	53.45	1	0
ILMN_2752569	Paip1	13	120.24	rs3675054	13	120.53	Y	Y	24.17	50.27	24.96	44.56	10		rs3675054	13	120.2	59.61	55.52	61.88	63.82	1	0
ILMN_2696066	3110070M22Rik	13	120.28	rs3675054	13	120.53	Y	Y	26.91	38.73	24.89	33.42	13		rs3675054	13	120.2	82.4	85.69	103.66	101.47	1	0
ILMN_1220253	Rpl15	14	18.34	rs3710916	14	6.81	Y	N	25.49	28.21	23.5	14.46	3		rs3710916	14	8.85	25.03	31.34	31.52	32.26	1	0
ILMN_2707808	Pdhb	14	9	rs3710916	14	6.81	Y	Y	59.36	63.99	22.58	40.61	13		rs3710916	14	8.85	63.48	78.93	81.37	51.6	1	0
ILMN_1243314	Rpl15	14	19.1	rs3710916	14	6.81	Y	N	43.23	59.83	19.21	30.11	13		rs3710916	14	8.85	48.09	48.56	53.95	32.29	1	0
ILMN_1218584	Rpp14	14	8.92	rs13482054	14	9.27	Y	Y	42.17	55.86	15.8	31.54	13		rs13482054	14	11.31	37.7	44.82	54.09	37.79	1	0
ILMN_2656189	Nkiras1	14	19.11	rs13482054	14	9.27	Y	N	70.79	67.21	18.91	38.8	13		rs13482054	14	11.31	60.54	76.95	64.56	63.28	1	0
ILMN_1253017	4931429P17Rik	13	48.07	rs3658866	14	21.75	N	N	0.15	0	28.12	3.38	4		rs13482098	14	24.87	1.72	0.46	2.87	0.31	0	0
ILMN_1226755	Nisch	14	32	rs13482122	14	29.85	Y	Y	22.76	24.94	15.36	34.16	5		rs4230248	14	32	45.43	50.81	55.95	27.41	1	0
ILMN_2761918	Mmrn2	14	35.22	rs3695383	14	32.63	Y	Y	19.1	19.04	30.62	22.52	4		rs4230248	14	32	0.16	0.46	0.44	1.36	0	0
ILMN_1251761	Phf5a	15	81.7	rs13482156	14	40.91	N	N	0.3	0.21	28.69	1.39	4		rs13482156	14	42.82	2.74	0.01	0.73	0	0	0
ILMN_2436561	Tmem19	10	114.78	rs13482156	14	40.91	N	N	0.02	1.75	27.5	0.15	4		rs13482156	14	42.82	1.19	1.9	3.31	0.24	0	0
ILMN_1246496	C130032J12Rik	14	24.57	rs6175724	14	45	N	N	9.9	33.48	14.57	16.99	3		rs3689402	14	46.4	0.1	0.2	0.05	0.25	0	0
ILMN_1254935	Mapk1ip1l	14	24.57	rs6175724	14	45	N	N	11.33	27.45	11.76	21.38	3		rs3689402	14	46.4	0.8	0.3	3.1	0.75	0	0
ILMN_1249922	Ppp1r3e	14	55.49	rs6175724	14	45	Y	N	13.32	9.51	0.47	28.18	5		rs3689402	14	46.4	0.22	2.68	0.92	0	0	0
ILMN_2776952	Apex1	14	51.55	D14Mit60	14	46.02	Y	N	14.42	31.21	12.65	11.99	3		rs3689402	14	46.4	0.05	0.01	2.44	0.02	0	0
ILMN_1225670	Rab2b	14	52.82	D14Mit60	14	46.02	Y	N	8.03	28.73	3.48	1.43	3		rs3689402	14	46.4	0.11	1.94	0.02	0.07	0	0
ILMN_2668886	C14orf101	14	49.13	D14Mit60	14	46.02	Y	Y	25.55	56.45	51.96	24.67	9		rs3689402	14	46.4	0.14	1.5	1.92	0.04	0	0
ILMN_1233365	Exoc5	14	49.69	mCV23384307	14	48.01	Y	Y	14.05	33.51	24.19	16.72	3		D14Mit101	14	50.14	0.02	1.63	1.29	0.77	0	0
ILMN_2510187	Mett11d1	14	52.51	rs6278789	14	48.71	Y	Y	41.58	70.26	42.44	73.93	1		D14Mit101	14	50.14	5.4	6.8	12.65	2.9	0	0
ILMN_2776710	Klhl33	14	51.52	rs6278789	14	48.71	Y	Y	39.19	59.23	61.13	53.1	1		D14Mit101	14	50.14	0.36	0.66	1.16	0.18	0	0
ILMN_2549473	Np	14	51.58	rs6278789	14	48.71	Y	Y	30.92	47.07	33.63	35.84	1		D14Mit101	14	50.14	2.04	1.3	0.06	1.26	0	0
ILMN_2771991	Ndrg2	14	52.53	rs6278789	14	48.71	Y	Y	13.54	35.63	17.03	14.44	3		D14Mit101	14	50.14	0.02	0.99	0	0.95	0	0
ILMN_1243558	Mettl3	14	52.91	rs6278789	14	48.71	Y	Y	25.22	32.38	17.4	24.38	3		D14Mit101	14	50.14	0.44	0.01	0	0.67	0	0
ILMN_2613469	Psmb5	14	55.24	rs6278789	14	48.71	Y	N	3.91	16.98	0.15	28.88	5		D14Mit101	14	50.14	0.28	2.42	0.91	0.19	0	0
ILMN_2713464	Abhd4	14	54.89	rs6278789	14	48.71	Y	N	31.22	26.8	26.92	22.77	12		D14Mit101	14	50.14	0.49	1.8	0.82	0.38	0	0
ILMN_2768053	Rpgrip1	14	52.78	rs6278789	14	48.71	Y	Y	30.83	78.38	25.41	60.27	13		D14Mit101	14	50.14	1.69	3.45	0.17	1.74	0	0
ILMN_1259924	Pspc1	14	57.4	rs6278789	14	48.71	Y	N	7.71	27.02	39.13	27.19	15		D14Mit101	14	50.14	27.15	36.49	46.55	38.02	1	0
ILMN_2598576	Parp2	14	51.44	rs6278789	14	48.71	Y	Y	23.32	54.45	26.69	27.26	15		D14Mit101	14	50.14	1.07	0.01	1.19	0.76	0	0
ILMN_1217470	Slc35f4	14	49.92	rs4230383	14	53.32	Y	Y	27.08	32.22	34.7	20.82	12		rs13482191	14	55.27	34.83	20.62	14.24	18.95	2	0
ILMN_2484358	Ppp1r3e	14	55.49	rs3707560	14	53.7	Y	Y	20.17	32.6	31.82	39.53	15		rs13482191	14	55.27	6.25	0.01	0.48	0.27	0	0
ILMN_2703082	Chd8	14	52.82	D14Mit63	14	54.39	Y	Y	39.47	27.05	13.14	16.15	6		rs8244195	14	56.59	0.71	0.69	0.03	1.88	0	0
ILMN_1250417	Adcy4	14	56.39	gnf14.051.589	14	55.75	Y	Y	13.68	36.32	16.55	7.61	3		gnf14.051.589	14	57.41	53.52	38.76	39.47	23.98	12	0
ILMN_2635738	Atp8a2	14	60.65	rs13482207	14	58.72	Y	Y	9.71	30.97	1.71	4	3		rs13482207	14	60.39	15.76	29.09	24.16	3.41	9	0
ILMN_1230858	Rhobtb2	14	70.08	rs13482213	14	60.25	Y	N	19.94	19.91	23.12	30.48	5		rs3710549	14	61.81	0.05	0.01	0.9	0.11	0	0
ILMN_1246563	Trim35	14	66.79	rs13482213	14	60.25	Y	N	35.31	32.85	21.78	14.14	6		rs3710549	14	61.81	1.36	4.47	0.35	0.01	0	0
ILMN_1249943	6430530L21Rik	14	69.98	rs13482213	14	60.25	Y	N	22.46	34.97	34.8	41.78	15		rs3710549	14	61.81	5.71	0.02	0.24	0.06	0	0
ILMN_1226174	Entpd4	14	69.98	rs13482214	14	60.55	Y	N	17.68	29.23	25.23	23.83	3		rs3710549	14	61.81	0.67	2.55	0.55	0.18	0	0
ILMN_2589312	Entpd4	14	69.98	rs13482214	14	60.55	Y	N	10.36	23.91	33.28	30.01	11		rs3710549	14	61.81	0.04	0.29	0.03	0.09	0	0
ILMN_2554110	Entpd4	14	69.98	rs13482214	14	60.55	Y	N	25.31	40.2	44.57	41.22	15		rs3710549	14	61.81	0	0.58	0.03	2.41	0	0
ILMN_1233004	ENSMUSG00000071316	14	69.98	rs13482235	14	66.86	Y	Y	17.9	25.81	41.25	30.26	11		D14Mit34	14	72.05	0.72	1.12	0.4	4.7	0	0
ILMN_2646511	1300010F03Rik	14	79.48	rs13482251	14	71.7	Y	N	14.75	21.63	18.94	28.19	5		rs13482249	14	72.65	12.85	7.07	9.9	8.42	0	0
ILMN_2733933	Narg1l	14	79.73	rs13482263	14	77.12	Y	Y	14.91	33.68	7.48	1.01	3		rs13482263	14	78.78	2.42	0.26	0.11	0.31	0	0
ILMN_2513781	A130038J17Rik	14	79.7	rs13482263	14	77.12	Y	Y	23.25	36.78	10.34	14.55	3		rs13482263	14	78.78	12.89	10.78	8.66	11.25	0	0
ILMN_2627006	Akap11	14	78.9	rs13482263	14	77.12	Y	Y	28.52	51.92	34.13	23.83	12		rs13482263	14	78.78	1.98	0.02	0.51	2.32	0	0
ILMN_2606436	Diap3	14	87.06	rs13482294	14	87.39	Y	Y	17.28	27.66	4.83	6.73	3		rs13482290	14	88.11	41.6	45.7	41.18	55.1	1	0
ILMN_2743642	Tgm1	14	56.32	rs13482313	14	92.59	Y	N	26.81	1.86	0.08	0.48	2		rs13482313	14	94.11	1.39	1.01	0.66	0.35	0	0
ILMN_1214088	D14Ertd581e	14	99.6	rs3688189	14	95.45	Y	Y	16.69	29.5	17.6	19.32	3		rs3688189	14	96.96	58.25	39.27	43.65	37.93	1	0
ILMN_1233613	Dis3	14	99.48	D14Mit228	14	98.27	Y	Y	12.8	30.12	20.12	15.48	3		D14Mit228	14	99.78	21.55	33.08	26.16	19.45	9	0
ILMN_1236453	Ugcgl2	14	119.46	gnf14.114.290	14	117.61	Y	Y	31.02	51.9	31.51	38.91	1		gnf14.114.290	14	119.13	5.8	2.28	0.39	0.94	0	0
ILMN_1214954	Cldn10	14	119.27	gnf14.114.290	14	117.61	Y	Y	24.18	44.13	25.93	31.45	10		gnf14.114.290	14	119.13	2.11	1.15	1.56	1.75	0	0
ILMN_1228406	Ugcgl2	14	119.46	rs13482396	14	118.45	Y	Y	10.28	32.23	21.52	19.61	3		rs6265743	14	120.11	0.19	0.86	2.72	2.21	0	0
ILMN_2736042	Cdh6	15	12.96	rs3681808	15	12.99	Y	Y	20.22	30.8	22.16	35.86	10		rs3711814	15	13.15	39.93	35.36	28.54	29.14	1	0
ILMN_1234196	6030458C11Rik	15	12.75	rs3681808	15	12.99	Y	Y	24.34	52	38.14	42.9	15		rs3711814	15	13.15	146.73	121.79	129.94	126.54	1	0
ILMN_1240451	ENSMUSG00000054546	15	26.77	rs13482490	15	26.72	Y	Y	6.88	14.83	14.78	26.39	5		rs3670581	15	27	0.04	0.36	1.47	1	0	0
ILMN_2604226	Sema5a	15	32.63	rs3091174	15	32.64	Y	Y	51.45	73	48.15	35.71	1		rs8267917	15	33.18	77.37	68.15	55.95	78.48	1	1
ILMN_2606660	Card10	15	78.61	rs13482661	15	78.59	Y	Y	25.98	29.42	10.23	28.43	10		rs13482644	15	72.46	1.22	0.53	0.02	0.31	0	0
ILMN_2507182	Tomm22	15	79.5	rs3667755	15	78.74	Y	Y	32.27	57.71	46.26	47.41	1		rs13482644	15	72.46	0.01	2.7	0.69	0.03	0	0
ILMN_1237789	Apobec3	15	79.75	rs3667755	15	78.74	Y	Y	27.54	9.83	9.02	8.28	2		rs13482644	15	72.46	2.08	2.33	0.27	0.87	0	0
ILMN_1250030	Cdc42ep1	15	78.68	rs3667755	15	78.74	Y	Y	6.41	31.73	16.81	11.26	3		rs13482644	15	72.46	1.61	0.84	0.37	1.3	0	0
ILMN_2586164	F830031D20Rik	15	79.88	rs3667755	15	78.74	Y	Y	22.02	33.52	17.86	12.88	3		rs13482644	15	72.46	0.03	0.12	0.34	0.01	0	0
ILMN_1239196	1700088E04Rik	15	78.97	rs3667755	15	78.74	Y	Y	37.81	24.06	21.1	32.86	8		rs13482644	15	72.46	0.53	1.68	1.44	0	0	0
ILMN_2654906	Mgat3	15	80.05	rs3667755	15	78.74	Y	Y	25.37	46.44	37.11	24.53	9		rs13482644	15	72.46	0.08	1.55	0.66	0.92	0	0
ILMN_1248252	Pacsin2	15	83.21	CEL-15_83283496	15	82.75	Y	Y	26.44	15.67	4.69	45.85	8		D15Mit171	15	89.89	0.14	1.94	1.48	0.15	0	0
ILMN_2459388	Ttll12	15	83.41	rs13482677	15	82.94	Y	Y	28.06	20.48	9.5	21.69	2		D15Mit171	15	89.89	1.22	1.37	0.2	0.03	0	0
ILMN_1249844	Efcab3	15	83.7	rs13482677	15	82.94	Y	Y	12.13	23.83	12.42	27.21	5		D15Mit171	15	89.89	0.44	0.05	0.01	0.32	0	0
ILMN_2619455	Mcat	15	83.38	rs13482677	15	82.94	Y	Y	22.84	45.18	27.89	39.98	15		D15Mit171	15	89.89	0.25	5.66	0.04	0.48	0	0
ILMN_2728985	Fbln1	15	85.1	rs13482681	15	83.87	Y	Y	29.54	32.68	34.91	54.52	1		D15Mit171	15	89.89	0.51	0.01	0.52	2.76	0	0
ILMN_2594049	Gtlf3b	11	60.72	rs3710055	15	87.79	N	N	1.88	0	33.11	0.01	4		D15Mit171	15	89.89	2.52	8.45	4.73	0.1	0	0
ILMN_2517138	D15Ertd528e	15	97.87	rs3710056	15	97.4	Y	Y	28.89	16.81	6.94	3.69	2		rs3023427	15	97.54	0.03	1.86	0.82	0.11	0	0
ILMN_1238862	Rapgef3	15	97.58	rs3710056	15	97.4	Y	Y	19.09	39.07	18.15	17.93	3		rs3023427	15	97.54	88.6	73.57	64.34	57.43	1	0
ILMN_1231074	Sp7	15	102.19	rs3686133	15	102.19	Y	Y	17.92	29.67	18.26	19.52	3		rs3686133	15	102.19	32.6	23.99	22.53	22.28	2	0
ILMN_1223544	Copz1	15	103.13	rs13482751	15	102.78	Y	Y	20.23	43.2	36.37	29.96	15		rs13482751	15	102.78	20.69	24.75	20.08	18.94	3	0
ILMN_1234308	Dexi	16	10.5	rs4161101	16	10.51	Y	Y	33.81	63.17	34.84	37.87	1		rs4163042	16	13.14	1.32	1.31	1.11	0.02	0	0
ILMN_1241643	Ntan1	16	13.83	rs4151923	16	13.73	Y	Y	60.18	81.84	57.61	57.39	1		rs3090019	16	13.9	1.62	11.42	13.55	3.77	0	0
ILMN_1249297	Pdxdc1	16	13.83	rs4151923	16	13.73	Y	Y	67.61	79.69	59.21	60.06	1		rs3090019	16	13.9	3.26	3.97	7.71	9.24	0	0
ILMN_2727980	Pdxdc1	16	13.84	rs4151923	16	13.73	Y	Y	24.86	59.73	32.75	39.79	15		rs3090019	16	13.9	5.45	2.76	0.55	0.56	0	0
ILMN_1250922	Pdxdc1	16	13.84	rs4164131	16	14.29	Y	Y	29.3	55.15	29.06	26.89	1		rs4164131	16	14.38	3.18	0.01	0.61	0.2	0	0
ILMN_2694055	4921513D23Rik	16	14.11	rs4164131	16	14.29	Y	Y	41.92	74.02	25.26	37.26	13		rs4164131	16	14.38	57.63	55.7	57.75	40.31	1	0
ILMN_1224913	LOC381044	16	34.21	rs4171718	16	33.92	Y	Y	4.25	22.86	33.49	25.79	4		rs4170974	16	32.96	60.07	73.15	66.56	56.08	1	0
ILMN_1224927	Dirc2	16	35.7	rs4171718	16	33.92	Y	Y	11.94	41.54	28.34	22.31	9		rs4170974	16	32.96	42.15	41.03	49.25	29.82	1	0
ILMN_1222763	Slc15a2	16	36.77	rs4173858	16	36.53	Y	Y	25.57	53.85	42.63	68.45	15		rs4173870	16	36.95	85.78	91.65	126.37	70.58	1	0
ILMN_2473313	Gmeb1	4	131.78	rs4177853	16	40.73	N	N	5.96	26.86	0.05	2.22	3		rs4177203	16	40.24	3.63	0.09	3.28	0.17	0	0
ILMN_1234824	Ccdc80	16	45.13	rs4179504	16	44.18	Y	Y	40.27	50.06	39.27	56	1		D16Mit138	16	45.69	1.58	1.94	0.1	0.04	0	0
ILMN_1214255	Cd200	16	45.41	rs4179504	16	44.18	Y	Y	31.93	45.48	27.2	46.51	1		D16Mit138	16	45.69	0.58	1.41	0.19	0.14	0	0
ILMN_2600043	Slc35a5	16	45.14	rs4179504	16	44.18	Y	Y	17.56	34.44	19.17	25.58	3		D16Mit138	16	45.69	0.93	0.03	0.02	0.34	0	0
ILMN_2683621	Preb	5	31.26	rs4179504	16	44.18	N	N	0.94	28.51	0.29	0.4	3		D16Mit138	16	45.69	3.17	2.91	0.65	0.37	0	0
ILMN_1229433	Tmprss7	16	45.66	rs4179504	16	44.18	Y	Y	28.01	45.55	15.52	31.43	13		D16Mit138	16	45.69	61.1	93.92	55.84	39.59	1	0
ILMN_1225130	LOC385909	16	45.2	rs4179504	16	44.18	Y	Y	20.97	44.31	29.93	26.65	15		D16Mit138	16	45.69	0.04	0.39	10.76	1.78	0	0
ILMN_1233785	Cd200r1	16	44.51	rs4180247	16	44.99	Y	Y	23.63	26.43	14.14	14.42	3		D16Mit138	16	45.69	1.93	0.33	0.5	0.04	0	0
ILMN_1228262	Epha6	16	59.76	rs4189478	16	57.47	Y	Y	24.46	29.18	17.54	19.44	3		rs4189119	16	56.98	40.49	46.57	48.09	36.58	1	0
ILMN_2605457	Dock5	14	68.43	rs4189478	16	57.47	N	N	0.08	0.66	0.97	27.15	5		rs4189119	16	56.98	1.85	2.28	1.75	0.55	0	0
ILMN_1221859	Jagn1	6	113.4	rs4192837	16	60.27	N	N	1.11	27.97	0.08	0	3		rs4193194	16	61.49	0.51	0.46	4.39	1.47	0	0
ILMN_1255385	Chst1	2	92.46	rs4193040	16	60.52	N	N	0.01	26.92	2.09	0.37	3		rs4193194	16	61.49	4.29	0.02	0.61	2.51	0	0
ILMN_1242936	Usp15	10	122.32	rs4193136	16	61.35	N	N	0.62	0.14	27.86	2.53	4		rs4193194	16	61.49	0	1.33	0.06	2.2	0	0
ILMN_1225277	Htr1f	16	64.93	rs4151935	16	63.72	Y	Y	24.1	38.23	20.11	18.28	3		rs3687551	16	63.57	1.26	0.16	1.14	0.13	0	0
ILMN_1259352	LOC386154	16	68.09	rs4197673	16	66.85	Y	Y	8.85	26.96	9.49	12.08	3		rs3687551	16	63.57	0.31	0.34	0.06	2	0	0
ILMN_1239696	E130116C07Rik	16	72.42	rs4199265	16	69.69	Y	Y	31.26	33.76	30.3	34.32	1		rs3687551	16	63.57	3.58	1.13	0.05	0.08	0	0
ILMN_1258517	Gbe1	16	70.53	rs4199265	16	69.69	Y	Y	27.89	36.86	20.27	17.94	6		rs3687551	16	63.57	4.39	0	4.16	0.77	0	0
ILMN_1253815	Hspa13	16	75.76	rs4205157	16	74.8	Y	Y	16.58	33.63	15.82	17.17	3		rs4211515	16	82.39	0.48	2.37	0.99	3.18	0	0
ILMN_2608811	Cbr3	16	93.69	rs6389547	16	93.57	Y	Y	21.76	9.47	12.14	30.97	5		rs6389547	16	93.68	29.88	37.83	47.25	27.27	1	0
ILMN_1254674	Ttc23	7	74.91	rs13482845	17	4.55	N	N	0.7	3.01	2.11	26.46	5		rs3725494	17	4.07	1.35	4.62	2.84	1.3	0	0
ILMN_2639012	Ccr6	17	8.45	gnf17.005.541	17	7.39	Y	Y	35.71	64.95	51.44	65.71	1		rs13482854	17	7.34	0.02	0.11	6.33	0.52	0	0
ILMN_2625279	Pacrg	17	10.6	rs13482868	17	10.24	Y	Y	17.92	33.43	20.84	25.73	3		rs13482865	17	9.64	0.67	0.07	0.01	1.36	0	0
ILMN_1242457	Fpr-rs2	17	18.03	rs3662820	17	12.16	Y	N	43.79	54.19	38.33	53.12	1		rs13482873	17	11.61	34.53	36.25	31.96	36.62	1	1
ILMN_1251142	3110052M02Rik	17	21.79	rs3662820	17	12.16	Y	N	17.85	39.17	21.6	19.48	3		rs13482873	17	11.61	30.27	25.97	23.08	25.25	13	0
ILMN_1236799	Ttll2	17	7.56	rs3662820	17	12.16	Y	Y	36.24	40.99	23.47	43.92	13		rs13482873	17	11.61	38.33	57.78	57.6	55.02	1	0
ILMN_1234412	A630033E08Rik	17	23	CEL-17_20354682	17	21.4	Y	Y	28.87	53.62	34.12	36.22	1		rs3023864	17	24.33	95.13	86.26	69.66	90.42	1	1
ILMN_1244199	EG240038	17	22.34	CEL-17_20354682	17	21.4	Y	Y	11.37	26.46	17.76	34.98	10		rs3023864	17	24.33	47.09	57.31	51.6	57.75	1	0
ILMN_2496745	Ift140	17	25.23	CEL-17_21879142	17	22.91	Y	Y	40.48	52.59	38.2	62.31	1		rs3023864	17	24.33	50.75	52.05	52.25	74.75	1	1
ILMN_2650180	4931440B09Rik	17	23.97	CEL-17_21879142	17	22.91	Y	Y	44.19	46.79	46.31	39.94	1		rs3023864	17	24.33	47.23	43.62	31.1	39.9	1	1
ILMN_1214408	Rps2	17	24.86	CEL-17_21879142	17	22.91	Y	Y	72.43	86.18	59.9	72.66	1		rs3023864	17	24.33	0.27	1.09	0.15	0.89	0	0
ILMN_2764325	9930021D14Rik	17	24.61	CEL-17_21879142	17	22.91	Y	Y	66.95	77.74	48.84	85.93	1		rs3023864	17	24.33	2.23	0.16	0.02	0.02	0	0
ILMN_1252141	Caskin1	17	24.64	CEL-17_21879142	17	22.91	Y	Y	51.96	51.92	28.35	39.34	1		rs3023864	17	24.33	10.79	16.32	10.67	15.09	0	0
ILMN_2417991	Ube2i	17	25.4	CEL-17_21879142	17	22.91	Y	Y	31.96	22.69	24.2	24.86	2		rs3023864	17	24.33	0.07	0.48	1.15	1.75	0	0
ILMN_3160203	Zfp213	17	23.69	CEL-17_21879142	17	22.91	Y	Y	10.86	29.95	9.48	14.23	3		rs3023864	17	24.33	40.33	37.64	29.31	33.12	1	0
ILMN_2621921	Clcn7	17	25.3	CEL-17_21879142	17	22.91	Y	Y	8	35.5	4.07	17.94	3		rs3023864	17	24.33	1.36	0.76	0.44	0.96	0	0
ILMN_1235435	ILM105670433	17		CEL-17_21879142	17	22.91	Y	Y	14.72	36.64	20.11	16.84	3		rs3023864	17	24.33	0.04	2.65	1.02	0.62	0	0
ILMN_1220063	LOC207695	17	26.68	CEL-17_21879142	17	22.91	Y	Y	10.56	34.85	10.08	18.73	3		rs3023864	17	24.33	0	1.84	0.3	0.08	0	0
ILMN_2622446	Caskin1	17	24.65	CEL-17_21879142	17	22.91	Y	Y	34.52	54.47	25.71	23.13	6		rs3023864	17	24.33	0	4.93	0.13	1.53	0	0
ILMN_2650578	1600002H07Rik	17	24.35	CEL-17_21879142	17	22.91	Y	Y	20.86	27.51	18.68	31.02	10		rs3023864	17	24.33	0.12	0.12	0.55	0.22	0	0
ILMN_2645276	Spsb3	17	25.03	CEL-17_21879142	17	22.91	Y	Y	40.87	36.59	21.57	35.16	13		rs3023864	17	24.33	0.19	0.79	0	1.57	0	0
ILMN_1258556	Npw	17	24.79	rs6397584	17	27.18	Y	Y	29.5	18.78	6.3	9.76	2		D17Mit100	17	26.32	8.66	11.13	3.34	2.29	0	0
ILMN_1259267	ENSMUSG00000054651	17	24.27	rs6397584	17	27.18	Y	Y	27.74	11.07	9.97	17.03	2		D17Mit100	17	26.32	0.02	0.98	0.48	1.94	0	0
ILMN_2717549	ILM1340647	17		rs6397584	17	27.18	Y	Y	22.66	39.5	17.87	22.07	3		D17Mit100	17	26.32	0.05	0.05	0	0.15	0	0
ILMN_1252183	BC004004	17	29.44	rs6397584	17	27.18	Y	Y	21.84	30.16	17.57	11.29	3		D17Mit100	17	26.32	0.96	0.55	0.02	0	0	0
ILMN_2669062	Pi16	17	29.47	rs6397584	17	27.18	Y	Y	30	29.24	30.1	11.27	12		D17Mit100	17	26.32	1.35	0	0.5	0.29	0	0
ILMN_2737903	Fgd2	17	29.52	rs13482934	17	27.58	Y	Y	31.7	37.36	24.65	46.39	13		D17Mit100	17	26.32	3.11	0.85	5.02	1.51	0	0
ILMN_2584173	4933414I19Rik	17	31.01	rs13482942	17	29.61	Y	Y	31.12	40.65	17.69	35.13	13		D17Mit100	17	26.32	0.95	0.71	0.29	0.13	0	0
ILMN_2675337	H2-Q6	17	35.57	rs3672987	17	32.85	Y	Y	48.38	56.75	44.71	54.76	1		D17Mit34	17	34.88	1.41	0.46	0.24	3.91	0	0
ILMN_2607675	H2-Ab1	17	34.41	rs3672987	17	32.85	Y	Y	52.39	56.35	43.3	48.31	1		D17Mit34	17	34.88	0.63	3.99	0.01	3.64	0	0
ILMN_2770183	Ddah2	17	35.2	rs3672987	17	32.85	Y	Y	27.39	19.83	3.36	2.16	2		D17Mit34	17	34.88	0.25	0.31	1.54	0.44	0	0
ILMN_1260152	Adamts10	17	33.67	rs3672987	17	32.85	Y	Y	28.15	19.22	17.56	24.54	2		D17Mit34	17	34.88	2.54	0.03	0.03	0.06	0	0
ILMN_2588139	H2-K1	17	34.13	rs3672987	17	32.85	Y	Y	16.85	11.37	13.89	26.6	5		D17Mit34	17	34.88	0.65	0.34	1.35	0.96	0	0
ILMN_2519789	Zfp101	17	33.52	rs3672987	17	32.85	Y	Y	28.91	35.78	30.66	23.93	12		D17Mit34	17	34.88	4.04	0.13	0.51	0.12	0	0
ILMN_2670895	Bat1a	17	35.39	rs3672987	17	32.85	Y	Y	36.09	48.02	28.57	21.66	12		D17Mit34	17	34.88	2.21	0.02	1.59	1.77	0	0
ILMN_1220986	H2-Q5	17	35	rs3672987	17	32.85	Y	Y	25.38	43	45.77	29.52	15		D17Mit34	17	34.88	21.59	21.95	40.4	14.75	4	0
ILMN_1248382	H2-D1	17	35.4	rs3672987	17	32.85	Y	Y	20.1	30.89	32	33.84	15		D17Mit34	17	34.88	55.8	54.6	35.37	51.48	1	0
ILMN_1231540	Lrig3	10	125.43	rs13482967	17	36.49	N	N	0.98	0.66	27.49	0.08	4		rs3682923	17	35.97	2.57	2.69	2.91	5.15	0	0
ILMN_1214731	H2-T17	17	36.18	rs13482967	17	36.49	Y	Y	35.36	30.61	18.91	15.9	6		rs3682923	17	35.97	4.27	0.01	0.68	0.52	0	0
ILMN_1230878	H2-T9	17	36.18	rs13482967	17	36.49	Y	Y	25.16	30.65	30.91	25.42	9		rs3682923	17	35.97	0.69	0	0.76	0.08	0	0
ILMN_2733717	Tdrd6	17	43.75	rs3656008	17	43.09	Y	Y	24.56	36.34	27.69	16.29	9		gnf17.044.067	17	43.78	88.46	89.88	67.37	76.88	1	0
ILMN_1234833	Cyp39a1	17	43.88	rs13482997	17	43.29	Y	Y	4.25	26.48	9.96	5.52	3		gnf17.044.067	17	43.78	3.7	1.2	0.03	0.07	0	0
ILMN_2656465	Tjap1	17	46.4	UT_17_44.961343	17	45.03	Y	Y	4.11	26.8	8.7	0.28	3		UT_17_44.961343	17	45.7	2.62	2.03	1.2	0.94	0	0
ILMN_2631205	Fert2	17	64.49	rs13483012	17	48.07	Y	N	0.04	0.11	28.63	0.29	4		D17Mit10	17	47.67	0.15	0.85	0.34	0.46	0	0
ILMN_1239055	Xdh	17	74.23	rs6322076	17	72.15	Y	Y	9.56	6.48	8.84	31.32	5		rs13483096	17	72.61	0.35	1.96	4.35	0.13	0	0
ILMN_1232989	Ehd3	17	74.18	rs6322076	17	72.15	Y	Y	20.8	30.3	19.99	32.36	10		rs13483096	17	72.61	0.58	0.07	0.34	5.24	0	0
ILMN_1219591	1300014I06Rik	13	34.72	rs13483110	17	76.07	N	N	28.48	20.49	16.11	19.03	2		rs13483110	17	76.56	0.23	0	0.02	0.36	0	0
ILMN_1242367	Sult6b1	17	79.29	gnf17.080.475	17	79.07	Y	Y	10.76	35.9	16.87	25.6	3		gnf17.081.038	17	80.13	1.51	1.23	0.53	1.04	0	0
ILMN_2683718	Lrpprc	17	85.17	rs13483136	17	83.66	Y	Y	14.64	44.05	17.73	23.37	3		rs3706971	17	84.18	21	31.23	47.16	32.48	15	0
ILMN_1232235	Thada	17	84.59	rs13483136	17	83.66	Y	Y	8.45	30.44	4.83	5.44	3		rs3706971	17	84.18	0.6	1.44	1.36	2.05	0	0
ILMN_1232487	B230310H07Rik	2	140.66	rs13483200	18	9.9	N	N	15.49	28.06	7.52	16.27	3		gnf18.007.239	18	10.21	0.38	0.01	0.8	0.15	0	0
ILMN_1239955	Cdh2	18	16.76	rs6358426	18	16.56	Y	Y	50.89	85.11	53.81	74.53	1		rs6358426	18	16.57	110.81	104.93	92.48	115.73	1	1
ILMN_1233779	Epb4.1l4a	18	33.96	rs3723947	18	30.58	Y	Y	1.89	15.83	3.49	28.85	5		gnf18.027.000	18	29.69	20.43	22.48	18.09	25.66	5	5
ILMN_2708107	Camk4	18	33.35	rs3666799	18	32.03	Y	Y	33.61	73.1	35.63	59.64	1		rs3694865	18	32.12	27.77	24.71	27.48	46.76	1	1
ILMN_1229721	Camk4	18	33.35	rs3666799	18	32.03	Y	Y	24.04	38.69	16.8	20.32	3		rs3694865	18	32.12	33.89	46.49	47.43	54.04	1	0
ILMN_1220939	Epb4.1l4a	18	33.96	rs3666799	18	32.03	Y	Y	13.99	33.36	14.46	24.51	3		rs3694865	18	32.12	0.01	0.79	0.41	7.83	0	0
ILMN_2455304	Camk4	18	33.36	rs3666799	18	32.03	Y	Y	19.19	59.9	25.16	34.9	10		rs3694865	18	32.12	51.64	47.65	44.85	65.27	1	0
ILMN_2746009	Pcdhga2	18	37.83	rs13483299	18	36.25	Y	Y	26.24	34.73	31.3	33.64	1		rs6163326	18	35.97	38.5	35.35	38.28	42.94	1	1
ILMN_1235004	Pcdha8	18	37.15	rs13483299	18	36.25	Y	Y	16.83	32.49	11.17	14.51	3		rs6163326	18	35.97	38.34	52.71	65.34	42.99	1	0
ILMN_2620037	Tmco6	18	36.9	rs13483299	18	36.25	Y	Y	3.64	29.31	13.15	14.22	3		rs6163326	18	35.97	7.38	0	0.19	5.09	0	0
ILMN_2705452	Pcdhga8	18	37.89	rs13483299	18	36.25	Y	Y	1.63	35.7	27.56	16.93	9		rs6163326	18	35.97	15.81	24.1	24.16	18.09	9	9
ILMN_2722632	Pcdhgb6	18	37.9	rs3669650	18	39.07	Y	Y	12.61	26.23	14.2	9.97	3		D18Mit94	18	38.24	18.73	27.63	5.98	7.7	3	3
ILMN_1228204	D330025A21Rik	18	44.99	rs13483328	18	43.28	Y	Y	13.34	37.65	18.94	36.02	10		rs13483324	18	42.57	46.65	49.97	48.4	43.93	1	0
ILMN_1250948	Ptpn2	18	67.83	rs3716803	18	67.12	Y	Y	5.31	29.87	6.61	12.21	3		rs3704084	18	66.72	2.39	0.14	1.08	0.01	0	0
ILMN_1230263	Me2	18	73.93	rs13483437	18	73.97	Y	Y	46.51	72.45	29.34	78.51	1		rs13483436	18	73.59	66.82	96.26	82.59	55.35	1	1
ILMN_1227624	Elac1	18	73.9	rs13483437	18	73.97	Y	Y	17.92	44.14	21.15	42.05	10		rs13483436	18	73.59	49.56	51.14	40.22	43.82	1	0
ILMN_1227636	2810433K01Rik	18	74.23	rs13483438	18	74.34	Y	Y	26.87	39.34	25.72	24.69	6		rs6199678	18	75.06	39.01	54.23	49.34	42.83	1	0
ILMN_1258768	Katnal2	18	77.22	D18Mit80	18	77.03	Y	Y	19.3	32.14	16.99	18.97	3		D18Mit7	18	77.09	12.65	15	6.39	21.25	0	0
ILMN_1235237	8030462N17Rik	18	77.91	rs3705890	18	77.07	Y	Y	23.38	25.74	20.23	28.81	5		D18Mit7	18	77.09	0.13	1.39	0.2	0.04	0	0
ILMN_2531520	Gm962	19	5.57	rs13483499	19	3.41	Y	Y	38.24	74.63	41.11	36.51	1		D19Mit109	19	6.21	0.14	3.49	0.35	0.01	0	0
ILMN_2493030	2310043N10Rik	19	5.84	rs13483499	19	3.41	Y	Y	36.79	72.94	50.92	56.84	1		D19Mit109	19	6.21	1.53	0.24	0.35	0.47	0	0
ILMN_2776619	Ltbp3	19	5.76	rs13483499	19	3.41	Y	Y	26.02	6.43	10.03	16.42	2		D19Mit109	19	6.21	3.14	0.61	0.96	0.9	0	0
ILMN_2776034	Gal	19	3.41	rs13483499	19	3.41	Y	Y	15.7	27.66	18.15	22.68	3		D19Mit109	19	6.21	0.03	0.02	2.13	0.09	0	0
ILMN_1221009	Suv420h1	19	3.48	rs13483499	19	3.41	Y	Y	17.38	34.94	25.87	12.44	3		D19Mit109	19	6.21	0.03	0.98	0.62	3.64	0	0
ILMN_1213376	Cfl1	19	5.49	rs13483499	19	3.41	Y	Y	25.66	13.22	30.69	20.38	4		D19Mit109	19	6.21	6.93	0.01	2.78	7.47	0	0
ILMN_2449150	Map4k2	19	6.36	rs13483499	19	3.41	Y	Y	27.15	38.01	24.66	26.49	13		D19Mit109	19	6.21	1.26	1.68	0.22	2.86	0	0
ILMN_2567347	Zdhhc24	19	4.88	rs13483511	19	6.54	Y	Y	10.82	27.61	15.87	32.38	10		rs13483511	19	6.54	0.23	0.52	0.17	0.29	0	0
ILMN_1237390	Bbs1	19	4.89	rs13483513	19	7.34	Y	Y	14.02	31.85	10.13	7.63	3		rs13483512	19	6.99	0.02	0.42	0.14	1	0	0
ILMN_1255162	Fads1	19	10.26	rs6413006	19	10.24	Y	Y	25.83	29.2	25	26.22	10		rs6413006	19	10.25	58.49	43.04	51.31	45.76	1	0
ILMN_1242106	BC016495	19	18.73	rs13483549	19	18.22	Y	Y	27.64	57.21	32.17	41.91	1		rs3681194	19	18.46	75.5	68.94	68.69	65.11	1	1
ILMN_2746356	Tle4	19	14.62	rs13483549	19	18.22	Y	Y	3.6	7.92	4.43	29.27	5		rs3681194	19	18.46	1.59	0.17	0	1.47	0	0
ILMN_1248532	Pcsk5	19	17.75	rs3694495	19	19.96	Y	Y	14.68	25.21	31.35	24.24	4		rs3694495	19	19.96	47.63	41.1	42.1	77.19	1	0
ILMN_1238179	Ipmk	10	70.84	rs3694495	19	19.96	N	N	0.2	1.63	2.97	26.12	5		rs3694495	19	19.96	2.9	2.79	2.57	1.39	0	0
ILMN_1253083	Trpm3	19	22.81	rs3653630	19	22.52	Y	Y	37.16	30.93	28.54	30.26	1		rs3707812	19	22.48	44.4	38.33	32.56	28.62	1	1
ILMN_2438463	Ptar1	19	23.8	rs4232105	19	23.23	Y	Y	17.96	46.75	21.82	21.04	3		rs4232105	19	23.24	78.26	59.31	66.56	80.02	1	0
ILMN_1253191	E230024B12Rik	19	23.21	rs4232105	19	23.23	Y	Y	44.55	57.86	17.97	39.49	13		rs4232105	19	23.24	79.67	57.13	63.14	73.54	1	0
ILMN_1246417	B230104F01Rik	19	23.95	rs6259521	19	24.01	Y	Y	8.56	31.93	21.59	16.21	3		rs6259521	19	24.02	31.92	31.45	54.05	34.8	1	0
ILMN_1220560	Pgm5	19	24.76	rs6259521	19	24.01	Y	Y	28.56	36.71	18.25	18.49	6		rs6259521	19	24.02	46.13	33.44	33.84	32.34	1	0
ILMN_2709864	Cbwd1	19	24.99	rs6259521	19	24.01	Y	Y	25.71	58.28	27.15	17.22	9		rs6259521	19	24.02	72.28	91.86	87.24	67.56	1	0
ILMN_2711562	Pip5k1b	19	24.37	rs6259521	19	24.01	Y	Y	19.97	38.99	19.67	30.2	10		rs6259521	19	24.02	46.8	38.53	56.27	47.29	1	0
ILMN_1230407	2900009I07Rik	19	24.55	rs3701438	19	25.73	Y	Y	13.13	47.62	22.47	22.83	3		rs3701438	19	25.74	45.98	38.31	42.62	36.92	1	0
ILMN_1239783	Ide	19	37.37	gnf19.035.258	19	37.53	Y	Y	41.33	43.19	23.97	38.62	13		gnf19.035.258	19	37.54	52.62	60.34	69.31	61.13	1	0
ILMN_2470360	BC037704	19	43.75	D19Mit89	19	42.55	Y	Y	40.81	41.14	12.09	39.2	13		D19Mit89	19	42.57	50.27	65.02	70.12	46.08	1	0
ILMN_1252502	Hif1an	19	44.64	rs13483639	19	44.24	Y	Y	9.44	32.14	10.29	21.1	3		rs13483639	19	44.27	42.3	49.86	37.68	36.58	1	0
ILMN_1252475	Gm969	19	48.11	rs13483641	19	45.04	Y	Y	8.86	35.95	5.96	11.24	3		D19Mit53	19	45.23	18.36	8.43	24.27	13.38	4	0
ILMN_1219547	A730037C10Rik	3	54.98	rs13483641	19	45.04	N	N	0.45	26.07	0.13	2.06	3		D19Mit53	19	45.23	4.5	0.22	0.18	0.74	0	0
ILMN_2763051	Hps6	19	46.08	rs13483647	19	46.64	Y	Y	26.57	12.42	5.85	9.58	2		rs3705264	19	47.05	1.32	0.15	0.02	0.73	0	0
ILMN_2748300	2010012O05Rik	19	46.78	rs13483647	19	46.64	Y	Y	19.92	39.39	17.78	17.91	3		rs3705264	19	47.05	68.34	95.65	85.31	62.38	1	0
ILMN_1247626	As3mt	19	46.79	rs13483647	19	46.64	Y	Y	19.53	26.74	15.69	18.22	3		rs3705264	19	47.05	0	0.66	0.09	0.31	0	0
ILMN_1251041	Btrc	19	45.6	rs13483647	19	46.64	Y	Y	30.36	28.09	4.95	17.11	6		rs3705264	19	47.05	64.07	69.48	55.36	42.89	1	0
ILMN_2590321	Nhlrc2	19	56.67	rs13483686	19	56.14	Y	Y	8.5	27.57	11.76	16.11	3		rs3686750	19	56.42	23.48	24.71	19.19	21	3	3
ILMN_1217254	Atrnl1	19	58.21	rs6259462	19	57.95	Y	Y	34.36	24.68	31.15	28.53	14		rs6259462	19	57.97	0.13	0.28	0.02	0	0	0
ILMN_1222245	5830428H23Rik	19	61.2	UT_4_59.889299	19	60.14	Y	Y	33.55	68.53	28.11	45.86	1		rs6191324	19	59.4	0.47	0.22	0.22	0.54	0	0
ILMN_1241044	BC029127	19	61.19	UT_4_59.889299	19	60.14	Y	Y	29.23	34.59	32.9	28.32	1		rs6191324	19	59.4	5.63	2.15	0.82	0.52	0	0
ILMN_2637624	1810055E12Rik	19	60.91	UT_4_59.889299	19	60.14	Y	Y	17.36	46.09	12.39	15.99	3		rs6191324	19	59.4	13.58	12.2	9.97	19.08	0	0
ILMN_1258205	5830428H23Rik	19	61.19	UT_4_59.889299	19	60.14	Y	Y	24.22	21.05	27.02	20.48	4		rs6191324	19	59.4	2.34	2.67	0.54	0.08	0	0
ILMN_1230457	Cd99l2	X	68.67	rs3157124	X	67.7	Y	Y	13.28	24.27	27.57	4.39	4		rs13483797	X	65.41	0	0.38	5.15	0.28	0	0
ILMN_2677876	Arhgap4	X	71.14	rs13483824	X	70.13	Y	Y	19.05	36.68	28.56	35.84	15		rs13483797	X	65.41	0.02	0.14	0.65	7.81	0	0
ILMN_2594718	Adam17	12	21.33	rs13483868	X	80.85	N	N	5.81	27.72	5.92	2.56	3		CEL-X_75125049	X	80.82	3.52	0.37	1.21	0.83	0	0
ILMN_1219563	Gprasp1	X	132.29	rs13484015	X	131.48	Y	Y	3.11	28.12	14.24	8.76	3		rs13484015	X	132.66	1.59	0.03	0.28	1.02	0	0
ILMN_2632964	BC031748	X	133.61	rs13484018	X	132.14	Y	Y	29.27	41.86	29.45	37.01	1		gnfX.116.876	X	133.13	2.11	0.76	0.47	0.09	0	0
ILMN_2616135	Osbpl8	10	110.73	rs13484060	X	142.21	N	N	0	0.66	28.77	0.84	4		rs13484060	X	143.4	0.07	0.04	0.37	7.57	0	0
ILMN_2721999	Piga	X	160.86	CEL-X_154259201	X	159.63	Y	Y	18.1	27.67	12.51	10.28	3		DXMit99	X	156.15	0.11	1.13	0.86	0.49	0	0
ILMN_2729364	Glra2	X	161.57	CEL-X_154259201	X	159.63	Y	Y	10.7	27.19	9.09	17.56	3		DXMit99	X	156.15	0.17	0.03	0.36	0.13	0	0
